# Supplementary material for: Targeting of Protein Kinase CK2 in Acute Myeloid Leukemia Cells Using the Clinical-Grade Synthetic-Peptide CIGB-300
Source: MDPI journal article supplement (doi:10.3390/biomedicines9070766), 2021-07-01
Supplement: s1 [file s1]

**Table S1:** Characteristics of AML patients.

| Patient | Sex    | Age      | AML FAB subtype | Bone marrow blast |
|---------|--------|----------|-----------------|-------------------|
| 1       | Female | 76 years | FAB-M4          | 50 %              |
| 2       | Male   | 54 years | FAB-M2          | 80 %              |
| 3       | Male   | 59 years | FAB-M2          | 50 %              |
| 4       | Female | 73 years | FAB-M5          | 90 %              |
| 5       | Male   | 47 years | FAB-M2          | 60 %              |
