# Supplementary material for: Targeting of Protein Kinase CK2 in Acute Myeloid Leukemia Cells Using the Clinical-Grade Synthetic-Peptide CIGB-300
Source: MDPI journal article supplement (doi:10.3390/biomedicines9070766), 2021-07-01
Supplement: s1 [file s1]

## Supplementary Figures

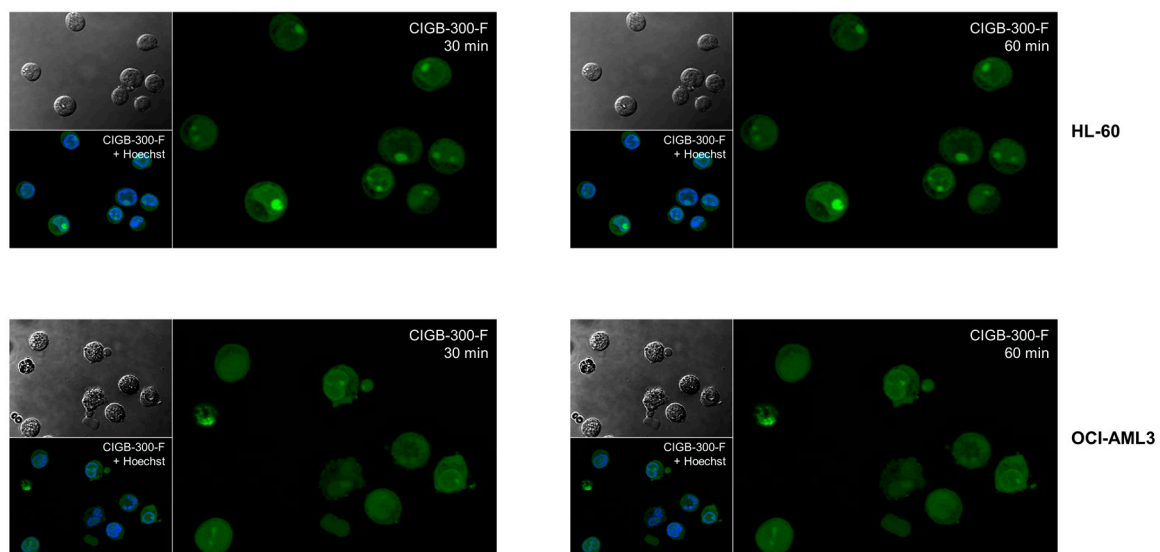

**Figure S1.** Subcellular distribution of CIGB-300 in AML cells after 30 and 60 min of incubation with 30  $\mu$ M of CIGB-300-F. A total of 5 optical fields were examined for each experimental condition in confocal microscopy experiment.

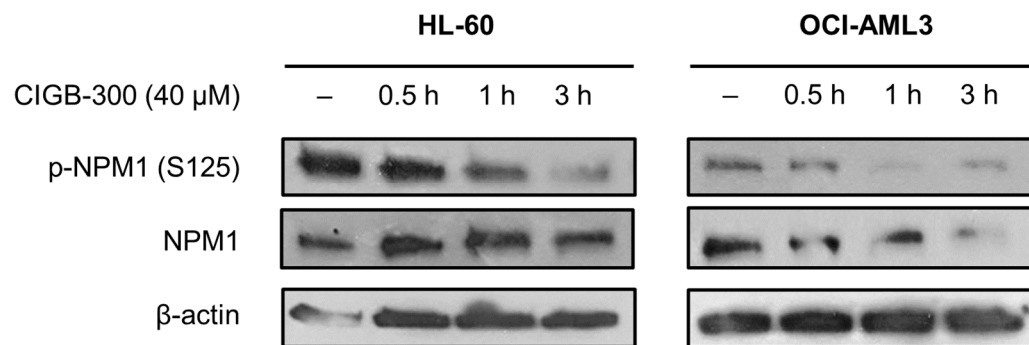

**Figure S2.** CIGB-300 peptide impairs CK2-mediated phosphorylation of NPM1 in AML cells. Cells treated with 40  $\mu$ M of CIGB-300 during the indicated times were analyzed by western blot using phospho-specific and total NPM1 antibodies.

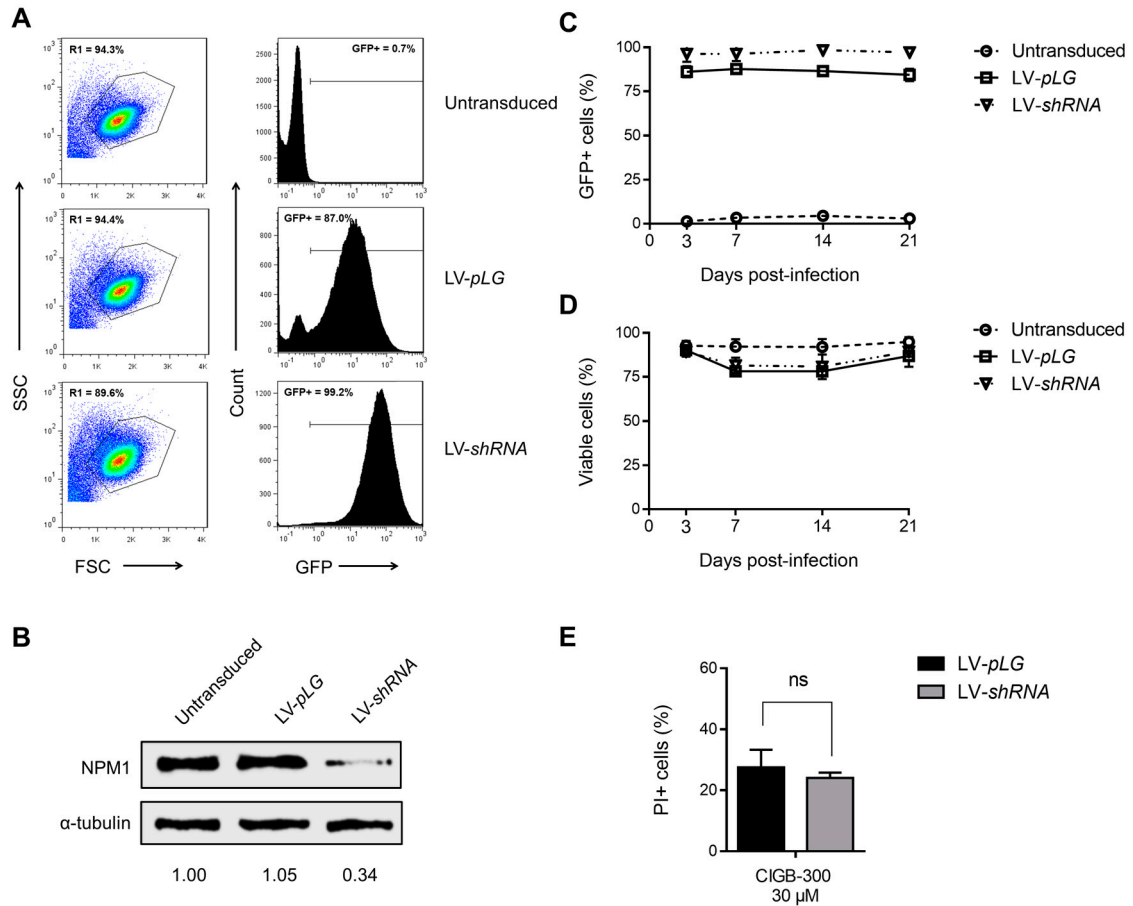

**Figure S3.** Lentiviral vector-mediated knock-down of NPM1 in THP-1 cells.: (a) Flow cytometry analysis of GFP expression in transduced cells at day 7 post-infection. Percentage of GFP+ cells was determined on live-cell population (R1 gate in dot plots); (b) Immunoblots from THP-1 transduced cells showing NPM1 protein knock-down in LV-shRNA infected cells; (c) GFP expression levels and (d) viability of transduced THP-1 cells were followed by flow cytometry during three weeks post-infection; (e) Sensibility of transduced cells toward the cytotoxic effect of CIGB-300 was evaluated by PI staining. Cells were incubated with 20 or 40 μM of CIGB-300 for 5 h, stained with PI solution and then analyzed by flow cytometry. Results from (c), (d) and (e) are shown as mean ± SD, n = 3. (ns) not significant.
