# Supplementary material for: Targeting of Protein Kinase CK2 in Acute Myeloid Leukemia Cells Using the Clinical-Grade Synthetic-Peptide CIGB-300
Source: Biomedicines. 2021 Jul 1;9(7):766. doi: 10.3390/biomedicines9070766 (PMC8301452; doi:10.3390/biomedicines9070766)
Supplement: Supplementary file 1 [file biomedicines-09-00766-s001.zip]

Archive with 7 entries (7 files):
- Supplementary Figures.pdf
- Table S1.pdf
- Table S2.xlsx
- Table S3.xlsx
- Table S4.xlsx
- Table S5.xlsx
- Table S6.xlsx
