# Supplementary material for: Targeting of Protein Kinase CK2 in Acute Myeloid Leukemia Cells Using the Clinical-Grade Synthetic-Peptide CIGB-300
Source: Biomedicines. 2021 Jul 1;9(7):766. doi: 10.3390/biomedicines9070766 (PMC8301452; doi:10.3390/biomedicines9070766)
Supplement: Supplementary file 1 [file biomedicines-09-00766-s001.zip › Table S3.xlsx]

## Sheet: HL-60 Phosphoproteome
Phosphoproteome identified in HL-60 cells
Protein	Protein names	Gene names	Amino acid	Position	Sequence window	Localization probability
A0A096LP25	Uncharacterized protein FLJ45252	AAK1	S	249	PGKLGGAVPFAPPEVSPEQAKTVQGGRKNQF	1
Q2M2I8	AP2-associated protein kinase 1	AAK1	T	606	PAIQAPVRQQPKVQTTPPPAVQGQKVGSLTP	0.997608
Q2M2I8	AP2-associated protein kinase 1	AAK1	T	620	TTPPPAVQGQKVGSLTPPSSPKTQRAGHRRI	0.999942
C9JG97		AAMP	S	14	__MLLSVPLTASRAPSSNPLPKADDLAQEME	0.997053
P49588	Alanine--tRNA ligase, cytoplasmic	AARS	S	399	KTLSRGRRILDRKIQSLGDSKTIPGDTAWLL	0.999818
Q4L235	Acyl-CoA synthetase family member 4	AASDH	S	724	DSVSQTNIQNLKGLNSPVLIGKSKDPSCVAK	1
Q9BZC7	ATP-binding cassette sub-family A member 2	ABCA2	S	1327	TTLEEVFLKVSEEDQSLENSEADVKESRKDV	1
Q9BZC7	ATP-binding cassette sub-family A member 2	ABCA2	S	1331	EVFLKVSEEDQSLENSEADVKESRKDVLPGA	1
Q8NE71	ATP-binding cassette sub-family F member 1	ABCF1	S	166	PKPAKPEKNRINKAVSEEQQPALKGKKGKEE	1
Q8NE71	ATP-binding cassette sub-family F member 1	ABCF1	S	140	KTKGGNVFAALIQDQSEEEEEEEKHPPKPAK	1
Q8NE71	ATP-binding cassette sub-family F member 1	ABCF1	S	22	QQPPEPEWIGDGESTSPSDKVVKKGKKDKKI	0.978602
Q8NE71	ATP-binding cassette sub-family F member 1	ABCF1	S	595	TRKQQKCRRKNQDEESQEAPELLKRPKEYTV	1
Q8NE71	ATP-binding cassette sub-family F member 1	ABCF1	Y	551	FKKMYQQKQKELLKQYEKQEKKLKELKAGGK	1
Q8IZP0	Abl interactor 1	ABI1	S	225	PNDYMTSPARLGSQHSPGRTASLNQRPRTHS	0.999939
Q9NYB9	Abl interactor 2	ABI2	S	183	MGGLPRTTPPTQKPPSPPMSGKGTLGRHSPY	0.998431
Q9NYB9	Abl interactor 2	ABI2	S	224	VPNDYVPSPTRNMAPSQQSPVRTASVNQRNR	0.795984
Q9NYB9	Abl interactor 2	ABI2	S	227	DYVPSPTRNMAPSQQSPVRTASVNQRNRTYS	0.999652
P00519	Tyrosine-protein kinase ABL1	ABL1	S	569	KGQGESDPLDHEPAVSPLLPRKERGPPEGGL	1
P00519	Tyrosine-protein kinase ABL1	ABL1	T	852	GKGSALGTPAAAEPVTPTSKAGSGAPGGTSK	0.870186
P42684	Abelson tyrosine-protein kinase 2	ABL2	S	655	KETCFTRDRKGGFFSSFMKKRNAPTPPKRSS	0.987282
P42684	Abelson tyrosine-protein kinase 2	ABL2	S	631	ASSGSPALPRKQRDKSPSSLLEDAKETCFTR	0.99558
P42684	Abelson tyrosine-protein kinase 2	ABL2	S	936	PVLPTTHNHKVPVLISPTLKHTPADVQLIGT	0.920481
Q15057	Arf-GAP with coiled-coil, ANK repeat and PH domain-containing protein 2	ACAP2	S	521	KYVERKFVDKYSISLSPPEQQKKFVSKSSEE	0.999999
Q9BWD1	Acetyl-CoA acetyltransferase, cytosolic	ACAT2	T	46	QDLGSTVIKEVLKRATVAPEDVSEVIFGHVL	0.986941
Q9H3P7	Golgi resident protein GCP60	ACBD3	S	43	GAEGAPLLPPPLPPPSPPGSGRGPGASGEQP	0.830549
E7EQT4	Apoptotic chromatin condensation inducer in the nucleus	ACIN1	S	450	GGLSPLSSPSDTKAESPAEKVPEESVLPLVQ	1
E7EQT4	Apoptotic chromatin condensation inducer in the nucleus	ACIN1	S	370	DRKKASLVALPEQTASEEETPPPLLTKEASS	0.998787
E7EQT4	Apoptotic chromatin condensation inducer in the nucleus	ACIN1	S	670	ERTSTSSSSVQARRLSQPESAEKHVTQRLQP	1
E7EQT4	Apoptotic chromatin condensation inducer in the nucleus	ACIN1	S	798	KISVVSATKGVPAGNSDTEGGQPGRKRRWGA	0.998903
E7EQT4	Apoptotic chromatin condensation inducer in the nucleus	ACIN1	S	689	SAEKHVTQRLQPERGSPKKCEAEEAEPPAAT	1
E7EQT4	Apoptotic chromatin condensation inducer in the nucleus	ACIN1	S	785	EKKESSLPKSFKRKISVVSATKGVPAGNSDT	0.999606
E7EQT4	Apoptotic chromatin condensation inducer in the nucleus	ACIN1	S	823	KRRWGASTATTQKKPSISITTESLKSLIPDI	0.994545
E7EQT4	Apoptotic chromatin condensation inducer in the nucleus	ACIN1	S	200	ERRSSRVRQARAAKLSEGSQPAEEEEDQETP	1
E7EQT4	Apoptotic chromatin condensation inducer in the nucleus	ACIN1	S	964	VSITIDDPVRTAQVPSPPRGKISNIVHISNL	0.999995
E7EQT4	Apoptotic chromatin condensation inducer in the nucleus	ACIN1	S	325	SHLARQQQEKEMKTTSPLEEEEREIKSSQGL	0.999784
E7EQT4	Apoptotic chromatin condensation inducer in the nucleus	ACIN1	S	943	VKKVTLGDTLTRRSISQQKSGVSITIDDPVR	0.999555
E7EQT4	Apoptotic chromatin condensation inducer in the nucleus	ACIN1	T	374	ASLVALPEQTASEEETPPPLLTKEASSPPPH	0.999098
E7EQT4	Apoptotic chromatin condensation inducer in the nucleus	ACIN1	S	200	ERRSSRVRQARAAKLSEGSQPAEEEEDQETP	1
E7EQT4	Apoptotic chromatin condensation inducer in the nucleus	ACIN1	S	203	SSRVRQARAAKLSEGSQPAEEEEDQETPSRN	1
E7EQT4	Apoptotic chromatin condensation inducer in the nucleus	ACIN1	S	346	EREIKSSQGLKEKSKSPSPPRLTEDRKKASL	0.999296
E7EQT4	Apoptotic chromatin condensation inducer in the nucleus	ACIN1	S	348	EIKSSQGLKEKSKSPSPPRLTEDRKKASLVA	0.987823
E7EQT4	Apoptotic chromatin condensation inducer in the nucleus	ACIN1	S	615	RSRSRSRSASSNSRKSLSPGVSRDSSTSYTE	1
E7EQT4	Apoptotic chromatin condensation inducer in the nucleus	ACIN1	S	617	RSRSRSASSNSRKSLSPGVSRDSSTSYTETK	0.999995
E7EQT4	Apoptotic chromatin condensation inducer in the nucleus	ACIN1	S	941	HEVKKVTLGDTLTRRSISQQKSGVSITIDDP	0.828024
E7EQT4	Apoptotic chromatin condensation inducer in the nucleus	ACIN1	S	943	VKKVTLGDTLTRRSISQQKSGVSITIDDPVR	0.999555
E7EQT4	Apoptotic chromatin condensation inducer in the nucleus	ACIN1	S	344	EEEREIKSSQGLKEKSKSPSPPRLTEDRKKA	0.999794
E7EQT4	Apoptotic chromatin condensation inducer in the nucleus	ACIN1	S	346	EREIKSSQGLKEKSKSPSPPRLTEDRKKASL	0.999296
E7EQT4	Apoptotic chromatin condensation inducer in the nucleus	ACIN1	S	348	EIKSSQGLKEKSKSPSPPRLTEDRKKASLVA	0.987823
E7EQT4	Apoptotic chromatin condensation inducer in the nucleus	ACIN1	S	615	RSRSRSRSASSNSRKSLSPGVSRDSSTSYTE	1
E7EQT4	Apoptotic chromatin condensation inducer in the nucleus	ACIN1	S	617	RSRSRSASSNSRKSLSPGVSRDSSTSYTETK	0.999995
P53396	ATP-citrate synthase	ACLY	S	481	PAKKAKPAMPQDSVPSPRSLQGKSTTLFSRH	0.945518
P53396	ATP-citrate synthase	ACLY	S	455	NASGSTSTPAPSRTASFSESRADEVAPAKKA	0.999845
O95573	Long-chain-fatty-acid--CoA ligase 3	ACSL3	S	683	SASLEKFEIPVKIRLSPEPWTPETGLVTDAF	0.953164
Q9NR19	Acetyl-coenzyme A synthetase, cytoplasmic	ACSS2	S	30	RGQEEAGAGGRARSWSPPPEVSRSAHVPSLQ	0.999998
P60709	Actin, cytoplasmic 1;Actin, cytoplasmic 1, N-terminally processed	ACTB	S	14	__MDDDIAALVVDNGSGMCKAGFAGDDAPRA	1
P63261	Actin, cytoplasmic 1;Actin, cytoplasmic 1, N-terminally processed;Actin, cytoplasmic 2;Actin, cytoplasmic 2, N-terminally processed;Actin, alpha skeletal muscle;Actin, alpha cardiac muscle 1;Actin, gamma-enteric smooth muscle;Actin, aortic smooth muscle	ACTB;ACTG1;ACTA1;ACTC1;ACTG2;ACTA2	S	60	VGMGQKDSYVGDEAQSKRGILTLKYPIEHGI	1
P63261	Actin, cytoplasmic 1;Actin, cytoplasmic 1, N-terminally processed;Actin, cytoplasmic 2;Actin, cytoplasmic 2, N-terminally processed;Actin, alpha skeletal muscle;Actin, alpha cardiac muscle 1;Actin, gamma-enteric smooth muscle;Actin, aortic smooth muscle	ACTB;ACTG1;ACTA1;ACTC1;ACTG2;ACTA2	S	323	GIADRMQKEITALAPSTMKIKIIAPPERKYS	0.998517
P63261	Actin, cytoplasmic 1;Actin, cytoplasmic 1, N-terminally processed;Actin, cytoplasmic 2;Actin, cytoplasmic 2, N-terminally processed;POTE ankyrin domain family member E	ACTB;ACTG1;POTEE	T	229	EKLCYVALDFEQEMATAASSSSLEKSYELPD	0.99894
P63261	Actin, cytoplasmic 1;Actin, cytoplasmic 1, N-terminally processed;Actin, cytoplasmic 2;Actin, cytoplasmic 2, N-terminally processed;POTE ankyrin domain family member E	ACTB;ACTG1;POTEE	Y	218	MAEREIVRDIKEKLCYVALDFEQEMATAASS;TAEREIVRDIKEKLCYVALDFEQEMATAASS	0.999203
P63261	Actin, cytoplasmic 2;Actin, cytoplasmic 2, N-terminally processed	ACTG1	S	14	__MEEEIAALVIDNGSGMCKAGFAGDDAPRA	1
O96019	Actin-like protein 6A	ACTL6A	S	233	VPPYMIASKEAVREGSPANWKRKEKLPQVTR	1
Q08043	Alpha-actinin-3	ACTN3	T	221	DYAKLRKDDPIGNLNTAFEVAEKYLDIPKML	1
Q9NZ32	Actin-related protein 10	ACTR10	S	414	FDVGKTQPPLMKRAFSTEK____________	0.890707
P61160	Actin-related protein 2	ACTR2	T	117	TRNCKILLTEPPMNPTKNREKIVEVMFETYQ	1
P61158	Actin-related protein 3	ACTR3	S	418	IGPSICRHNPVFGVMS_______________	0.967724
P78536	Disintegrin and metalloproteinase domain-containing protein 17	ADAM17	S	819	EKAASFKLQRQNRVDSKETEC__________	1
Q6UY14	ADAMTS-like protein 4	ADAMTSL4	S	291	RASPQPRRPSSQGWASPQVAGRRPDPFPSVP	0.976596
P55265	Double-stranded RNA-specific adenosine deaminase	ADAR	T	601	HYSTEKESEKTAESQTPTPSATSFFSGKSPV	0.999987
P78563	Double-stranded RNA-specific editase 1	ADARB1	S	26	SSSTDVKENRNLDNVSPKDGSTPGPGEGSQL	1
P35611	Alpha-adducin	ADD1	S	586	ELEEYRREVERKQKGSEENLDEAREQKEKSP	1
P35611	Alpha-adducin	ADD1	S	12	____MNGDSRAAVVTSPPPTTAPHKERYFDR	0.974712
P35611	Alpha-adducin	ADD1	S	358	LLNPEKYKAKSRSPGSPVGEGTGSPPKWQIG	0.999998
P35611	Alpha-adducin	ADD1	S	465	SGRGDEASEEGQNGSSPKSKTKWTKEDGHRT	0.866947
P35611	Alpha-adducin	ADD1	S	355	NLVLLNPEKYKAKSRSPGSPVGEGTGSPPKW	0.99787
P35611	Alpha-adducin	ADD1	S	358	LLNPEKYKAKSRSPGSPVGEGTGSPPKWQIG	0.999998
Q9UEY8	Alpha-adducin;Beta-adducin;Gamma-adducin	ADD1;ADD2;ADD3	S	693	PGKSPSKKKKKFRTPSFLKKSKKKSDS____;PSKSPSKKKKKFRTPSFLKKNKKKEKVEA__;PSKSPSKKKKKFRTPSFLKKSKKKEKVES__	0.999194
P35612	Beta-adducin	ADD2	S	592	LELDGEKETAPEEPGSPAKSAPASPVQSPAK	1
P35612	Beta-adducin	ADD2	S	600	TAPEEPGSPAKSAPASPVQSPAKEAETKSPL	0.999908
P35612	Beta-adducin	ADD2	S	613	PASPVQSPAKEAETKSPLVSPSKSLEEGTKK	1
P35612	Beta-adducin	ADD2	S	596	GEKETAPEEPGSPAKSAPASPVQSPAKEAET	1
P35612	Beta-adducin	ADD2	S	600	TAPEEPGSPAKSAPASPVQSPAKEAETKSPL	0.999908
P35612	Beta-adducin	ADD2	S	613	PASPVQSPAKEAETKSPLVSPSKSLEEGTKK	1
P35612	Beta-adducin	ADD2	S	617	VQSPAKEAETKSPLVSPSKSLEEGTKKTETS	0.983297
Q9UEY8	Gamma-adducin	ADD3	S	673	IEITIKSPEKIEEVLSPEGSPSKSPSKKKKK	0.999995
Q9UEY8	Gamma-adducin	ADD3	S	677	IKSPEKIEEVLSPEGSPSKSPSKKKKKFRTP	0.967849
Q9UEY8	Gamma-adducin	ADD3	S	423	ATVTAFSFEDDTVPLSPLKYMAQRQQREKTR	0.996872
Q9UEY8	Gamma-adducin	ADD3	S	461	YMKVNVPEESRNGETSPRTKITWMKAEDSSK	0.947419
Q9UEY8	Gamma-adducin	ADD3	T	12	____MSSDASQGVITTPPPPSMPHKERYFDR	0.999612
Q9UEY8	Gamma-adducin	ADD3	S	673	IEITIKSPEKIEEVLSPEGSPSKSPSKKKKK	0.999995
Q9UEY8	Gamma-adducin	ADD3	S	677	IKSPEKIEEVLSPEGSPSKSPSKKKKKFRTP	0.967849
Q9UEY8	Gamma-adducin	ADD3	S	681	EKIEEVLSPEGSPSKSPSKKKKKFRTPSFLK	0.856021
Q9UEY8	Gamma-adducin	ADD3	S	673	IEITIKSPEKIEEVLSPEGSPSKSPSKKKKK	0.999995
Q9UEY8	Gamma-adducin	ADD3	S	677	IKSPEKIEEVLSPEGSPSKSPSKKKKKFRTP	0.967849
Q9UEY8	Gamma-adducin	ADD3	S	681	EKIEEVLSPEGSPSKSPSKKKKKFRTPSFLK	0.856021
P35318	ADM;Adrenomedullin;Proadrenomedullin N-20 terminal peptide	ADM	S	153	RSKISPQGYGRRRRRSLPEAGPGRTLVSSKP	1
Q9H2P0	Activity-dependent neuroprotector homeobox protein	ADNP	S	953	TIHLTEEPTKLMHNASDSEVDQDDVVEWKDG	1
Q9H2P0	Activity-dependent neuroprotector homeobox protein	ADNP	S	955	HLTEEPTKLMHNASDSEVDQDDVVEWKDGAS	1
Q9H2P0	Activity-dependent neuroprotector homeobox protein	ADNP	S	921	DNPEEHVLKVIPEDASESEEKLDQKEDGSKY	0.988395
Q9H2P0	Activity-dependent neuroprotector homeobox protein	ADNP	S	953	TIHLTEEPTKLMHNASDSEVDQDDVVEWKDG	1
Q9H2P0	Activity-dependent neuroprotector homeobox protein	ADNP	S	955	HLTEEPTKLMHNASDSEVDQDDVVEWKDGAS	1
Q6IQ32	ADNP homeobox protein 2	ADNP2	T	866	SLVPVYVKVRPQAEGTPGSTGKRVSTCPFCF	0.977872
P25098	Beta-adrenergic receptor kinase 1	ADRBK1	S	670	QQLVQRVPKMKNKPRSPVVELSKVPLVQRGS	1
P25098	Beta-adrenergic receptor kinase 1	ADRBK1	S	685	SPVVELSKVPLVQRGSANGL___________	1
P30566	Adenylosuccinate lyase	ADSL	S	9	_______MAAGGDHGSPDSYRSPLASRYASP	0.999862
P51825	AF4/FMR2 family member 1	AFF1	S	750	RKDRLPLPLRDTKLLSPLRDTPPPQSLMVKI	0.999881
P51825	AF4/FMR2 family member 1	AFF1	S	588	APPEAPHPGKRSCQKSPAQQEPPQRQTVGTK	1
Q9UHB7	AF4/FMR2 family member 4	AFF4	S	1058	SPGLGSKAVGMPSPVSPKLSPGNSGNYSSGA	0.993994
Q9UHB7	AF4/FMR2 family member 4	AFF4	S	814	ESSKQSAAKEKDLLPSPAGPVPSKDPKTEHG	0.999968
Q9UHB7	AF4/FMR2 family member 4	AFF4	S	1043	LTEHLKNSYNNSQAPSPGLGSKAVGMPSPVS	0.999987
Q6ULP2	Aftiphilin	AFTPH	T	617	AWQSHRTDENIDTPGTPKTHSVPSATSKGAV	0.997064
Q99490-2	Arf-GAP with GTPase, ANK repeat and PH domain-containing protein 2	AGAP2	S	571	SLQCCESSKVKLRTDSQSEAVAIQAIRNAKG	0.766406
Q99490-2	Arf-GAP with GTPase, ANK repeat and PH domain-containing protein 2	AGAP2	S	821	ATTPSITATPSPRRRSSAASVGRADAPVALV	0.999556
Q99490-2	Arf-GAP with GTPase, ANK repeat and PH domain-containing protein 2	AGAP2	S	822	TTPSITATPSPRRRSSAASVGRADAPVALV_	0.977132
Q96P47	Arf-GAP with GTPase, ANK repeat and PH domain-containing protein 3	AGAP3	S	443	GKRLPRATPATAPGTSPRANGLSVERSNTQL	0.954615
Q96P47	Arf-GAP with GTPase, ANK repeat and PH domain-containing protein 3	AGAP3	S	538	PAEVLSSSPKLDPPPSPHSNRKKHRRKKSTG	0.950334
Q96MI9	Cytosolic carboxypeptidase 4	AGBL1	S	524	QRIRIFEDIRRLIQPSDVINKVVFSLDEPWP	1
P52594	Arf-GAP domain and FG repeat-containing protein 1	AGFG1	S	181	DSAPTLHLNKGTPSQSPVVGRSQGQQQEKKQ	0.999837
P52594	Arf-GAP domain and FG repeat-containing protein 1	AGFG1	S	181	DSAPTLHLNKGTPSQSPVVGRSQGQQQEKKQ	0.999837
P52594	Arf-GAP domain and FG repeat-containing protein 1	AGFG1	T	177	SLLGDSAPTLHLNKGTPSQSPVVGRSQGQQQ	0.999969
Q53EU6	Glycerol-3-phosphate acyltransferase 3	AGPAT9	S	68	IEKGTPKESILKNSASVGIIQRDESPMEKGL	0.999595
O00116	Alkyldihydroxyacetonephosphate synthase, peroxisomal	AGPS	S	65	REALSTNECKARRAASAATAAPTATPAAQES	0.997632
Q8WYP5	Protein ELYS	AHCTF1	S	1283	EWLKSKDRTTSFFLNSPEKEHQEMDEGSQSL	1
Q8WYP5	Protein ELYS	AHCTF1	S	1232	PSPGRSPQRLKETRISFVEEDVHPKWIPGAA	0.769291
Q8WYP5	Protein ELYS	AHCTF1	S	1513	KESVDLPEEKLPISDSPPDTQEIHVIEQEKL	0.999973
Q8WYP5	Protein ELYS	AHCTF1	T	1369	QTEKDGDKDVFASEVTPSDLQKQMGNLEDAE	0.992486
Q8WYP5	Protein ELYS	AHCTF1	T	1229	SPSPSPGRSPQRLKETRISFVEEDVHPKWIP	0.785698
Q8N157	Jouberin	AHI1	S	1123	SETLYQELPPEIKERSPPLSPEEKTKIEKSP	1
Q8N157	Jouberin	AHI1	S	1127	YQELPPEIKERSPPLSPEEKTKIEKSPAPQK	1
Q09666	Neuroblast differentiation-associated protein AHNAK	AHNAK	S	5110	FDIKSPKFKAEAPLPSPKLEGELQAPDLELS	1
Q09666	Neuroblast differentiation-associated protein AHNAK	AHNAK	S	5752	SGSKGDLKSSKASLGSLEGEAEAEASSPKGK	1
Q09666	Neuroblast differentiation-associated protein AHNAK	AHNAK	S	5763	ASLGSLEGEAEAEASSPKGKFSLFKSKKPRH	0.941122
Q09666	Neuroblast differentiation-associated protein AHNAK	AHNAK	S	177	VDVTGREGAKDIDISSPEFKIKIPRHELTEI	0.999767
Q09666	Neuroblast differentiation-associated protein AHNAK	AHNAK	S	5830	GKHGKLKFGTFGGLGSKSKGHYEVTGSDDET	0.999985
Q09666	Neuroblast differentiation-associated protein AHNAK	AHNAK	S	93	GHHTVGLKLHRKGDRSPEPGQTWTREVFSSC	1
Q09666	Neuroblast differentiation-associated protein AHNAK	AHNAK	S	5731	KFNFSKPKGKGGVTGSPEASISGSKGDLKSS	0.999996
Q09666	Neuroblast differentiation-associated protein AHNAK	AHNAK	S	5739	GKGGVTGSPEASISGSKGDLKSSKASLGSLE	0.828623
Q09666	Neuroblast differentiation-associated protein AHNAK	AHNAK	S	5841	GGLGSKSKGHYEVTGSDDETGKLQGSGVSLA	0.999984
Q09666	Neuroblast differentiation-associated protein AHNAK	AHNAK	S	5552	AAPDISVKGPAFNMASPESDFGINLKGPKIK	1
Q09666	Neuroblast differentiation-associated protein AHNAK	AHNAK	S	559	ETPNLEGTLTGPRLGSPSGKTGTCRISMSEV	0.996514
Q09666	Neuroblast differentiation-associated protein AHNAK	AHNAK	S	5031	GKGKKSKFKMPKIHMSGPKIKAKKQGFDLNV	1
Q09666	Neuroblast differentiation-associated protein AHNAK	AHNAK	S	511	QKPKISMQDVDLSLGSPKLKGDIKVSAPGVQ	0.999868
Q09666	Neuroblast differentiation-associated protein AHNAK	AHNAK	S	216	SGKTVIRLPSGSGAASPTGSAVDIRAGAISA	0.998066
Q09666	Neuroblast differentiation-associated protein AHNAK	AHNAK	S	5851	YEVTGSDDETGKLQGSGVSLASKKSRLSSSS	0.980498
Q09666	Neuroblast differentiation-associated protein AHNAK	AHNAK	S	3411	GKVKGSKFKMPFLSISSPKVSMPDVELNLKS	0.936671
Q09666	Neuroblast differentiation-associated protein AHNAK	AHNAK	S	3412	KVKGSKFKMPFLSISSPKVSMPDVELNLKSP	0.92254
Q09666	Neuroblast differentiation-associated protein AHNAK	AHNAK	S	4908	EGPDAKLSGPSLKMPSLEISAPKVTAPDVDL	0.999968
Q09666	Neuroblast differentiation-associated protein AHNAK	AHNAK	S	1068	PKFKMPEMHFRAPKMSLPDVDLDLKGPKMKG	1
Q09666	Neuroblast differentiation-associated protein AHNAK	AHNAK	S	135	EYQRIYTTKIKPRLKSEDGVEGDLGETQSRT	1
Q09666	Neuroblast differentiation-associated protein AHNAK	AHNAK	S	4516	KLKGPKFKMPDVHFKSPQISMSDIDLNLKGP	1
Q09666	Neuroblast differentiation-associated protein AHNAK	AHNAK	S	4960	KGPKVEAPSLDVHMDSPDINIEGPDVKIPKF	0.999776
Q09666	Neuroblast differentiation-associated protein AHNAK	AHNAK	T	4430	KGPEIDIKGPSLDIDTPDVNIEGPEGKLKGP	1
Q09666	Neuroblast differentiation-associated protein AHNAK	AHNAK	T	4100	PKADIDVSGPKVDIDTPDIDIHGPEGKLKGP	1
Q09666	Neuroblast differentiation-associated protein AHNAK	AHNAK	T	3716	KGPEVDIKGPKVDIDTPDINIEGSEGKFKGP	1
Q09666	Neuroblast differentiation-associated protein AHNAK	AHNAK	T	4766	KGPEADIKGPKVDINTPDVDVHGPDWHLKMP	1
Q09666	Neuroblast differentiation-associated protein AHNAK	AHNAK	T	4564	KGPKVDVKGPKVGIDTPDIDIHGPEGKLKGP	1
Q09666	Neuroblast differentiation-associated protein AHNAK	AHNAK	T	3366	RFKLPKFNFSGSKVQTPEVDVKGKKPDIDIT	1
Q09666	Neuroblast differentiation-associated protein AHNAK	AHNAK	S	5752	SGSKGDLKSSKASLGSLEGEAEAEASSPKGK	1
Q09666	Neuroblast differentiation-associated protein AHNAK	AHNAK	S	5763	ASLGSLEGEAEAEASSPKGKFSLFKSKKPRH	0.941122
Q09666	Neuroblast differentiation-associated protein AHNAK	AHNAK	S	5731	KFNFSKPKGKGGVTGSPEASISGSKGDLKSS	0.999996
Q09666	Neuroblast differentiation-associated protein AHNAK	AHNAK	S	5739	GKGGVTGSPEASISGSKGDLKSSKASLGSLE	0.828623
P55008	Allograft inflammatory factor 1	AIF1	S	39	LDEINKQFLDDPKYSSDEDLPSKLEGFKEKY	0.99993
O95831	Apoptosis-inducing factor 1, mitochondrial	AIFM1	S	118	GLTPEQKQKKAALSASEGEEVPQDKAPSHVP	0.999616
O95831	Apoptosis-inducing factor 1, mitochondrial	AIFM1	S	292	VKSRTTLFRKIGDFRSLEKISREVKSITIIG	1
Q9Y4K1	Absent in melanoma 1 protein	AIM1	S	329	KAKEMEQPEKKVMPNSPQNGVLVKETAIETK	1
Q96IF1	LIM domain-containing protein ajuba	AJUBA	S	119	SLPPDFRLEPTAPALSPRSSFASSSASDASK	0.999996
P54819	Adenylate kinase 2, mitochondrial;Adenylate kinase 2, mitochondrial, N-terminally processed;Adenylate kinase 2, mitochondrial	AK2	S	176	EPMKDDITGEPLIRRSDDNEKALKIRLQAYH	0.999993
Q92667	A-kinase anchor protein 1, mitochondrial	AKAP1	S	592	SMDSVDSCCSLKKTESFQNAQAGSNPKKVDL	0.996661
Q92667	A-kinase anchor protein 1, mitochondrial	AKAP1	S	445	PPPKTYVSCLKSLLSSPTKDSKPNISAHHIS	0.979955
Q92667	A-kinase anchor protein 1, mitochondrial	AKAP1	T	533	DSCTETSSSPRDKAITPPLPESTVPFSNGVL	1
O43572	A-kinase anchor protein 10, mitochondrial	AKAP10	S	52	KTSDVKSIKASISVHSPQKSTKNHALLEAAG	0.996298
O43572	A-kinase anchor protein 10, mitochondrial	AKAP10	S	187	HSLNTVKQSSLAEPVSPSKKHETTASFLTDS	0.99838
Q9UKA4	A-kinase anchor protein 11	AKAP11	S	18	TFRNNHMKTKASVRKSFSEDVFQSVKSLLQS	0.971345
Q9UKA4	A-kinase anchor protein 11	AKAP11	T	981	VYKESLPVSGEESQLTPEKSPKFPDSQNQLT	0.999996
Q9Y2D5	A-kinase anchor protein 2	AKAP2	S	748	EEELKRQRQVLQSTQSPRTKNAPSLPSRTCY	0.993864
Q9Y2D5	A-kinase anchor protein 2	AKAP2	S	393	GPPEDSGASAAKGQKSPGALETPSAAGSQGN	1
Q9Y2D5	A-kinase anchor protein 2	AKAP2	S	778	YKTAPGKIEKVKPPPSPTTEGPSLQPDLAPE	0.817468
Q9ULX6	A-kinase anchor protein 8-like	AKAP8L	S	552	KKLERYLKGENPFTDSPEEEKEQEEAEGGAL	0.999943
Q9ULX6	A-kinase anchor protein 8-like	AKAP8L	S	326	EATEGLEGTEAVEKGSRVDGEDEEGKEDGRE	1
Q9ULX6	A-kinase anchor protein 8-like	AKAP8L	S	283	TADFRTKKKKRKQGGSPDEPDSKATRTDCSD	1
Q53H80	Akirin-2	AKIRIN2	S	21	TLKRTLDFDPLLSPASPKRRRCAPLSAPTSA	0.998216
Q7Z591	AT-hook-containing transcription factor	AKNA	S	1193	PSLPLFSEKSKTTKDSPQAARDGKRGVGSAG	1
Q7Z591	AT-hook-containing transcription factor	AKNA	S	1377	GPTSAQPAAKWPPTASPPPARRHRHSIQLDL	0.799819
Q7Z591	AT-hook-containing transcription factor	AKNA	S	997	TEPSTPRSQAQRYLSSPSGPLRQRAPNFSLE	0.784685
Q96B36	Proline-rich AKT1 substrate 1	AKT1S1	S	88	TAARPPAPPPAPQPPSPTPSPPRPTLAREDN	0.9931
Q96B36	Proline-rich AKT1 substrate 1	AKT1S1	S	92	PPAPPPAPQPPSPTPSPPRPTLAREDNEEDE	0.906134
P51648	Fatty aldehyde dehydrogenase	ALDH3A2	S	293	DYERIINLRHFKRILSLLEGQKIAFGGETDE	1
P04075	Fructose-bisphosphate aldolase A;Fructose-bisphosphate aldolase	ALDOA	S	336	LKAAQEEYVKRALANSLACQGKYTPSGQAGA	1
P04075	Fructose-bisphosphate aldolase A;Fructose-bisphosphate aldolase	ALDOA	S	309	KPWALTFSYGRALQASALKAWGGKKENLKAA	1
P04075	Fructose-bisphosphate aldolase A;Fructose-bisphosphate aldolase	ALDOA	S	36	HRIVAPGKGILAADESTGSIAKRLQSIGTEN	0.848301
P04075	Fructose-bisphosphate aldolase A;Fructose-bisphosphate aldolase	ALDOA	S	39	VAPGKGILAADESTGSIAKRLQSIGTENTEE	0.997128
P04075	Fructose-bisphosphate aldolase A;Fructose-bisphosphate aldolase	ALDOA	S	46	LAADESTGSIAKRLQSIGTENTEENRRFYRQ	1
P04075	Fructose-bisphosphate aldolase A;Fructose-bisphosphate aldolase	ALDOA	T	37	RIVAPGKGILAADESTGSIAKRLQSIGTENT	0.750977
P04075	Fructose-bisphosphate aldolase A;Fructose-bisphosphate aldolase;Fructose-bisphosphate aldolase C	ALDOA;ALDOC	S	176	ALAILENANVLARYASICQQNGIVPIVEPEI;ALAIMENANVLARYASICQQNGIVPIVEPEI	0.978361
P09972	Fructose-bisphosphate aldolase C;Fructose-bisphosphate aldolase	ALDOC	S	39	VAPGKGILAADESVGSMAKRLSQIGVENTEE	0.999638
Q6P6C2	RNA demethylase ALKBH5	ALKBH5	S	64	EPYPVSGAKRKYQEDSDPERSDYEEQQLQKE	0.999331
Q8TCU4	Alstrom syndrome protein 1	ALMS1	S	1218	QTLPGSHIPEEAQKVSPVLGPADQKTGTPTP	1
Q8TCU4	Alstrom syndrome protein 1	ALMS1	T	2028	ATLSSYSQIEKPKISTVIGPNDQKTPSQTAF	0.999132
P17707	S-adenosylmethionine decarboxylase proenzyme;S-adenosylmethionine decarboxylase alpha chain;S-adenosylmethionine decarboxylase beta chain	AMD1	T	283	IRKVVEVFKPGKFVTTLFVNQSSKCRTVLAS	0.852246
Q9UKV5	E3 ubiquitin-protein ligase AMFR	AMFR	S	542	EGETSAQTERVPLDLSPRLEETLDFGEVEVE	1
Q01433	AMP deaminase 2	AMPD2	S	190	PDILLRAKQDFLKTDSDSDLQLYKEQGEGQG	1
Q9H1A4	Anaphase-promoting complex subunit 1	ANAPC1	S	688	DRLAWTRNFDFEGSLSPVIAPKKARPSETGS	0.999209
Q9H1A4	Anaphase-promoting complex subunit 1	ANAPC1	S	1347	GHRRFQTGMHREKHKSPSYQIKEGDTINVDV	0.97852
Q9UJX6	Anaphase-promoting complex subunit 2	ANAPC2	S	314	WLGKVFLQDGPARPASPEAGNTLRRWRCHVQ	0.990538
Q9UJX5	Anaphase-promoting complex subunit 4	ANAPC4	S	777	EEASNKPVKIKEEVLSESEAENQQAGAAALA	0.947028
Q01484	Ankyrin-2	ANK2	S	3802	AMIVPSSPSKTPEEVSTPAEEEKLYLQTPTS	0.832164
Q01484	Ankyrin-2	ANK2	T	3797	SETQKAMIVPSSPSKTPEEVSTPAEEEKLYL	0.832164
Q8IWZ3	Ankyrin repeat and KH domain-containing protein 1	ANKHD1	S	1679	VSLPLSSPNIKLNLTSPKRGQKREEGWKEVV	0.977664
Q9P2G1	Ankyrin repeat and IBR domain-containing protein 1	ANKIB1	S	737	QEFLASVARGVAPADSPEAPRRSFAGGTWDW	1
Q86XL3	Ankyrin repeat and LEM domain-containing protein 2	ANKLE2	S	528	PRDPVLTLRAFAGPLSPAKAEDFRKLWKTPP	1
Q86XL3	Ankyrin repeat and LEM domain-containing protein 2	ANKLE2	S	662	SLEEIKNRQNAARNNSPPTVGAFGHTRCSAF	0.998849
Q86XL3	Ankyrin repeat and LEM domain-containing protein 2	ANKLE2	S	268	ICDYFPSPSKTSLPLSPVKTAPLFSNDRLKD	1
Q6UB99	Ankyrin repeat domain-containing protein 11	ANKRD11	S	505	EDDRDSLGSSGCLKGSPLVLKDPSLFSSLSA	1
Q6UB98-2	Ankyrin repeat domain-containing protein 12	ANKRD12	S	1143	TKEKQPKDAVSNRSQSVDTKNVMTLGKSSFV	1
Q6ZTN6-3	Ankyrin repeat domain-containing protein 13D	ANKRD13D	S	552	LQESLQLSTEPRGPGSPPRTPPAPGPPSFEE	1
Q6ZTN6-3	Ankyrin repeat domain-containing protein 13D	ANKRD13D	T	556	LQLSTEPRGPGSPPRTPPAPGPPSFEEQLRL	0.999999
O75179	Ankyrin repeat domain-containing protein 17	ANKRD17	S	1709	GPSPLSSPNGKLTVASPKRGQKREEGWKEVV	1
O75179	Ankyrin repeat domain-containing protein 17	ANKRD17	S	1696	EGTSNSLSTCTKSGPSPLSSPNGKLTVASPK	0.993409
O75179	Ankyrin repeat domain-containing protein 17	ANKRD17	S	1700	NSLSTCTKSGPSPLSSPNGKLTVASPKRGQK	0.828985
Q9UPS8	Ankyrin repeat domain-containing protein 26	ANKRD26	S	630	KSTEKEKRTSKESVNSPVFGKASLLTGGLLQ	0.999999
Q9BXX3	Ankyrin repeat domain-containing protein 30A	ANKRD30A	S	839	THQKEIDKINGKLEESPDNDGFLKAPCRMKV	1
Q9BXX3	Ankyrin repeat domain-containing protein 30A	ANKRD30A	Y	204	EFLLIKNANANAVNKYKCTALMLAVCHGSSE	1
Q9BXX2	Ankyrin repeat domain-containing protein 30B	ANKRD30B	T	1138	NAELQMTLKLKQKTVTKRASQYREQLKVLTA	0.957982
Q9BXX2	Ankyrin repeat domain-containing protein 30B	ANKRD30B	Y	1144	TLKLKQKTVTKRASQYREQLKVLTAENTMLT	0.99039
Q6NXT1	Ankyrin repeat domain-containing protein 54	ANKRD54	S	63	GGGAGLSGRASGGAQSPLRYLHVLWQQDAEP	1
Q92625	Ankyrin repeat and SAM domain-containing protein 1A	ANKS1A	S	624	PTSKPKAELKLSRSLSKSDSDLLTCSPTEDA	0.99954
Q9H8Y5	Ankyrin repeat and zinc finger domain-containing protein 1	ANKZF1	S	398	KICRDEKEALGQNEESPKQGSGSEGEDGFQV	1
Q9H8Y5	Ankyrin repeat and zinc finger domain-containing protein 1	ANKZF1	S	675	LAAERRLAAQLGAPTSPIPDSAIVNTRRCWS	0.809134
Q9NQW6	Actin-binding protein anillin	ANLN	S	182	ESSLFSPMPSEEKAASPPRPLLSNASATPVG	1
Q9NQW6	Actin-binding protein anillin	ANLN	S	792	LNKLKNEGPQRKNKASPQSEFMPSKGSVTLS	0.999972
Q9NQW6	Actin-binding protein anillin	ANLN	S	642	STPRLELKDTSRSDESPKPGKFQRTRVPRAE	0.999765
Q9NQW6	Actin-binding protein anillin	ANLN	S	54	RARQPLSEASNQQPLSGGEEKSCTKPSPSKK	0.999997
Q9NQW6	Actin-binding protein anillin	ANLN	S	323	SCEGQNPELLPKTPISPLKTGVSKPIVKSTL	1
P39687	Acidic leucine-rich nuclear phosphoprotein 32 family member A	ANP32A	S	27	RNRTPSDVKELVLDNSRSNEGKLEGLTDEFE	0.903052
Q92688	Acidic leucine-rich nuclear phosphoprotein 32 family member B	ANP32B	T	244	EEEEEGGKGEKRKRETDDEGEDD________	1
O00203	AP-3 complex subunit beta-1	AP3B1	S	276	KEGDELEDNGKNFYESDDDQKEKTDKKKKPY	1
Q92870	Amyloid beta A4 precursor protein-binding family B member 2	APBB2	S	123	RKAAEQGQQDPNKNLSPTAVINITSEKLEGK	0.999759
P13798	Acylamino-acid-releasing enzyme	APEH	S	187	KAESFFQTKALDVSASDDEIARLKKPDQAIK	0.999571
Q9BZZ5	Apoptosis inhibitor 5	API5	S	464	VEIGQKRASEDTTSGSPPKKSSAGPKRDARQ	0.998831
Q96GX9	Methylthioribulose-1-phosphate dehydratase	APIP	S	87	DMFVCDINEKDISGPSPSKKLKKSQCTPLFM	0.966207
Q0VD83	Apolipoprotein B receptor	APOBR	T	563	SVTKGQGPELMGGAQTPTKQPEEREAGEVEL	0.996825
Q6UXV4	MICOS complex subunit MIC27	APOOL	S	203	KEESLPKPKEKTKLGSSSEIEVPAKTTHVLK	0.997211
P10398	Serine/threonine-protein kinase A-Raf	ARAF	S	257	DAAGSRGGSDGTPRGSPSPASVSSGRKSPHS	0.994878
P10398	Serine/threonine-protein kinase A-Raf	ARAF	S	186	PSNRPLNELLTPQGPSPRTQHCDPEHFPFPA	0.997757
Q96P48	Arf-GAP with Rho-GAP domain, ANK repeat and PH domain-containing protein 1	ARAP1	S	1271	VKKHQAMEAMLLYLASRVGDTKHGMMKFRED	0.998658
P18085	ADP-ribosylation factor 4	ARF4	S	147	NAMAISEMTDKLGLQSLRNRTWYVQATCATQ	1
Q9Y6D5	Brefeldin A-inhibited guanine nucleotide-exchange protein 2	ARFGEF2	S	1782	KIWIPEEPSQVPAALSPVW____________	1
Q9Y6D5	Brefeldin A-inhibited guanine nucleotide-exchange protein 2	ARFGEF2	S	277	KVSTENGDAPRERGSSLSGTDDGAQEVVKDI	0.875955
Q5TH69	Brefeldin A-inhibited guanine nucleotide-exchange protein 3	ARFGEF3	S	1991	SLSLKAGGGDLLLPPSPKVEKKDPSRKKEWW	1
Q9NWB6	Arginine and glutamate-rich protein 1	ARGLU1	S	94	PDRIDIFGRTVSKRSSLDEKQKREEEEKKAE	0.983733
Q07960	Rho GTPase-activating protein 1	ARHGAP1	S	51	DEMPDFPKSDDSKSSSPELVTHLKWDDPYYD	0.997753
Q53QZ3	Rho GTPase-activating protein 15	ARHGAP15	S	264	NRVKSRLKKFITRRPSLKTLQEKGLIKDQIF	0.991253
Q53QZ3	Rho GTPase-activating protein 15	ARHGAP15	S	64	VGKVTEPISRHRRNHSQHILKDVIPPLEQLM	1
Q53QZ3	Rho GTPase-activating protein 15	ARHGAP15	S	43	IKNANSHHDRLSQSKSMILTDVGKVTEPISR	1
P42331	Rho GTPase-activating protein 25	ARHGAP25	S	362	RDHEVLFPKSKDIPLSPPAQKNDPKKAPVAR	1
P42331	Rho GTPase-activating protein 25	ARHGAP25	S	533	ALSSQACDSKGDTLASPNSETGPGKKNSGEE	1
Q9NRY4	Rho GTPase-activating protein 35	ARHGAP35;GRLF1	S	589	ISSRFIRPSDRNQKNSLSDPNIDRINLVILG	0.994309
P98171	Rho GTPase-activating protein 4	ARHGAP4	S	408	VVASDDGDVLDSFQTSPSTESLKSTSSDPGS	0.810577
P98171	Rho GTPase-activating protein 4	ARHGAP4	S	413	DGDVLDSFQTSPSTESLKSTSSDPGSRQAGR	0.797513
Q13017	Rho GTPase-activating protein 5	ARHGAP5	S	1218	PVETWKGGIDNPAITSDQELDDKKMKKKTHK	0.996415
R4GN15	Rho GTPase-activating protein 9	ARHGAP9	S	560	ELVSKPLLRLSSRRSSIRGPEGTEQNRVRNK	0.831024
M0QZR4	Rho guanine nucleotide exchange factor 1	ARHGEF1	S	919	GPPRDGDGVPGGGPLSPARTQEIQENLLSLE	1
M0QZR4	Rho guanine nucleotide exchange factor 1	ARHGEF1	S	842	PKPRPSPSSTREPLLSSSENGNGGRETSPAD	0.988098
M0QZR4		ARHGEF1	T	430	DPSSATAVLGPARRATPEPGDEGEPGRSGLE	1
Q6ZSZ5	Rho guanine nucleotide exchange factor 18	ARHGEF18	S	1160	LPGPPAPSPLPATPLSAKEDASKEDVIFF__	0.916146
Q6ZSZ5	Rho guanine nucleotide exchange factor 18	ARHGEF18	S	760	SSTDPRPRDWRGPPNSPDLKLSDSDIPGSSE	0.998603
Q92974	Rho guanine nucleotide exchange factor 2	ARHGEF2	S	696	REPALPLEPDSGGNTSPGVTANGEARTFNGS	0.925694
Q92974	Rho guanine nucleotide exchange factor 2	ARHGEF2	S	932	SVHRNFEDRERQELGSPEERLQDSSDPDTGS	1
Q92974	Rho guanine nucleotide exchange factor 2	ARHGEF2	S	174	FNDESPLGLRRILSQSTDSLNMRNRTLSVES	0.91193
Q92974	Rho guanine nucleotide exchange factor 2	ARHGEF2	S	960	TGSEEEGSSRLSPPHSPRDFTRMQDIPEETE;TGSEEEGSSRLSPPHSPRGETLAETWTRDFT	0.999998
Q92974	Rho guanine nucleotide exchange factor 2	ARHGEF2	S	137	SAIYPSDSFRQSLLGSRRGRSSLSLAKSVST	0.999999
Q92974	Rho guanine nucleotide exchange factor 2	ARHGEF2	S	645	GMALPTLPRGLFRSESLESPRGERLLQDAIR	0.999604
Q92974	Rho guanine nucleotide exchange factor 2	ARHGEF2	S	886	AEAPWARRPVDPRRRSLPAGDALYLSFNPPQ	1
Q92974	Rho guanine nucleotide exchange factor 2	ARHGEF2	T	679	GLKDLLVGPGVELLLTPREPALPLEPDSGGN	1
Q8TER5	Rho guanine nucleotide exchange factor 40	ARHGEF40	S	419	DKEDASHQEALGNLPSPSEHKLPECHLVKEE	0.905115
Q15052	Rho guanine nucleotide exchange factor 6	ARHGEF6	S	684	SANFQQGHGSSTRKDSIPQVLLPEEEKLIIE	1
Q15052	Rho guanine nucleotide exchange factor 6	ARHGEF6	S	225	PSNYVREIKSSERPLSPKAVKGFETAPLTKN	1
Q14155-1	Rho guanine nucleotide exchange factor 7	ARHGEF7	S	560	SAKTRQTLNSSSRKESAPQVLLPEEEKIIVE	1
Q15052	Rho guanine nucleotide exchange factor 7;Rho guanine nucleotide exchange factor 6	ARHGEF7;ARHGEF6	S	488	LFPNVLLMLSASPRMSGFIYQGKLPTTGMTI;LFSNVLIMLSASPRMSGFIYQGKIPIAGTVV	1
O14497	AT-rich interactive domain-containing protein 1A	ARID1A	S	696	FSPHTSPHLPGIRGPSPSPVGSPASVAQSRS	0.99998
O14497	AT-rich interactive domain-containing protein 1A	ARID1A	S	772	PQMPQYSSPQPGSALSPRQPSGGQIHTGMGS	0.860227
O14497	AT-rich interactive domain-containing protein 1A	ARID1A	S	1604	APLPRPMENRTSPSKSPFLHSGMKMQKAGPP	1
O14497	AT-rich interactive domain-containing protein 1A	ARID1A	S	1755	GQRTLLDPGRFSKVSSPAPMEGGEEEEELLG	0.997322
O14497	AT-rich interactive domain-containing protein 1A	ARID1A	T	1888	PCPPAPRKHVTTAEGTPGTTDQEGPPPDGPP	0.989047
O14497	AT-rich interactive domain-containing protein 1A	ARID1A	S	696	FSPHTSPHLPGIRGPSPSPVGSPASVAQSRS	0.99998
O14497	AT-rich interactive domain-containing protein 1A	ARID1A	S	702	PHLPGIRGPSPSPVGSPASVAQSRSGPLSPA	0.999898
Q68CP9	AT-rich interactive domain-containing protein 2	ARID2	S	1270	GLHVHERKIEVMENPSCRRGATNTSNGDTKE	1
Q99856	AT-rich interactive domain-containing protein 3A	ARID3A	S	77	LAAMRAAAAGLGHPASPGGSEDGPPGSEEED	1
Q99856	AT-rich interactive domain-containing protein 3A	ARID3A	S	101	PGSEEEDAAREGTPGSPGRGREGPGEEHFED	0.999553
Q99856	AT-rich interactive domain-containing protein 3A	ARID3A	S	77	LAAMRAAAAGLGHPASPGGSEDGPPGSEEED	1
Q99856	AT-rich interactive domain-containing protein 3A	ARID3A	S	81	RAAAAGLGHPASPGGSEDGPPGSEEEDAARE	0.999999
P29374	AT-rich interactive domain-containing protein 4A	ARID4A	S	427	HHEPKVKEEKKDLEESMEEALKLDQEMPLTE	1
P29374	AT-rich interactive domain-containing protein 4A	ARID4A	S	863	QCVKEKKLKRKILGQSSPEKKIRIENGMEMT	0.822693
P29374	AT-rich interactive domain-containing protein 4A	ARID4A	S	864	CVKEKKLKRKILGQSSPEKKIRIENGMEMTN	0.885608
P29374	AT-rich interactive domain-containing protein 4A	ARID4A	S	1140	PVKHLNVSKPQKLARSPARISPHIKDGEKDK	1
P29374	AT-rich interactive domain-containing protein 4A	ARID4A	S	1145	NVSKPQKLARSPARISPHIKDGEKDKHREKH	1
Q4LE39	AT-rich interactive domain-containing protein 4B	ARID4B	S	778	NKVHADLVISKPVSKSPERLRKDIEVLSEDT	1
Q4LE39	AT-rich interactive domain-containing protein 4B	ARID4B	S	1184	PVKSVSTGMKSHSTKSPARTQSPGKCGKNGD	0.999808
Q4LE39	AT-rich interactive domain-containing protein 4B	ARID4B	S	1190	TGMKSHSTKSPARTQSPGKCGKNGDKDPDLK	0.993068
Q66PJ3	ADP-ribosylation factor-like protein 6-interacting protein 4	ARL6IP4	S	332	QVEALPGPSLDQWHRSAGEEEDGPVLTDEQK	1
Q8N6S5	ADP-ribosylation factor-like protein 6-interacting protein 6	ARL6IP6	S	80	SEPRKRSVLPPDGNGSPVLPDKRNGIFPAAA	1
Q8N6S5	ADP-ribosylation factor-like protein 6-interacting protein 6	ARL6IP6	S	2	______________MSFAESGWRSALRRRGP	0.999993
Q8N2F6-2	Armadillo repeat-containing protein 10	ARMC10	S	45	GRRRGDRELGIRSSKSAEDLTDGSYDDVLNA	1
Q7Z3E5	LisH domain-containing protein ARMC9	ARMC9	S	329	PSLDYEKLKKDLILGSDRLKAFLLQALRWRL	1
Q9UH62	Armadillo repeat-containing X-linked protein 3	ARMCX3	S	110	RARATRARRAVQKRASPNSDDTVLSPQELQK	0.999511
O15143	Actin-related protein 2/3 complex subunit 1B	ARPC1B	S	310	GLTARERFQNLDKKASSEGGTAAGAGLDSLH	0.999641
O15143	Actin-related protein 2/3 complex subunit 1B	ARPC1B	S	311	LTARERFQNLDKKASSEGGTAAGAGLDSLHK	0.97486
P49407	Beta-arrestin-1	ARRB1	S	412	KGMKDDKEEEEDGTGSPQLNNR_________	0.999738
Q9ULH1	Arf-GAP with SH3 domain, ANK repeat and PH domain-containing protein 1	ASAP1	S	843	PPPPPGHKRTLSDPPSPLPHGPPNKGAVPWG	1
Q9ULH1	Arf-GAP with SH3 domain, ANK repeat and PH domain-containing protein 1	ASAP1	T	1048	RDAIQKQASEDSNDLTPTLPETPVPLPRKIN	0.916068
Q9ULH1	Arf-GAP with SH3 domain, ANK repeat and PH domain-containing protein 1	ASAP1	S	843	PPPPPGHKRTLSDPPSPLPHGPPNKGAVPWG	1
Q9Y576	Ankyrin repeat and SOCS box protein 1	ASB1	S	6	__________MAEGGSPDGRAGPGSAGRNLK	0.993376
Q8N3C0	Activating signal cointegrator 1 complex subunit 3	ASCC3	S	2195	TQASLSAQVNTKVSDSLTDLALK________	0.990354
Q9Y294	Histone chaperone ASF1A	ASF1A	S	166	INWEDNTEKLEDAESSNPNLQSLLSTDALPS	0.880746
Q9Y294	Histone chaperone ASF1B;Histone chaperone ASF1A	ASF1B;ASF1A	S	142	PMKPDFSQLQRNILASNPRVTRFHINWDNNM;PVKPDFSKLQRNILASNPRVTRFHINWEDNT	1
Q8IZT6	Abnormal spindle-like microcephaly-associated protein	ASPM	S	367	HLESTIAHEIYQKILSPDSFIKDNYGLNQDL	0.999999
Q8IZT6	Abnormal spindle-like microcephaly-associated protein	ASPM	S	425	TCKVPLSNENSQVPQSPEDWRKSEVSPRIPE	1
Q9NVM9	Protein asunder homolog	ASUN	S	626	KEELAEAEIIKDSPDSPEPPNKKPLVEMDET	1
Q76L83	Putative Polycomb group protein ASXL2	ASXL2	S	439	PVVSQSECKEEALQMSSPGRKEECESQGEVQ	0.899389
Q76L83	Putative Polycomb group protein ASXL2	ASXL2	S	440	VVSQSECKEEALQMSSPGRKEECESQGEVQP	0.804823
Q76L83	Putative Polycomb group protein ASXL2	ASXL2	S	562	QETNMKEPLATLVDQSPESLKRKSSLTQEEA	0.965354
Q76L83	Putative Polycomb group protein ASXL2	ASXL2	S	648	PSQVSPRARFPVSITSPNRTGARTLADIKAK	0.829954
Q76L83	Putative Polycomb group protein ASXL2	ASXL2	S	395	QSSGLSLEDSKKLTASPSDPKVKKTPAEQPK	0.994274
Q76L83	Putative Polycomb group protein ASXL2	ASXL2	S	156	QSGCPSPTIPAGKVISPSQKHSKKALKQALK	0.997294
Q6PL18	ATPase family AAA domain-containing protein 2	ATAD2	S	327	PRHQRKPNIFYSGPASPARPRYRLSSAGPRS	0.999657
Q6PL18	ATPase family AAA domain-containing protein 2	ATAD2	S	1302	EGKEMCVLRMTRARRSQVEQQQLITVEKALA	1
Q9ULI0	ATPase family AAA domain-containing protein 2B	ATAD2B	S	318	AHQKKRENTLFDIHRSPARRSHIRRKKHAIH	0.997878
Q9ULI0	ATPase family AAA domain-containing protein 2B	ATAD2B	S	1347	LEALECSNNEKLEPGSDVEVKDAELDKEGAS	1
Q9ULI0	ATPase family AAA domain-containing protein 2B	ATAD2B	S	81	VTLDEARKVEVDGSLSDSHVSPPAKRTLKQP	0.928311
C9J1G9		ATAD2B	S	5	___________MRLPSLLSYRAVSKARKHIL	1
C9J1G9		ATAD2B	S	13	___MRLPSLLSYRAVSKARKHILQIHTRDWN	0.999919
C9J1G9		ATAD2B	Y	9	_______MRLPSLLSYRAVSKARKHILQIHT	0.999904
Q9NVI7-2	ATPase family AAA domain-containing protein 3A	ATAD3A	S	584	MCWLKAEGPGRGDEPSPS_____________	0.965573
Q96QE3	ATPase family AAA domain-containing protein 5	ATAD5	S	1222	SPKKVVTSPRKVPPPSPKSSGPKRALPPKTL	1
Q96QE3	ATPase family AAA domain-containing protein 5	ATAD5	S	44	KDDDTSTCKTITKYLSPLGKTRDRVFAPPKP	1
Q5SQI0	Alpha-tubulin N-acetyltransferase 1	ATAT1	S	315	PHPTARLLLAADPGGSPAQRRRTRGTPPGLV	1
P15336	Cyclic AMP-dependent transcription factor ATF-2	ATF2	S	112	KKASEDDIKKMPLDLSPLATPIIRSKIEEPS	1
P15336	Cyclic AMP-dependent transcription factor ATF-2	ATF2	T	69	KFGPARNDSVIVADQTPTPTRFLKNCEEVGL	0.994681
P15336	Cyclic AMP-dependent transcription factor ATF-2	ATF2	T	71	GPARNDSVIVADQTPTPTRFLKNCEEVGLFN	0.898772
P17544-2	Cyclic AMP-dependent transcription factor ATF-7	ATF7	S	392	CPVTALQKKTQGYLESPKESSEPTGSPAPVI	1
P17544-2	Cyclic AMP-dependent transcription factor ATF-7	ATF7	T	101	EKKAAAGPLDMSLPSTPDIKIKEEEPVEEVT	0.952236
P17544-2	Cyclic AMP-dependent transcription factor ATF-7	ATF7	T	53	GPARTDSVIIADQTPTPTRFLKNCEEVGLFN	0.988209
P17544-2	Cyclic AMP-dependent transcription factor ATF-7	ATF7	T	51	KFGPARTDSVIIADQTPTPTRFLKNCEEVGL	0.99994
P17544-2	Cyclic AMP-dependent transcription factor ATF-7	ATF7	T	53	GPARTDSVIIADQTPTPTRFLKNCEEVGLFN	0.988209
Q6VMQ6	Activating transcription factor 7-interacting protein 1	ATF7IP	S	496	QESSESLPKEAFLVLSDEEDISGEKDESEVI	0.999953
Q6VMQ6	Activating transcription factor 7-interacting protein 1	ATF7IP	S	477	ETNPDLEEKMESSFGSPSKQESSESLPKEAF	0.995782
Q6VMQ6	Activating transcription factor 7-interacting protein 1	ATF7IP	S	673	EDLKKRHEHPPNPPVSPGKTVNDVNSNNNMS	1
Q6VMQ6	Activating transcription factor 7-interacting protein 1	ATF7IP	S	559	RPSEKNEFSRRKRSKSEDMDNVQSKRRRYME	1
Q6VMQ6	Activating transcription factor 7-interacting protein 1	ATF7IP	S	477	ETNPDLEEKMESSFGSPSKQESSESLPKEAF	0.995782
Q5U623	Activating transcription factor 7-interacting protein 2	ATF7IP2	S	416	NSEAMILDKNLESVNSPIEKSSVNYEPSNPS	0.999882
Q8NAA4	Autophagy-related protein 16-2	ATG16L2	S	304	DVVKGLLDFKKRRGHSIGGAPEQRYQIIPVC	1
Q96BY7	Autophagy-related protein 2 homolog B	ATG2B	S	255	SPVCSTAPVETEPKLSPSWNPKIIYEPHPQL	0.998131
Q9Y4P1	Cysteine protease ATG4B	ATG4B	S	383	SLDSSDVERLERFFDSEDEDFEILSL_____	1
Q7Z3C6	Autophagy-related protein 9A	ATG9A	S	656	GSRHRAEVASALRSFSPLQPGQAPTGRAHST	0.993464
Q6DD88	Atlastin-3	ATL3	S	535	NSTQATVRDAVVGRPSMDKKAQ_________	1
P54259	Atrophin-1	ATN1	S	645	TASPPGPPPYGKRAPSPGAYKTATPPGYKPG	0.999988
Q9Y2G3	Probable phospholipid-transporting ATPase IF	ATP11B	S	1154	RVIGRCSPTHISRSWSASDPFYTNDRSILTL	0.993996
Q9HD20	Manganese-transporting ATPase 13A1	ATP13A1	S	899	NAPERVVERRRRPRDSPTLSNSGIRATSRTA	0.99111
P05023	Sodium/potassium-transporting ATPase subunit alpha-1	ATP1A1	S	16	MGKGVGRDKYEPAAVSEQGDKKGKKGKKDRD	1
P20020	Plasma membrane calcium-transporting ATPase 1;Calcium-transporting ATPase	ATP2B1	S	1216	DDTDAEDDAPTKRNSSPPPSPNKNNNAVDSG	1
P20020	Plasma membrane calcium-transporting ATPase 1;Calcium-transporting ATPase	ATP2B1	S	1220	AEDDAPTKRNSSPPPSPNKNNNAVDSGIHLT	1
P48047	ATP synthase subunit O, mitochondrial	ATP5O	Y	82	QILKEPKVAASVLNPYVKRSIKVKSLNDITA	0.867904
Q8WXE1	ATR-interacting protein	ATRIP	S	224	SERANKLAAPSVSHVSPRKNPSVVIKPEACS	0.962379
Q8WXE1	ATR-interacting protein	ATRIP	S	518	DSAAGEGNRSLVHRLSDGDMTSALRGVADDQ	0.997655
P46100	Transcriptional regulator ATRX	ATRX	S	1061	SKKIRDKTSKKKDELSDYAEKSTGKGDSCDS	0.999999
P46100	Transcriptional regulator ATRX	ATRX	S	1527	REREKLREVIEIEDASPTKCPITTKLVLDED	0.995396
P46100	Transcriptional regulator ATRX	ATRX	S	598	TKELYVKLTPVSLSNSPIKGADCQEVPQDKD	0.999255
P46100	Transcriptional regulator ATRX	ATRX	S	1352	RHRLLRHKLTVSDGESGEEKKTKPKEHKEVK	0.999999
P46100	Transcriptional regulator ATRX	ATRX	S	1996	LKLEESKATSSSNPSSPAPDWYKDFVTDADA	0.948248
P46100	Transcriptional regulator ATRX	ATRX	S	594	TAKVTKELYVKLTPVSLSNSPIKGADCQEVP	0.966221
P46100	Transcriptional regulator ATRX	ATRX	S	1348	KPRYRHRLLRHKLTVSDGESGEEKKTKPKEH	0.999879
P46100	Transcriptional regulator ATRX	ATRX	S	1352	RHRLLRHKLTVSDGESGEEKKTKPKEHKEVK	0.999999
Q99700	Ataxin-2	ATXN2	S	758	SSEAKDSRLQDQRQNSPAGNKENIKPNETSP	1
Q99700	Ataxin-2	ATXN2	S	784	NETSPSFSKAENKGISPVVSEHRKQIDDLKK	0.999949
Q99700	Ataxin-2	ATXN2	S	624	STMPKRMSSEGPPRMSPKAQRHPRNHRVSAG	1
Q8WWM7	Ataxin-2-like protein	ATXN2L	S	594	KEKEVDGLLTSEPMGSPVSSKTESVSDKEDK	0.9915
Q8WWM7	Ataxin-2-like protein	ATXN2L	S	111	IGSARGQSTGKGPPQSPVFEGVYNNSRMLHF	1
Q8WWM7	Ataxin-2-like protein	ATXN2L	S	559	ELRKFGAQFKLQPSSSPENSLDPFPPRILKE	0.847551
G3V4F5		ATXN3	S	135	WFTVRKLGKQVILYLSLRVICQIAKLTNSCR	0.926711
G3V4F5		ATXN3	Y	133	EHWFTVRKLGKQVILYLSLRVICQIAKLTNS	0.920507
Q5T6C5	Ataxin-7-like protein 2	ATXN7L2	S	179	TQKDNLCQPGGLTKDSPGKPPMAPPSKEPPG	0.999999
Q6L9W6	Beta-1,4-N-acetylgalactosaminyltransferase 3	B4GALNT3	S	685	ALEVTRVFLKKLNQRSRGRYQLQRIVNVEKR	0.996712
O14867	Transcription regulator protein BACH1	BACH1	S	445	QKRSECPWLGIRISESPEPGQRTFTTLSSVN	0.99998
Q92934	Bcl2-associated agonist of cell death	BAD	S	118	NLWAAQRYGRELRRMSDEFVDSFKKGLPRPK	0.999999
Q92934	Bcl2-associated agonist of cell death	BAD	S	134	DEFVDSFKKGLPRPKSAGTATQMRQSSSWTR	0.998894
Q92934	Bcl2-associated agonist of cell death	BAD	S	99	EGMGEEPSPFRGRSRSAPPNLWAAQRYGREL	1
P46379	Large proline-rich protein BAG6	BAG6;BAT3	S	113	ASSGTGSASATHGGGSPPGTRGPGASVHDRN	0.997916
P46379	Large proline-rich protein BAG6	BAG6;BAT3	S	964	PLPEEPMEVQGAERASPEPQRENASPAPGTT	1
P46379	Large proline-rich protein BAG6	BAG6;BAT3	S	973	QGAERASPEPQRENASPAPGTTAEEAMSRGP	1
P46379	Large proline-rich protein BAG6	BAG6;BAT3	S	964	PLPEEPMEVQGAERASPEPQRENASPAPGTT	1
P46379	Large proline-rich protein BAG6	BAG6;BAT3	S	973	QGAERASPEPQRENASPAPGTTAEEAMSRGP	1
Q9P281	BAH and coiled-coil domain-containing protein 1	BAHCC1	S	2079	KDKAGKAELLTSGAKSPTGASDHFLGRRGSP	0.989272
Q9P281	BAH and coiled-coil domain-containing protein 1	BAHCC1	S	2042	KVSSEAPPPSEAATPSLSPKAQDGPEALKTP	0.854698
P80723	Brain acid soluble protein 1	BASP1	S	194	AAPSSKETPAATEAPSSTPKAQGPAASAEEP	0.75248
P80723	Brain acid soluble protein 1	BASP1	T	36	EKDKKAEGAATEEEGTPKESEPQAAAEPAEA	1
Q9NRL2	Bromodomain adjacent to zinc finger domain protein 1A	BAZ1A	S	1413	SLQESESKRRCRKRQSPEPSPVTLGRRSSGR	0.999998
Q9NRL2	Bromodomain adjacent to zinc finger domain protein 1A	BAZ1A	T	731	ESKDTEQKELDQDMVTEDEDDPGSHKRGRRG	0.999972
Q9UIG0	Tyrosine-protein kinase BAZ1B	BAZ1B	S	1342	VDELVLQTKRSSRRQSLELQKCEEILHKIVK	1
Q9UIG0	Tyrosine-protein kinase BAZ1B	BAZ1B	S	349	PKLWCHVHLKKSLSGSPLKVKNSKNSKSPEE	0.999908
Q9UIF9	Bromodomain adjacent to zinc finger domain protein 2A	BAZ2A	S	496	SLEVPLTASVTSPKASPVTSPAAAFPTASPA	0.999586
Q9UIF9	Bromodomain adjacent to zinc finger domain protein 2A	BAZ2A	S	509	KASPVTSPAAAFPTASPANKDVSSFLETTAD	0.997883
Q9UIF9	Bromodomain adjacent to zinc finger domain protein 2A	BAZ2A	S	1770	EGDGRRRRVLLRGRESPAAGPRYSEEGLSPS	1
Q9UIF9	Bromodomain adjacent to zinc finger domain protein 2A	BAZ2A	S	1397	LAPKRRAGDPGEMPQSPTGLGQPKRRGRPPS	0.993674
Q9UIF9	Bromodomain adjacent to zinc finger domain protein 2A	BAZ2A	S	1783	RESPAAGPRYSEEGLSPSKRRRLSMRNHHSD	0.869896
Q9UIF9	Bromodomain adjacent to zinc finger domain protein 2A	BAZ2A	S	496	SLEVPLTASVTSPKASPVTSPAAAFPTASPA	0.999586
Q9UIF9	Bromodomain adjacent to zinc finger domain protein 2A	BAZ2A	S	509	KASPVTSPAAAFPTASPANKDVSSFLETTAD	0.997883
Q9BXC9	Bardet-Biedl syndrome 2 protein	BBS2	S	365	LELRNYEENAKAELASPLNEADGHRGIIPAN	1
Q8WY36	HMG box transcription factor BBX	BBX	S	183	KKLWAFPSDSSRDLPSPKKAKTEEMPQLNFG	0.999475
Q8WY36	HMG box transcription factor BBX	BBX	S	159	NPGYKWCPTTNKPVKSPTPTVNPRKKLWAFP	0.998713
Q9H165	B-cell lymphoma/leukemia 11A	BCL11A	S	86	CNGSLCLEKAVDKPPSPSPIEMKKASNPVEV	0.973036
Q9H165	B-cell lymphoma/leukemia 11A	BCL11A	S	625	GESASGGLSKKLLLGSPSSLSPFSKRIKLEK	0.999797
Q9H165	B-cell lymphoma/leukemia 11A	BCL11A	S	630	GGLSKKLLLGSPSSLSPFSKRIKLEKEFDLP	0.914208
O43521	Bcl-2-like protein 11	BCL2L11	S	77	GPLAPPASPGPFATRSPLFIFMRRSSLLSRS	1
Q9BXK5	Bcl-2-like protein 13	BCL2L13	S	426	EKEINAREESLVEELSPASEKKPVPPSEGKS	0.999994
P41182	B-cell lymphoma 6 protein	BCL6	S	333	PPNAPLNRKGLVSPQSPQKSDCQPNSPTESC	1
Q9NYF8	Bcl-2-associated transcription factor 1	BCLAF1	S	177	QEKQTKKAEGEPQEESPLKSKSQEEPKDTFE	1
Q9NYF8	Bcl-2-associated transcription factor 1	BCLAF1	S	512	PEQVKSEKLKDLFDYSPPLHKNLDAREKSTF	1
Q9NYF8	Bcl-2-associated transcription factor 1	BCLAF1	S	198	SQEEPKDTFEHDPSESIDEFNKSSATSGDIW	0.999706
Q9NYF8	Bcl-2-associated transcription factor 1	BCLAF1	S	496	EDKNSERITVKKETQSPEQVKSEKLKDLFDY	1
Q9NYF8	Bcl-2-associated transcription factor 1	BCLAF1	S	397	DYFSDKESGKQKFNDSEGDDTEETEDYRQFR	1
Q9NYF8	Bcl-2-associated transcription factor 1	BCLAF1	S	450	GLKYKSKVSLKGNRESDGFREEKNYKLKETG	1
Q9NYF8	Bcl-2-associated transcription factor 1	BCLAF1	S	385	RAEGEWEDQEALDYFSDKESGKQKFNDSEGD	1
Q9NYF8	Bcl-2-associated transcription factor 1	BCLAF1	S	161	SSSPYSKSPVSKRRGSQEKQTKKAEGEPQEE	1
Q9NYF8	Bcl-2-associated transcription factor 1	BCLAF1	S	531	HKNLDAREKSTFREESPLRIKMIASDSHRPE	0.999997
Q9NYF8	Bcl-2-associated transcription factor 1	BCLAF1	S	648	TSYQKATEEHSTRQKSPEIHRRIDISPSTLR	0.999959
Q9NYF8	Bcl-2-associated transcription factor 1	BCLAF1	S	658	STRQKSPEIHRRIDISPSTLRKHTRLAGEER	0.970904
Q9NYF8	Bcl-2-associated transcription factor 1	BCLAF1	S	285	ERSGSGSVGNGSSRYSPSQNSPIHHIPSRRS	0.86287
Q9NYF8	Bcl-2-associated transcription factor 1	BCLAF1	S	290	GSVGNGSSRYSPSQNSPIHHIPSRRSPAKTI	0.99882
Q6W2J9	BCL-6 corepressor	BCOR	S	423	GHARKTAVQDRKDGSSPPLLEKQTVTKDVTD	0.985848
P11274	Breakpoint cluster region protein	BCR	S	1039	GIEVKLSVKFNSREFSLKRMPSRKQTGVFGV	0.99996
P11274	Breakpoint cluster region protein	BCR;BCR/ABL fusion	S	301	GMMEGEGKGPLLRSQSTSEQEKRLTWPRRSY	0.854329
O15155	BET1 homolog	BET1;DKFZp781C0425	S	50	LTESLRSKVTAIKSLSIEIGHEVKTQNKLLA	0.999952
Q9NYM9	BET1-like protein	BET1L	S	9	_______MADWARAQSPGAVEEILDRENKRM	1
Q96G01	Protein bicaudal D homolog 1	BICD1	T	701	EQIATLRAVLKANKQTAEVALANLKNKYENE	0.999789
Q9UBW5	Bridging integrator 2	BIN2	S	458	GSPTSPRASLGTGTASPRTSLEVSPNPEPPE	0.988479
Q9UBW5	Bridging integrator 2	BIN2	S	259	NKVFVVKGLSSSSRRSLVISPPVRTATVSSP	0.999937
Q9UBW5	Bridging integrator 2	BIN2	S	280	PVRTATVSSPLTSPTSPSTLSLKSESESVSA	0.775985
Q9NR09	Baculoviral IAP repeat-containing protein 6	BIRC6	S	577	IPFPCLLAGGLLTYKSPATSPISSNSHRSLD	0.999934
Q9NR09	Baculoviral IAP repeat-containing protein 6	BIRC6	S	581	CLLAGGLLTYKSPATSPISSNSHRSLDGLSR	0.96006
P54132	Bloom syndrome protein	BLM	T	337	LKDLDTSDRKEDVLSTSKDLLSKPEKMSMQE	0.78478
Q6QNY0	Biogenesis of lysosome-related organelles complex 1 subunit 3	BLOC1S3	S	65	RPTGLRVAGEAAETDSEPEPEPEPTAAPRDL	0.999989
Q6QNY0	Biogenesis of lysosome-related organelles complex 1 subunit 3	BLOC1S3	T	63	RGRPTGLRVAGEAAETDSEPEPEPEPTAAPR	0.999993
Q13873	Bone morphogenetic protein receptor type-2	BMPR2	Y	589	STPLTIGEKNRNSINYERQQAQARIPSPETS	0.965272
Q14692	Ribosome biogenesis protein BMS1 homolog	BMS1	S	639	SSGQKLGPQNFIDETSDIENLLKEEEDYKEE	0.951451
Q12982	BCL2/adenovirus E1B 19 kDa protein-interacting protein 2	BNIP2	S	114	DDLPKPKTTEVIRKGSITEYTAAEEKEDGRR	0.885942
Q8NFC6	Biorientation of chromosomes in cell division protein 1-like 1	BOD1L1	S	2964	RKPKRSLTVSDDAESSEPERKRQKSVSDPVE	0.765704
Q8NFC6	Biorientation of chromosomes in cell division protein 1-like 1	BOD1L1	S	2973	SDDAESSEPERKRQKSVSDPVEDKKEQESDE	0.993061
Q8NFC6	Biorientation of chromosomes in cell division protein 1-like 1	BOD1L1	S	3019	KVSNSPPLGRSKTQLSPSIKRKREVSPPGAR;RSTTRSEAQRSKTQLSPSIKRKREVSPPGAR	0.993791
H0Y9Y2		BOD1L1	S	164	KLAKEKLPTSEKVSNSPPLGRSKTQLSPSIK	0.998654
Q8NFC6	Biorientation of chromosomes in cell division protein 1-like 1	BOD1L1	S	1531	SVATSTEGKDKDVTLSPVKAGPATTTSSETR	0.999989
Q8NFC6	Biorientation of chromosomes in cell division protein 1-like 1	BOD1L1	S	2815	RQCPETEPHDTKEENSRDLEELPKTSSETNS	1
Q8NFC6	Biorientation of chromosomes in cell division protein 1-like 1	BOD1L1	S	832	DENVRKENNKKERRLSAEKTKAEHKSRRSSD	1
Q8NFC6	Biorientation of chromosomes in cell division protein 1-like 1	BOD1L1	S	538	AEKTKSSKTKGQGRSSVDLEESSTKSLEPKA	0.939398
Q8NFC6	Biorientation of chromosomes in cell division protein 1-like 1	BOD1L1	S	1077	MEKKLSRRLCENRRGSLSQEMAKGEEKLAAN	0.999682
Q12830	Nucleosome-remodeling factor subunit BPTF	BPTF	S	2370	STTAAGTGEQRQSKLSPQMQVHQDKTLPPAQ	1
Q12830	Nucleosome-remodeling factor subunit BPTF	BPTF	S	1231	GIGKTSTNSSKNLSESPVITKAKEGCQSDSM	0.998692
Q12830	Nucleosome-remodeling factor subunit BPTF	BPTF	S	1310	DVSIRSPETKCPKQNSIENDIEEKVSDLASR	1
Q12830	Nucleosome-remodeling factor subunit BPTF	BPTF	S	216	SSTPGRRKPRVHRPRSPILEEKDIPPLEFPK	1
Q12830	Nucleosome-remodeling factor subunit BPTF	BPTF	S	2098	SVTTGTKMVLTTKVGSPATVTFQQNKNFHQT	1
H7C560		BRAF	T	361	FQTEDFSLYACASPKTPIQAGGYGEFAAFK_	1
P38398	Breast cancer type 1 susceptibility protein	BRCA1	S	1457	LRNPEQSTSEKAVLTSQKSSEYPISQNPEGL	0.999127
P38398	Breast cancer type 1 susceptibility protein	BRCA1	S	1164	TPDDLLDDGEIKEDTSFAENDIKESSAVFSK	0.971971
P38398	Breast cancer type 1 susceptibility protein	BRCA1	S	1342	QSESQGVGLSDKELVSDDEERGTGLEENNQE	1
P38398	Breast cancer type 1 susceptibility protein	BRCA1	S	114	LEYANSYNFAKKENNSPEHLKDEVSIIQSMG	1
P51587	Breast cancer type 2 susceptibility protein	BRCA2	S	3319	CGTKYETPIKKKELNSPQMTPFKKFNEISLL	0.999999
O95696-2	Bromodomain-containing protein 1	BRD1	S	498	KRLSRNGAPLLRRLQSSLQSQRSSQQRENDE	0.994491
O95696-2	Bromodomain-containing protein 1	BRD1	S	906	VSPPKSAKNTETQPTSPQLGTKTFLSVVLPR	0.988168
O95696-2	Bromodomain-containing protein 1	BRD1	S	1183	DRAMNHLSRVHGEPTSDLSDID_________	0.92276
O95696-2	Bromodomain-containing protein 1	BRD1	S	1186	MNHLSRVHGEPTSDLSDID____________	1
P25440	Bromodomain-containing protein 2	BRD2	S	298	ADTTTPTPTAILAPGSPASPPGSLEPKAARL	0.993912
P25440	Bromodomain-containing protein 2	BRD2	S	298	ADTTTPTPTAILAPGSPASPPGSLEPKAARL	0.993912
P25440	Bromodomain-containing protein 2	BRD2	S	301	TTPTPTAILAPGSPASPPGSLEPKAARLPPM	0.946295
Q15059	Bromodomain-containing protein 3	BRD3	S	263	TTTPTTSAITASRSESPPPLSDPKQAKVVAR	0.999217
Q15059	Bromodomain-containing protein 3	BRD3	S	560	TAGRQLKKGGKQASASYDSEEEEEGLPMSYD	0.977015
O60885	Bromodomain-containing protein 4	BRD4	S	1126	KEEKIHSPIIRSEPFSPSLRPEPPKHPESIK	0.903685
O60885	Bromodomain-containing protein 4	BRD4	S	470	AKMPDEPEEPVVAVSSPAVPPPTKVVAPPSS	0.779297
O60885	Bromodomain-containing protein 4	BRD4	S	601	KEPAPMKSKPPPTYESEEEDKCKPMSYEEKR	0.9971
Q9H0E9-2	Bromodomain-containing protein 8	BRD8	S	460	FRSGVAEAPVGSKAPSIDGKEELDLAEKMDI	1
Q9H0E9-2	Bromodomain-containing protein 8	BRD8	S	683	DPLEAETQHKFEMSDSLKEESGTIFGSQIKD	0.990698
Q9H0E9-2	Bromodomain-containing protein 8	BRD8	T	264	VTDDSPQKKMLGQKATPPPSPLLSELLKKGS	0.999999
Q9BX63	Fanconi anemia group J protein	BRIP1	S	197	NLDAKVDSGKTVKLNSPLEKINSFSPQKPPG	1
Q9BX63	Fanconi anemia group J protein	BRIP1	S	1237	ELGKTHEIEIKNFKPSPSKNKGMFPGFK___	0.980321
Q9HCU9	Breast cancer metastasis-suppressor 1	BRMS1	S	237	ILEDWTAIKKARAAVSPQKRKSDGP______	1
Q5PSV4	Breast cancer metastasis-suppressor 1-like protein	BRMS1L	S	197	WNDELQSRKKRKDPFSPDKKKPVVVSGPYIV	1
Q9ULD4	Bromodomain and PHD finger-containing protein 3	BRPF3	S	713	ENIGYDPERGTHLPESPKLEDFYRFSWEDVD	0.999999
Q9NW68	BSD domain-containing protein 1	BSDC1	S	92	GLSDFLGVISDTFAPSPDKTIDCDVITLMGT	0.900692
Q9NW68	BSD domain-containing protein 1	BSDC1	S	387	SDSGKSTPSNNGKKGSSTDISEDWEKDFDLD	0.998088
P35613	Basigin	BSG	S	362	KRRKPEDVLDDDDAGSAPLKSSGQHQNDKGK	1
O14981	TATA-binding protein-associated factor 172	BTAF1	S	224	KNKAKRMAKLFAKQRSRDAVETNEKSNDSTD	0.999998
P20290	Transcription factor BTF3;Transcription factor BTF3 homolog 4	BTF3;BTF3L4	T	82	KGTARRKKKVVHRTATADDKKLQFSLKKLGV;KGTARRKKKVVHRTATADDKKLQSSLKKLAV	0.995713
P62324	Protein BTG1	BTG1	T	158	VDSRISCKEELLLGRTSPSKNYNMMTVSG__	0.865882
Q06187	Tyrosine-protein kinase BTK;Non-specific protein-tyrosine kinase	BTK	T	191	KPGSSHRKTKKPLPPTPEEDQILKKPLPPEP	1
Q7KYR7	Butyrophilin subfamily 2 member A1;Butyrophilin subfamily 2 member A2	BTN2A1;BTN2A2	S	526	VPEEGLTLHRVGTHQSL______________	0.999999
O43683	Mitotic checkpoint serine/threonine-protein kinase BUB1	BUB1	S	655	SCEENMVVPSRDGKFSPIQEKSPKQALSSHM	1
O43683	Mitotic checkpoint serine/threonine-protein kinase BUB1	BUB1	S	596	VWGIRCNKTLAPSPKSPGDFTSAAQLASTPF	0.9925
Q9BRD0	BUD13 homolog	BUD13	S	357	LDSKGDCQKATDSDLSSPRHKQSPGHQDSDS	0.82886
Q9BRD0	BUD13 homolog	BUD13	S	358	DSKGDCQKATDSDLSSPRHKQSPGHQDSDSD	0.936961
Q9BRD0	BUD13 homolog	BUD13	S	163	PDPSPRRARHDTPDPSPLRGARHDSDTSPPR	1
Q9BRD0	BUD13 homolog	BUD13	S	127	DLPSNRHFRHDTPDSSPRRVRHGTPDPSPRK	0.755742
Q9BRD0	BUD13 homolog	BUD13	S	325	LSFPKNSKYEYDPDISPPRKKQAKSHFGDKK	1
Q9BRD0	BUD13 homolog	BUD13	S	172	HDTPDPSPLRGARHDSDTSPPRRIRHDSSDT	0.995473
Q9BRD0	BUD13 homolog	BUD13	S	197	HDSSDTSPPRRARHDSPDPSPPRRPQHNSSG	1
Q9BRD0	BUD13 homolog	BUD13	S	201	DTSPPRRARHDSPDPSPPRRPQHNSSGASPR	1
Q9BRD0	BUD13 homolog	BUD13	S	163	PDPSPRRARHDTPDPSPLRGARHDSDTSPPR	1
Q9BRD0	BUD13 homolog	BUD13	T	159	RHDTPDPSPRRARHDTPDPSPLRGARHDSDT	1
Q13895	Bystin	BYSL	S	98	RERTTRLGPRMPQDGSDDEDEEWPTLEKAAT	1
O95153	Peripheral-type benzodiazepine receptor-associated protein 1	BZRAP1	S	1411	MPGLVGGSSRRRGGGSPEKPPSRRRPPDPRE	1
Q8N655	Uncharacterized protein C10orf12	C10orf12	S	273	PSKEITSHEEGGGDVSPRKEPQEPEVCPTKI	1
Q9BUA3	Uncharacterized protein C11orf84	C11orf84	S	308	PKDREVAEGGLPRAESPSPAPPPGLRGTLDL	0.999925
Q96C57	Uncharacterized protein C12orf43	C12orf43	S	248	LGTKKKKKAKKASETSPFPPAKSATAIPAN_	0.966555
Q96C57	Uncharacterized protein C12orf43	C12orf43	S	138	RLFFTSVPGGREKEESPQPRRKRQPSSSSED	1
Q8N5I9	Uncharacterized protein C12orf45	C12orf45	S	178	LPNSEGGKGKIEVLDSPASKKKK________	0.959993
Q9H972	Uncharacterized protein C14orf93	C14orf93	S	405	EKKLRSRRYRLFANRSSIMRHFGPEDQRLWN	1
Q9H972	Uncharacterized protein C14orf93	C14orf93	S	406	KKLRSRRYRLFANRSSIMRHFGPEDQRLWND	1
Q6UWD8	Transmembrane protein C16orf54	C16orf54	S	194	SVQFGSPQARRQRPGSPDPEWGLQPRVTLEQ	1
Q6UWD8	Transmembrane protein C16orf54	C16orf54	T	116	PLLTDRAPEPPTQVGTLEARATAPPAPSAPN	1
F8W1H0		C17orf49	S	9	_______MQLHPVADSSPAGAKWTETEIEML	0.804938
F8W1H0		C17orf49	S	10	______MQLHPVADSSPAGAKWTETEIEMLR	0.752934
Q8IXM2	Chromatin complexes subunit BAP18	C17orf49;BAP18;RNASEK-C17orf49	S	110	ESPKKGPKKVASGVLSPPPAAPPPSSSSVPE	0.806175
Q8IXM2	Chromatin complexes subunit BAP18	C17orf49;BAP18;RNASEK-C17orf49	S	96	KRKVYEDSGIPLPAESPKKGPKKVASGVLSP	1
Q53F19	Uncharacterized protein C17orf85	C17orf85	S	415	DEMDYDLELKMISTPSPKKSMKMTMYADEVE	0.999998
Q53F19	Uncharacterized protein C17orf85	C17orf85	S	500	STKSDIRQRLGKRPHSPEKAFSSNPVVRREP	1
Q53F19	Uncharacterized protein C17orf85	C17orf85	S	415	DEMDYDLELKMISTPSPKKSMKMTMYADEVE	0.999998
Q53F19	Uncharacterized protein C17orf85	C17orf85	T	413	DSDEMDYDLELKMISTPSPKKSMKMTMYADE	0.97177
Q96B23-2	Uncharacterized protein C18orf25	C18orf25;ARKL1	S	34	PPKASEQETAKEEDGSVELESQVQKDGVADS	0.999999
Q96B23-2	Uncharacterized protein C18orf25	C18orf25;ARKL1	S	66	VISSMPCLLMELRRDSSESQLASTESDKPTT	0.918239
Q6ZWK4	Uncharacterized protein C1orf186	C1orf186	S	128	YTQVVFSDPGELKNDSPLDYENIKEITDYVN	1
Q8N6N3	UPF0690 protein C1orf52	C1orf52	S	158	AKKARLLPEGEETLESDDEKDEHTSKKRKVE	1
O14523	C2 domain-containing protein 2-like	C2CD2L	S	660	KLIFRRRPRQKEAGLSQSHDDLSNATATPSV	0.895869
O14523	C2 domain-containing protein 2-like	C2CD2L	S	468	QSRPRIDGKLDSPSRSPSKVEVTEKTTTVLS	0.759128
Q8TF44	C2 calcium-dependent domain-containing protein 4C	C2CD4C	T	43	AGDKASKGPLYSNVLTPDKIPDFFIPPKLPS	0.770087
Q86YS7	C2 domain-containing protein 5	C2CD5	S	295	SSGPSTPLKNQTYSFSPSKSYSRQSSSSDTD	0.960089
Q86YS7	C2 domain-containing protein 5	C2CD5	T	278	KEMKEIPFNEDPNPNTHSSGPSTPLKNQTYS	0.79667
Q68DN1	Uncharacterized protein C2orf16	C2orf16	S	178	MAQGLAYKGIDTVEKSVGLTPKLTGRAKESL	1
Q68DN1	Uncharacterized protein C2orf16	C2orf16	T	182	LAYKGIDTVEKSVGLTPKLTGRAKESLGMLL	1
Q9BVC5	Ashwin	C2orf49	S	189	NHDLTHRKSPSGPVKSPPLSPVGTTPVKLKR	1
Q9BVC5	Ashwin	C2orf49	S	193	THRKSPSGPVKSPPLSPVGTTPVKLKRAAPK	0.999998
Q9BVC5	Ashwin	C2orf49	S	182	NNNDAKQNHDLTHRKSPSGPVKSPPLSPVGT;RLKPPPQNHDLTHRKSPSGPVKSPPLSPVGT	0.963526
Q9BVC5	Ashwin	C2orf49	S	189	NHDLTHRKSPSGPVKSPPLSPVGTTPVKLKR	1
Q9BVC5	Ashwin	C2orf49	S	193	THRKSPSGPVKSPPLSPVGTTPVKLKRAAPK	0.999998
Q9H6K1	Uncharacterized protein C6orf106	C6orf106	S	215	TQPHRKVEGNFNPFASPQKNRQSDENNLKDP	1
Q9BRJ6	Uncharacterized protein C7orf50	C7orf50	S	175	VQKAEALMRELDEEGSDPPLPGRAQRIRQVL	1
Q5JU67	Uncharacterized protein C9orf117	C9orf117	T	166	LEEFRLQKEEVTDKFTLLEEQVRKQENEFRD	1
Q9BUH6	Protein PAXX	C9orf142	S	148	WSLERRLAAAEETAVSPRKSPRPAGPQLFLP	0.999997
Q9BUH6	Protein PAXX	C9orf142	S	152	RRLAAAEETAVSPRKSPRPAGPQLFLPDPDP	1
Q8IXQ3	Uncharacterized protein C9orf40	C9orf40	S	69	RKRKIDAGTMAEPSASPSKRRDSGDNSAPSG	0.7955
Q9NZ63	Uncharacterized protein C9orf78	C9orf78	S	261	RPLRVGDTEKPEPERSPPNRKRPANEKATDD	0.99996
P35219	Carbonic anhydrase-related protein	CA8	S	5	___________MADLSFIEDTVAFPEKEEDE	1
Q9H8G2	Caspase activity and apoptosis inhibitor 1	CAAP1	S	312	DIEKSVNEILGLAESSPNEPKAATLAVPPPE	0.949274
Q9Y6J0	Calcineurin-binding protein cabin-1	CABIN1	T	2154	SAATKFPPEITVTPPTPTLLSPKGSISEETK	0.994966
Q9Y6J0	Calcineurin-binding protein cabin-1	CABIN1	T	2156	ATKFPPEITVTPPTPTLLSPKGSISEETKQK	0.932176
O00555	Voltage-dependent P/Q-type calcium channel subunit alpha-1A	CACNA1A	Y	1421	CTDESKEFEKDCRGKYLLYEKNEVKARDREW	1
O00555	Voltage-dependent P/Q-type calcium channel subunit alpha-1A	CACNA1A	Y	1424	ESKEFEKDCRGKYLLYEKNEVKARDREWKKY	1
Q9HB71	Calcyclin-binding protein	CACYBP	S	3	_____________MASEELQKDLEEVKVLLE	1
P27708	CAD protein;Glutamine-dependent carbamoyl-phosphate synthase;Aspartate carbamoyltransferase;Dihydroorotase	CAD	S	1859	LPDGRFHLPPRIHRASDPGLPAEEPKEKSSR	1
H7BZB3		CAD	S	147	LPDGRFHLPPRIHRASDPGLPAVFLRPGAGI	1
P22676	Calretinin	CALB2	Y	243	YEKNKKEMNIQQLTNYRKSVMSLAEAGKLYR	0.769678
Q96RR4	Calcium/calmodulin-dependent protein kinase kinase 2	CAMKK2	S	100	TSGSQARPHLSGRKLSLQERSQGGLAAGGSL	1
Q96RR4	Calcium/calmodulin-dependent protein kinase kinase 2	CAMKK2	S	495	SLATVILVKTMIRKRSFGNPFEGSRREERSL	1
Q5T5Y3	Calmodulin-regulated spectrin-associated protein 1	CAMSAP1	S	1080	QDHKVKAPVHFVEPLSPTGVAGHRKAPRLGQ	0.995427
Q5T5Y3	Calmodulin-regulated spectrin-associated protein 1	CAMSAP1	S	629	ERGEGRPRSIVSRRPSEGPQPLVRRKMTGSR	1
Q5T5Y3	Calmodulin-regulated spectrin-associated protein 1	CAMSAP1	S	1052	AILKISQQQEQLLMKSPTVPVPGSKNNSQDH	0.86663
P27824	Calnexin	CANX	S	583	EDRKPKAEEDEILNRSPRNRKPRRE______	1
P27824	Calnexin	CANX	S	554	DEEEEGEEKLEEKQKSDAEEDGGTVSQEEED	1
P27824	Calnexin	CANX	S	564	EEKQKSDAEEDGGTVSQEEEDRKPKAEEDEI	0.999995
P27824	Calnexin	CANX	S	554	DEEEEGEEKLEEKQKSDAEEDGGTVSQEEED	1
P27824	Calnexin	CANX	S	564	EEKQKSDAEEDGGTVSQEEEDRKPKAEEDEI	0.999995
P52907	F-actin-capping protein subunit alpha-1	CAPZA1	S	9	_______MADFDDRVSDEEKVRIAAKFITHA	1
P47755	F-actin-capping protein subunit alpha-2	CAPZA2	S	9	_______MADLEEQLSDEEKVRIAAKFIIHA	1
P47756-2	F-actin-capping protein subunit beta	CAPZB	T	202	MNLGGSLTRQMEKDETVSDCSPHIANIGRLV	0.782233
Q9Y2V2	Calcium-regulated heat stable protein 1	CARHSP1	S	30	QASVGLLDTPRSRERSPSPLRGNVVPSPLPT	1
Q9Y2V2	Calcium-regulated heat stable protein 1	CARHSP1	S	32	SVGLLDTPRSRERSPSPLRGNVVPSPLPTRR	1
Q9Y2V2	Calcium-regulated heat stable protein 1	CARHSP1	S	41	SRERSPSPLRGNVVPSPLPTRRTRTFSATVR	0.999325
Q9Y2V2	Calcium-regulated heat stable protein 1	CARHSP1	S	30	QASVGLLDTPRSRERSPSPLRGNVVPSPLPT	1
Q9Y2V2	Calcium-regulated heat stable protein 1	CARHSP1	S	32	SVGLLDTPRSRERSPSPLRGNVVPSPLPTRR	1
Q9Y2V2	Calcium-regulated heat stable protein 1	CARHSP1	S	30	QASVGLLDTPRSRERSPSPLRGNVVPSPLPT	1
Q9Y2V2	Calcium-regulated heat stable protein 1	CARHSP1	S	32	SVGLLDTPRSRERSPSPLRGNVVPSPLPTRR	1
Q9Y2V2	Calcium-regulated heat stable protein 1	CARHSP1	S	41	SRERSPSPLRGNVVPSPLPTRRTRTFSATVR	0.999325
O15234	Protein CASC3	CASC3	S	148	EEKPDTKSTVTGERQSGDGQESTEPVENKVG	0.995027
Q8NG31	Protein CASC5	CASC5	S	1076	ELSKSATCKNIKDVQSPGFLNEPLSSKSQRR	1
Q8NG31	Protein CASC5	CASC5	T	539	IFKQDQSNVQIAAAPTPEKEMMLQNLMTTSE	1
Q92851-2	Caspase-10;Caspase-10 subunit p23/17;Caspase-10 subunit p12	CASP10	S	478	TLRKKLVFPVPLDALSL______________	1
Q92851-2	Caspase-10;Caspase-10 subunit p23/17;Caspase-10 subunit p12	CASP10	T	198	RNIEKYKREKAIQIVTPPVDKEAESYQGEEE	1
P31944	Caspase-14;Caspase-14 subunit p17, mature form;Caspase-14 subunit p10, mature form;Caspase-14 subunit p20, intermediate form;Caspase-14 subunit p8, intermediate form	CASP14	S	2	______________MSNPRSLEEEKYDMSGA	1
P31944	Caspase-14;Caspase-14 subunit p17, mature form;Caspase-14 subunit p10, mature form;Caspase-14 subunit p20, intermediate form;Caspase-14 subunit p8, intermediate form	CASP14	S	6	__________MSNPRSLEEEKYDMSGARLAL	1
P42575	Caspase-2;Caspase-2 subunit p18;Caspase-2 subunit p13;Caspase-2 subunit p12	CASP2	S	157	FPVCESCPLYKKLRLSTDTVEHSLDNKDGPV	0.835378
P49662	Caspase-4;Caspase-4 subunit 1;Caspase-4 subunit 2	CASP4	S	16	MAEGNHRKKPLKVLESLGKDFLTGVLDNLVE	1
Q9UKL3	CASP8-associated protein 2	CASP8AP2	S	20	DDNGDGTSLFDVFSASPLKNNDEGSLDIYAG	0.992957
Q9UKL3	CASP8-associated protein 2	CASP8AP2	S	567	KDLKLSFMKKLNLTLSPAKKQPVSQDNQHKI	0.999741
P04040	Catalase	CAT	S	517	AEKPKNAIHTFVQSGSHLAAREKANL_____	0.893864
O43439	Protein CBFA2T2	CBFA2T2	S	33	QWKVGPEKRVPAMPGSPVEVKIQSRSSPPTM	1
O43439-2	Protein CBFA2T2	CBFA2T2	S	4	____________MPGSPVEVKIQSRSSPPTM	1
O75081	Protein CBFA2T3	CBFA2T3	S	65	PAPVDRKAKASAMPDSPAEVKTQPRSTPPSM	1
Q13951-2	Core-binding factor subunit beta	CBFB	S	173	RSHREEMEARRQQDPSPGSNLGGGDDLKLR_	0.999939
Q13185	Chromobox protein homolog 3	CBX3	S	95	QKAGKEKDGTKRKSLSDSESDDSKSKKKRDA	0.999998
Q13185	Chromobox protein homolog 3	CBX3	S	93	NSQKAGKEKDGTKRKSLSDSESDDSKSKKKR	1
Q13185	Chromobox protein homolog 3	CBX3	S	95	QKAGKEKDGTKRKSLSDSESDDSKSKKKRDA	0.999998
Q13185	Chromobox protein homolog 3	CBX3	S	97	AGKEKDGTKRKSLSDSESDDSKSKKKRDAAD	0.9975
Q9HC52	Chromobox protein homolog 8	CBX8	S	191	RERERGTSRVDDKPSSPGDSSKKRGPKPRKE	0.982097
Q6P1N0	Coiled-coil and C2 domain-containing protein 1A	CC2D1A	S	455	EGPEDEEDEVPKKQNSPVAPTAQPKAPPSRT	0.999943
Q8IX12	Cell division cycle and apoptosis regulator protein 1	CCAR1	S	626	EQDEEEKDDGEAKEISTPTHWSKLDPKTMKV	0.886751
Q8N163	Cell cycle and apoptosis regulator protein 2	CCAR2	S	124	NAVKVQTLSNQPLLKSPAPPLLHVAALGQKQ	1
Q8N163	Cell cycle and apoptosis regulator protein 2	CCAR2	S	678	FAGAKLEDSEVRSVASNQSEMEFSSLQDMPK	0.995532
Q8N163	Cell cycle and apoptosis regulator protein 2	CCAR2	S	569	YRVYKMLLSLPEKVVSPPEPEKEEAAKEEAT	1
Q8N163	Cell cycle and apoptosis regulator protein 2	CCAR2	S	675	EEEFAGAKLEDSEVRSVASNQSEMEFSSLQD	0.892616
Q8N163	Cell cycle and apoptosis regulator protein 2	CCAR2	S	678	FAGAKLEDSEVRSVASNQSEMEFSSLQDMPK	0.995532
Q8N163	Cell cycle and apoptosis regulator protein 2	CCAR2	S	681	AKLEDSEVRSVASNQSEMEFSSLQDMPKELD	0.999658
Q96CT7	Coiled-coil domain-containing protein 124	CCDC124	S	141	VPLEENVNRRVLEEGSVEARTIEDAIAVLSV	1
Q96JG6	Coiled-coil domain-containing protein 132	CCDC132	S	494	SILQLHEFKFMEQSRSPSVSPSKQPVSTSSK	0.973948
Q96JG6	Coiled-coil domain-containing protein 132	CCDC132	S	559	YESDEQEKSAYQEYDSDSDVPEELKRDYVDE	0.950518
Q96JG6	Coiled-coil domain-containing protein 132	CCDC132	S	15	_MQKIKSLMTRQGLKSPQESLSDLGAIESLR	0.999998
Q96JG6	Coiled-coil domain-containing protein 132	CCDC132	S	494	SILQLHEFKFMEQSRSPSVSPSKQPVSTSSK	0.973948
Q96JG6	Coiled-coil domain-containing protein 132	CCDC132	S	498	LHEFKFMEQSRSPSVSPSKQPVSTSSKTVTL	0.996903
Q6PK04	Coiled-coil domain-containing protein 137	CCDC137	S	19	AGRGAAVSRVQAGPGSPRRARGRQQVQPLGK	1
Q8NCX0	Coiled-coil domain-containing protein 150	CCDC150	T	897	EKILESNKEKIKNQKTQIKLHLSAKANNAQN	1
Q0VFZ6	Coiled-coil domain-containing protein 173	CCDC173	T	318	AKKRLIQMGKEKEAETHRLMEKRRERIHNFL	1
Q8N715	Coiled-coil domain-containing protein 185	CCDC185	T	297	KAWEELKRSDQKVQMTLERERRLLLRQSQEQ	0.999998
Q96MW1	Coiled-coil domain-containing protein 43	CCDC43	T	139	EKQRKAALLAQYADVTDEEDEADEKDDSGAT	1
Q2TAC2	Coiled-coil domain-containing protein 57	CCDC57	S	202	HEFRLQADNMSNTALSRELKVKLLHKELEAL	0.805905
Q16204	Coiled-coil domain-containing protein 6	CCDC6	S	244	RILQEKLDQPVSAPPSPRDISMEIDSPENMM	0.999985
F5H0W5		CCDC77	S	4	____________MADSLESTPLPSPEDRLAK	0.999992
Q8N4S0	Coiled-coil domain-containing protein 82	CCDC82	S	131	IKHRNIDLQDQEKHLSQEDNDLNKQTGQIIE	1
Q9H6F5	Coiled-coil domain-containing protein 86	CCDC86	S	58	REPGSPPSVQRAGLGSPERPPKTSPGSPRLQ	1
Q9H6F5	Coiled-coil domain-containing protein 86	CCDC86	S	47	LVEFESNPEETREPGSPPSVQRAGLGSPERP	0.95461
Q9H6F5	Coiled-coil domain-containing protein 86	CCDC86	S	18	TPLRRSRRLGGLRPESPESLTSVSRTRRALV	0.999954
Q9H6F5	Coiled-coil domain-containing protein 86	CCDC86	S	91	AGLESPQGQPEPGAASPQRQQDLHLESPQRQ	1
A6NC98	Coiled-coil domain-containing protein 88B	CCDC88B	S	1475	PEVQEPEKRPLTPSLSQ______________	0.999996
A6NC98	Coiled-coil domain-containing protein 88B	CCDC88B	T	1471	NREGPEVQEPEKRPLTPSLSQ__________	0.998303
A6NC98	Coiled-coil domain-containing protein 88B	CCDC88B	S	600	TQESPEKAGRRSSLQSPASVAPPQGPGTKIQ	0.998079
A6NC98	Coiled-coil domain-containing protein 88B	CCDC88B	S	1475	PEVQEPEKRPLTPSLSQ______________	0.999996
A6NC98	Coiled-coil domain-containing protein 88B	CCDC88B	T	1471	NREGPEVQEPEKRPLTPSLSQ__________	0.998303
Q9Y3X0	Coiled-coil domain-containing protein 9	CCDC9	S	386	KEGAASPAPETPQPTSPETSPKETPMQPPEI	0.963347
Q9Y3X0	Coiled-coil domain-containing protein 9	CCDC9	S	202	EPNPVRNFLDDPRRRSGPLEESERDRREESR	1
Q9Y3X0	Coiled-coil domain-containing protein 9	CCDC9	S	376	YSDHDDRWETKEGAASPAPETPQPTSPETSP	1
Q9Y3X0	Coiled-coil domain-containing protein 9	CCDC9	S	386	KEGAASPAPETPQPTSPETSPKETPMQPPEI	0.963347
Q9Y3X0	Coiled-coil domain-containing protein 9	CCDC9	S	390	ASPAPETPQPTSPETSPKETPMQPPEIPAPA	0.851153
Q567U6	Coiled-coil domain-containing protein 93	CCDC93	S	305	VSEYAEKQSELSAEESPEKLGTSQLHRRKVI	1
Q9BSQ5	Cerebral cavernous malformations 2 protein	CCM2	S	384	LETIGVKDGRGIITDSFGRHRRALSTTSSST	0.996222
O95067	G2/mitotic-specific cyclin-B2	CCNB2;CCNB2V	S	92	SVKPVQMEKLAPKGPSPTPEDVSMKEENLCQ	0.99996
O96020	G1/S-specific cyclin-E2	CCNE2	S	21	SRLQAKQQPQPSQTESPQEAQIIQAKKRKTT	0.998215
P51946	Cyclin-H	CCNH	T	315	DDYVSKKSKHEEEEWTDDDLVESL_______	0.999999
O75909	Cyclin-K	CCNK	S	328	QQQPAQQPKKPSPQPSSPRQVKRAVVVSPKE	0.849968
O75909	Cyclin-K	CCNK	S	329	QQPAQQPKKPSPQPSSPRQVKRAVVVSPKEE	0.821705
O75909	Cyclin-K	CCNK	S	340	PQPSSPRQVKRAVVVSPKEENKAAEPPPPKI	1
O75909	Cyclin-K	CCNK	S	324	QPAQQQQPAQQPKKPSPQPSSPRQVKRAVVV	0.999999
O75909	Cyclin-K	CCNK	S	328	QQQPAQQPKKPSPQPSSPRQVKRAVVVSPKE	0.849968
O75909	Cyclin-K	CCNK	S	329	QQPAQQPKKPSPQPSSPRQVKRAVVVSPKEE	0.821705
Q9UK58	Cyclin-L1	CCNL1	S	65	VSLTIDHSLIPEERLSPTPSMQDGLDLPSET	0.97909
Q9UK58	Cyclin-L1	CCNL1	S	352	ASKPSSPREVKAEEKSPISINVKTVKKEPED	0.999854
Q9UK58	Cyclin-L1	CCNL1	S	355	PSSPREVKAEEKSPISINVKTVKKEPEDRQQ	0.765541
Q9UK58	Cyclin-L1	CCNL1	S	335	LNPDGTPALSTLGGFSPASKPSSPREVKAEE	0.879442
Q96S94	Cyclin-L2	CCNL2	S	369	NTKRRLEGAKKAKADSPVNGLPKGRESRSRS	1
Q96S94	Cyclin-L2	CCNL2	S	330	LLPGGTQVLDGTSGFSPAPKLVESPKEGKGS	0.998252
Q96S94	Cyclin-L2	CCNL2	S	348	PKLVESPKEGKGSKPSPLSVKNTKRRLEGAK	0.997271
O60583-2	Cyclin-T2	CCNT2	S	480	HKQGQSQAASSSSVTSPIKMKIPIANTEKYM	0.916093
Q8ND76	Cyclin-Y	CCNY	S	326	DKYKDLRRSARKRSASADNLTLPRWSPAIIS	0.983295
Q8N7R7	Cyclin-Y-like protein 1	CCNYL1	S	344	CEDKDLCRAAMRRSFSADNFIGIQRSKAILS	0.999277
O43303	Centriolar coiled-coil protein of 110 kDa	CCP110	S	366	NNVIKSLTGSYAKLPSPEPSMSPKMHRRRSR	0.999999
O43303	Centriolar coiled-coil protein of 110 kDa	CCP110	S	370	KSLTGSYAKLPSPEPSMSPKMHRRRSRTSSA	0.913073
O43303	Centriolar coiled-coil protein of 110 kDa	CCP110	S	372	LTGSYAKLPSPEPSMSPKMHRRRSRTSSACH	0.937325
O43303	Centriolar coiled-coil protein of 110 kDa	CCP110	S	366	NNVIKSLTGSYAKLPSPEPSMSPKMHRRRSR	0.999999
O43303	Centriolar coiled-coil protein of 110 kDa	CCP110	S	370	KSLTGSYAKLPSPEPSMSPKMHRRRSRTSSA	0.913073
O43303	Centriolar coiled-coil protein of 110 kDa	CCP110	S	372	LTGSYAKLPSPEPSMSPKMHRRRSRTSSACH	0.937325
Q9ULG6	Cell cycle progression protein 1	CCPG1	S	186	PSPAFRRRRARKKTVSASESEDRLVAEQETE	0.998635
Q9ULG6	Cell cycle progression protein 1	CCPG1	T	184	NQPSPAFRRRRARKKTVSASESEDRLVAEQE	0.999935
Q9ULG6	Cell cycle progression protein 1	CCPG1	S	186	PSPAFRRRRARKKTVSASESEDRLVAEQETE	0.998635
Q9ULG6	Cell cycle progression protein 1	CCPG1	S	188	PAFRRRRARKKTVSASESEDRLVAEQETEPS	0.930651
Q9ULG6	Cell cycle progression protein 1	CCPG1	T	184	NQPSPAFRRRRARKKTVSASESEDRLVAEQE	0.999935
P78371	T-complex protein 1 subunit beta	CCT2	S	5	___________MASLSLAPVNIFKAGADEER	0.999302
P78371	T-complex protein 1 subunit beta	CCT2	S	260	DTDKIKIFGSRVRVDSTAKVAEIEHAEKEKM	0.951114
P50991	T-complex protein 1 subunit delta	CCT4	S	236	CELVEGLVLTQKVSNSGITRVEKAKIGLIQF	0.996441
P48643	T-complex protein 1 subunit epsilon	CCT5	S	539	VRMILKIDDIRKPGESEE_____________	1
P48643	T-complex protein 1 subunit epsilon	CCT5	Y	420	ALCVIRNLIRDNRVVYGGGAAEISCALAVSQ	0.99321
Q99832	T-complex protein 1 subunit eta	CCT7	S	515	INALTAASEAACLIVSVDETIKNPRSTVDAP	0.916603
Q99832	T-complex protein 1 subunit eta	CCT7	T	300	GAKVVLSKLPIGDVATQYFADRDMFCAGRVP	0.997574
Q99832	T-complex protein 1 subunit eta	CCT7	T	4	____________MMPTPVILLKEGTDSSQGI	1
P86791	Vacuolar fusion protein CCZ1 homolog;Vacuolar fusion protein CCZ1 homolog B	CCZ1;CCZ1B	S	266	SLFPRHIEPELAGRDSPIRAEMPGNLQHYGR	1
Q9NNX6	CD209 antigen	CD209	S	307	VVIKSAEEQNFLQLQSSRSNRFTWMGLSDLN	1
Q9NNX6	CD209 antigen	CD209	S	308	VIKSAEEQNFLQLQSSRSNRFTWMGLSDLNQ	1
O95400	CD2 antigen cytoplasmic tail-binding protein 2	CD2BP2	S	194	GARGGGKGRKGPGQPSSPQRLDRLSGLADQM	0.751176
O95400	CD2 antigen cytoplasmic tail-binding protein 2	CD2BP2	S	195	ARGGGKGRKGPGQPSSPQRLDRLSGLADQMV	0.983575
P20138	Myeloid cell surface antigen CD33	CD33	S	307	TAVGRNDTHPTTGSASPKHQKKSKLHGPTET	0.988504
O15446	DNA-directed RNA polymerase I subunit RPA34	CD3EAP	S	136	PQQSLSGSPLQPIPASPPPQIPPGLRPRFCA	0.999877
O15446	DNA-directed RNA polymerase I subunit RPA34	CD3EAP	S	285	KQEQINTEPLEDTVLSPTKKRKRQKGTEGME	0.926192
P16070	CD44 antigen	CD44	S	697	LVINSGNGAVEDRKPSGLNGEASKSQEMVHL	0.99992
P16070	CD44 antigen	CD44	S	704	GAVEDRKPSGLNGEASKSQEMVHLVNKESSE	0.765634
P16070	CD44 antigen	CD44	S	706	VEDRKPSGLNGEASKSQEMVHLVNKESSETP	1
Q8IWY9	Codanin-1	CDAN1	S	285	CPTPELGSPLPSRTGSLTDEPADPARVSSRQ	0.953114
Q12834	Cell division cycle protein 20 homolog	CDC20	T	106	ASFLLSKENQPENSQTPTKKEHQKAWALNLN	0.989375
Q9UJX2	Cell division cycle protein 23 homolog	CDC23	S	588	LPASLSANNTPTRRVSPLNLSSVTP______	0.999869
P30307	M-phase inducer phosphatase 3	CDC25C	S	168	NDNGNLVDSEMKYLGSPITTVPKLDKNPNLG	0.997639
Q99741	Cell division control protein 6 homolog	CDC6	S	54	VQTVTCSPRVKALPLSPRKRLGDDNLCNTPH	1
Q99741	Cell division control protein 6 homolog	CDC6	S	419	DVKSQTILKPLSECKSPSEPLIPKRVGLIHI	0.77327
Q69YH5	Cell division cycle-associated protein 2	CDCA2	S	756	AGGQNAENLCQFFKISPDLNIKCERKDDFLG	1
Q69YH5	Cell division cycle-associated protein 2	CDCA2	S	400	LNMRKRKRVTFGEDLSPEVFDESLPANTPLR	0.939309
Q99618	Cell division cycle-associated protein 3	CDCA3	S	222	DNSPGTLTLRQGKRPSPLSENVSELKEGAIL	0.999689
Q96FF9	Sororin	CDCA5	S	75	LKRIVAHAVEVPAVQSPRRSPRISFFLEKEN	1
Q96GN5	Cell division cycle-associated 7-like protein	CDCA7L	S	117	VVESDLSDDGKASLVSEEEEDEEEDKATPRR	1
Q53HL2	Borealin	CDCA8	T	106	LDITEINKLTAEAIQTPLKSAKTRKVIQVDE	1
P06493	Cyclin-dependent kinase 1	CDK1;CDC2	S	39	KTTGQVVAMKKIRLESEEEGVPSTAIREISL	0.999953
P06493	Cyclin-dependent kinase 1;Cyclin-dependent kinase 2;Cyclin-dependent kinase 3	CDK1;CDC2;CDK3;CDK2	Y	15	_MEDYTKIEKIGEGTYGVVYKGRHKTTGQVV;_MENFQKVEKIGEGTYGVVYKARNKLTGEVV	1
P06493	Cyclin-dependent kinase 1;Cyclin-dependent kinase 2;Cyclin-dependent kinase 3	CDK1;CDC2;CDK3;CDK2	T	14	__MEDYTKIEKIGEGTYGVVYKGRHKTTGQV;__MENFQKVEKIGEGTYGVVYKARNKLTGEV	1
P06493	Cyclin-dependent kinase 1;Cyclin-dependent kinase 2;Cyclin-dependent kinase 3	CDK1;CDC2;CDK3;CDK2	Y	15	_MEDYTKIEKIGEGTYGVVYKGRHKTTGQVV;_MENFQKVEKIGEGTYGVVYKARNKLTGEVV	1
Q9UQ88	Cyclin-dependent kinase 11A	CDK11A	T	583	DFGLAREYGSPLKAYTPVVVTQWYRAPELLL	0.999978
P21127	Cyclin-dependent kinase 11B;Cyclin-dependent kinase 11A	CDK11B;CDC2L1;CDK11A	S	47	IKRLKNSDDRDSKRDSLEEGELRDHCMEITI;IKRLKNSDDRDSKRDSLEEGELRDHRMEITI	1
P21127	Cyclin-dependent kinase 11B;Cyclin-dependent kinase 11A	CDK11B;CDC2L1;CDK11A	S	283	EKMEERDLLSDLQDISDSERKTSSAESSSAE	0.989556
P21127	Cyclin-dependent kinase 11B;Cyclin-dependent kinase 11A	CDK11B;CDC2L1;CDK11A	S	752	TWPAKSEQQRVKRGTSPRPPEGGLGYSQLGD	1
P21127	Cyclin-dependent kinase 11B;Cyclin-dependent kinase 11A	CDK11B;CDC2L1;CDK11A	S	589	GILKVGDFGLAREYGSPLKAYTPVVVTLWYR;GILKVGDFGLAREYGSPLKAYTPVVVTQWYR	1
P21127	Cyclin-dependent kinase 11B;Cyclin-dependent kinase 11A	CDK11B;CDC2L1;CDK11A	T	751	PTWPAKSEQQRVKRGTSPRPPEGGLGYSQLG	1
P21127	Cyclin-dependent kinase 11B;Cyclin-dependent kinase 11A	CDK11B;CDC2L1;CDK11A	S	752	TWPAKSEQQRVKRGTSPRPPEGGLGYSQLGD	1
P21127	Cyclin-dependent kinase 11B;Cyclin-dependent kinase 11A	CDK11B;CDC2L1;CDK11A	T	751	PTWPAKSEQQRVKRGTSPRPPEGGLGYSQLG	1
Q9NYV4-2	Cyclin-dependent kinase 12	CDK12	S	423	AAAAAAKMDGKESKGSPVFLPRKENSSVEAK	1
Q9NYV4-2	Cyclin-dependent kinase 12	CDK12	S	1083	KETTSGTSTEPVKNSSPAPPQPAPGKVESGA	0.999915
Q9NYV4-2	Cyclin-dependent kinase 12	CDK12	T	692	GGDLSPPDSPEPKAITPPQQPYKKRPKICCP	1
Q9NYV4-2	Cyclin-dependent kinase 12	CDK12	T	1244	ENNSDKNSGPQGPRRTPTMPQEEAAEKRPPE	0.963325
Q9NYV4-2	Cyclin-dependent kinase 12	CDK12	S	383	SHSKKKRSSSRSRHSSISPVRLPLNSSLGAE	0.882405
Q9NYV4-2	Cyclin-dependent kinase 12	CDK12	S	385	SKKKRSSSRSRHSSISPVRLPLNSSLGAELS	0.999153
Q9NYV4-2	Cyclin-dependent kinase 12	CDK12	S	345	RRSSSPFLSKRSLSRSPLPSRKSMKSRSRSP	0.985511
Q14004	Cyclin-dependent kinase 13	CDK13	S	437	SRSRHRLSRSRSRHSSISPSTLTLKSSLAAE	0.9898
Q14004	Cyclin-dependent kinase 13	CDK13	S	439	SRHRLSRSRSRHSSISPSTLTLKSSLAAELN	0.94633
Q14004	Cyclin-dependent kinase 13	CDK13	S	315	YREDKTEPKAYRRRRSLSPLGGRDDSPVSHR	1
Q14004	Cyclin-dependent kinase 13	CDK13	S	317	EDKTEPKAYRRRRSLSPLGGRDDSPVSHRAS	1
Q00536	Cyclin-dependent kinase 16	CDK16	S	153	SPIFDKPLSRRLRRVSLSEIGFGKLETYIKL	0.997879
Q00536	Cyclin-dependent kinase 16;Cyclin-dependent kinase 17	CDK16;CDK17	T	175	GKLETYIKLDKLGEGTYATVYKGKSKLTDNL	0.817643
P50613	Cyclin-dependent kinase 7	CDK7	T	170	DFGLAKSFGSPNRAYTHQVVTRWYRAPELLF	0.993953
P50750-2	Cyclin-dependent kinase 9	CDK9	S	464	LTSMFEYLAPPRRKGSQITQQSTNQSRNPAT	0.999981
P50750-2	Cyclin-dependent kinase 9	CDK9	S	56	GASAAPAPPGLSGTTSPRGPGGGRRAEEAGS	0.83862
P50750-2	Cyclin-dependent kinase 9	CDK9	T	303	ARAFSLAKNSQPNRYTNRVVTLWYRPPELLL	0.999999
Q9NXV6	CDKN2A-interacting protein	CDKN2AIP	S	131	TTRDELVAKVKKRGISSSNEGVEEPSKKRVI	0.919351
O95674	Phosphatidate cytidylyltransferase 2	CDS2	S	33	DKESESEAKVDGETASDSESRAESAPLPVSA	0.974177
Q9UKY7	Protein CDV3 homolog	CDV3	S	8	________MAETEERSLDNFFAKRDKKKKKE	0.999999
Q99626	Homeobox protein CDX-2	CDX2	S	4	____________MYVSYLLDKDVSMYPSSVR	0.998687
Q9Y232-2	Chromodomain Y-like protein	CDYL	S	162	SPVKSRTAVDGFQSESPEKLDPVEQGQEDTV	1
Q15744	CCAAT/enhancer-binding protein epsilon	CEBPE	S	181	LRVLKAPLATAAPPCSPLLKAPSPAGPLHKG	1
Q15744	CCAAT/enhancer-binding protein epsilon	CEBPE	S	188	LATAAPPCSPLLKAPSPAGPLHKGKKAVNKD	1
Q92879	CUGBP Elav-like family member 1	CELF1	S	28	LDAIKMFVGQVPRTWSEKDLRELFEQYGAVY	0.992395
Q92879	CUGBP Elav-like family member 1	CELF1	T	26	PDLDAIKMFVGQVPRTWSEKDLRELFEQYGA	0.865119
P49450	Histone H3-like centromeric protein A	CENPA	S	17	GPRRRSRKPEAPRRRSPSPTPTPGPSRRGPS	1
P49450	Histone H3-like centromeric protein A	CENPA	S	19	RRRSRKPEAPRRRSPSPTPTPGPSRRGPSLG	0.999911
P49450	Histone H3-like centromeric protein A	CENPA	S	17	GPRRRSRKPEAPRRRSPSPTPTPGPSRRGPS	1
P49450	Histone H3-like centromeric protein A	CENPA	S	19	RRRSRKPEAPRRRSPSPTPTPGPSRRGPSLG	0.999911
Q03188	Centromere protein C	CENPC	S	225	DDKVMLKKIEIDNKVSDEEDKTSEGQERKPS	1
Q03188	Centromere protein C	CENPC	S	709	LMSGKNDVDDEEVHGSSDDSKQSKVIPKNRI	0.961363
P49454	Centromere protein F	CENPF	S	3119	ATRTSPRLAAQKLALSPLSLGKENLAESSKP	0.999846
P49454	Centromere protein F	CENPF	S	3150	TAGGSRSQKVKVAQRSPVDSGTILREPTTKS	0.99999
Q92674	Centromere protein I	CENPI	S	284	WKTALLAVKQRNRGPSPEPLKLMLGPANVRP	1
Q9HC77	Centromere protein J	CENPJ	S	759	TRTQEDKRRDVDLDLSDKDYSSDESIMESIK	1
Q9HC77	Centromere protein J	CENPJ	S	469	SQKPKMLKCSNRKSLSPSGLKIQTGKKCDGQ	0.999179
Q96BT3	Centromere protein T	CENPT	S	47	RSARAGARRALLETASPRKLSGQTRTIARGR	0.995254
Q71F23	Centromere protein U	CENPU;MLF1IP	S	108	LSLSSTPPGKEAKRSSDTSGNEASEIESVKI	0.980734
Q71F23	Centromere protein U	CENPU;MLF1IP	S	111	SSTPPGKEAKRSSDTSGNEASEIESVKISAK	0.997852
Q9UPN4	Centrosomal protein of 131 kDa	CEP131	S	114	LMLFEGSPSGKKRPASLSTAPSEKGATWNVL	0.992127
O94986	Centrosomal protein of 152 kDa	CEP152	S	1552	KCNPLMESENAASEKSQGLDVQEPPVKDGGD	1
O94986	Centrosomal protein of 152 kDa	CEP152	T	1351	MNAASKLATMAKLLETPISSKSQSKTTQSAL	0.992015
Q5SW79	Centrosomal protein of 170 kDa	CEP170	S	379	YLKRLKGNKHDDGTQSDSENAGAHRRCSKRA	0.99089
Q5SW79	Centrosomal protein of 170 kDa	CEP170	S	1112	PTRTSLLRRARLGEASDSELADADKASVASE	0.997136
Q5SW79	Centrosomal protein of 170 kDa	CEP170	S	488	QEMDKMLKNQATSATSEKDNDDDQSDKGTYT	0.974698
Q5SW79	Centrosomal protein of 170 kDa	CEP170	S	1165	LAQPRRTRLGSLSARSDSEATISRSSASSRT	0.897603
Q5SW79	Centrosomal protein of 170 kDa	CEP170	S	667	EKSLESHRAKVVTQRSEIGEKQDTELQEKET	0.975513
Q5SW79	Centrosomal protein of 170 kDa	CEP170	T	760	LAKLQQQEQREEAQWTPTKLSSKNVSGQTDK	0.896495
Q5VT06	Centrosome-associated protein 350	CEP350	S	2460	SIHSNVHSDRLLELKSPTELMKSKERSDVEH	0.923359
Q8TAP6	Centrosomal protein of 76 kDa	CEP76	S	83	ELNFVTDSVEQELPSSPKQPICFDRQSTLKK	0.920833
P41208	Centrin-2	CETN2	S	20	FKKANMASSSQRKRMSPKPELTEEQKQEIRE	1
P23528	Cofilin-1	CFL1	S	3	_____________MASGVAVSDGVIKVFNDM	1
P23528	Cofilin-1	CFL1	Y	140	KKKLTGIKHELQANCYEEVKDRCTLAEKLGG	1
Q13111	Chromatin assembly factor 1 subunit A	CHAF1A	S	772	FQEHCRRGLLSNHTGSPRSPSTTYLHTPTPS	0.998562
Q13111	Chromatin assembly factor 1 subunit A	CHAF1A	S	141	QPDSLVDHNKLNSEASPSREAINGQREDTGD	0.996943
Q13112	Chromatin assembly factor 1 subunit B	CHAF1B	S	458	PTVIRDPPSITPAVKSPLPGPSEEKTLQPSS	1
Q96JM3	Chromosome alignment-maintaining phosphoprotein 1	CHAMP1	S	627	LFPSSKKLKKDNQESSDAELSSSEYIKTDLD	0.999017
Q96JM3	Chromosome alignment-maintaining phosphoprotein 1	CHAMP1	S	204	KSVPVCESQKLAPVPSPEPQKPAPVSPESVK	1
Q96JM3	Chromosome alignment-maintaining phosphoprotein 1	CHAMP1	S	675	VESIDFSKENKMDMTSPEQSRNVLQFTEEKE	0.848349
Q96JM3	Chromosome alignment-maintaining phosphoprotein 1	CHAMP1	S	382	SASWKSSSVSPSSWKSPPASPESWKSGPPEL	1
Q96JM3	Chromosome alignment-maintaining phosphoprotein 1	CHAMP1	S	386	KSSSVSPSSWKSPPASPESWKSGPPELRKTA	0.99999
Q96JM3	Chromosome alignment-maintaining phosphoprotein 1	CHAMP1	S	108	DKPKNQLNKETDPVKSPPLPEHQKIPCNSAE	1
Q96JM3	Chromosome alignment-maintaining phosphoprotein 1	CHAMP1	S	476	ASLDFPESQKSSRGGSPDLWKSSFFIEPQKP	0.997796
Q96JM3	Chromosome alignment-maintaining phosphoprotein 1	CHAMP1	S	376	PTPSVSSASWKSSSVSPSSWKSPPASPESWK	0.847103
Q96JM3	Chromosome alignment-maintaining phosphoprotein 1	CHAMP1	S	542	KPALFPEPAKTAPPASPEARKRALFPEPRKH	0.999998
Q96JM3	Chromosome alignment-maintaining phosphoprotein 1	CHAMP1	S	405	WKSGPPELRKTAPTLSPEHWKAVPPVSPELR	0.999629
Q96JM3	Chromosome alignment-maintaining phosphoprotein 1	CHAMP1	S	627	LFPSSKKLKKDNQESSDAELSSSEYIKTDLD	0.999017
Q96JM3	Chromosome alignment-maintaining phosphoprotein 1	CHAMP1	S	632	KKLKKDNQESSDAELSSSEYIKTDLDAMDIK	0.90675
Q96JM3	Chromosome alignment-maintaining phosphoprotein 1	CHAMP1	S	651	YIKTDLDAMDIKGQESSSDQEQVDVESIDFS	0.960568
Q96JM3	Chromosome alignment-maintaining phosphoprotein 1	CHAMP1	S	653	KTDLDAMDIKGQESSSDQEQVDVESIDFSKE	0.993294
Q96JM3	Chromosome alignment-maintaining phosphoprotein 1	CHAMP1	S	204	KSVPVCESQKLAPVPSPEPQKPAPVSPESVK	1
Q96JM3	Chromosome alignment-maintaining phosphoprotein 1	CHAMP1	S	214	LAPVPSPEPQKPAPVSPESVKATLSNPKPQK	0.994872
Q96JM3	Chromosome alignment-maintaining phosphoprotein 1	CHAMP1	S	382	SASWKSSSVSPSSWKSPPASPESWKSGPPEL	1
Q96JM3	Chromosome alignment-maintaining phosphoprotein 1	CHAMP1	S	386	KSSSVSPSSWKSPPASPESWKSGPPELRKTA	0.99999
Q96JM3	Chromosome alignment-maintaining phosphoprotein 1	CHAMP1	S	471	RKTSPASLDFPESQKSSRGGSPDLWKSSFFI	0.85413
Q96JM3	Chromosome alignment-maintaining phosphoprotein 1	CHAMP1	S	472	KTSPASLDFPESQKSSRGGSPDLWKSSFFIE	0.881313
Q9BRQ6	MICOS complex subunit MIC25	CHCHD6	S	13	___MGSTESSEGRRVSFGVDEEERVRVLQGV	1
Q86WJ1	Chromodomain-helicase-DNA-binding protein 1-like	CHD1L	S	636	IPGLVEGSTKRKRVLSPEELEDRQKKRQEAA	1
Q12873	Chromodomain-helicase-DNA-binding protein 3	CHD3	S	713	YKKKKKELQGDGPPSSPTNDPTVKYETQPRF	0.995308
Q12873	Chromodomain-helicase-DNA-binding protein 3	CHD3	S	1601	NSRIGEKMETEADAPSPAPSLGERLEPRKIP	0.995
Q12873	Chromodomain-helicase-DNA-binding protein 3	CHD3	S	274	KTKEGKGPGHKRRSKSPRVPDGRKKLRGKKM	1
Q12873	Chromodomain-helicase-DNA-binding protein 3	CHD3	T	1569	KPATPAPSEKGEGIRTPLEKEEAENQEEKPE	1
H7C0J3		CHD3	S	371	RPRGRPPAQALGPAASPPPSPPLGPSLG___	0.999918
H7C0J3		CHD3	S	375	RPPAQALGPAASPPPSPPLGPSLG_______	0.996321
Q14839	Chromodomain-helicase-DNA-binding protein 4	CHD4	S	277	TKEGKGPNARRKPKGSPRVPDAKKPKPKKVA	1
Q14839	Chromodomain-helicase-DNA-binding protein 4	CHD4	S	1570	APVPPAEDGIKIEENSLKEEESIEGEKEVKS	1
Q14839	Chromodomain-helicase-DNA-binding protein 4	CHD4	S	1531	WSMPELAEVEENKKMSQPGSPSPKTPTPSTP	1
Q14839	Chromodomain-helicase-DNA-binding protein 4	CHD4	S	1535	ELAEVEENKKMSQPGSPSPKTPTPSTPGDTQ	1
Q14839	Chromodomain-helicase-DNA-binding protein 4	CHD4	S	1537	AEVEENKKMSQPGSPSPKTPTPSTPGDTQPN	1
Q14839	Chromodomain-helicase-DNA-binding protein 4	CHD4	T	1679	KEEEEKKEVMLQNGETPKDLNDEKQKKNIKQ	1
Q14839	Chromodomain-helicase-DNA-binding protein 4	CHD4	T	703	KLKKVKLRKLERPPETPTVDPTVKYERQPEY	0.99166
Q14839	Chromodomain-helicase-DNA-binding protein 4	CHD4	T	1540	EENKKMSQPGSPSPKTPTPSTPGDTQPNTPA	0.923061
Q14839	Chromodomain-helicase-DNA-binding protein 4	CHD4	S	1531	WSMPELAEVEENKKMSQPGSPSPKTPTPSTP	1
Q14839	Chromodomain-helicase-DNA-binding protein 4	CHD4	S	1535	ELAEVEENKKMSQPGSPSPKTPTPSTPGDTQ	1
Q14839	Chromodomain-helicase-DNA-binding protein 4	CHD4	S	1537	AEVEENKKMSQPGSPSPKTPTPSTPGDTQPN	1
Q14839	Chromodomain-helicase-DNA-binding protein 4	CHD4	S	1531	WSMPELAEVEENKKMSQPGSPSPKTPTPSTP	1
Q14839	Chromodomain-helicase-DNA-binding protein 4	CHD4	S	1535	ELAEVEENKKMSQPGSPSPKTPTPSTPGDTQ	1
Q14839	Chromodomain-helicase-DNA-binding protein 4	CHD4	S	1537	AEVEENKKMSQPGSPSPKTPTPSTPGDTQPN	1
Q9P2D1	Chromodomain-helicase-DNA-binding protein 7	CHD7	S	1874	PTRTPFKDEIDEFANSPSEDKEESMEIHATG	0.996365
Q9P2D1	Chromodomain-helicase-DNA-binding protein 7	CHD7	S	2956	KAEGGPFKDGETLEGSDAEESLDKTAESSLL	0.999993
Q9P2D1	Chromodomain-helicase-DNA-binding protein 7	CHD7	S	2229	VKNELKGVEVGADTGSKSISEKGSEEDEEEK	0.806412
Q9P2D1	Chromodomain-helicase-DNA-binding protein 7	CHD7	S	2533	NVEGLDLLFMSHKRTSLSAEDAEVTKAFEED	0.935111
Q9HCK8	Chromodomain-helicase-DNA-binding protein 8	CHD8	S	2519	HHHHHPGLRAPGYPSSPVTTASGTTLRLPPL	0.996264
Q9HCK8	Chromodomain-helicase-DNA-binding protein 8	CHD8	S	2008	TASPLPLRPDAPVEKSPEETATQVPSLESLT	1
Q9HCK8	Chromodomain-helicase-DNA-binding protein 8	CHD8	S	2069	VSRSVPPVKLEDEDDSDSELDLSKLSPSSSS	0.999941
Q9HCK8	Chromodomain-helicase-DNA-binding protein 8	CHD8	S	2071	RSVPPVKLEDEDDSDSELDLSKLSPSSSSSS	0.998744
Q3L8U1	Chromodomain-helicase-DNA-binding protein 9	CHD9	S	1468	QTRPFSATKDELAELSEAESEGDEKPKLRRP	1
Q3L8U1	Chromodomain-helicase-DNA-binding protein 9	CHD9	S	1472	FSATKDELAELSEAESEGDEKPKLRRPCDRS	1
Q3L8U1	Chromodomain-helicase-DNA-binding protein 9	CHD9	S	519	QVRVMSEKKQRKKVESESKQEKANRIISEAI	1
Q3L8U1	Chromodomain-helicase-DNA-binding protein 9	CHD9	S	521	RVMSEKKQRKKVESESKQEKANRIISEAIAK	1
Q9UQN3	Charged multivesicular body protein 2b	CHMP2B	S	199	AARSLPSASTSKATISDEEIERQLKALGVD_	0.999988
Q9H444	Charged multivesicular body protein 4b	CHMP4B	S	223	EEEDDDMKELENWAGSM______________	1
Q86X52	Chondroitin sulfate synthase 1	CHSY1	Y	590	DSNPDKAKQVELMRDYRIKYPKADMQILPVS	1
Q6FI81	Anamorsin	CIAPIN1	S	305	YLGMPAFKPGEKVLLSDSNLHDA________	0.960427
I3L2J0	Protein capicua homolog	CIC	S	1405	GEDPEGNKGFGRKVFSPVIRSSFTHCRPPLD	1
O14578-4	Citron Rho-interacting kinase	CIT	S	440	LGILGRSESVVSGLDSPAKTSSMEKKLLIKS	1
O14578-4	Citron Rho-interacting kinase	CIT	S	1474	YATHFTEAFCRDKMNSPGLQTKEPSSSLHLE	1
Q9ULV3	Cip1-interacting zinc finger protein	CIZ1	S	350	TQVQPKLQKQAQTQTSPEHLVLQQKQVQPQL	0.968333
Q7Z460-4	CLIP-associating protein 1	CLASP1	S	1135	SLRGVTEAIEKFSFRSQEDLNEPIKRDGKKE	0.999991
Q7Z460-4	CLIP-associating protein 1	CLASP1	S	662	EYIGLDSGRIRTRRQSSGSATNVASTPDNRG	0.97656
Q7Z460-4	CLIP-associating protein 1	CLASP1	S	695	RAKVVSQSQPGSRSSSPGKLLGSGYGGLTGG	0.922258
E7ERI8	CLIP-associating protein 2	CLASP2	S	663	LDGTASEDGRVRAKLSAPLAGMGNAKADSRG	1
Q8N2M8	CLK4-associating serine/arginine rich protein	CLASRP	S	547	PSPSPAREKLTRPAASPAVGEKLKKTEPAAG	0.999986
Q96S66	Chloride channel CLIC-like protein 1	CLCC1	T	482	LDTKPKETGGILGEGTPKESSTESSQSAKPV	0.999995
Q2KHT3	Protein CLEC16A	CLEC16A	S	863	TQHLPFRFYDQGRRGSSDPTVQRSVFASVDK	0.979292
O14967	Calmegin	CLGN	S	591	SNKSGSEDEMKEADESTGSGDGPIKSVRKRR	0.940283
O00299	Chloride intracellular channel protein 1	CLIC1	S	121	AGLDIFAKFSAYIKNSNPALNDNLEKGLLKA	1
Q9Y696	Chloride intracellular channel protein 4	CLIC4	S	4	____________MALSMPLNGLKEEDKEPLI	1
Q14677	Clathrin interactor 1	CLINT1	S	299	TIDLGAAAHYTGDKASPDQNASTHTPQSSVK	1
Q14677	Clathrin interactor 1	CLINT1	S	210	FPFSDKLGELSDKIGSTIDDTISKFRRKDRE	0.99836
Q14677	Clathrin interactor 1	CLINT1	S	205	KNKSAFPFSDKLGELSDKIGSTIDDTISKFR	1
Q14677	Clathrin interactor 1	CLINT1	T	211	PFSDKLGELSDKIGSTIDDTISKFRRKDRED	0.920421
Q14677	Clathrin interactor 1	CLINT1	S	299	TIDLGAAAHYTGDKASPDQNASTHTPQSSVK	1
Q14677	Clathrin interactor 1	CLINT1	T	308	YTGDKASPDQNASTHTPQSSVKTSVPSSKSS	0.942714
P30622	CAP-Gly domain-containing linker protein 1;CAP-Gly domain-containing linker protein 2	CLIP1;CLIP2	S	348	SGLLTETSSRYARKISGTTALQEALKEKQQH;TGLLTETSSRYARKISGTTALQEALKEKQQH	0.99882
P49761	Dual specificity protein kinase CLK3	CLK3	S	281	CSSASSRSQQSSKRSSRSVEDDKEGHLVCRI	0.943699
P49761	Dual specificity protein kinase CLK3	CLK3	S	283	SASSRSQQSSKRSSRSVEDDKEGHLVCRIGD	0.999676
Q13286	Battenin	CLN3	S	12	____MGGCAGSRRRFSDSEGEETVPEPRLPL	1
Q13286	Battenin	CLN3	S	12	____MGGCAGSRRRFSDSEGEETVPEPRLPL	1
Q13286	Battenin	CLN3	S	14	__MGGCAGSRRRFSDSEGEETVPEPRLPLLD	0.999951
Q9NWW5	Ceroid-lipofuscinosis neuronal protein 6	CLN6	S	31	PGAQLGASFLQARHGSVSADEAARTAPFHLD	0.999996
P54105	Methylosome subunit pICln	CLNS1A	S	102	EEESKEPVADEEEEDSDDDVEPITEFRFVPS	1
Q9HAW4	Claspin	CLSPN	S	950	ENMEELLNLCSGKFTSQDASTPASSELNKQE	0.981087
Q9HAW4	Claspin	CLSPN	S	1316	KSQVKKRGPSFMTSPSPKHLKTDDSTSGLTR	0.997831
Q9HAW4	Claspin	CLSPN	S	810	RGTSFFPTAGGFRSPSPGLFRASLVSSASKS	0.99999
Q9HAW4	Claspin	CLSPN	S	65	IFVSKKLKNRKVLQDSDSETEDTNASPEKTT	0.999998
Q9HAW4	Claspin	CLSPN	S	67	VSKKLKNRKVLQDSDSETEDTNASPEKTTYD	0.994245
Q00610	Clathrin heavy chain 1;Clathrin heavy chain	CLTC	T	394	EAAKVAANAPKGILRTPDTIRRFQSVPAQPG	0.997772
Q8N1G2	Cap-specific mRNA (nucleoside-2'-O-)-methyltransferase 1	CMTR1	S	53	SVSHGAKASTTSLSGSDSETEGKQHSSDSFD	0.929926
Q9NZN8	CCR4-NOT transcription complex subunit 2	CNOT2	S	165	GIPSRTNSMSSSGLGSPNRSSPSIICMPKQQ	0.960933
O75175	CCR4-NOT transcription complex subunit 3	CNOT3	S	299	DDKKRGRSTDSEVSQSPAKNGSKPVHSNQHP	0.998734
O95628-8	CCR4-NOT transcription complex subunit 4	CNOT4	S	4	____________MSRSPDAKEDPVECPLCME	0.860904
P09543	2',3'-cyclic-nucleotide 3'-phosphodiesterase	CNP	S	170	RLDCAQLKEKNQWQLSADDLKKLKPGLEKDF	1
Q9BT09	Protein canopy homolog 3	CNPY3	S	268	EGDPSPEEDEGIQKASPLTHSPPDEL_____	0.998293
Q8WTW3	Conserved oligomeric Golgi complex subunit 1	COG1	S	7	_________MATAATSPALKRLDLRDPAALF	0.878509
Q8WTW3	Conserved oligomeric Golgi complex subunit 1	COG1	S	548	LAYLPSDDSSLPKDVSPTQAKSSAFDRYADA	0.999927
Q8WTW3	Conserved oligomeric Golgi complex subunit 1	COG1	S	459	LLVSALQELESSTSNSPSNKHIHFEYNMSLF	0.778446
Q96JB2	Conserved oligomeric Golgi complex subunit 3	COG3	S	663	KILNPMTVPRFFRLNSNNALIEFLLEGTPEI	1
Q9H9E3	Conserved oligomeric Golgi complex subunit 4	COG4	S	6	__________MADLDSPPKLSGVQQPSEGVG	1
Q9UP83-2	Conserved oligomeric Golgi complex subunit 5	COG5	S	197	ILNLSKRLQGQLQGGSREITKAAQSLNELDY	0.991312
P38432	Coilin	COIL	S	566	TVFWKELIDPRLIIESPSNTSSTEPA_____	0.998947
P38432	Coilin	COIL	S	271	SISDGPSKVTLEARNSSEKLPTELSKEEPST	0.94283
P38432	Coilin	COIL	T	303	NTTADKLAIKLGFSLTPSKGKTSGTTSSSSD	0.996774
Q14993	Collagen alpha-1(XIX) chain	COL19A1	S	81	RRAFCESDKTCFKLGSALLIRDTIKIFPKGL	1
P21964	Catechol O-methyltransferase	COMT	S	267	EVVDGLEKAIYKGPGSEAGP___________	1
P53621	Coatomer subunit alpha;Xenin;Proxenin	COPA	S	402	ENSTYDLYTIPKDADSQNPDAPEGKRSSGLT	1
P35606	Coatomer subunit beta'	COPB2	S	859	PSRSTAQQELDGKPASPTPVIVASHTANKEE	0.999448
O14579	Coatomer subunit epsilon	COPE	S	10	______MAPPAPGPASGGSGEVDELFDVKNA	0.800173
P31146	Coronin-1A	CORO1A	S	426	DTGRRRAAPEASGTPSSDAVSRLEEEMRKLQ	0.798366
A0A0A6YYL4	Coronin;Coronin-7	CORO7-PAM16;CORO7	S	806	DVREVELMRCLRLRQSSLEPVAFRLPRVRKE	0.98385
A0A0A6YYL4	Coronin;Coronin-7	CORO7-PAM16;CORO7	S	21	VSKFRHTEARPPRRESWISDIRAGTAPSCRN	0.990652
Q10570	Cleavage and polyadenylation specificity factor subunit 1	CPSF1	S	766	SGSLFSPSKEEARRSSQPPADRDPAPFRAEP	0.972075
Q9BSW2-2	EF-hand calcium-binding domain-containing protein 4B	CRACR2A	S	521	QGQIPEAPPLKLTPTSPRGQPVGKEALCKEE	0.972547
Q9BSW2-2	EF-hand calcium-binding domain-containing protein 4B	CRACR2A	S	521	QGQIPEAPPLKLTPTSPRGQPVGKEALCKEE	0.972547
Q9BSW2-2	EF-hand calcium-binding domain-containing protein 4B	CRACR2A	T	518	QGVQGQIPEAPPLKLTPTSPRGQPVGKEALC	0.991406
Q96RY5	Protein cramped-like	CRAMP1L	S	645	KDLADAPAEELQEKGSPAGPPPSQGQPAARP	0.999994
P46109	Crk-like protein	CRKL	S	185	VGMIPVPYVEKLVRSSPHGKHGNRNSNSYGI	0.753617
Q5TZA2	Rootletin	CROCC	S	1688	SDREAQAQALQDRVDSLQRQVADSEVKAGTL	1
Q53ET0	CREB-regulated transcription coactivator 2	CRTC2	S	433	ASTPGASPHHRRVPLSPLSLLAGPADARRSQ	0.999981
Q6UUV7	CREB-regulated transcription coactivator 3	CRTC3	S	4	____________MAASPGSGSANPRKFSEKI	0.999052
O75534	Cold shock domain-containing protein E1	CSDE1	S	482	KLTIAFQAKDVEGSTSPQIGDKVEFSISDKQ	0.931912
P48729-3	Casein kinase I isoform alpha	CSNK1A1	T	321	AQQAASSSGQGQQAQTPTGF___________	0.899803
P49674	Casein kinase I isoform epsilon	CSNK1E	S	363	VASTPASRIQPAGNTSPRAISRVDRERKVSM	0.896928
Q1MSJ5	Centrosome and spindle pole-associated protein 1	CSPP1	S	920	IIRSFIHESSMSRAQSPPVPARKNQLRAEEE	1
P21291	Cysteine and glycine-rich protein 1	CSRP1	S	192	PKGFGFGQGAGALVHSE______________	1
Q12996	Cleavage stimulation factor subunit 3	CSTF3	S	691	SNAVLTKAVKRPNEDSDEDEEKGAVVPPVHD	1
O15320	cTAGE family member 5	CTAGE5	S	536	PSPLGWPSSETRAFLSPPTLLEGPLRLSPLL	0.999998
Q9Y5B0	RNA polymerase II subunit A C-terminal domain phosphatase	CTDP1	S	395	PARELNGSEAATPRDSPRPGKPDERDIWPPA	1
Q05D32	CTD small phosphatase-like protein 2	CTDSPL2	S	9	_______MRLRTRKASQQSNQIQTQRTARAK	0.999989
Q05D32	CTD small phosphatase-like protein 2	CTDSPL2	S	165	NFFSPANKNGTSGSDSPGQAVEAEEIVKQLD	0.986845
Q8WYA6	Beta-catenin-like protein 1	CTNNBL1	S	545	RHIIKEYAENIGDGRSPEFRENEQKRILGLL	1
P17812	CTP synthase 1	CTPS1	S	587	GSSSPDSEITELKFPSINHD___________	1
P17812	CTP synthase 1	CTPS1	S	575	RLSPRDTYSDRSGSSSPDSEITELKFPSINH	0.976151
P17812	CTP synthase 1	CTPS1	S	574	CRLSPRDTYSDRSGSSSPDSEITELKFPSIN	0.908224
P17812	CTP synthase 1	CTPS1	S	575	RLSPRDTYSDRSGSSSPDSEITELKFPSINH	0.976151
Q6PD62	RNA polymerase-associated protein CTR9 homolog	CTR9	S	970	RKKKKRRRHPKGEEGSDDDETENGPKPKKRR	1
Q6PD62	RNA polymerase-associated protein CTR9 homolog	CTR9	S	941	DDDLPISKKKKRRKGSGSEQEGEDEEGGERK	1
Q6PD62	RNA polymerase-associated protein CTR9 homolog	CTR9	T	925	RSKKGGEFDEFVNDDTDDDLPISKKKKRRKG	1
Q7Z7A3	Cytoplasmic tRNA 2-thiolation protein 1	CTU1	S	200	LRGDAGRLARGGGLGSPGEGGALPRCRPLQF	1
Q2VPK5	Cytoplasmic tRNA 2-thiolation protein 2	CTU2	S	419	TAFGAQTSSRLSQMQSPIPLTETRTPPGPCC	0.999975
Q9H467	CUE domain-containing protein 2	CUEDC2	S	110	NLQPQSSGVQGQVPISPEPLQRPEMLKEETR	0.999999
Q9HCG8	Pre-mRNA-splicing factor CWC22 homolog	CWC22	S	829	NKHGDPKKKRGERRNSFSENEKHTHRIKDSE	0.999935
Q9HCG8	Pre-mRNA-splicing factor CWC22 homolog	CWC22	S	91	RRERERDTDRKRSRKSPSPGRRNPETSVTQS	1
Q9HCG8	Pre-mRNA-splicing factor CWC22 homolog	CWC22	S	93	ERERDTDRKRSRKSPSPGRRNPETSVTQSSS	0.999916
Q9NXE8	Pre-mRNA-splicing factor CWC25 homolog	CWC25	S	218	DEHSAGRSQKKMANSSPVLSKVPGYGLQVRN	0.942688
Q8TB03	Uncharacterized protein CXorf38	CXorf38	T	314	LCLHQKLDSQEPGRQTPDRKA__________	0.999999
J3KNF8		CYB5B	S	13	___MSGSMATAEASGSDGKGQEVETSVTYYR	0.919194
Q53TN4	Cytochrome b reductase 1	CYBRD1	S	260	ARGSMPAYSGNNMDKSDSELNSEVAARKRNL	0.873542
Q53TN4	Cytochrome b reductase 1	CYBRD1	T	285	ARKRNLALDEAGQRSTM______________	0.943995
Q9Y271	Cysteinyl leukotriene receptor 1	CYSLTR1	S	326	KHSLSSVTYVPRKKASLPEKGEEICKV____	1
Q9UI36	Dachshund homolog 1	DACH1	T	580	DMGHESKRMHIEKDETPLSTPTARDSLDKLS	1
Q9UI36	Dachshund homolog 1	DACH1	T	584	ESKRMHIEKDETPLSTPTARDSLDKLSLTGH	0.997537
Q9UI36	Dachshund homolog 1	DACH1	T	580	DMGHESKRMHIEKDETPLSTPTARDSLDKLS	1
Q9UI36	Dachshund homolog 1	DACH1	T	584	ESKRMHIEKDETPLSTPTARDSLDKLSLTGH	0.997537
P51397	Death-associated protein 1	DAP	S	51	TKEEKDKDDQEWESPSPPKPTVFISGVIARG	0.986262
Q9UER7	Death domain-associated protein 6	DAXX	S	495	EDEEEEAAAGKDGDKSPMSSLQISNEKNLEP	0.999949
Q9UBU7	Protein DBF4 homolog A	DBF4	S	381	LKKTEQKEKVELQHISQKDCQEDDTTVKEQN	1
Q9UBU7	Protein DBF4 homolog A	DBF4	T	273	PSSMQKQTQVKLRIQTDGDKYGGTSIQLQLK	1
Q16643	Drebrin	DBN1	S	142	GAIGQRLSNGLARLSSPVLHRLRLREDENAE	0.999968
Q9UJU6	Drebrin-like protein	DBNL	S	275	IFKQKERAMSTTSISSPQPGKLRSPFLQKQL	0.901725
Q9UJU6	Drebrin-like protein	DBNL	S	283	MSTTSISSPQPGKLRSPFLQKQLTQPETHFG	1
P11182	Lipoamide acyltransferase component of branched-chain alpha-keto acid dehydrogenase complex, mitochondrial	DBT	S	220	ILNYLEKQTGAILPPSPKVEIMPPPPKPKDM	0.999999
Q5T6F0	DDB1- and CUL4-associated factor 12	DCAF12	S	15	_MARKVVSRKRKAPASPGAGSDAQGPQFGWD	0.999809
Q66K64	DDB1- and CUL4-associated factor 15	DCAF15	S	50	HVLKQLERVKISGQLSPRLFRKLPPRVCVSL	1
Q58WW2	DDB1- and CUL4-associated factor 6	DCAF6	S	336	PRARPESERERDGEQSPNVSLMQRMSDMLSR	1
Q9NPI6	mRNA-decapping enzyme 1A	DCP1A	T	401	GTSLPSVDLLQKLRLTPQHDQIQTQPLGKGA	1
Q8IZD4	mRNA-decapping enzyme 1B	DCP1B	S	147	QYEQLKAHQGTGAGISPVILNSGEGKEVDIL	1
Q9H773	dCTP pyrophosphatase 1	DCTPP1	S	2	______________MSVAGGEIRGDTGGEDT	1
Q9BTE7	DCN1-like protein 5;DCN1-like protein	DCUN1D5	S	9	_______MPVKKKRKSPGVAAAVAEDGGLKK	1
Q9BW61	DET1- and DDB1-associated protein 1	DDA1	S	95	EGESSAPPRKVARTDSPDMHEDT________	0.999999
Q92466	DNA damage-binding protein 2	DDB2	S	24	TQKTSEIVLRPRNKRSRSPLELEPEAKKLCA	1
Q92466	DNA damage-binding protein 2	DDB2	S	26	KTSEIVLRPRNKRSRSPLELEPEAKKLCAKG	1
Q92466	DNA damage-binding protein 2	DDB2	S	24	TQKTSEIVLRPRNKRSRSPLELEPEAKKLCA	1
Q92466	DNA damage-binding protein 2	DDB2	S	26	KTSEIVLRPRNKRSRSPLELEPEAKKLCAKG	1
P39656	Dolichyl-diphosphooligosaccharide--protein glycosyltransferase 48 kDa subunit	DDOST	S	143	VAASSDIGDPLRELGSECGIEFDEEKTAVID	1
Q92499	ATP-dependent RNA helicase DDX1	DDX1	S	481	TDDVHAKDNTRPGANSPEMWSEAIKILKGEY	1
H3BLZ8	Probable ATP-dependent RNA helicase DDX17	DDX17	S	64	PPPSVVTRPEPQALPSPAIRAPLPDLYPFGT	0.910669
Q9UHI6	Probable ATP-dependent RNA helicase DDX20	DDX20	S	678	TSSQSKGNKSYLEGSSDNQLKDSESTPVDDR	0.999937
Q9UHI6	Probable ATP-dependent RNA helicase DDX20	DDX20	S	714	PPNGSDTPNPEKYQESPGIQMKTRLKEGASQ	1
Q9UHI6	Probable ATP-dependent RNA helicase DDX20	DDX20	T	552	GCDRQSEEQMKNSVQTPVENSTNSQHQVKEA	0.998593
Q9UHI6	Probable ATP-dependent RNA helicase DDX20	DDX20	S	677	RTSSQSKGNKSYLEGSSDNQLKDSESTPVDD	0.999949
Q9UHI6	Probable ATP-dependent RNA helicase DDX20	DDX20	S	678	TSSQSKGNKSYLEGSSDNQLKDSESTPVDDR	0.999937
Q9NR30	Nucleolar RNA helicase 2	DDX21	S	71	KQVKKKAEPSEVDMNSPKSKKAKKKEEPSQN	1
Q9NR30	Nucleolar RNA helicase 2	DDX21	S	89	SKKAKKKEEPSQNDISPKTKSLRKKKEPIEK	1
Q9NR30	Nucleolar RNA helicase 2	DDX21	S	458	IFCETKKEAQELSQNSAIKQDAQSLHGDIPQ	0.897837
Q9NR30	Nucleolar RNA helicase 2	DDX21	S	13	___MPGKLRSDAGLESDTAMKKGETLRKQTE	0.996015
Q9NR30	Nucleolar RNA helicase 2	DDX21	S	121	VVSSKTKKVTKNEEPSEEEIDAPKPKKMKKE	1
Q9BUQ8	Probable ATP-dependent RNA helicase DDX23	DDX23	S	14	__MAGELADKKDRDASPSKEERKRSRTPDRE	0.998045
Q9BUQ8	Probable ATP-dependent RNA helicase DDX23	DDX23	S	16	MAGELADKKDRDASPSKEERKRSRTPDRERD	0.801336
Q9BUQ8	Probable ATP-dependent RNA helicase DDX23	DDX23	S	107	RDKDGHRRDKDRKRSSLSPGRGKDFKSRKDR	0.993774
Q9BUQ8	Probable ATP-dependent RNA helicase DDX23	DDX23	S	109	KDGHRRDKDRKRSSLSPGRGKDFKSRKDRDS	0.99999
Q9GZR7	ATP-dependent RNA helicase DDX24	DDX24	S	295	EAGAETRSPGKAEAESDALPDDTVIESEALP	0.9998
Q9GZR7	ATP-dependent RNA helicase DDX24	DDX24	S	82	SLFSKEAPKRKAQAVSEEEEEEEGKSSSPKK	1
Q9GZR7	ATP-dependent RNA helicase DDX24	DDX24	S	287	APPGETRTEAGAETRSPGKAEAESDALPDDT	0.900843
B7Z6D5	Probable ATP-dependent RNA helicase DDX27	DDX27	S	23	IGTIGEDDEVPVEPESDSGDEEEEGPIVLGR	0.99931
B7Z6D5	Probable ATP-dependent RNA helicase DDX27	DDX27	S	25	TIGEDDEVPVEPESDSGDEEEEGPIVLGRRQ	0.999871
Q9UJV9	Probable ATP-dependent RNA helicase DDX41	DDX41	S	4	____________MEESEPERKRARTDEVPAG	1
Q9UJV9	Probable ATP-dependent RNA helicase DDX41	DDX41	S	21	PERKRARTDEVPAGGSRSEAEDEDDEDYVPY	0.998027
Q9UJV9	Probable ATP-dependent RNA helicase DDX41	DDX41	S	23	RKRARTDEVPAGGSRSEAEDEDDEDYVPYVP	0.997896
Q86XP3	ATP-dependent RNA helicase DDX42	DDX42	S	751	SLNSVPTNSAQQGHNSPDSPVTSAAKGIPGF	0.989106
Q86XP3	ATP-dependent RNA helicase DDX42	DDX42	S	754	SVPTNSAQQGHNSPDSPVTSAAKGIPGFGNT	0.972715
A0A0C4DG89	Probable ATP-dependent RNA helicase DDX46	DDX46	S	804	NERKKLQKAALGLQDSDDEDAAVDIDEQIES	1
Q9H0S4	Probable ATP-dependent RNA helicase DDX47	DDX47	S	9	_______MAAPEEHDSPTEASQPIVEEEETK	0.999963
Q9BQ39	ATP-dependent RNA helicase DDX50	DDX50	S	82	KEKLNGDTEEGFNRLSDEFSKSHKSRRKDLP	0.976894
Q9BQ39	ATP-dependent RNA helicase DDX50	DDX50	S	45	SDRRKSRHHYDSDEKSETRENGVTDDLDAPK	0.974601
Q9NR30	ATP-dependent RNA helicase DDX50;Nucleolar RNA helicase 2	DDX50;DDX21	T	315	GQFERMRNGIDILVGTPGRIKDHIQNGKLDL;SQINHIRNGIDILVGTPGRIKDHLQSGRLDL	1
Q8N8A6	ATP-dependent RNA helicase DDX51	DDX51	S	83	RRPRRRRRVNDAEPGSPEAPQGKRRKADGED	1
Q8TDD1-2	ATP-dependent RNA helicase DDX54	DDX54	S	788	QKQKIDDRDSDEEGASDRRGPERRGGKRDRG	0.948562
Q8NHQ9	ATP-dependent RNA helicase DDX55	DDX55	S	544	EKKKKMNEKRKREEGSDIEDEDMEELLNDTR	1
O75398	Deformed epidermal autoregulatory factor 1 homolog	DEAF1	T	312	FVPYKRRKKENELPTTPVKKDSPKNITLLPA	0.812643
O75398	Deformed epidermal autoregulatory factor 1 homolog	DEAF1	T	432	KIVLTSLPALAVPPPTPTKAAPPALVNGLEL	0.756033
Q9NUI1	Peroxisomal 2,4-dienoyl-CoA reductase	DECR2	S	287	WLTFPNGVKGLPDFASFSAKL__________	0.818293
Q9H4E7	Differentially expressed in FDCP 6 homolog	DEF6	T	619	QKSLNGGDEAPAPASTPQEDKLDPAPEN___	0.776526
P35659	Protein DEK	DEK	S	306	KKNQNSSKKESESEDSSDDEPLIKKLKKPPT	1
P35659	Protein DEK	DEK	S	307	KNQNSSKKESESEDSSDDEPLIKKLKKPPTD	1
P35659	Protein DEK	DEK	S	51	EDEDDEEEEEEEKEKSLIVEGKREKKKVERL	1
P35659	Protein DEK	DEK	T	13	___MSASAPAAEGEGTPTQPASEKEPEMPGP	0.986719
P35659	Protein DEK	DEK	S	303	STTKKNQNSSKKESESEDSSDDEPLIKKLKK	1
P35659	Protein DEK	DEK	S	306	KKNQNSSKKESESEDSSDDEPLIKKLKKPPT	1
P35659	Protein DEK	DEK	S	307	KNQNSSKKESESEDSSDDEPLIKKLKKPPTD	1
P35659	Protein DEK	DEK	S	243	DESSSDEDEKKNKEESSDDEDKESEEEPPKK	1
P35659	Protein DEK	DEK	S	251	EKKNKEESSDDEDKESEEEPPKKTAKREKPK	1
Q8TEH3	DENN domain-containing protein 1A	DENND1A	S	986	RDPFEDLLQKTKQDVSPSPALAPAPDSVEQL	0.998864
Q8TEH3	DENN domain-containing protein 1A	DENND1A	S	592	NLDMEAALQPLGQAKSLEDLRAPKDLREQPG	1
Q8TEH3	DENN domain-containing protein 1A	DENND1A	T	707	PTLGSITIPRPQGRKTPELGIVPPPPIPRPA	1
Q6P3S1-5	DENN domain-containing protein 1B	DENND1B	S	653	LHGKHLPPSPRKRVSSSGLTDSLFILKEENS	0.817167
H0YAW2		DENND3	S	40	VVSRFPYYNSLKDCLSWPRRKQLTTVPFCVI	0.999655
Q7Z401	C-myc promoter-binding protein	DENND4A	S	1240	SIDLQRACDDKLNKKSPPLVKACRRSSLPPN	1
Q7Z401	C-myc promoter-binding protein	DENND4A	S	1015	ETRNIQSRCFRKRHKSDNETNLQQQVVWGNR	1
O75064	DENN domain-containing protein 4B	DENND4B	S	1092	PPPELPPDLPPPARRSPMDSLLHPRERPGST	1
O43583	Density-regulated protein	DENR	S	73	EKNFPNEFAKLTVENSPKQEAGISEGQGTAG	1
O00273	DNA fragmentation factor subunit alpha	DFFA	S	315	TQSLHSLRSISASKASPPGDLQNPKRARQDP	1
Q96DF8	Protein DGCR14	DGCR14	T	3	_____________METPGASASSLLLPAASR	0.999997
Q13574	Diacylglycerol kinase zeta	DGKZ	S	205	RRPSGQHPGPGGRRASGTTAGTMLPTRVRPL	0.96633
Q13574	Diacylglycerol kinase zeta	DGKZ	S	193	WGLHGYYRRLSQRRPSGQHPGPGGRRASGTT	1
Q13574	Diacylglycerol kinase zeta	DGKZ	S	24	FRGKVPGPGEGQQRPSSVGLPTGKARRRSPA	0.816813
Q9UBM7	7-dehydrocholesterol reductase	DHCR7	S	14	__MAAKSQPNIPKAKSLDGVTNDRTASQGQW	1
Q7Z478	ATP-dependent RNA helicase DHX29	DHX29	S	200	KSRPKFQSPQIQATISPPLQPKTKTYEEDPK	0.998398
Q9H2U1	ATP-dependent RNA helicase DHX36	DHX36	S	825	FVSSRNPKDPESNINSDNEKIIKAVICAGLY	0.980603
Q6P158	Putative ATP-dependent RNA helicase DHX57	DHX57	S	127	KALLRDLQEQDADAGSERGLSGEEEDDEPDC	1
Q14562	ATP-dependent RNA helicase DHX8	DHX8	S	460	EPPFLRGHTKQSMDMSPIKIVKNPDGSLSQA	1
Q08211	ATP-dependent RNA helicase A	DHX9	S	87	INEIKSEEVPAFGVASPPPLTDTPDTTANAE	0.918139
O60610-2	Protein diaphanous homolog 1	DIAPH1	S	22	SLGPGRGTRDKKKGRSPDELPSAGGDGGKSK	0.999999
O60610-2	Protein diaphanous homolog 1	DIAPH1	S	1230	KDDAMAAVPAKVSKNSETFPTILEEAKELVG	0.999948
Q9NSV4	Protein diaphanous homolog 3	DIAPH3	S	1093	RRKRTPMPKDVRQSLSPMSQRPVLKVCNHEN	0.990554
Q9UPY3	Endoribonuclease Dicer	DICER1	S	1016	TPRHLNQKGKALPLSSAEKRKAKWESLQNKQ	0.854472
Q9BTC0	Death-inducer obliterator 1	DIDO1	S	1040	LSVPPSPNISTSESRSPPEGDTTLFLSRLST	1
Q9P265	Disco-interacting protein 2 homolog A;Disco-interacting protein 2 homolog B	DIP2A;DIP2B	T	283	PVNSRVSSKIQQLLNTLKRPKRPPLKEFFVD;PVSSRVSTKIQQLLNTLKRPKRPPLKEFFVD	1
O60832	H/ACA ribonucleoprotein complex subunit 4	DKC1	S	485	KKKSKKDKKAKAGLESGAEPGDGDSDTTKKK	1
O60832	H/ACA ribonucleoprotein complex subunit 4	DKC1	S	494	AKAGLESGAEPGDGDSDTTKKKKKKKKAKEV	0.952063
O60832	H/ACA ribonucleoprotein complex subunit 4	DKC1	S	513	KKKKKKKKAKEVELVSE______________	1
O60832	H/ACA ribonucleoprotein complex subunit 4	DKC1	S	451	QVVAEAAKTAKRKRESESESDETPPAAPQLI	1
O60832	H/ACA ribonucleoprotein complex subunit 4	DKC1	S	453	VAEAAKTAKRKRESESESDETPPAAPQLIKK	1
O60832	H/ACA ribonucleoprotein complex subunit 4	DKC1	S	485	KKKSKKDKKAKAGLESGAEPGDGDSDTTKKK	1
O60832	H/ACA ribonucleoprotein complex subunit 4	DKC1	S	494	AKAGLESGAEPGDGDSDTTKKKKKKKKAKEV	0.952063
O60832	H/ACA ribonucleoprotein complex subunit 4	DKC1	S	451	QVVAEAAKTAKRKRESESESDETPPAAPQLI	1
O60832	H/ACA ribonucleoprotein complex subunit 4	DKC1	S	453	VAEAAKTAKRKRESESESDETPPAAPQLIKK	1
O60832	H/ACA ribonucleoprotein complex subunit 4	DKC1	T	458	KTAKRKRESESESDETPPAAPQLIKKEKKKS	1
O60832	H/ACA ribonucleoprotein complex subunit 4	DKC1	S	451	QVVAEAAKTAKRKRESESESDETPPAAPQLI	1
O60832	H/ACA ribonucleoprotein complex subunit 4	DKC1	S	453	VAEAAKTAKRKRESESESDETPPAAPQLIKK	1
O60832	H/ACA ribonucleoprotein complex subunit 4	DKC1	S	455	EAAKTAKRKRESESESDETPPAAPQLIKKEK	1
O60832	H/ACA ribonucleoprotein complex subunit 4	DKC1	T	458	KTAKRKRESESESDETPPAAPQLIKKEKKKS	1
Q9Y2H0-3	Disks large-associated protein 4	DLGAP4	T	376	DELYHLKANSWQLVETPEKRKEEKKPPPPVP	1
Q15398	Disks large-associated protein 5	DLGAP5	S	618	EVDKIVFDAGFFRVESPVKLFSGLSVSSEGP	1
Q15398	Disks large-associated protein 5	DLGAP5	S	777	DVLMSSPEKNTASQNSILEEGETKISQSELF	0.999579
Q9NPF5	DNA methyltransferase 1-associated protein 1	DMAP1	T	445	PDPKDTIIDVVGAPLTPNSRKRRESASSSSS	0.9406
P11532	Dystrophin	DMD	T	2551	NLKNKTSNQEARTIITDRIERIQNQWDEVQE	0.999994
F5H269	DmX-like protein 1	DMXL1	S	924	WQPEEHYSSSPEKILSPFSQKYQACRANLQS	0.999978
Q8TDJ6	DmX-like protein 2	DMXL2	S	929	LKSVQACLAKASEGASSESLLSVPGQKNVDS	0.99308
Q8TDJ6	DmX-like protein 2	DMXL2	S	1857	NYLRTHPLLIRRNLASPEGTLATLGLKTEKN	0.999997
Q9P2D7	Dynein heavy chain 1, axonemal	DNAH1	S	1972	ENMNTVLDDNKKLCLSSGEIIKLTEAMTMMF	1
Q9P2D7	Dynein heavy chain 1, axonemal	DNAH1	S	1973	NMNTVLDDNKKLCLSSGEIIKLTEAMTMMFE	1
Q8WXX0	Dynein heavy chain 7, axonemal	DNAH7	S	76	FHLSVKQDDESPEPFSVKNEQSHAEYMERFG	0.828911
Q96JB1	Dynein heavy chain 8, axonemal	DNAH8	Y	1105	EYKKKMSYMIAFINEYLKKLSRPIRDLDDVR	0.999505
P31689	DnaJ homolog subfamily A member 1	DNAJA1	S	335	LIIEFKVNFPENGFLSPDKLSLLEKLLPERK	1
O60884	DnaJ homolog subfamily A member 2	DNAJA2	S	123	NGRRRGEDMMHPLKVSLEDLYNGKTTKLQLS	0.99999
P25686	DnaJ homolog subfamily B member 2	DNAJB2	S	313	GTQEGARGEATKRSPSPEEKASRCLIL____	0.987438
Q99543	DnaJ homolog subfamily C member 2;DnaJ homolog subfamily C member 2, N-terminally processed	DNAJC2	S	47	GRWFEAFVKRRNRNASASFQELEDKKELSEE	1
Q99543	DnaJ homolog subfamily C member 2;DnaJ homolog subfamily C member 2, N-terminally processed	DNAJC2	S	49	WFEAFVKRRNRNASASFQELEDKKELSEESE	1
Q99543	DnaJ homolog subfamily C member 2;DnaJ homolog subfamily C member 2, N-terminally processed	DNAJC2	S	60	NASASFQELEDKKELSEESEDEELQLEEFPM	1
Q99543	DnaJ homolog subfamily C member 2;DnaJ homolog subfamily C member 2, N-terminally processed	DNAJC2	S	63	ASFQELEDKKELSEESEDEELQLEEFPMLKT	1
Q99543	DnaJ homolog subfamily C member 2;DnaJ homolog subfamily C member 2, N-terminally processed	DNAJC2	S	47	GRWFEAFVKRRNRNASASFQELEDKKELSEE	1
Q99543	DnaJ homolog subfamily C member 2;DnaJ homolog subfamily C member 2, N-terminally processed	DNAJC2	S	49	WFEAFVKRRNRNASASFQELEDKKELSEESE	1
Q5F1R6	DnaJ homolog subfamily C member 21	DNAJC21	S	423	EGVKVDPEDTNLNQDSAKELEDSPQENVSVT	1
Q9H3Z4-2	DnaJ homolog subfamily C member 5	DNAJC5	S	10	______MADQRQRSLSTSGESLYHVLGLDKN	0.753858
A0A0D9SFE4		DNM1	S	847	PNRAPPGVPSRKGPASPTRPAAPRPAEAPLL	0.966985
A0A0D9SFE4		DNM1	T	849	RAPPGVPSRKGPASPTRPAAPRPAEAPLLDL	0.893006
A0A0D9SFE4	Dynamin-1	DNM1	S	770	DDSWLQVQSVPAGRRSPTSSPTPQRRAPAVP	0.991742
A0A0D9SFE4	Dynamin-1	DNM1	T	772	SWLQVQSVPAGRRSPTSSPTPQRRAPAVPPA	0.808204
O00429	Dynamin-1-like protein	DNM1L	S	616	LLAEEKSKPIPIMPASPQKGHAVNLLDVPVP	1
P26358-2	DNA (cytosine-5)-methyltransferase 1	DNMT1	S	730	ADDDEEVDDNIPEMPSPKKMHQGKKKKQNKN	1
P26358	DNA (cytosine-5)-methyltransferase 1	DNMT1	S	143	PPKPLSKPRTPRRSKSDGEAKPEPSPSPRIT	1
P26358-2	DNA (cytosine-5)-methyltransferase 1	DNMT1	S	328	RRPEEKEPEKVNPQISDEKDEDEKEEKRRKT	1
Q9Y6K1	DNA (cytosine-5)-methyltransferase 3A	DNMT3A	S	105	NGDLEKRSEPQPEEGSPAGGQKGGAPAEGEG	1
Q9Y6K1	DNA (cytosine-5)-methyltransferase 3A	DNMT3A	S	255	EEASPPAVQQPTDPASPTVATTPEPVGSDAG	0.814466
B9ZVU2		DNPEP	S	2	______________MSGHSPTRGAMQVAMNG	0.813185
B9ZVU2		DNPEP	S	5	___________MSGHSPTRGAMQVAMNGKAR	0.996268
O43598	2'-deoxynucleoside 5'-phosphate N-hydrolase 1	DNPH1	S	169	LDRYFEADPPGQVAASPDPTT__________	0.987953
Q5QJE6	Deoxynucleotidyltransferase terminal-interacting protein 2	DNTTIP2	S	512	MSADKNFYLEEEDKASEVAIEEEKEEEEDEK	1
Q5QJE6	Deoxynucleotidyltransferase terminal-interacting protein 2	DNTTIP2	S	434	DFECDTKLYTSAPNTSQGKDNSVLLVLSSDE	0.767591
Q5QJE6	Deoxynucleotidyltransferase terminal-interacting protein 2	DNTTIP2	T	610	IKEKKKNELLQKAVITPDFEKNHCVPPYSES	1
Q92608	Dedicator of cytokinesis protein 2	DOCK2	S	1705	LPEVKLRRSKKRTKRSSVVFADEKAAAESDL	0.78517
Q92608	Dedicator of cytokinesis protein 2	DOCK2	S	1706	PEVKLRRSKKRTKRSSVVFADEKAAAESDLK	0.960688
Q92608	Dedicator of cytokinesis protein 2	DOCK2	S	1685	LASPKTPRVEQEEPISPGSTLPEVKLRRSKK	0.999986
Q92608	Dedicator of cytokinesis protein 2	DOCK2	S	1685	LASPKTPRVEQEEPISPGSTLPEVKLRRSKK	0.999986
Q92608	Dedicator of cytokinesis protein 2	DOCK2	T	1675	KPTSESFDLELASPKTPRVEQEEPISPGSTL	1
Q9H7D0	Dedicator of cytokinesis protein 5	DOCK5	S	1756	KSQVIAEKAPEPDLMSPTRKAQRPKSLQLMD	0.981324
Q96HP0	Dedicator of cytokinesis protein 6	DOCK6	S	1308	AAFEYKGKKAFERINSLTFKKSLDMKARLEE	0.9972
Q96N67	Dedicator of cytokinesis protein 7	DOCK7	S	439	ISTGERKGSWSERRNSSIVGRRSLERTTSGD	0.964949
Q96N67	Dedicator of cytokinesis protein 7	DOCK7	S	1432	QLGTYTIASPPERSPSGSAFGSQENLRWRKD	0.998602
Q96N67	Dedicator of cytokinesis protein 7	DOCK7	S	1383	SCFEYKGKKVFERMNSLTFKKSKDMRAKLEE	0.999014
Q96N67	Dedicator of cytokinesis protein 7	DOCK7	T	371	GECAEPYMIFKEADATKNKEKLEKLKSQADQ	1
Q8NF50	Dedicator of cytokinesis protein 8	DOCK8	S	451	RRTLAQSRRLSERALSLEENGVGSNFKTSTL	1
Q99704	Docking protein 1	DOK1	S	269	AQGKAGQGHDVLRADSHEGEVAEGKLPSPPG	1
D6RAM3	Docking protein 3	DOK3	S	274	PELTRPQPCPLPRATSLPSLDTPGELREMPP	0.998259
Q9Y3R5	Protein dopey-2	DOPEY2	S	1183	ESFKAGAKLSLVRVDSDKTQASESFSSDEEA	1
Q8TEK3	Histone-lysine N-methyltransferase, H3 lysine-79 specific	DOT1L	S	1035	LPEASKGDLPSDSGFSDPESEAKRRIVFTIT	0.977896
Q8TEK3	Histone-lysine N-methyltransferase, H3 lysine-79 specific	DOT1L	S	834	VPGSMKLSPQDPRPLSPGALQLAGEKSSEKG	1
Q8TEK3	Histone-lysine N-methyltransferase, H3 lysine-79 specific	DOT1L	S	1104	RKRASAGTPSLSAGVSPKRRALPSVAGLFTQ	1
Q8TEK3	Histone-lysine N-methyltransferase, H3 lysine-79 specific	DOT1L	S	374	GPEGKVAGPADAPMDSGAEEEKAGAATVKKP	1
Q8TEK3	Histone-lysine N-methyltransferase, H3 lysine-79 specific	DOT1L	S	826	GLPYQSPSVPGSMKLSPQDPRPLSPGALQLA	1
Q8TEK3	Histone-lysine N-methyltransferase, H3 lysine-79 specific	DOT1L	S	834	VPGSMKLSPQDPRPLSPGALQLAGEKSSEKG	1
Q92785	Zinc finger protein ubi-d4	DPF2	S	244	AHSHLAEEEGEDKEDSQPPTPVSQRSEEQKS	0.997962
Q92785	Zinc finger protein ubi-d4	DPF2	T	248	LAEEEGEDKEDSQPPTPVSQRSEEQKSKKGP	0.999775
O60762	Dolichol-phosphate mannosyltransferase subunit 1	DPM1	S	9	_______MASLEVSRSPRRSRRELEVRSPRQ	0.999587
Q86TI2	Dipeptidyl peptidase 9	DPP9	T	6	__________MATTGTPTADRGDAAATDDPA	0.992101
Q6ZN68	Putative C-mannosyltransferase DPY19L2P2	DPY19L2P2	T	15	_MADSRRVIIASWYRTFMGIVNLFGLETKTC	0.999927
Q12882	Dihydropyrimidine dehydrogenase [NADP(+)]	DPYD	S	905	IAENKIRLKEQNVAFSPLKRNCFIPKRPIPT	1
Q14117	Dihydropyrimidinase	DPYS	S	357	FTKIPNGVNGVEDRMSVIWEKGVHSGKMDEN	1
Q01658	Protein Dr1	DR1	S	105	VLQECKTVALKRRKASSRLENLGIPEEELLR	0.867148
Q08554	Desmocollin-1	DSC1	S	112	SDGQRREQQEIKVVLSARENKSPKKRHTKDT	0.998703
Q8TEA8	D-tyrosyl-tRNA(Tyr) deacylase 1	DTD1	S	197	SKERNTPRKEDRSASSGAEGDVSSEREP___	0.999927
Q8TEA8	D-tyrosyl-tRNA(Tyr) deacylase 1	DTD1	S	196	SSKERNTPRKEDRSASSGAEGDVSSEREP__	0.993386
Q8TEA8	D-tyrosyl-tRNA(Tyr) deacylase 1	DTD1	S	197	SKERNTPRKEDRSASSGAEGDVSSEREP___	0.999927
Q8TEA8	D-tyrosyl-tRNA(Tyr) deacylase 1	DTD1	S	205	KEDRSASSGAEGDVSSEREP___________	0.831762
Q96EV8	Dysbindin	DTNBP1	S	321	ATRDISEGGESPVVQSDEEEVQVDTALATSH	0.998801
Q8TDB6	E3 ubiquitin-protein ligase DTX3L	DTX3L	S	539	HETPMDIDSDDSKAASPPLKGSVSSEASELD	1
Q8TDB6	E3 ubiquitin-protein ligase DTX3L	DTX3L	S	9	_______MASHLRPPSPLLVRVYKSGPRVRR	1
Q8TDB6	E3 ubiquitin-protein ligase DTX3L	DTX3L	S	532	GKKLKEGHETPMDIDSDDSKAASPPLKGSVS	0.999993
P33316	Deoxyuridine 5'-triphosphate nucleotidohydrolase, mitochondrial	DUT	S	88	VGAAGWKGELPKAGGSPAPGPETPAISPSKR	1
P33316	Deoxyuridine 5'-triphosphate nucleotidohydrolase, mitochondrial	DUT	S	99	KAGGSPAPGPETPAISPSKRARPAEVGGMQL	0.980706
P33316-2	Deoxyuridine 5'-triphosphate nucleotidohydrolase, mitochondrial	DUT	S	11	_____MPCSEETPAISPSKRARPAEVGGMQL	0.999378
Q14204	Cytoplasmic dynein 1 heavy chain 1	DYNC1H1	S	4368	DDLAYAETEKKTRTDSTSDGRPAWMRTLHTT	0.972489
Q13409-3	Cytoplasmic dynein 1 intermediate chain 2	DYNC1I2	S	81	SMGLTPESPIVPPPMSPSSKSVSTPSEAGSQ	0.99256
Q13409-3	Cytoplasmic dynein 1 intermediate chain 2	DYNC1I2	S	73	REAEALLQSMGLTPESPIVPPPMSPSSKSVS	0.901022
Q13409-3	Cytoplasmic dynein 1 intermediate chain 2	DYNC1I2	S	81	SMGLTPESPIVPPPMSPSSKSVSTPSEAGSQ	0.99256
Q9Y6G9	Cytoplasmic dynein 1 light intermediate chain 1	DYNC1LI1	S	207	RDFQEYVEPGEDFPASPQRRNTASQEDKDDS	1
O43237	Cytoplasmic dynein 1 light intermediate chain 2	DYNC1LI2	S	446	SFFNSLLSKKTGSPGSPGAGGVQSTAKKSGQ	0.998949
P63167	Dynein light chain 1, cytoplasmic	DYNLL1	S	21	AVIKNADMSEEMQQDSVECATQALEKYNIEK	0.99016
Q13627	Dual specificity tyrosine-phosphorylation-regulated kinase 1A;Dual specificity tyrosine-phosphorylation-regulated kinase 1B	DYRK1A;DYRK1B	Y	321	VDFGSSCQLGQRIYQYIQSRFYRSPEVLLGM	0.999527
Q92630	Dual specificity tyrosine-phosphorylation-regulated kinase 2;Dual specificity tyrosine-phosphorylation-regulated kinase 4	DYRK2;DYRK4	Y	382	IDFGSSCYEHQRVYTYIQSRFYRAPEVILGA	0.756387
Q8WXU2	Dyslexia susceptibility 1 candidate gene 1 protein	DYX1C1	Y	165	NERIKATKALEAWKEYQRKAEEQKKIQREEK	1
Q16254	Transcription factor E2F4	E2F4	T	14	__MAEAGPQAPPPPGTPSRHEKSLGLLTTKF	0.899777
A0AVK6	Transcription factor E2F8	E2F8	S	417	KSIESDRRKINSAPSSPIKTNKAESSQNSAP	0.989951
A0AVK6	Transcription factor E2F8	E2F8	S	413	IKLVKSIESDRRKINSAPSSPIKTNKAESSQ	0.999984
A0AVK6	Transcription factor E2F8	E2F8	S	417	KSIESDRRKINSAPSSPIKTNKAESSQNSAP	0.989951
Q96JC9	ELL-associated factor 1	EAF1	S	165	KPPVGPKTSPLKDNPSPEPQLDDIKRELRAE	1
Q96CJ1	ELL-associated factor 2	EAF2	S	154	NLVKHSPSEDKMSPASPIDDIERELKAEASL	1
O00559	Receptor-binding cancer antigen expressed on SiSo cells	EBAG9	S	36	FLKRLICRSGRGRKLSGDQITLPTTVDYSSV	0.758148
Q9H8V3-3	Protein ECT2	ECT2	T	359	DARAGETMYLYEKANTPELKKSVSMLSLNTP	1
Q6P2E9	Enhancer of mRNA-decapping protein 4	EDC4	S	918	RLPAKDWKTKGSPRTSPKLKRKSKKDDGDAA	0.917115
Q6P2E9	Enhancer of mRNA-decapping protein 4	EDC4	T	977	AELRHSQEELLQRLCTQLEGLQSTVTGHVER	0.997686
Q6P2E9	Enhancer of mRNA-decapping protein 4	EDC4	T	64	VPDPLCSGDSTSANKTGLRTMPPINLQEKQV	1
Q6P2E9	Enhancer of mRNA-decapping protein 4	EDC4	T	68	LCSGDSTSANKTGLRTMPPINLQEKQVICLS	1
P68104	Elongation factor 1-alpha 1;Putative elongation factor 1-alpha-like 3;Elongation factor 1-alpha;Elongation factor 1-alpha 2	EEF1A1;EEF1A1P5;EEF1A2	S	107	APGHRDFIKNMITGTSQADCAVLIVAAGVGE	0.952544
P24534	Elongation factor 1-beta	EEF1B2	S	95	GPADVEDTTGSGATDSKDDDDIDLFGSDDEE	0.994893
P24534	Elongation factor 1-beta	EEF1B2	S	128	EEAKRLREERLAQYESKKAKKPALVAKSSIL	1
P24534	Elongation factor 1-beta	EEF1B2	Y	126	ESEEAKRLREERLAQYESKKAKKPALVAKSS	1
P29692	Elongation factor 1-delta	EEF1D	S	133	SSPGHRATAPQTQHVSPMRQVEPPAKKPATP	0.999998
P29692	Elongation factor 1-delta	EEF1D	S	162	TPAEDDEDDDIDLFGSDNEEEDKEAAQLREE	1
P13639	Elongation factor 2	EEF2	T	57	KAGIIASARAGETRFTDTRKDEQERCITIKS	0.964386
P13639	Elongation factor 2	EEF2	T	435	LVSTGLKVRIMGPNYTPGKKEDLYLKPIQRT	1
P13639	Elongation factor 2	EEF2	Y	457	LYLKPIQRTILMMGRYVEPIEDVPCGNIVGL	1
O00418	Eukaryotic elongation factor 2 kinase	EEF2K	S	18	DEDLIFRLEGVDGGQSPRAGHDGDSDGDSDD	1
P57772	Selenocysteine-specific elongation factor	EEFSEC	S	537	FGQSGKFKIHIPGGLSPESKKILTPALKKRA	0.920302
Q7L9B9	Endonuclease/exonuclease/phosphatase family domain-containing protein 1	EEPD1	S	554	YTEKDWSKKDAPRNGSGVALERSEANIKHER	0.999353
Q96C19	EF-hand domain-containing protein D2	EFHD2	S	74	LLRRADLNQGIGEPQSPSRRVFNPYTEFKEF	0.999634
Q8NDI1	EH domain-binding protein 1	EHBP1	S	1058	GNEEKAAITETQRKPSEDEVLNKGFKDTSQY	0.999969
Q8NDI1	EH domain-binding protein 1	EHBP1	S	408	TERRVKRKAPAPPVLSPKTGVLNENTVSAGK	1
Q8NDI1	EH domain-binding protein 1	EHBP1	S	1035	FSQYIENRPEMKRQRSIQEDTKKGNEEKAAI	0.999994
Q8N3D4	EH domain-binding protein 1-like protein 1	EHBP1L1	S	310	AQDTAPTPAPRLRKGSDALRPPVPQGEDEVP	1
Q8N3D4	EH domain-binding protein 1-like protein 1	EHBP1L1	S	964	SGAWGAQEAEMKVLESPENKSGTFKAQEAEA	1
O14681	Etoposide-induced protein 2.4 homolog	EI24	S	326	LQSALSSSTSAEKFPSPHPSPAKLKATAGH_	1
O14681	Etoposide-induced protein 2.4 homolog	EI24	S	330	LSSSTSAEKFPSPHPSPAKLKATAGH_____	1
O14681	Etoposide-induced protein 2.4 homolog	EI24	S	326	LQSALSSSTSAEKFPSPHPSPAKLKATAGH_	1
O14681	Etoposide-induced protein 2.4 homolog	EI24	S	330	LSSSTSAEKFPSPHPSPAKLKATAGH_____	1
Q9BY44	Eukaryotic translation initiation factor 2A;Eukaryotic translation initiation factor 2A, N-terminally processed	EIF2A	S	506	HEAKKAAKQEARSDKSPDLAPTPAPQSTPRN	1
Q9P2K8	Eukaryotic translation initiation factor 2-alpha kinase 4	EIF2AK4	T	667	YNAWIERHERPAGPGTPPPDSGPLAKDDRAA	1
H0YGG4		EIF2B1	S	7	_________XRGRLGSPGAPQQEDAMDDKEL	1
Q9UI10	Translation initiation factor eIF-2B subunit delta	EIF2B4	S	12	____MAAVAVAVREDSGSGMKAELPPGPGAV	0.955269
Q9UI10	Translation initiation factor eIF-2B subunit delta	EIF2B4	S	130	KQARKGEQGGPPPKASPSTAGETPSGVKRLP	0.993719
Q9UI10	Translation initiation factor eIF-2B subunit delta	EIF2B4	T	137	QGGPPPKASPSTAGETPSGVKRLPEYPQVDD	0.875663
Q13144	Translation initiation factor eIF-2B subunit epsilon	EIF2B5	S	544	SEQSMDSEEPDSRGGSPQMDDIKVFQNEVLG	1
P20042	Eukaryotic translation initiation factor 2 subunit 2	EIF2S2	S	105	DIDEAEEGVKDLKIESDVQEPTEPEDDLDIM	1
P20042	Eukaryotic translation initiation factor 2 subunit 2	EIF2S2	S	2	______________MSGDEMIFDPTMSKKKK	1
P20042	Eukaryotic translation initiation factor 2 subunit 2	EIF2S2	T	111	EGVKDLKIESDVQEPTEPEDDLDIMLGNKKK	1
Q99613	Eukaryotic translation initiation factor 3 subunit C;Eukaryotic translation initiation factor 3 subunit C-like protein	EIF3C;EIF3CL	S	166	DFESHITSYKQNPEQSADEDAEKNEEDSEGS	1
Q99613	Eukaryotic translation initiation factor 3 subunit C;Eukaryotic translation initiation factor 3 subunit C-like protein	EIF3C;EIF3CL	S	39	TKPVGGNYGKQPLLLSEDEEDTKRVVRSAKD	1
O75821	Eukaryotic translation initiation factor 3 subunit G	EIF3G	S	42	TSELLKGIPLATGDTSPEPELLPGAPLPPPK	0.996251
O15372	Eukaryotic translation initiation factor 3 subunit H	EIF3H	S	183	RLTPKLMEVCKEKDFSPEALKKANITFEYMF	1
O75822	Eukaryotic translation initiation factor 3 subunit J	EIF3J	S	11	_____MAAAAAAAGDSDSWDADAFSVEDPVR	0.999981
O75822	Eukaryotic translation initiation factor 3 subunit J	EIF3J	S	127	EQLADKLRLKKLQEESDLELAKETFGVNNAV	1
O75822	Eukaryotic translation initiation factor 3 subunit J	EIF3J	T	109	EIKKRLEEPEEPKVLTPEEQLADKLRLKKLQ	1
O75822	Eukaryotic translation initiation factor 3 subunit J	EIF3J	S	11	_____MAAAAAAAGDSDSWDADAFSVEDPVR	0.999981
O75822	Eukaryotic translation initiation factor 3 subunit J	EIF3J	S	13	___MAAAAAAAGDSDSWDADAFSVEDPVRKV	0.999942
Q9UBQ5	Eukaryotic translation initiation factor 3 subunit K	EIF3K	S	217	VEKIDFDSVSSIMASSQ______________	0.990611
P38919	Eukaryotic initiation factor 4A-III;Eukaryotic initiation factor 4A-III, N-terminally processed	EIF4A3	S	10	______MATTATMATSGSARKRLLKEEDMTK	0.894136
P38919	Eukaryotic initiation factor 4A-III;Eukaryotic initiation factor 4A-III, N-terminally processed	EIF4A3	S	12	____MATTATMATSGSARKRLLKEEDMTKVE	0.982181
P38919	Eukaryotic initiation factor 4A-III;Eukaryotic initiation factor 4A-III, N-terminally processed	EIF4A3	T	163	EDIRKLDYGQHVVAGTPGRVFDMIRRRSLRT	1
P23588	Eukaryotic translation initiation factor 4B	EIF4B	S	498	AWVKRSSNPPARSQSSDTEQQSPTSGGGKVA	0.985762
P23588	Eukaryotic translation initiation factor 4B	EIF4B	S	445	STTSSRNARRRESEKSLENETLNKEEDCHSP	1
P23588	Eukaryotic translation initiation factor 4B	EIF4B	S	498	AWVKRSSNPPARSQSSDTEQQSPTSGGGKVA	0.985762
P23588	Eukaryotic translation initiation factor 4B	EIF4B	S	504	SNPPARSQSSDTEQQSPTSGGGKVAPAQPSE	0.998695
P23588	Eukaryotic translation initiation factor 4B	EIF4B	S	497	NAWVKRSSNPPARSQSSDTEQQSPTSGGGKV	0.947732
P23588	Eukaryotic translation initiation factor 4B	EIF4B	S	498	AWVKRSSNPPARSQSSDTEQQSPTSGGGKVA	0.985762
P23588	Eukaryotic translation initiation factor 4B	EIF4B	S	504	SNPPARSQSSDTEQQSPTSGGGKVAPAQPSE	0.998695
P06730	Eukaryotic translation initiation factor 4E	EIF4E	T	11	_____MATVEPETTPTPNPPTTEEEKTESNQ	0.91115
Q9NRA8	Eukaryotic translation initiation factor 4E transporter	EIF4ENIF1	S	564	GSLEPTTSLLGQRAPSPPLSQVFQTRAASAD	1
Q9NRA8	Eukaryotic translation initiation factor 4E transporter	EIF4ENIF1	S	587	QTRAASADYLRPRIPSPIGFTPGPQQLLGDP	0.99995
Q9NRA8	Eukaryotic translation initiation factor 4E transporter	EIF4ENIF1	S	951	HMHSQLEHRPSQRSSSPVGLAKWFGSDVLQQ	0.999993
Q04637-3	Eukaryotic translation initiation factor 4 gamma 1	EIF4G1	S	1198	REAALPPVSPLKAALSEEELEKKSKAIIEEY	1
Q04637-3	Eukaryotic translation initiation factor 4 gamma 1	EIF4G1	S	1169	SRERPSQPEGLRKAASLTEDRDRGRDAVKRE	0.998225
Q04637-3	Eukaryotic translation initiation factor 4 gamma 1	EIF4G1	S	1191	RGRDAVKREAALPPVSPLKAALSEEELEKKS	1
Q04637-3	Eukaryotic translation initiation factor 4 gamma 1	EIF4G1	S	1556	SVTAFFKWLREAEEESDHN____________	1
A0A0A0MSA7	Eukaryotic translation initiation factor 4 gamma 3	EIF4G3	S	1110	TIDEKIQLVPKAQLGSWGKGSSGGAKASETD	1
A0A0A0MSA7	Eukaryotic translation initiation factor 4 gamma 3	EIF4G3	S	231	KQEEKPKPDPVLKSPSPVLRLVLSGEKKEQE	0.998725
P63241	Eukaryotic translation initiation factor 5A-1;Eukaryotic translation initiation factor 5A;Eukaryotic translation initiation factor 5A-1-like	EIF5A;EIF5AL1	T	9	_______MADDLDFETGDAGASATFPMQCSA	0.999891
O60841	Eukaryotic translation initiation factor 5B	EIF5B	S	66	QDFDEDDILKELEELSLEAQGIKADRETVAV	1
O60841	Eukaryotic translation initiation factor 5B	EIF5B	S	1168	KGQEVCVKIEPIPGESPKMFGRHFEATDILV	1
O60841	Eukaryotic translation initiation factor 5B	EIF5B	S	107	TSKDKKKKGQKGKKQSFDDNDSEELEDKDSK	1
O60841	Eukaryotic translation initiation factor 5B	EIF5B	S	113	KKGQKGKKQSFDDNDSEELEDKDSKSKKTAK	1
O60841	Eukaryotic translation initiation factor 5B	EIF5B	S	164	KAKGKAQKSNKKWDGSEEDEDNSKKIKERSR	1
O60841	Eukaryotic translation initiation factor 5B	EIF5B	S	214	GQKKNQKNKPGPNIESGNEDDDASFKIKTVA	1
O60841	Eukaryotic translation initiation factor 5B	EIF5B	T	301	TVDTGVIPASEEKAETPTAAEDDNEGDKKKK	0.999994
O60841	Eukaryotic translation initiation factor 5B	EIF5B	S	182	DEDNSKKIKERSRINSSGESGDESDEFLQSR	0.762751
O60841	Eukaryotic translation initiation factor 5B	EIF5B	S	183	EDNSKKIKERSRINSSGESGDESDEFLQSRK	0.880001
O60841	Eukaryotic translation initiation factor 5B	EIF5B	S	190	KERSRINSSGESGDESDEFLQSRKGQKKNQK	0.992636
Q9BQ52	Zinc phosphodiesterase ELAC protein 2	ELAC2	S	199	PIHSEQRRGKHQPWQSPERPLSRLSPERSSD	0.999937
Q9BQ52	Zinc phosphodiesterase ELAC protein 2	ELAC2	S	736	MLNHFSQRYAKVPLFSPNFSEKVGVAFDHMK	0.956287
Q15717	ELAV-like protein 1	ELAVL1	S	202	PNQNKNVALLSQLYHSPARRFGGPVHHQAQR	1
Q15717	ELAV-like protein 1	ELAVL1	S	88	DAERAINTLNGLRLQSKTIKVSYARPSSEVI	1
Q15717	ELAV-like protein 1	ELAVL1	T	80	FVNYVTAKDAERAINTLNGLRLQSKTIKVSY	1
P32519	ETS-related transcription factor Elf-1	ELF1	S	187	PKRKKGRKTKPPRPDSPATTPNISVKKKNKD	0.906821
P32519	ETS-related transcription factor Elf-1	ELF1	S	163	PEVMETQQVQEKYADSPGASSPEQPKRKKGR	1
P32519	ETS-related transcription factor Elf-1	ELF1	S	168	TQQVQEKYADSPGASSPEQPKRKKGRKTKPP	0.934815
P32519	ETS-related transcription factor Elf-1	ELF1	S	163	PEVMETQQVQEKYADSPGASSPEQPKRKKGR	1
P32519	ETS-related transcription factor Elf-1	ELF1	S	168	TQQVQEKYADSPGASSPEQPKRKKGRKTKPP	0.934815
Q15723	ETS-related transcription factor Elf-2	ELF2	S	424	AVQSVNAGAPLITSTSPTTATSPKVVIQTIP	0.89767
P28324	ETS domain-containing protein Elk-4	ELK4	S	180	LIKTENPAEKLAEKKSPQEPTPSVIKFVTTP	0.999912
Q6PJG2	ELM2 and SANT domain-containing protein 1	ELMSAN1	S	461	LRGGVIQSTRRRRRASQEANLLTLAQKAVEL	1
Q96AY2	Crossover junction endonuclease EME1	EME1	S	117	CKFLTHKQLSPEDSSSPVKSVLDHQNNEGAS	0.787718
Q32P44	Echinoderm microtubule-associated protein-like 3	EML3	S	198	RSGSTESRGGKDPLSSPGGPGSRRSNYNLEG	0.997374
Q32P44	Echinoderm microtubule-associated protein-like 3	EML3	T	881	QWRVLGAGGAGPAPATPSRTPSLSPASSLDV	0.786797
Q9HC35	Echinoderm microtubule-associated protein-like 4	EML4	S	176	PESKNATPTKSIKRPSPAEKSHNSWENSDDS	1
Q7Z589	Protein EMSY	EMSY	S	385	GVSTSAIKMASTRLPSPKSLVSAPTQILAQF	0.97631
Q7Z589	Protein EMSY	EMSY;C11orf30	S	1130	TVTKITGGSSVPKLTSPVTSISPIQASEKTA	0.765685
Q8N8S7-2	Protein enabled homolog	ENAH	S	508	TRKPWERTNTMNGSKSPVISRPKSTPLSQPS	0.999968
P06733	Alpha-enolase	ENO1	S	310	PFDQDDWGAWQKFTASAGIQVVGDDLTVTNP	0.994352
P06733	Alpha-enolase;Enolase	ENO1	S	79	KAVEHINKTIAPALVSKKLNVTEQEKIDKLM	1
P06733	Alpha-enolase;Enolase	ENO1	T	85	NKTIAPALVSKKLNVTEQEKIDKLMIEMDGT	1
O43768	Alpha-endosulfine	ENSA	S	2	______________MSQKQEEENPAEETGEE	1
Q09472	Histone acetyltransferase p300	EP300	S	12	____MAENVVEPGPPSAKRPKLSSPALSASA	1
Q09472	Histone acetyltransferase p300	EP300	S	1038	IKEEEDQPSTSATQSSPAPGQSKKKIFKPEE	0.979668
Q09472	Histone acetyltransferase p300	EP300	S	1561	KNAKKKNNKKTSKNKSSLSRGNKKKPGMPNV	1
Q09472	Histone acetyltransferase p300	EP300	S	1562	NAKKKNNKKTSKNKSSLSRGNKKKPGMPNVS	1
Q09472	Histone acetyltransferase p300	EP300	S	1564	KKKNNKKTSKNKSSLSRGNKKKPGMPNVSND	1
P11171	Protein 4.1	EPB41	S	684	EDLDKSQEEIKKHHASISELKKNFMESVPEP	0.992517
P11171	Protein 4.1	EPB41	S	188	GEGLEECSKIEVKEESPQSKAETELKASQKP	1
P11171	Protein 4.1	EPB41	S	188	GEGLEECSKIEVKEESPQSKAETELKASQKP	1
P11171	Protein 4.1	EPB41	S	191	LEECSKIEVKEESPQSKAETELKASQKPIRK	1
Q9Y6I3	Epsin-1	EPN1	S	435	SAGELELLAGEVPARSPGAFDMSGVRGSLAE	1
Q9Y6I3	Epsin-1	EPN1	T	470	PPPAATPTPTPPTRKTPESFLGPNAALVDLD	0.931834
A0A075B730	Epiplakin	EPPK1	S	595	YLQGTGCIAGLLLPGSQERLSIYEARCKGLL	0.999976
P07814	Bifunctional glutamate/proline--tRNA ligase;Glutamate--tRNA ligase;Proline--tRNA ligase	EPRS	S	998	DGQRKDPSKNQGGGLSSSGAGEGQGPKKQTR	0.870762
P07814	Bifunctional glutamate/proline--tRNA ligase;Glutamate--tRNA ligase;Proline--tRNA ligase	EPRS	S	999	GQRKDPSKNQGGGLSSSGAGEGQGPKKQTRL	0.989774
P07814	Bifunctional glutamate/proline--tRNA ligase;Glutamate--tRNA ligase;Proline--tRNA ligase	EPRS	S	1000	QRKDPSKNQGGGLSSSGAGEGQGPKKQTRLG	0.997291
P07814	Bifunctional glutamate/proline--tRNA ligase;Glutamate--tRNA ligase;Proline--tRNA ligase	EPRS	S	434	YIWEYSRLNLNNTVLSKRKLTWFVNEGLVDG	0.999671
P42566	Epidermal growth factor receptor substrate 15	EPS15	S	796	PCPLPPGKRSINKLDSPDPFKLNDPFQPFPG	1
P42566	Epidermal growth factor receptor substrate 15	EPS15	S	814	PFKLNDPFQPFPGNDSPKEKDPEIFCDPFTS	1
P42566	Epidermal growth factor receptor substrate 15	EPS15	S	324	PPSDRASLQKNIIGSSPVADFSAIKELDTLN	0.910346
Q9UBC2	Epidermal growth factor receptor substrate 15-like 1	EPS15L1	S	255	PSHGSVSSLNSTGSLSPKHSLKQTQPTVNWV	0.985598
Q9UBC2	Epidermal growth factor receptor substrate 15-like 1	EPS15L1	S	229	RKKTVFPGAVPVLPASPPPKDSLRSTPSHGS	1
Q9UBC2	Epidermal growth factor receptor substrate 15-like 1	EPS15L1	S	697	TKNDPFTSDPFTKNPSLPSKLDPFESSDPFS	0.999601
Q9UBC2	Epidermal growth factor receptor substrate 15-like 1	EPS15L1	S	700	DPFTSDPFTKNPSLPSKLDPFESSDPFSSSS	0.999598
Q96J88	Epithelial-stromal interaction protein 1	EPSTI1	S	130	SETEVRQKQQLQLMQSKYKQKLKREESVRIK	0.765237
Q8IUD2	ERC protein 2;ELKS/Rab6-interacting/CAST family member 1	ERC2;ERC1	S	191	DSKLGSSMNSIKTFWSPELKKERVLRKEEAA;ESKLSSSMNSIKTFWSPELKKERALRKDEAS	1
P28715	DNA repair protein complementing XP-G cells	ERCC5;BIVM-ERCC5	S	341	CEKLKTEKEPDATPPSPRTLLAMQAALLGSS	0.999944
P28715	DNA repair protein complementing XP-G cells	ERCC5;BIVM-ERCC5	S	563	ELCPYESKFDSSLLSSDDETKCKPNSASEVI	0.998946
P28715	DNA repair protein complementing XP-G cells	ERCC5;BIVM-ERCC5	S	562	NELCPYESKFDSSLLSSDDETKCKPNSASEV	0.999551
P28715	DNA repair protein complementing XP-G cells	ERCC5;BIVM-ERCC5	S	563	ELCPYESKFDSSLLSSDDETKCKPNSASEVI	0.998946
Q2NKX8	DNA excision repair protein ERCC-6-like	ERCC6L	S	1028	VVVKAKIRSKARRIVSDGEDEDDSFKDTSSI	0.999917
Q2NKX8	DNA excision repair protein ERCC-6-like	ERCC6L	S	1069	SSVKQFDASTPKNDISPPGRFFSSQIPSSVN	0.999984
Q9NX77	Endogenous retrovirus group K member 13-1 Env polyprotein;Surface protein;Transmembrane protein	ERVK13-1	T	178	WKLAAALSGIKIWNTTYQLLRTKTKTPTFNI	0.992094
Q9NX77	Endogenous retrovirus group K member 13-1 Env polyprotein;Surface protein;Transmembrane protein	ERVK13-1	Y	179	KLAAALSGIKIWNTTYQLLRTKTKTPTFNIT	0.988707
Q5FWF5	N-acetyltransferase ESCO1	ESCO1	S	523	SNKNFSQCLESKLENSPVENVTAASTLLSQA	1
Q56NI9	N-acetyltransferase ESCO2	ESCO2	T	5	___________MAALTPRKRKQDSLKCDSLL	1
Q9H501	ESF1 homolog	ESF1	S	663	KQKALAEEASEEELPSDVDLNDPYFAEEVKQ	1
Q9H501	ESF1 homolog	ESF1	S	694	IGINKKSVKSAKDGTSPEEEIEIERQKAEMA	0.821661
Q9H501	ESF1 homolog	ESF1	S	153	KKMKTSCKFKIDSNISPKKDSKEFTQKNKKE	1
Q9H501	ESF1 homolog	ESF1	S	657	KKRLKRKQKALAEEASEEELPSDVDLNDPYF	1
Q9H501	ESF1 homolog	ESF1	S	663	KQKALAEEASEEELPSDVDLNDPYFAEEVKQ	1
P11474	Steroid hormone receptor ERR1	ESRRA	S	19	QVVGIEPLYIKAEPASPDSPKGSSETETEPP	0.970931
Q9BSJ8-2	Extended synaptotagmin-1	ESYT1	S	973	TSSAPELRQRLTHVDSPLEAPAGPLGQVKLT	1
Q9BSJ8-2	Extended synaptotagmin-1	ESYT1	S	1044	NRGTKRRTSQKKRTLSPEFNERFEWELPLDE	0.995236
A0FGR8-2	Extended synaptotagmin-2	ESYT2	S	727	LLASPGHISVKEPTPSIASDISLPIATQELR	0.863991
P41212	Transcription factor ETV6	ETV6	S	213	QRPLRSPLDNMIRRLSPAERAQGPRPHQENN	1
P41212	Transcription factor ETV6	ETV6	S	203	TNHRPSPDPEQRPLRSPLDNMIRRLSPAERA	1
P41212	Transcription factor ETV6	ETV6	S	271	SSPRQESTRVIQLMPSPIMHPLILNPRHSVD	1
P41212	Transcription factor ETV6	ETV6	S	22	QCSIKQERISYTPPESPVPSYASSTPLHVPV	0.986771
P41212	Transcription factor ETV6	ETV6	T	18	ETPAQCSIKQERISYTPPESPVPSYASSTPL	0.991346
P34910-2	Protein EVI2B	EVI2B	S	309	KSTLLADDLEIKLFESSENIEDSNNPKTEKI	0.998521
Q9NV70-2	Exocyst complex component 1	EXOC1	S	448	MTGTTKESKKFGLHGSSGKLTGSTSSLNKLS	0.987076
Q9NV70-2	Exocyst complex component 1	EXOC1	S	455	SKKFGLHGSSGKLTGSTSSLNKLSVQSSGNR	0.99783
Q9NV70-2	Exocyst complex component 1	EXOC1	S	458	FGLHGSSGKLTGSTSSLNKLSVQSSGNRRSQ	0.932782
Q9NV70-2	Exocyst complex component 1	EXOC1	S	455	SKKFGLHGSSGKLTGSTSSLNKLSVQSSGNR	0.99783
Q9NV70-2	Exocyst complex component 1	EXOC1	S	458	FGLHGSSGKLTGSTSSLNKLSVQSSGNRRSQ	0.932782
Q96A65	Exocyst complex component 4	EXOC4	S	226	RNKEKGKISSLVKDASVPLIDVTNLPTPRKF	0.999977
Q15024	Exosome complex component RRP42	EXOSC7	S	177	NTRIPRVRVLEDEEGSKDIELSDDPYDCIRL	1
Q06265-3	Exosome complex component RRP45	EXOSC9	S	222	QRITAFKMEKAPIDTSDVEEKAEEIIAEAEP	0.996773
Q15910	Histone-lysine N-methyltransferase EZH2	EZH2	T	345	GAKEFAAALTAERIKTPPKRPGGRRRGRLPN	0.991234
Q15910	Histone-lysine N-methyltransferase EZH2	EZH2	T	487	KESSIIAPAPAEDVDTPPRKKKRKHRLWAAH	1
P26038	Ezrin;Moesin;Radixin	EZR;MSN;RDX	T	558	IIHNENMRQGRDKYKTLRQIRQGNTKQRIDE;MIHAENMRLGRDKYKTLRQIRQGNTKQRIDE;VLHAENVKAGRDKYKTLRQIRQGNTKQRIDE	0.999974
Q9Y624	Junctional adhesion molecule A	F11R	S	287	GTSSKKVIYSQPSARSEGEFKQTSSFLV___	0.999818
Q9Y624	Junctional adhesion molecule A	F11R	S	284	TKKGTSSKKVIYSQPSARSEGEFKQTSSFLV	0.998778
Q9Y624	Junctional adhesion molecule A	F11R	S	287	GTSSKKVIYSQPSARSEGEFKQTSSFLV___	0.999818
Q0VG06	Fanconi anemia-associated protein of 100 kDa	FAAP100;C17orf70	S	667	CLRFPGLAPPHTRAPSPLGPTRDPVATFLET	0.999949
Q9UNN5	FAS-associated factor 1	FAF1	S	582	EENAEPVSKLRIRTPSGEFLERRFLASNKLQ	0.999374
Q8N5W9	Filamin-interacting protein FAM101B	FAM101B	S	6	__________MVGRLSLQDVPELVDAKKKGD	1
Q5T8I3	Protein FAM102B	FAM102B	S	288	DTASEKLSRCPVKQDSVESQLKRVDDTRVDA	0.997343
Q9BTL3	RNMT-activating mini protein	FAM103A1	S	36	ENDKEYQEYLKRPPESPPIVEEWNSRAGGNQ	1
Q9NRY5	Protein FAM114A2	FAM114A2	S	146	KYVAGETNAKENENSSPVAGAFGVFSTISTA	0.800584
Q6P1L5	Protein FAM117B	FAM117B	S	449	DDLLVDPRDKENGNNSPLPKYATSPKPNNSY	1
Q6P1L5	Protein FAM117B	FAM117B	S	10	______MSQRVRRNGSPTPAGSLGGGAVATA	0.983493
Q9NWS6	Protein FAM118A	FAM118A	S	349	KLEENGIEVSKKRTQSDTDDAGGS_______	0.755189
Q96E09	Protein FAM122A	FAM122A	S	76	NSTTFPSRHGLLLPASPVRMHSSRLHQIKQE	1
Q96E09	Protein FAM122A	FAM122A	S	147	ASPKRIDFIPVSPAPSPTRGIGKQCFSPSLQ	0.944371
Q96E09	Protein FAM122A	FAM122A	S	62	TSPVFQAEAPSARRNSTTFPSRHGLLLPASP	0.831226
Q96E09	Protein FAM122A	FAM122A	S	143	VEKSASPKRIDFIPVSPAPSPTRGIGKQCFS	0.999979
Q96E09	Protein FAM122A	FAM122A	S	147	ASPKRIDFIPVSPAPSPTRGIGKQCFSPSLQ	0.944371
Q96E09	Protein FAM122A	FAM122A	S	270	CNSPAKVSTTTDSPVSPAQAASPFIPLDELS	0.823783
Q7Z309-3	Protein FAM122B	FAM122B;SPACIA2	S	64	NSTTIMSRHSLLLSSSPNRIPSSRLHQIKRE	0.841115
Q7Z309-3	Protein FAM122B	FAM122B;SPACIA2	S	138	YSPKRIDFTPVSPAPSPTRGFGKMFVSSSGL	0.930997
Q7Z309-3	Protein FAM122B	FAM122B;SPACIA2	S	134	PEKLYSPKRIDFTPVSPAPSPTRGFGKMFVS	0.997178
Q7Z309-3	Protein FAM122B	FAM122B;SPACIA2	S	138	YSPKRIDFTPVSPAPSPTRGFGKMFVSSSGL	0.930997
Q7Z309-3	Protein FAM122B	FAM122B;SPACIA2	T	140	PKRIDFTPVSPAPSPTRGFGKMFVSSSGLPP	0.781522
Q8IXS8	Protein FAM126B	FAM126B	S	508	QEDRLGQAGEGKELLSPGAPLTKQSRSPSFN	1
Q96TA1	Niban-like protein 1	FAM129B	S	692	PAGESPQPKAAPEASSPPASPLQHLLPGKAV	0.86131
Q96TA1	Niban-like protein 1	FAM129B	S	692	PAGESPQPKAAPEASSPPASPLQHLLPGKAV	0.86131
Q96TA1	Niban-like protein 1	FAM129B	S	696	SPQPKAAPEASSPPASPLQHLLPGKAVDLGP	0.999942
Q8NC44	Protein FAM134A	FAM134A	S	385	DLLGRPQALSRQALDSEEEEEDVAAKETLLR	1
Q86VR2	Protein FAM134C	FAM134C	S	26	PGPASGSTFRGRRDVSGSWERDQQVEAAQRA	0.99995
Q86VR2	Protein FAM134C	FAM134C	S	320	GQTPLTEGSEDLDGHSDPEESFARDLPDFPS	0.998985
Q86VR2	Protein FAM134C	FAM134C	T	10	______MAEAEGVPTTPGPASGSTFRGRRDV	0.998618
Q86VR2	Protein FAM134C	FAM134C	S	313	GTFNLSRGQTPLTEGSEDLDGHSDPEESFAR	0.943531
Q86VR2	Protein FAM134C	FAM134C	S	320	GQTPLTEGSEDLDGHSDPEESFARDLPDFPS	0.998985
Q8NDB6	Protein FAM156A/FAM156B	FAM156A;FAM156B	S	11	_____MDPLQKRNPASPSKSSPMTAAETSQE	0.979316
Q8N612	FTS and Hook-interacting protein	FAM160A2	S	859	PAPRRSDPLVKSRRPSLGELLLRHAHSPTRA	1
Q6UWZ7	BRCA1-A complex subunit Abraxas	FAM175A	S	406	DEEIEKMKGFGEYSRSPTF____________	0.997241
Q8IX21	Protein FAM178A	FAM178A	S	340	AGSKQNKFPEKRKRNSVDSDLKSTRESMIPK	0.999999
A6NE01	Protein FAM186A	FAM186A	S	2095	SSVSDTKKPKVMVPPSSPQELEEKRYFVDVE	1
A6NE01	Protein FAM186A	FAM186A	S	2096	SVSDTKKPKVMVPPSSPQELEEKRYFVDVEA	1
H3BNK9		FAM192A	S	25	NGRKFENLKIQKVGISQENKKEVEKKLTVKP	1
P78312	Protein FAM193A	FAM193A	S	1144	SPGEHQQNSKLVLAESPQPKGKNKKNKKKKG	1
Q9BUT9	Protein FAM195A	FAM195A	S	78	GPRLVFNRVNGRRAPSTSPSFEGTQETYTVA	0.780805
Q9NSI2	Protein FAM207A	FAM207A	T	34	KGEAAPGPAPPAPEATPPPASAAGKDWAFIN	0.999996
Q9UK61	Protein FAM208A	FAM208A	S	1103	IIIKASAKGGNLPPVSPNDSGAKIASNPLER	0.997901
Q9UK61	Protein FAM208A	FAM208A	S	927	EIHWKLIPITGGNARSPEDQLGKHGEKQTPG	1
Q9UK61	Protein FAM208A	FAM208A	S	1193	VPGDMAREPVEETTKSPSDVNISAQPALSNF	0.773555
Q9UK61	Protein FAM208A	FAM208A	S	694	DRVKELINLIQCRKKSVGGDSDTEDMRSKTV	0.999999
Q5VWN6	Protein FAM208B	FAM208B	S	2009	DSQHSASSANVFPKESPTQISIGAFPSTKIS	0.982624
Q5VWN6	Protein FAM208B	FAM208B	S	685	EREILSPLFPRNGTKSPEAATPVGKVMPFRH	1
Q5VWN6	Protein FAM208B	FAM208B	S	489	PRNRKQLQPVKGETASKLQSEISRGCQEDGI	1
Q5VWN6	Protein FAM208B	FAM208B	T	487	ENPRNRKQLQPVKGETASKLQSEISRGCQED	1
Q641Q2	WASH complex subunit FAM21A	FAM21A	S	539	NLKPSSETKTQKGLFSDEEDSEDLFSSQSAS	1
A0A0A0MR88	WASH complex subunit FAM21C	FAM21C	S	663	SGTLQSQEAKAVKKTSLFEEDKEDDLFAIAK	0.811413
Q641Q2	WASH complex subunit FAM21C;WASH complex subunit FAM21A	FAM21C;FAM21A	S	498	FGDEEGDLFKEKAVASPEATVSQTDENKARA	1
Q641Q2	WASH complex subunit FAM21C;WASH complex subunit FAM21A	FAM21C;FAM21A	S	333	KPRKTLKEKKERRTPSDDEEDNLFAPPKLTD	1
Q641Q2	WASH complex subunit FAM21C;WASH complex subunit FAM21A	FAM21C;FAM21A	S	728	TKKKETVSEAPPLLFSDEEEKEAQLGVKSVD	1
Q641Q2	WASH complex subunit FAM21C;WASH complex subunit FAM21A	FAM21C;FAM21A	S	352	EDNLFAPPKLTDEDFSPFGSGGGLFSGGKGL	1
Q641Q2	WASH complex subunit FAM21C;WASH complex subunit FAM21A	FAM21C;FAM21A	S	478	FSAPHSKPSKTGKVQSTADIFGDEEGDLFKE	0.998457
Q641Q2	WASH complex subunit FAM21C;WASH complex subunit FAM21A	FAM21C;FAM21A	T	331	EAKPRKTLKEKKERRTPSDDEEDNLFAPPKL	1
Q641Q2	WASH complex subunit FAM21C;WASH complex subunit FAM21A	FAM21C;FAM21A	S	333	KPRKTLKEKKERRTPSDDEEDNLFAPPKLTD	1
Q641Q2	WASH complex subunit FAM21C;WASH complex subunit FAM21A	FAM21C;FAM21A	T	331	EAKPRKTLKEKKERRTPSDDEEDNLFAPPKL	1
Q641Q2	WASH complex subunit FAM21C;Putative WASH complex subunit FAM21;WASH complex subunit FAM21A	FAM21C;FAM21D;FAM21A	S	1075	SVPRGPIAQWADGAISPNGHRPQLRAASGED	1
F5H4B4	Protein FAM227A	FAM227A	T	37	EHLAVSLVARNTMVKTVRKELENNPPSCLIG	0.83658
Q9NYF3	Protein FAM53C	FAM53C	S	234	AESLSPCPPQRRFSLSPSLGPQASRFLPSAR	0.999026
Q9NYF3	Protein FAM53C	FAM53C	S	232	SDAESLSPCPPQRRFSLSPSLGPQASRFLPS	0.999984
Q9NYF3	Protein FAM53C	FAM53C	S	234	AESLSPCPPQRRFSLSPSLGPQASRFLPSAR	0.999026
Q9NP50	Protein FAM60A	FAM60A	S	105	LKPKKVKTLSGNRIKSNQISKLQKEFKRHNS	1
Q9NP50	Protein FAM60A	FAM60A	S	109	KVKTLSGNRIKSNQISKLQKEFKRHNSDAHS	1
Q6ZS17	Protein FAM65A	FAM65A	S	5	___________MMSLSVRPQRRLLSARVNRS	0.999967
Q5HYJ3	Protein FAM76B	FAM76B	S	193	HHHRHSSSHHKISNLSPEEEQGLWKQSHKSS	1
Q658Y4	Protein FAM91A1	FAM91A1	S	671	VTMLNASSQLADRKLSDASDERGEPDLASGS	0.99976
A1XBS5	Protein FAM92A1	FAM92A1	T	5	___________MMRRTLENRNAQTKQLQTAV	1
Q9BXW9	Fanconi anemia group D2 protein	FANCD2	S	1435	ASKSKATEDGEEDEVSAGEKEQDSDESYDDS	1
Q9BXW9	Fanconi anemia group D2 protein	FANCD2	S	592	GAVTMAGIMAADRSESPSLTQERANLSDEQC	0.99887
Q9HB96	Fanconi anemia group E protein	FANCE	S	247	ERPEHKSLESLADGGSASPIKDQPVMAVKTG	0.836959
Q9HB96	Fanconi anemia group E protein	FANCE	S	249	PEHKSLESLADGGSASPIKDQPVMAVKTGED	0.973825
Q9NVI1	Fanconi anemia group I protein	FANCI	S	7	_________MDQKILSLAAEKTADKLQEFLQ	1
Q9NVI1	Fanconi anemia group I protein	FANCI	T	13	___MDQKILSLAAEKTADKLQEFLQTLREGD	1
H0YJS3		FANCM	T	106	MTFVGHASGKSTKGFTQKEQLEIYNQSQSNK	0.997787
P49327	Fatty acid synthase;[Acyl-carrier-protein] S-acetyltransferase;[Acyl-carrier-protein] S-malonyltransferase;3-oxoacyl-[acyl-carrier-protein] synthase;3-oxoacyl-[acyl-carrier-protein] reductase;3-hydroxyacyl-[acyl-carrier-protein] dehydratase;Enoyl-[acyl-carrier-protein] reductase;Oleoyl-[acyl-carrier-protein] hydrolase	FASN	S	1174	MVVPGLDGAQIPRDPSQQELPRLLSAACRLQ	1
P49327	Fatty acid synthase;[Acyl-carrier-protein] S-acetyltransferase;[Acyl-carrier-protein] S-malonyltransferase;3-oxoacyl-[acyl-carrier-protein] synthase;3-oxoacyl-[acyl-carrier-protein] reductase;3-hydroxyacyl-[acyl-carrier-protein] dehydratase;Enoyl-[acyl-carrier-protein] reductase;Oleoyl-[acyl-carrier-protein] hydrolase	FASN	S	1411	YGSTLFLCRRPTPQDSPIFLPVDDTSFRWVE	0.980697
P22087	rRNA 2'-O-methyltransferase fibrillarin	FBL	S	124	KNLVPGESVYGEKRVSISEGDDKIEYRAWNP	0.995501
Q9HCM7	Fibrosin-1-like protein	FBRSL1	S	790	QERDLLEKTRLLSRASPATPAGHPVSGLLLR	0.989141
Q96ME1	F-box/LRR-repeat protein 18	FBXL18	S	327	KFNNPFYFSFSRCTLSGGHLIQQVINGGKDL	0.967067
Q96IG2	F-box/LRR-repeat protein 20	FBXL20	T	417	THLPNIKVHAYFAPVTPPPSVGGSRQRFCRC	0.999878
Q96IG2	F-box/LRR-repeat protein 20	FBXL20	S	421	NIKVHAYFAPVTPPPSVGGSRQRFCRCCIIL	0.96136
Q96IG2	F-box/LRR-repeat protein 20	FBXL20	T	417	THLPNIKVHAYFAPVTPPPSVGGSRQRFCRC	0.999878
J3KNU2		FBXO16	T	261	FSRQSHDKKNKLQDRTRLRKAQSMMSLSASS	0.999443
Q6P3S6	F-box only protein 42	FBXO42	S	488	GYDLKIGLSLAPRRGSLPDQKDLRLGSIDLN	0.999978
Q96P31	Fc receptor-like protein 3	FCRL3	T	75	HDEKLLKIKHDKIQITEPGNYQCKTRGSSLS	1
Q96P31	Fc receptor-like protein 3	FCRL3	T	75	HDEKLLKIKHDKIQITEPGNYQCKTRGSSLS	1
Q96P31	Fc receptor-like protein 3	FCRL3	Y	80	LKIKHDKIQITEPGNYQCKTRGSSLSDAVHV	1
P14324	Farnesyl pyrophosphate synthase	FDPS	S	73	PRALCSSLRMNGDQNSDVYAQEKQDFVQHFS	0.999944
Q5JSP0	FYVE, RhoGEF and PH domain-containing protein 3	FGD3	S	128	LDSQVPKVTPQEEADSDVGEEPDSENTPQKA	0.999998
O95684	FGFR1 oncogene partner	FGFR1OP	S	156	GPTTGEGALDLSDVHSPPKSPEGKTSAQTTP	0.999997
O95684	FGFR1 oncogene partner	FGFR1OP	S	156	GPTTGEGALDLSDVHSPPKSPEGKTSAQTTP	0.999997
O95684	FGFR1 oncogene partner	FGFR1OP	S	160	GEGALDLSDVHSPPKSPEGKTSAQTTPSKIP	0.998492
Q9Y613	FH1/FH2 domain-containing protein 1	FHOD1	S	573	LNVESVEAGKDIPAPSPPLPLLSGVPPPPPL	0.989929
Q9Y613	FH1/FH2 domain-containing protein 1	FHOD1	S	523	QRSLAPEPKEPLIPASPKAEPIWELPTRAPR	1
H0Y8P7		FIP1L1	S	149	RERERTRERERERDHSPTPSVFNRFVGDEER	0.999947
Q6UN15	Pre-mRNA 3'-end-processing factor FIP1	FIP1L1	S	259	SEKETALPSTKAEFTSPPSLFKTGLPPSRNS;SEKETALPSTKAEFTSPPSLFKTGLPPSRRL	0.983556
Q6UN15	Pre-mRNA 3'-end-processing factor FIP1	FIP1L1	S	304	NSSVGKWQDRYGRAESPDLRRLPGAIDVIGQ	1
Q6UN15	Pre-mRNA 3'-end-processing factor FIP1	FIP1L1	S	492	RERERTRERERERDHSPTPSVFNSDEERYRY	0.999968
Q8N6M3	Fat storage-inducing transmembrane protein 2	FITM2	Y	59	LPESYLSNKRNVLNVYFVKVAWAWTFCLLLP	1
Q5T1M5	FK506-binding protein 15;Peptidyl-prolyl cis-trans isomerase	FKBP15	S	1012	QALTTSQDGHRRKGDSEAEALSEIKDGSLPP	1
Q5T1M5	FK506-binding protein 15;Peptidyl-prolyl cis-trans isomerase	FKBP15	S	344	TSIPFKSGEPALRTKSNSLSEQLAINTSPDA	0.815314
Q5T1M5	FK506-binding protein 15;Peptidyl-prolyl cis-trans isomerase	FKBP15	S	346	IPFKSGEPALRTKSNSLSEQLAINTSPDAVK	0.997657
Q02790	Peptidyl-prolyl cis-trans isomerase FKBP4;Peptidyl-prolyl cis-trans isomerase FKBP4, N-terminally processed	FKBP4	S	453	TEMKEEQKSNTAGSQSQVETEA_________	0.842395
Q13451	Peptidyl-prolyl cis-trans isomerase FKBP5;Peptidyl-prolyl cis-trans isomerase FKBP5, N-terminally processed	FKBP5	S	13	___MTTDEGAKNNEESPTATVAEQGEDITSK	1
Q9UIM3	FK506-binding protein-like	FKBPL	T	3	_____________METPPVNTIGEKDTSQPQ	0.999986
Q01543	Friend leukemia integration 1 transcription factor	FLI1	S	39	GAAAHLPKADMTASGSPDYGQPHKINPLPPQ	0.999111
Q01543	Friend leukemia integration 1 transcription factor	FLI1	S	241	RRGAWGNNMNSGLNKSPPLGGAQTISKNTEQ	1
Q01543-3	Friend leukemia integration 1 transcription factor	FLI1	S	6	__________MTASGSPDYGQPHKINPLPPQ	0.999923
P21333	Filamin-A	FLNA	S	1084	KVKAFGPGLQGGSAGSPARFTIDTKGAGTGG	0.999972
P21333	Filamin-A	FLNA	S	2180	KIPEISIQDMTAQVTSPSGKTHEAEIVEGEN	0.972256
P21333	Filamin-A	FLNA	T	2542	LHETSSVFVDSLTKATCAPQHGAPGPGPADA	0.999998
O75955	Flotillin-1	FLOT1	S	19	TCGPNEAMVVSGFCRSPPVMVAGGRVFVLPC	1
Q9Y5Y0	Feline leukemia virus subgroup C receptor-related protein 1	FLVCR1	S	536	NIGITNVDVKAIPADSPTDQEPKTVMLSKQS	0.774075
O95466-2	Formin-like protein 1	FMNL1	S	218	TIKLTPAHSRKALRNSRIVSQKDDVHVCIMC	0.999977
O95466-2	Formin-like protein 1	FMNL1	S	624	PPPPGGPPDALGRRDSELGPGVKAKKPIQTK	1
O95466-2	Formin-like protein 1	FMNL1	S	950	RQDDCMVLKEFLRANSPTMDKLLADSKTAQE	0.992958
O95466-2	Formin-like protein 1	FMNL1	S	1031	AGADTPGKGEPPAPKSPPKARRPQMDLISEL	1
O95466-2	Formin-like protein 1	FMNL1	S	184	DNGASNSEKNKPLEQSVEDLSKGPPSSVPKS	1
O95466-2	Formin-like protein 1	FMNL1	S	1103	RRRPPGPPLQVTSDLSL______________	0.999984
O95466-2	Formin-like protein 1	FMNL1	T	1020	EQWKKEAAAQEAGADTPGKGEPPAPKSPPKA	1
B7ZL14	Formin-binding protein 1	FNBP1	S	396	QMGDPASLDHKLAEVSQNIEKLRVETQKFEA	1
B7ZL14	Formin-binding protein 1	FNBP1	S	296	DIEFEDYTQPMKRTVSDNSLSNSRGEGKPDL	0.811037
Q8N3X1-2	Formin-binding protein 4	FNBP4	S	510	EKIDENSDKEMEVEESPEKIKVQTTPKVEEE	1
Q8N3X1-2	Formin-binding protein 4	FNBP4	S	18	KKSRAVPGRRPILQLSPPGPRGSTPGRDPEP	1
Q8N3X1-2	Formin-binding protein 4	FNBP4	T	519	EMEVEESPEKIKVQTTPKVEEEQDLKFQIGE	0.975695
Q8N3X1-2	Formin-binding protein 4	FNBP4	S	510	EKIDENSDKEMEVEESPEKIKVQTTPKVEEE	1
Q8N3X1-2	Formin-binding protein 4	FNBP4	S	501	ETAIGAENSEKIDENSDKEMEVEESPEKIKV	1
Q9Y2H6	Fibronectin type-III domain-containing protein 3A	FNDC3A	S	203	KKLKDRQGTQKDKMSSPPSSPQKCPSPINEH	0.999495
Q9P278	Folliculin-interacting protein 2	FNIP2	T	4	____________MAPTLLQKLFNKRGSSGSS	1
P49354	Protein farnesyltransferase/geranylgeranyltransferase type-1 subunit alpha	FNTA	S	373	YIGRSLQSKHSTENDSPTNVQQ_________	0.999119
P15408	Fos-related antigen 2	FOSL2	S	200	VAHGPVCKISPEERRSPPAPGLQPMRSGGGS	1
P85037	Forkhead box protein K1	FOXK1	S	299	AKAASEQQADTSGGDSPKDESKPPFSYAQLI	0.989017
P85037	Forkhead box protein K1	FOXK1	S	213	KIQFTSLYHKEEAPASPLRPLYPQISPLKIH	1
P85037	Forkhead box protein K1	FOXK1	S	223	EEAPASPLRPLYPQISPLKIHIPEPDLRSMV	1
P85037	Forkhead box protein K1	FOXK1	S	445	RSGGLQTPECLSREGSPIPHDPEFGSKLASV	1
P85037	Forkhead box protein K1	FOXK1	S	101	AAPALVAAAAASVRQSPGPALARLEGREFEF	1
P85037	Forkhead box protein K1	FOXK1	S	420	FRTPFGPLSSRSAPASPTHPGLMSPRSGGLQ	0.997343
U3KQ26		FOXK1	S	106	AKAASEQQADTSGGDSPKV____________	0.989017
P85037	Forkhead box protein K1	FOXK1	T	716	EVKRSRVEEPSGAVTTPAGVIAAAGPQGPGT	0.839536
P85037	Forkhead box protein K1	FOXK1	S	213	KIQFTSLYHKEEAPASPLRPLYPQISPLKIH	1
P85037	Forkhead box protein K1	FOXK1	S	223	EEAPASPLRPLYPQISPLKIHIPEPDLRSMV	1
P85037	Forkhead box protein K1	FOXK1	S	416	GVSCFRTPFGPLSSRSAPASPTHPGLMSPRS	1
P85037	Forkhead box protein K1	FOXK1	S	420	FRTPFGPLSSRSAPASPTHPGLMSPRSGGLQ	0.997343
Q01167	Forkhead box protein K2	FOXK2	S	30	PAGGGAGGGGAGGGGSPPGGWAVARLEGREF	1
Q01167	Forkhead box protein K2	FOXK2	S	398	HSSGAQTPESLSREGSPAPLEPEPGAAQPKL	1
Q01167	Forkhead box protein K2	FOXK2	S	170	TALSSEKREKQEASESPVKAVQPHISPLTIN	0.999966
Q01167	Forkhead box protein K2	FOXK2	T	13	___MAAAAAALSGAGTPPAGGGAGGGGAGGG	0.994903
Q08050	Forkhead box protein M1	FOXM1	S	481	PGEEMPHLARPIKVESPPLEEWPSPAPSFKE	1
Q8IVH2	Forkhead box protein P4	FOXP4	S	554	DEREYQKRRPPKMTGSPTLVKNMISGLSYGA	0.999474
O94915	Protein furry homolog-like	FRYL	S	2272	VVPSDIPKTYGGDTGSPEISFTKIFNNVSKE	0.999298
O94915	Protein furry homolog-like	FRYL	T	1959	LSLIGDRRGDRRRSNTLDIMDGRINHSSSLA	0.977785
P02794	Ferritin heavy chain;Ferritin heavy chain, N-terminally processed;Ferritin	FTH1	S	179	SGLAEYLFDKHTLGDSDNES___________	1
Q8IY81	pre-rRNA processing protein FTSJ3	FTSJ3	S	599	SPLYQDEAPKGTEASSGTEAATGLEGEEKDG	0.978934
Q9BWH2	FUN14 domain-containing protein 2	FUNDC2	S	151	EKDMKKAKEQLKIRKSNQIPTEVRSKAEEVV	1
Q92804	RNA-binding protein FUS;TATA-binding protein-associated factor 2N	FUS;TAF15	S	289	YTDKDTGKPKGEATVSFDDPPSAKAAIDWFD;YTDRETGKLKGEATVSFDDPPSAKAAIDWFD	0.993683
P22083	Alpha-(1,3)-fucosyltransferase 4	FUT4	Y	270	IQAHTAEEVDLRVLDYEEAAAAAEALATSSP	0.9972
P51114	Fragile X mental retardation syndrome-related protein 1	FXR1	S	587	EHGPSEKAINGPTSASGDDISKLQRTPGEEK	0.950431
O15117	FYN-binding protein	FYB	S	46	GIQARKNLFNNQGNASPPAGPSNVPKFGSPK	1
Q96QD9	UAP56-interacting factor	FYTTD1	S	23	LVGATATSSPPPKARSNENLDKIDMSLDDII	1
Q13283	Ras GTPase-activating protein-binding protein 1	G3BP1	S	232	PVLEETAPEDAQKSSSPAPADIAQTVQEDLR	0.992991
Q13283	Ras GTPase-activating protein-binding protein 1	G3BP1	S	149	QDEVFGGFVTEPQEESEEEVEEPEERQQTPE	0.999999
Q9UN86	Ras GTPase-activating protein-binding protein 2	G3BP2	T	227	QVEEKNLEELEEKSTTPPPAEPVSLPQEPPK	0.952213
O14976	Cyclin-G-associated kinase	GAK	S	73	QDVGSGREYALKRLLSNEEEKNRAIIQEVCF	1
O14976	Cyclin-G-associated kinase	GAK	S	16	MSLLQSALDFLAGPGSLGGASGRDQSDFVGQ	0.999504
Q86SF2	N-acetylgalactosaminyltransferase 7	GALNT7	T	368	RGAWDWSMLWKRVPLTPQEKRLRKTKTEPYR	1
P04406	Glyceraldehyde-3-phosphate dehydrogenase	GAPDH	S	210	LWRDGRGALQNIIPASTGAAKAVGKVIPELN	0.965684
P04406	Glyceraldehyde-3-phosphate dehydrogenase	GAPDH	S	83	VINGNPITIFQERDPSKIKWGDAGAEYVVES	1
P04406	Glyceraldehyde-3-phosphate dehydrogenase	GAPDH	T	184	GIVEGLMTTVHAITATQKTVDGPSGKLWRDG	0.997581
Q14C86	GTPase-activating protein and VPS9 domain-containing protein 1	GAPVD1	S	966	PSKDSSRGETEERKDSDDEKSDRNRPWWRKR	0.999978
Q14C86	GTPase-activating protein and VPS9 domain-containing protein 1	GAPVD1	S	914	RSRSSDIVSSVRRPMSDPSWNRRPGNEEREL	0.999952
Q14C86	GTPase-activating protein and VPS9 domain-containing protein 1	GAPVD1	S	902	FKQRHSYPERLVRSRSSDIVSSVRRPMSDPS	0.865337
P22102	Trifunctional purine biosynthetic protein adenosine-3;Phosphoribosylamine--glycine ligase;Phosphoribosylformylglycinamidine cyclo-ligase;Phosphoribosylglycinamide formyltransferase	GART	S	796	LIESMQINGSVLKNGSLTNHFSFEKKKARVA	0.999997
P22102	Trifunctional purine biosynthetic protein adenosine-3;Phosphoribosylamine--glycine ligase;Phosphoribosylformylglycinamidine cyclo-ligase;Phosphoribosylglycinamide formyltransferase	GART	S	802	INGSVLKNGSLTNHFSFEKKKARVAVLISGT	0.997348
P23769	Endothelial transcription factor GATA-2	GATA2	S	192	PPKEVSPDPSTTGAASPASSSAGGSAARGED	0.975475
Q86YP4	Transcriptional repressor p66-alpha	GATAD2A	S	100	MRTSHSDMKSERRPPSPDVIVLSDNEQPSSP	0.999995
Q86YP4	Transcriptional repressor p66-alpha	GATAD2A	S	107	MKSERRPPSPDVIVLSDNEQPSSPRVNGLTT	0.999997
Q8WXI9	Transcriptional repressor p66-beta	GATAD2B	S	486	QEQEIEQRLQQQAALSPTTAPAVSSVSKQET	0.996863
Q92538	Golgi-specific brefeldin A-resistance guanine nucleotide exchange factor 1	GBF1	S	1298	LQATARADAPDAGAQSDSELPSYHQNDVSLD	0.980573
Q8IWJ2	GRIP and coiled-coil domain-containing protein 2	GCC2	S	1483	MEAQLFQLKNEPTTRSPVSSQQSLKNLRERR	0.95513
Q8IWJ2	GRIP and coiled-coil domain-containing protein 2	GCC2	Y	571	ELENTIKNLQEKNGVYLLSLSQRDTMLKELE	0.999034
P16383	GC-rich sequence DNA-binding factor 2	GCFC2	S	96	APRADEGSESRTLDVSTDEEDKIHHSSESKD	0.995955
P16383	GC-rich sequence DNA-binding factor 2	GCFC2	T	97	PRADEGSESRTLDVSTDEEDKIHHSSESKDD	0.998429
Q8TB36	Ganglioside-induced differentiation-associated protein 1	GDAP1	S	11	_____MAERQEEQRGSPPLRAEGKADAEVKL	1
Q8TEQ6	Gem-associated protein 5	GEMIN5	S	757	KKKKKPTLRTPVKLESIDGNEEESMKENSGP	1
Q8TEQ6	Gem-associated protein 5	GEMIN5	S	48	RTSVFLVRVGPGAGESPGTPPFRVIGELVGH	0.876629
Q9H840	Gem-associated protein 7	GEMIN7	T	3	_____________MQTPVNIPVPVLRLPRGP	1
Q9NWZ8	Gem-associated protein 8	GEMIN8	S	117	YSSRIQASTKEDQALSKEEEMETESDAEVEC	1
Q99684	Zinc finger protein Gfi-1	GFI1	S	56	TSNAGGAKAEPRDRLSPESQLTEAPDRASAS	0.999963
Q9UJY4	ADP-ribosylation factor-binding protein GGA2	GGA2	S	177	KQDPKLPVDKILPPPSPWPKSSIFDADEEKS	1
Q9UJY4	ADP-ribosylation factor-binding protein GGA2	GGA2	S	327	QVMEGRVTFGNRVTSSLGDIPVSRVFQNPAG	0.900355
Q92820	Gamma-glutamyl hydrolase	GGH	S	290	FVNEARKNNHHFKSESEEEKALIYQFSPIYT	0.900598
Q9NWU2	Glucose-induced degradation protein 8 homolog	GID8	S	2	______________MSYAEKPDEITKDEWME	1
O75420	PERQ amino acid-rich with GYF domain-containing protein 1	GIGYF1	S	756	LLQQQQAVPVPPAPSSPPPLWAGLAKQGLSM	0.825892
Q6Y7W6	PERQ amino acid-rich with GYF domain-containing protein 2	GIGYF2	S	26	GPEWLRALSSGGSITSPPLSPALPKYKLADY	0.754667
Q6Y7W6	PERQ amino acid-rich with GYF domain-containing protein 2	GIGYF2	S	236	RLAGSRRDGERWRPHSPDGPRSAGWREHMER	1
Q9Y248	DNA replication complex GINS protein PSF2	GINS2	S	182	MYKLRTNLQPLESTQSQDF____________	0.999999
Q9Y2X7	ARF GTPase-activating protein GIT1	GIT1	S	592	SQEGSRHTSKLSRHGSGADSDYENTQSGDPL	0.948323
Q14161	ARF GTPase-activating protein GIT2	GIT2	S	418	LETTASKTNRQKSLDSDLSDGPVTVQEFMEV	0.956666
Q86VQ1	Glucocorticoid-induced transcript 1 protein	GLCCI1	S	398	TEDLLYDRDKDSGSSSPLPKYASSPKPNNSY	0.966073
Q53GS7	Nucleoporin GLE1	GLE1	S	88	STSASALDQPSFVPKSPDASSAFSPASPATP	0.999885
P10075	Zinc finger protein GLI4	GLI4	S	86	TFWPDSEPKPEQAPRSPGSQAPDEGAGGALR	0.999776
P00367	Glutamate dehydrogenase 1, mitochondrial;Glutamate dehydrogenase 2, mitochondrial	GLUD1;GLUD2	T	410	RVKAKIIAEGANGPTTPEADKIFLERNIMVI	0.810103
Q49A26-2	Putative oxidoreductase GLYR1	GLYR1	S	167	SERGSKSPLKRAQEQSPRKRGRPPKDEKDLT	1
Q49A26-2	Putative oxidoreductase GLYR1	GLYR1	S	130	EERSRPNSGDEKRKLSLSEGKVKKNMGEGKK	0.99742
Q9P107	GEM-interacting protein	GMIP	S	914	PITSVPRGSLRGRGPSPAAASPEGSPLRRTP	1
Q9P107	GEM-interacting protein	GMIP	S	919	PRGSLRGRGPSPAAASPEGSPLRRTPLPKHF	1
Q9P107	GEM-interacting protein	GMIP	S	919	PRGSLRGRGPSPAAASPEGSPLRRTPLPKHF	1
Q9P107	GEM-interacting protein	GMIP	S	923	LRGRGPSPAAASPEGSPLRRTPLPKHFEITQ	1
Q9P107	GEM-interacting protein	GMIP	S	914	PITSVPRGSLRGRGPSPAAASPEGSPLRRTP	1
Q9P107	GEM-interacting protein	GMIP	S	919	PRGSLRGRGPSPAAASPEGSPLRRTPLPKHF	1
Q9P107	GEM-interacting protein	GMIP	S	923	LRGRGPSPAAASPEGSPLRRTPLPKHFEITQ	1
P49915	GMP synthase [glutamine-hydrolyzing]	GMPS	S	332	RTPRKRISKTLNMTTSPEEKRKIIGDTFVKI	0.994375
P63092	Guanine nucleotide-binding protein G(s) subunit alpha isoforms short;Guanine nucleotide-binding protein G(s) subunit alpha isoforms XLas	GNAS	S	352	AKYFIRDEFLRISTASGDGRHYCYPHFTCAV	0.981093
P62873	Guanine nucleotide-binding protein G(I)/G(S)/G(T) subunit beta-1	GNB1	S	2	______________MSELDQLRQEAEQLKNQ	1
P62873	Guanine nucleotide-binding protein G(I)/G(S)/G(T) subunit beta-1	GNB1	T	29	LKNQIRDARKACADATLSQITNNIDPVGRIQ	0.979816
P63244	Guanine nucleotide-binding protein subunit beta-2-like 1;Guanine nucleotide-binding protein subunit beta-2-like 1, N-terminally processed	GNB2L1	T	2	______________MTEQMTLRGTLKGHNGW	0.999979
P63244	Guanine nucleotide-binding protein subunit beta-2-like 1;Guanine nucleotide-binding protein subunit beta-2-like 1, N-terminally processed	GNB2L1	T	10	______MTEQMTLRGTLKGHNGWVTQIATTP	0.954759
P50151	Guanine nucleotide-binding protein G(I)/G(S)/G(O) subunit gamma-10	GNG10	S	6	__________MSSGASASALQRLVEQLKLEA	0.994941
P63218	Guanine nucleotide-binding protein G(I)/G(S)/G(O) subunit gamma-5	GNG5	S	2	______________MSGSSSVAAMKKVVQQL	0.95603
P63218	Guanine nucleotide-binding protein G(I)/G(S)/G(O) subunit gamma-5	GNG5	S	4	____________MSGSSSVAAMKKVVQQLRL	0.887858
P36915	Guanine nucleotide-binding protein-like 1	GNL1	S	51	SRSGSRERREEQTDTSDGESVTHHIRRLNQQ	0.933335
Q9NVN8	Guanine nucleotide-binding protein-like 3-like protein	GNL3L	S	465	LGDTDPLEMEIKLLHSPMTKIADAIENKTTV	0.971503
Q08378	Golgin subfamily A member 3	GOLGA3	S	1392	GAAKTRKEPKGEASSSNPATPIKIPDCPVPA	0.992392
Q08378	Golgin subfamily A member 3	GOLGA3	S	1392	GAAKTRKEPKGEASSSNPATPIKIPDCPVPA	0.992392
Q08378	Golgin subfamily A member 3	GOLGA3	T	1396	TRKEPKGEASSSNPATPIKIPDCPVPASLLE	0.999981
Q13439	Golgin subfamily A member 4	GOLGA4	S	266	LEPQAEVFTKEENPESDGEPVVEDGTSVKTL	1
Q13439	Golgin subfamily A member 4	GOLGA4	S	89	SLFRSPIKESLFRSSSKESLVRTSSRESLNR	0.888653
Q13439	Golgin subfamily A member 4	GOLGA4	S	71	GDTQSFAQKLQLRVPSVESLFRSPIKESLFR	0.999985
Q13439	Golgin subfamily A member 4	GOLGA4	T	1719	ETLIVPRSAKNVAAYTEQEEADSQGCVQKTY	0.994172
O00461	Golgi integral membrane protein 4	GOLIM4	Y	673	QEVRDDNRPKGREEHYEEEEEEEEDGAAVAE	1
Q3T8J9	GON-4-like protein	GON4L	S	346	KEVVEKGVVIPTWNISPIKKANEIKPPQFVD	0.999999
Q3T8J9	GON-4-like protein;YY1-associated protein 1	GON4L;YY1AP1	S	1255	NAFQGLEPKLEPQELSPLSATVFPKVEHSPG	0.990575
Q9H8Y8	Golgi reassembly-stacking protein 2	GORASP2	S	409	PSDPATTTAKADAASSLTVDVTPPTAKAPTT	0.850101
Q9H8Y8	Golgi reassembly-stacking protein 2	GORASP2	T	415	TTAKADAASSLTVDVTPPTAKAPTTVEDRVG	0.824134
Q9H8Y8	Golgi reassembly-stacking protein 2	GORASP2	T	222	FEEGKKISLPGQMAGTPITPLKDGFTEVQLS	1
Q9H8Y8	Golgi reassembly-stacking protein 2	GORASP2	T	225	GKKISLPGQMAGTPITPLKDGFTEVQLSSVN	1
Q9H8Y8	Golgi reassembly-stacking protein 2	GORASP2	T	222	FEEGKKISLPGQMAGTPITPLKDGFTEVQLS	1
Q9H8Y8	Golgi reassembly-stacking protein 2	GORASP2	T	225	GKKISLPGQMAGTPITPLKDGFTEVQLSSVN	1
E9PCW1	Golgi SNAP receptor complex member 1	GOSR1	S	49	CTSYSHSSTRDGRRDSSDTTPLLNGSSQDRM	0.993886
Q8IXQ4	GPALPP motifs-containing protein 1	GPALPP1	S	105	FFGPALPPGFKKQDDSPPRPIIGPALPPGFI	1
Q8IXQ4	GPALPP motifs-containing protein 1	GPALPP1	S	140	KSDKGRDDPGQQETDSSEDEDIIGPMPAKGP	0.826475
Q8IXQ4	GPALPP motifs-containing protein 1	GPALPP1	S	141	SDKGRDDPGQQETDSSEDEDIIGPMPAKGPV	0.826475
Q9BRR8	G patch domain-containing protein 1	GPATCH1	S	6	__________MAARDSDSEEDLVSYGTGLEP	1
Q9BRR8	G patch domain-containing protein 1	GPATCH1	S	8	________MAARDSDSEEDLVSYGTGLEPLE	0.999997
Q9UKJ3	G patch domain-containing protein 8	GPATCH8	S	738	APADSERGPKPEPPGSGSPAPPRRRRRAQDD	0.761747
Q9UKJ3	G patch domain-containing protein 8	GPATCH8	S	740	ADSERGPKPEPPGSGSPAPPRRRRRAQDDSQ	0.990268
Q9UKJ3	G patch domain-containing protein 8	GPATCH8	S	653	ACSGLNKQEPGGSHGSETEDTGRSLPSKKER	0.805196
Q9UKJ3	G patch domain-containing protein 8	GPATCH8	S	1107	LLLEKIQSRKVERKPSVSEEVQATPNKAGPK	0.999955
Q9HC44	Vasculin-like protein 1	GPBP1L1	S	49	PRGEGRFGVSRRRHNSSDGFFNNGPLRTAGD	0.99913
Q9HC44	Vasculin-like protein 1	GPBP1L1	S	21	FVPAWLNFSTPQSAKSPTATFEKHGEHLPRG	0.840795
Q9HC44	Vasculin-like protein 1	GPBP1L1	T	354	ENRDCDKLEDLEDNSTPEPKENGEEGCHQNG	0.826687
Q9NQX3	Gephyrin;Molybdopterin adenylyltransferase;Molybdopterin molybdenumtransferase	GPHN	S	188	IVKVKEVHDELEDLPSPPPPLSPPPTTSPHK	0.999921
Q9NQX3	Gephyrin;Molybdopterin adenylyltransferase;Molybdopterin molybdenumtransferase	GPHN	S	194	VHDELEDLPSPPPPLSPPPTTSPHKQTEDKG	0.846578
Q92917	G patch domain and KOW motifs-containing protein	GPKOW	S	42	SARRRLADSGDGAGPSPEEKDFLKTVEGREL	1
Q92917	G patch domain and KOW motifs-containing protein	GPKOW	T	216	KGLGLGANLTEAQALTPTGPSRMPRPDEEQE	0.990039
P32249	G-protein coupled receptor 183	GPR183	S	328	KGYKRKVMRMLKRQVSVSISSAVKSAPEENS	0.995026
P32249	G-protein coupled receptor 183	GPR183	S	330	YKRKVMRMLKRQVSVSISSAVKSAPEENSRE	0.982592
Q9Y2T5	Probable G-protein coupled receptor 52	GPR52	S	22	TEWRILNMSSGIVNVSERHSCPLGFGHYSVV	0.998443
Q9Y4H4	G-protein-signaling modulator 3	GPSM3	S	35	EEGWPPPNSTTRPWRSAPPSPPPPGTRHTAL	0.999973
Q9Y4H4	G-protein-signaling modulator 3	GPSM3	S	39	PPPNSTTRPWRSAPPSPPPPGTRHTALGPRS	0.994143
Q3KR37-3	GRAM domain-containing protein 1B	GRAMD1B	S	4	____________MPTSSAVLLRVLSIPLLTV	0.86946
Q3KR37-3	GRAM domain-containing protein 1B	GRAMD1B	S	5	___________MPTSSAVLLRVLSIPLLTVL	0.86946
Q8IYS0	GRAM domain-containing protein 1C	GRAMD1C	T	276	SKGGLGKEESQNEKQTKKSLLPTLEKKLTRV	0.99847
Q13322	Growth factor receptor-bound protein 10	GRB10	S	104	QPRASGPPRSIQPQVSPRQRVQRSQPVHILA	0.999998
Q4V328	GRIP1-associated protein 1	GRIPAP1	S	241	EELAKLSEKLKKKQESFCRLQTEKETLFNDS	0.997154
P43250-2	G protein-coupled receptor kinase 6;G protein-coupled receptor kinase 5	GRK6;GRK5	S	484	PQAIYCKDVLDIEQFSTVKGVELEPTDQDFY	0.888557
Q14687	Genetic suppressor element 1	GSE1	S	826	VAQKRRKRRRMLRERSPSPPTIQSKRQTPSP	0.999996
Q14687	Genetic suppressor element 1	GSE1	S	828	QKRRKRRRMLRERSPSPPTIQSKRQTPSPRL	0.999017
Q8IYD1	Eukaryotic peptide chain release factor GTP-binding subunit ERF3B	GSPT2	S	189	ESGQEMMEEKEEIRKSKSVIVPSGAPKKEHV	1
Q8IYD1	Eukaryotic peptide chain release factor GTP-binding subunit ERF3B	GSPT2	S	191	GQEMMEEKEEIRKSKSVIVPSGAPKKEHVNV	1
Q8IYD1	Eukaryotic peptide chain release factor GTP-binding subunit ERF3B	GSPT2	S	196	EEKEEIRKSKSVIVPSGAPKKEHVNVVFIGH	1
P78417	Glutathione S-transferase omega-1	GSTO1	S	5	___________MSGESARSLGKGSAPPGPVP	0.91661
P35269	General transcription factor IIF subunit 1	GTF2F1	T	331	PPEEDKEEEEEKKAPTPQEKKRRKDSSEESD	1
P78347	General transcription factor II-I	GTF2I	S	823	PEMFETAIKESTSSKSPPRKINSSPNVNTTA	0.999517
P78347	General transcription factor II-I	GTF2I	S	674	SKINTKALQSPKRPRSPGSNSKVPEIEVTVE	0.998212
P78347	General transcription factor II-I	GTF2I	S	412	LYVEGLPEGIPFRRPSTYGIPRLERILLAKE	0.97093
Q92664	Transcription factor IIIA	GTF3A	S	175	PLFKCTQEGCGKHFASPSKLKRHAKAHEGYV	0.997461
Q12789	General transcription factor 3C polypeptide 1	GTF3C1	S	1068	VRCPRVRKNSSTDQGSDEEGSLQKEQESAMD	0.99999
Q12789	General transcription factor 3C polypeptide 1	GTF3C1	S	667	TKCCKKSIVRLVRNLSEEGLLRLYRTTVIQD	1
Q12789	General transcription factor 3C polypeptide 1	GTF3C1	S	1865	QAPPSHSPRGTKRRASWASENGETDAEGTQM	0.999457
Q12789	General transcription factor 3C polypeptide 1	GTF3C1	S	739	KTSQPPVPQGEAEEDSQGKEGPSGSGDSQLS	1
Q12789	General transcription factor 3C polypeptide 1	GTF3C1	S	1062	NTPLGVVRCPRVRKNSSTDQGSDEEGSLQKE	0.9971
Q12789	General transcription factor 3C polypeptide 1	GTF3C1	S	1068	VRCPRVRKNSSTDQGSDEEGSLQKEQESAMD	0.99999
Q8WUA4	General transcription factor 3C polypeptide 2	GTF3C2	S	893	QLESRAHFNAMFQPSSPTRRPGFSPTSHRLL	0.963638
Q8WUA4	General transcription factor 3C polypeptide 2	GTF3C2	S	167	LLLKLSKDLDRPESQSPKRPPEDFETPSGER	0.99962
Q8WUA4	General transcription factor 3C polypeptide 2	GTF3C2	S	901	NAMFQPSSPTRRPGFSPTSHRLLPTP_____	0.976861
Q9Y5Q9	General transcription factor 3C polypeptide 3	GTF3C3	S	43	RKTREKKSLQEKGKLSAEENPDDSEVPSSSG	0.992516
Q9UKN8	General transcription factor 3C polypeptide 4	GTF3C4	S	611	LWKPTHEDSKILLVDSPGMGNADDEQQEEGT	1
Q9NYZ3	G2 and S phase-expressed protein 1	GTSE1	S	243	SIPGAAEKPKKEIPASPSRTKIPAEKESHRD	0.926607
Q9NYZ3	G2 and S phase-expressed protein 1	GTSE1	S	715	PLIQLSPEADKENVDSPLLKF__________	1
Q9H116	GDNF-inducible zinc finger protein 1	GZF1	S	613	DKNTPWKSFLVIVDGSPKNDDGHKTEQPDEE	1
Q92522	Histone H1x	H1FX	S	31	GMAKKVTKAGGSAALSPSKKRKNSKKKNQPG	0.999865
Q92522	Histone H1x	H1FX	S	2	______________MSVELEEALPVTTAEGM	0.999558
O75367	Core histone macro-H2A.1	H2AFY	T	178	GEVSKAASADSTTEGTPADGFTVLSTKSLFL	0.99988
O75367	Core histone macro-H2A.1;Histone H2A	H2AFY	T	129	LAKKRGSKGKLEAIITPPPAKKAKSPSQKKP	1
P68431	Histone H3;Histone H3.1;Histone H3.2;Histone H3.3;Histone H3.3C;Histone H3.1t	H3F3B;H3F3A;HIST1H3A;HIST2H3A;H3F3C;HIST3H3;HIST2H3PS2	S	58	RPGTVALREIRRYQKSTELLIRKLPFQRLMR;RPGTVALREIRRYQKSTELLIRKLPFQRLVR	0.943681
P68431	Histone H3;Histone H3.1;Histone H3.2;Histone H3.3;Histone H3.3C;Histone H3.1t	H3F3B;H3F3A;HIST1H3A;HIST2H3A;H3F3C;HIST3H3;HIST2H3PS2	T	46	PATGGVKKPHRYRPGTVALREIRRYQKSTEL;PSTGGVKKPHRYRPGTVALREIRRYQKSTEL	0.999473
Q5JVS0	Intracellular hyaluronan-binding protein 4	HABP4	S	108	KERKSLPAPVAQRPDSPGGGLQAPGQKRTPR	1
Q9P035	Very-long-chain (3R)-3-hydroxyacyl-CoA dehydratase 3	HACD3	S	135	LRAKEEERLNKLRLESEGSPETLTNLRKGYL	0.995617
Q9P035	Very-long-chain (3R)-3-hydroxyacyl-CoA dehydratase 3	HACD3	S	114	RPLFLAPDFDRWLDESDAEMELRAKEEERLN	1
P12081	Histidine--tRNA ligase, cytoplasmic	HARS	S	27	KLQGERVRGLKQQKASAELIEEEVAKLLKLK	1
P49590	Probable histidine--tRNA ligase, mitochondrial	HARS2	S	67	KPNFIIKTPKGTRDLSPQHMVVREKILDLVI	1
Q7Z4H7	HAUS augmin-like complex subunit 6	HAUS6	S	507	NEAISKKIPEFEVENSPLSDVAKNTESSAFG	0.980464
P51610-4	Host cell factor 1;HCF N-terminal chain 1;HCF N-terminal chain 2;HCF N-terminal chain 3;HCF N-terminal chain 4;HCF N-terminal chain 5;HCF N-terminal chain 6;HCF C-terminal chain 1;HCF C-terminal chain 2;HCF C-terminal chain 3;HCF C-terminal chain 4;HCF C-terminal chain 5;HCF C-terminal chain 6	HCFC1	S	6	__________MASAVSPANLPAVLLQPRWKR	1
P51610-4	Host cell factor 1;HCF N-terminal chain 1;HCF N-terminal chain 2;HCF N-terminal chain 3;HCF N-terminal chain 4;HCF N-terminal chain 5;HCF N-terminal chain 6;HCF C-terminal chain 1;HCF C-terminal chain 2;HCF C-terminal chain 3;HCF C-terminal chain 4;HCF C-terminal chain 5;HCF C-terminal chain 6	HCFC1	S	2064	KDSSGTKPANKRPMSSPEMKSAPKKSKADGQ	0.89159
P51610-4	Host cell factor 1;HCF N-terminal chain 1;HCF N-terminal chain 2;HCF N-terminal chain 3;HCF N-terminal chain 4;HCF N-terminal chain 5;HCF N-terminal chain 6;HCF C-terminal chain 1;HCF C-terminal chain 2;HCF C-terminal chain 3;HCF C-terminal chain 4;HCF C-terminal chain 5;HCF C-terminal chain 6	HCFC1	S	666	TTVVGGVTKTITLVKSPISVPGGSALISNLG	0.999977
P51610-4	Host cell factor 1;HCF N-terminal chain 1;HCF N-terminal chain 2;HCF N-terminal chain 3;HCF N-terminal chain 4;HCF N-terminal chain 5;HCF N-terminal chain 6;HCF C-terminal chain 1;HCF C-terminal chain 2;HCF C-terminal chain 3;HCF C-terminal chain 4;HCF C-terminal chain 5;HCF C-terminal chain 6	HCFC1	S	598	TPGTTTLPATVKVASSPVMVSNPATRMLKTA	0.844325
P51610-4	Host cell factor 1;HCF N-terminal chain 1;HCF N-terminal chain 2;HCF N-terminal chain 3;HCF N-terminal chain 4;HCF N-terminal chain 5;HCF N-terminal chain 6;HCF C-terminal chain 1;HCF C-terminal chain 2;HCF C-terminal chain 3;HCF C-terminal chain 4;HCF C-terminal chain 5;HCF C-terminal chain 6	HCFC1	S	411	QLQKYDIPATAATATSPTPNPVPSVPANPPK	0.986216
P51610	Host cell factor 1;HCF N-terminal chain 1;HCF N-terminal chain 2;HCF N-terminal chain 3;HCF N-terminal chain 4;HCF N-terminal chain 5;HCF N-terminal chain 6;HCF C-terminal chain 1;HCF C-terminal chain 2;HCF C-terminal chain 3;HCF C-terminal chain 4;HCF C-terminal chain 5;HCF C-terminal chain 6	HCFC1	S	1507	PVPGPSVPPPEELQVSPGPRQQLPPRQLLQS	0.998071
P14317	Hematopoietic lineage cell-specific protein	HCLS1	S	275	QVARRQQERKAVTKRSPEAPQPVIAMEEPAV	1
Q13547	Histone deacetylase 1	HDAC1	S	393	GVQMQAIPEDAIPEESGDEDEDDPDKRISIC	1
Q92769	Histone deacetylase 2	HDAC2	S	394	GVQMQAIPEDAVHEDSGDEDGEDPDKRISIR	1
P56524	Histone deacetylase 4;Histone deacetylase 9;Histone deacetylase 5	HDAC4;HDAC9;HDAC5	S	246	GMYDAKDDFPLRKTASEPNLKLRSRLKQKVA;GPYDSRDDFPLRKTASEPNLKVRSRLKQKVA	0.999996
Q8WUI4	Histone deacetylase 7;Histone deacetylase	HDAC7	S	486	LPLAQGGHRPLSRAQSSPAAPASLSAPEPAS	0.990207
Q8WUI4	Histone deacetylase 7;Histone deacetylase	HDAC7	S	155	LPSDPPEHFPLRKTVSEPNLKLRYKPKKSLE	0.999641
P51858	Hepatoma-derived growth factor	HDGF	S	165	EKGALKRRAGDLLEDSPKRPKEAENPEGEEK	1
P51858	Hepatoma-derived growth factor	HDGF	S	239	ATKEDAEAPGIRDHESL______________	1
P51858	Hepatoma-derived growth factor	HDGF	S	132	EAAEGDGDKKGNAEGSSDEEGKLVIDEPAKE	1
P51858	Hepatoma-derived growth factor	HDGF	S	133	AAEGDGDKKGNAEGSSDEEGKLVIDEPAKEK	1
P51858	Hepatoma-derived growth factor	HDGF	S	107	NPTVKASGYQSSQKKSCVEEPEPEPEAAEGD	1
P51858	Hepatoma-derived growth factor	HDGF	S	132	EAAEGDGDKKGNAEGSSDEEGKLVIDEPAKE	1
P51858	Hepatoma-derived growth factor	HDGF	S	133	AAEGDGDKKGNAEGSSDEEGKLVIDEPAKEK	1
Q7Z4V5	Hepatoma-derived growth factor-related protein 2	HDGFRP2	S	652	LHDSVREGPDLDRPGSDRQERERARGDSEAL	1
Q7Z4V5	Hepatoma-derived growth factor-related protein 2	HDGFRP2	S	625	KGESAEDKEHEEGRDSEEGPRCGSSEDLHDS	1
Q7Z4V5	Hepatoma-derived growth factor-related protein 2	HDGFRP2	S	454	KQQAKPVKVERTRKRSEGFSMDRKVEKKKEP	0.999916
Q7Z4V5	Hepatoma-derived growth factor-related protein 2	HDGFRP2	S	232	RGPLGGRKKKKAPSASDSDSKADSDGAKPEP	0.999729
Q7Z4V5	Hepatoma-derived growth factor-related protein 2	HDGFRP2	S	234	PLGGRKKKKAPSASDSDSKADSDGAKPEPVA	0.985278
Q00341	Vigilin	HDLBP	S	31	RSGLVPQQIKVATLNSEEESDPPTYKDAFPP	1
Q9H583	HEAT repeat-containing protein 1;HEAT repeat-containing protein 1, N-terminally processed	HEATR1	S	516	HLKKIMKTSKEGVDESFIKEAVLARLGDDNI	1
Q9P2D3	HEAT repeat-containing protein 5B	HEATR5B	S	1737	ILVRHMPHLSTKVSDSPSHIATKTRLSEESA	0.999775
Q6AI08	HEAT repeat-containing protein 6	HEATR6	S	643	KKAPAGPSLEETSVSSPKGSSEPCWLIRLCI	0.977009
Q9Y5Z4	Heme-binding protein 2	HEBP2	T	22	PDPGAAEDAAAQAVETPGWKAPEDAGPQPGS	1
Q9ULT8	E3 ubiquitin-protein ligase HECTD1	HECTD1	S	357	SAGSTGRIPGLRRLDSSGERSHRQLIDCIRS	0.949361
Q9ULT8	E3 ubiquitin-protein ligase HECTD1	HECTD1	S	632	RLGVISKVSTLAGPSSDDENEEESKPEKEDE	0.817482
Q9NRZ9-2	Lymphoid-specific helicase	HELLS	S	487	IANMFGSSEKETIELSPTGRPKRRTRKSINY	0.983384
Q68CP4	Heparan-alpha-glucosaminide N-acetyltransferase	HGSNAT	S	243	ISSRETDRLINSELGSPSRTDPLDGDVQPAT	0.874739
P54198	Protein HIRA	HIRA	S	661	PRKDSRLMPVSLSVQSPAALTAEKEAMCLSA	0.988781
Q9BW71	HIRA-interacting protein 3	HIRIP3	S	223	AKKVEGNKGTKSLKESEQESEEEILAQKKEQ	1
Q9BW71	HIRA-interacting protein 3	HIRIP3	S	227	EGNKGTKSLKESEQESEEEILAQKKEQREEE	1
Q9BW71	HIRA-interacting protein 3	HIRIP3	S	125	DYFGPPAKNGVAAEVSPAKEENPRRASKAVE	1
Q9BW71	HIRA-interacting protein 3	HIRIP3	S	196	APGKASVSRKQAREESEESEAEPVQRTAKKV	1
Q9BW71	HIRA-interacting protein 3	HIRIP3	S	289	RSCKQKSQAKRLLGDSDSEEEQKEAASSGDD	1
Q9BW71	HIRA-interacting protein 3	HIRIP3	S	291	CKQKSQAKRLLGDSDSEEEQKEAASSGDDSG	1
Q9BW71	HIRA-interacting protein 3	HIRIP3	S	223	AKKVEGNKGTKSLKESEQESEEEILAQKKEQ	1
Q9BW71	HIRA-interacting protein 3	HIRIP3	S	227	EGNKGTKSLKESEQESEEEILAQKKEQREEE	1
Q9BW71	HIRA-interacting protein 3	HIRIP3	S	196	APGKASVSRKQAREESEESEAEPVQRTAKKV	1
Q9BW71	HIRA-interacting protein 3	HIRIP3	S	199	KASVSRKQAREESEESEAEPVQRTAKKVEGN	1
Q9BW71	HIRA-interacting protein 3	HIRIP3	S	289	RSCKQKSQAKRLLGDSDSEEEQKEAASSGDD	1
Q9BW71	HIRA-interacting protein 3	HIRIP3	S	291	CKQKSQAKRLLGDSDSEEEQKEAASSGDDSG	1
Q9BW71	HIRA-interacting protein 3	HIRIP3	S	332	SEDRTQLKGGKRLSGSSEDEEDSGKGEPTAK	0.967853
Q9BW71	HIRA-interacting protein 3	HIRIP3	S	333	EDRTQLKGGKRLSGSSEDEEDSGKGEPTAKG	0.997935
P16401	Histone H1.5	HIST1H1B	S	2	______________MSETAPAETATPAPVEK	0.854462
P16403	Histone H1.2	HIST1H1C	S	36	KKKAAKKAGGTPRKASGPPVSELITKAVAAS	0.999988
P16403	Histone H1.2	HIST1H1C	S	2	______________MSETAPAAPAAAPPAEK	0.984515
P16403	Histone H1.2	HIST1H1C	T	146	PVGAAKKPKKAAGGATPKKSAKKTPKKAKKP	1
P16403	Histone H1.2	HIST1H1C	T	45	GTPRKASGPPVSELITKAVAASKERSGVSLA	0.999874
P16402	Histone H1.3	HIST1H1D	S	2	______________MSETAPLAPTIPAPAEK	0.884125
P16402	Histone H1.3	HIST1H1D	T	18	ETAPLAPTIPAPAEKTPVKKKAKKAGATAGK	0.999997
P16402	Histone H1.3	HIST1H1D	T	147	PAGAAKKPKKVAGAATPKKSIKKTPKKVKKP	1
P10412	Histone H1.4	HIST1H1E	S	2	______________MSETAPAAPAAPAPAEK	0.999942
P10412	Histone H1.4	HIST1H1E	T	146	PAGAAKKPKKATGAATPKKSAKKTPKKAKKP	1
P10412	Histone H1.4	HIST1H1E	T	4	____________MSETAPAAPAAPAPAEKTP	0.970034
P10412	Histone H1.4	HIST1H1E	T	18	ETAPAAPAAPAPAEKTPVKKKARKSAGAAKR	1
P10412	Histone H1.4	HIST1H1E	S	2	______________MSETAPAAPAAPAPAEK	0.999942
P10412	Histone H1.4	HIST1H1E	T	18	ETAPAAPAAPAPAEKTPVKKKARKSAGAAKR	1
P16403	Histone H1.4;Histone H1.5;Histone H1.3;Histone H1.2;Histone H1.1;Histone H1t	HIST1H1E;HIST1H1B;HIST1H1D;HIST1H1C;HIST1H1A;HIST1H1T	S	102	LVSKGTLVQTKGTGASGSFKLNKKAASGEAK;LVSKGTLVQTKGTGASGSFKLNKKAASGEGK	0.983104
P16403	Histone H1.4;Histone H1.5;Histone H1.3;Histone H1.2;Histone H1.1;Histone H1t	HIST1H1E;HIST1H1B;HIST1H1D;HIST1H1C;HIST1H1A;HIST1H1T	S	104	SKGTLVQTKGTGASGSFKLNKKAASGEAKPK;SKGTLVQTKGTGASGSFKLNKKAASGEGKPK	0.995401
P16402	Histone H1.4;Histone H1.3	HIST1H1E;HIST1H1D	S	37	KKAKKAGATAGKRKASGPPVSELITKAVAAS;KKKARKSAGAAKRKASGPPVSELITKAVAAS	1
P16402	Histone H1.4;Histone H1.3	HIST1H1E;HIST1H1D	T	46	AAKRKASGPPVSELITKAVAASKERSGVSLA;AGKRKASGPPVSELITKAVAASKERSGVSLA	0.999874
P16403	Histone H1.4;Histone H1.3;Histone H1.2	HIST1H1E;HIST1H1D;HIST1H1C	S	55	VSELITKAVAASKERSGVSLAALKKALAAAG	0.999996
Q93079	Histone H2B type 1-O;Histone H2B type 1-D;Histone H2B type 1-M;Histone H2B type 1-C/E/F/G/I;Histone H2B type 1-K;Histone H2B type F-S;Histone H2B type 1-H;Histone H2B type 2-F;Histone H2B type 1-N;Histone H2B;Histone H2B type 1-L;Histone H2B type 1-A	HIST1H2BO;HIST1H2BD;HIST1H2BM;HIST1H2BC;HIST1H2BK;H2BFS;HIST1H2BH;HIST2H2BF;HIST1H2BN;HIST1H2BL;HIST1H2BA	S	57	VYKVLKQVHPDTGISSKAMGIMNSFVNDIFE	0.969673
P31629	Transcription factor HIVEP2	HIVEP2	S	374	ADDSHTVKQKLALRLSEKKGQDSEPSLNLLS	1
Q8NCD3	Holliday junction recognition protein	HJURP	S	473	LPDSWAMNMYRGGPASPGGLQGLETRRLSLP	1
Q8NCD3	Holliday junction recognition protein	HJURP	S	412	NLDEENRFRTLKWLISPVKIVSRPTIRQGHG	1
P13747	HLA class I histocompatibility antigen, alpha chain E	HLA-E	S	357	SKAEWSDSAQGSESHSL______________	0.79812
P08397	Porphobilinogen deaminase	HMBS	S	15	_MSGNGNAAATAEENSPKMRVIRVGTRKSQL	1
P17096	High mobility group protein HMG-I/HMG-Y	HMGA1	S	103	KKLEKEEEEGISQESSEEEQ___________	0.832189
P17096	High mobility group protein HMG-I/HMG-Y	HMGA1	S	36	TEKRGRGRPRKQPPVSPGTALVGSQKEPSEV	0.999999
P17096	High mobility group protein HMG-I/HMG-Y	HMGA1	S	44	PRKQPPVSPGTALVGSQKEPSEVPTPKRPRG	0.99999
P17096	High mobility group protein HMG-I/HMG-Y	HMGA1	T	53	GTALVGSQKEPSEVPTPKRPRGRPKGSKNKG	0.999978
P17096	High mobility group protein HMG-I/HMG-Y	HMGA1;C2orf81	S	9	_______MSESSSKSSQPLASKQEKDGTEKR	0.978502
P52926	High mobility group protein HMGI-C	HMGA2	S	44	RGRPRKQQQEPTGEPSPKRPRGRPKGSKNKS	0.992149
P09429	High mobility group protein B1;Putative high mobility group protein B1-like 1	HMGB1;HMGB1P1	S	121	CSEYRPKIKGEHPGLSIGDVAKKLGEMWNNT	1
P26583	High mobility group protein B2	HMGB2	S	181	GKSEAGKKGPGRPTGSKKKNEPEDEEEEEEE	0.999905
Q01581	Hydroxymethylglutaryl-CoA synthase, cytoplasmic	HMGCS1	S	516	PRLPATAAEPEAAVISNGEH___________	1
Q01581	Hydroxymethylglutaryl-CoA synthase, cytoplasmic	HMGCS1	S	495	GVGLVHSNIATEHIPSPAKKVPRLPATAAEP	0.999855
P05114	Non-histone chromosomal protein HMG-14	HMGN1	S	86	KEDLPAENGETKTEESPASDEAGEKEAKSD_	0.999999
P05114	Non-histone chromosomal protein HMG-14	HMGN1	S	89	LPAENGETKTEESPASDEAGEKEAKSD____	1
P05114	Non-histone chromosomal protein HMG-14	HMGN1	S	7	_________MPKRKVSSAEGAAKEEPKRRSA	0.981378
P05114	Non-histone chromosomal protein HMG-14	HMGN1	S	8	________MPKRKVSSAEGAAKEEPKRRSAR	0.978827
P05114	Non-histone chromosomal protein HMG-14	HMGN1	S	86	KEDLPAENGETKTEESPASDEAGEKEAKSD_	0.999999
P05114	Non-histone chromosomal protein HMG-14	HMGN1	S	89	LPAENGETKTEESPASDEAGEKEAKSD____	1
Q15651	High mobility group nucleosome-binding domain-containing protein 3	HMGN3	S	93	SENGETKAEEAQKTESVDNEGE_________	0.943401
Q15651	High mobility group nucleosome-binding domain-containing protein 3	HMGN3	S	78	KKEEKQEAGKEGTAPSENGETKAEEAQKTES	0.999935
Q15651	High mobility group nucleosome-binding domain-containing protein 3	HMGN3	S	6	__________MPKRKSPENTEGKDGSKVTKQ	1
P82970	High mobility group nucleosome-binding domain-containing protein 5	HMGN5	S	93	ENAKNGEAKITEAPASEKEIVEVKEENIEDA	1
Q9UGU5	HMG domain-containing protein 4	HMGXB4	S	497	SEGSMKVKASSVGVLSPQKKSPPTTMLLPAS	1
Q9UGU5	HMG domain-containing protein 4	HMGXB4	S	502	KVKASSVGVLSPQKKSPPTTMLLPASPAKAP	0.999985
Q9UGU5	HMG domain-containing protein 4	HMGXB4	S	512	SPQKKSPPTTMLLPASPAKAPETEPIDVAAH	1
Q9UGU5	HMG domain-containing protein 4	HMGXB4	S	502	KVKASSVGVLSPQKKSPPTTMLLPASPAKAP	0.999985
Q9UGU5	HMG domain-containing protein 4	HMGXB4	S	512	SPQKKSPPTTMLLPASPAKAPETEPIDVAAH	1
Q92619	Minor histocompatibility protein HA-1;Minor histocompatibility antigen HA-1	HMHA1	S	73	ATGTLKRPTSLSRHASAAGFPLSGAASWTLG	0.999987
Q92619	Minor histocompatibility protein HA-1;Minor histocompatibility antigen HA-1	HMHA1	S	23	ELMKTPSISKKNRAGSPSPQPSGELPRKDGA	0.999997
Q92619	Minor histocompatibility protein HA-1;Minor histocompatibility antigen HA-1	HMHA1	S	99	SWTLGRSHRSPLTAASPGELPTEGAGPDVVE	0.999994
Q92619	Minor histocompatibility protein HA-1;Minor histocompatibility antigen HA-1	HMHA1	S	23	ELMKTPSISKKNRAGSPSPQPSGELPRKDGA	0.999997
Q92619	Minor histocompatibility protein HA-1;Minor histocompatibility antigen HA-1	HMHA1	S	25	MKTPSISKKNRAGSPSPQPSGELPRKDGADA	0.999952
Q92619	Minor histocompatibility protein HA-1;Minor histocompatibility antigen HA-1	HMHA1	S	93	PLSGAASWTLGRSHRSPLTAASPGELPTEGA	0.999977
Q92619	Minor histocompatibility protein HA-1;Minor histocompatibility antigen HA-1	HMHA1	S	99	SWTLGRSHRSPLTAASPGELPTEGAGPDVVE	0.999994
Q9UK76	Hematological and neurological expressed 1 protein;Hematological and neurological expressed 1 protein, N-terminally processed	HN1	S	87	GGREDLESSGLQRRNSSEASSGDFLDLKGEG	0.94549
Q9UK76	Hematological and neurological expressed 1 protein;Hematological and neurological expressed 1 protein, N-terminally processed	HN1	T	54	EQPVRKNKMASNIFGTPEENQASWAKSAGAK	0.999993
Q9H910	Hematological and neurological expressed 1-like protein	HN1L	S	69	PQNIPKRTNPPGGKGSGIFDESTPVQTRQHL	0.999992
P09651	Heterogeneous nuclear ribonucleoprotein A1;Heterogeneous nuclear ribonucleoprotein A1, N-terminally processed	HNRNPA1	S	6	__________MSKSESPKEPEQLRKLFIGGL	1
P09651	Heterogeneous nuclear ribonucleoprotein A1;Heterogeneous nuclear ribonucleoprotein A1, N-terminally processed	HNRNPA1	S	4	____________MSKSESPKEPEQLRKLFIG	1
P09651	Heterogeneous nuclear ribonucleoprotein A1;Heterogeneous nuclear ribonucleoprotein A1, N-terminally processed	HNRNPA1	S	6	__________MSKSESPKEPEQLRKLFIGGL	1
P09651	Heterogeneous nuclear ribonucleoprotein A1;Heterogeneous nuclear ribonucleoprotein A1, N-terminally processed	HNRNPA1	S	2	______________MSKSESPKEPEQLRKLF	1
P09651	Heterogeneous nuclear ribonucleoprotein A1;Heterogeneous nuclear ribonucleoprotein A1, N-terminally processed;Heterogeneous nuclear ribonucleoprotein A1-like 2	HNRNPA1;HNRNPA1L2	S	142	___KIEVIEIMTDRGSGKKRGFAFVTFDDHD;QYGKIEVIEIMTDRGSGKKRGFAFVTFDDHD	0.955271
P09651	Heterogeneous nuclear ribonucleoprotein A1;Heterogeneous nuclear ribonucleoprotein A1, N-terminally processed;Heterogeneous nuclear ribonucleoprotein A1-like 2	HNRNPA1;HNRNPA1L2	S	95	DGRVVEPKRAVSREDSQRPGAHLTVKKIFVG	0.998935
P22626	Heterogeneous nuclear ribonucleoproteins A2/B1	HNRNPA2B1	S	149	EYGKIDTIEIITDRQSGKKRGFGFVTFDDHD	0.947548
P51991	Heterogeneous nuclear ribonucleoprotein A3	HNRNPA3	S	14	__MEVKPPPGRPQPDSGRRRRRRGEEGHDPK	1
P07910-2	Heterogeneous nuclear ribonucleoproteins C1/C2	HNRNPC	S	220	EKEQSKQAVEMKNDKSEEEQSSSSVKKDETN	1
P07910-2	Heterogeneous nuclear ribonucleoproteins C1/C2	HNRNPC	S	225	KQAVEMKNDKSEEEQSSSSVKKDETNVKMES	0.999298
P07910-2	Heterogeneous nuclear ribonucleoproteins C1/C2	HNRNPC	S	228	VEMKNDKSEEEQSSSSVKKDETNVKMESEGG	0.989484
P07910-2	Heterogeneous nuclear ribonucleoproteins C1/C2	HNRNPC	S	220	EKEQSKQAVEMKNDKSEEEQSSSSVKKDETN	1
P07910-2	Heterogeneous nuclear ribonucleoproteins C1/C2	HNRNPC	S	225	KQAVEMKNDKSEEEQSSSSVKKDETNVKMES	0.999298
P07910-2	Heterogeneous nuclear ribonucleoproteins C1/C2	HNRNPC	S	228	VEMKNDKSEEEQSSSSVKKDETNVKMESEGG	0.989484
P07910-2	Heterogeneous nuclear ribonucleoprotein C-like 1;Heterogeneous nuclear ribonucleoprotein C-like 3;Heterogeneous nuclear ribonucleoprotein C-like 4;Heterogeneous nuclear ribonucleoprotein C-like 2;Heterogeneous nuclear ribonucleoproteins C1/C2	HNRNPCL1;HNRNPCL3;HNRNPCL4;HNRNPC;HNRNPCL2	S	196	QAIKKELTQIKQKVDSLLENLEKIEKEQSKQ;QAIKQELTQIKQKVDSLLENLEKIEKEQSKQ	1
Q14103	Heterogeneous nuclear ribonucleoprotein D0	HNRNPD	S	83	IDASKNEEDEGHSNSSPRHSEAATAQREEWK	0.885844
Q14103	Heterogeneous nuclear ribonucleoprotein D0	HNRNPD	S	190	MKTKEPVKKIFVGGLSPDTPEEKIREYFGGF	0.999916
Q14103	Heterogeneous nuclear ribonucleoprotein D0	HNRNPD	T	193	KEPVKKIFVGGLSPDTPEEKIREYFGGFGEV	0.999993
P52597	Heterogeneous nuclear ribonucleoprotein F;Heterogeneous nuclear ribonucleoprotein F, N-terminally processed	HNRNPF	S	161	DPEGKITGEAFVQFASQELAEKALGKHKERI	1
P31943	Heterogeneous nuclear ribonucleoprotein H;Heterogeneous nuclear ribonucleoprotein H, N-terminally processed;Heterogeneous nuclear ribonucleoprotein H2	HNRNPH1;HNRNPH2	S	104	NNVEMDWVLKHTGPNSPDTANDGFVRLRGLP;NSVEMDWVLKHTGPNSPDTANDGFVRLRGLP	1
P61978-3	Heterogeneous nuclear ribonucleoprotein K	HNRNPK	S	260	GGRPMPPSRRDYDDMSPRRGPPPPPPGRGGR	1
P61978-3	Heterogeneous nuclear ribonucleoprotein K	HNRNPK	S	355	QGGSGYDYSYAGGRGSYGDLGGPIITTQVTI	1
P61978-3	Heterogeneous nuclear ribonucleoprotein K	HNRNPK	S	192	RVVECIKIILDLISESPIKGRAQPYDPNFYD	1
P14866	Heterogeneous nuclear ribonucleoprotein L	HNRNPL	S	185	FVNYSTSQKISRPGDSDDSRSVNSVLLFTIL	0.999683
P52272-2	Heterogeneous nuclear ribonucleoprotein M	HNRNPM	S	536	ANNLERMGLERMGANSLERMGLERMGANSLE	1
P52272-2	Heterogeneous nuclear ribonucleoprotein M	HNRNPM	S	393	ERMGAGLGHGMDRVGSEIERMGLVMDRMGSV	1
P52272-2	Heterogeneous nuclear ribonucleoprotein M	HNRNPM	S	29	TEIKMEEESGAPGVPSGNGAPGPKGEGERPA	1
P52272-2	Heterogeneous nuclear ribonucleoprotein M	HNRNPM	S	358	RGEIIAKQGGGGGGGSVPGIERMGPG_____;RGEIIAKQGGGGGGGSVPGIERMGPGIDRLG	1
P52272-2	Heterogeneous nuclear ribonucleoprotein M	HNRNPM	S	662	MENGKSKGCGVVKFESPEVAERACRMMNGMK	1
P52272-2	Heterogeneous nuclear ribonucleoprotein M	HNRNPM	S	594	SFDRAIEMERGNFGGSFAGSFGGAGGHAPGV	0.999873
P52272-2	Heterogeneous nuclear ribonucleoprotein M	HNRNPM	S	579	GIERMGLAMGGGGGASFDRAIEMERGNFGGS	1
O60506	Heterogeneous nuclear ribonucleoprotein R;Heterogeneous nuclear ribonucleoprotein Q	HNRNPR;SYNCRIP	S	249	IGVCISVANNRLFVGSIPKSKTKEQILEEFS;LGVCISVANNRLFVGSIPKNKTKENILEEFS	1
Q00839	Heterogeneous nuclear ribonucleoprotein U	HNRNPU	S	3	_____________MSSSPVNVKKLKVSELKE	0.818057
Q00839	Heterogeneous nuclear ribonucleoprotein U	HNRNPU	S	4	____________MSSSPVNVKKLKVSELKEE	0.999994
Q1KMD3	Heterogeneous nuclear ribonucleoprotein U-like protein 2	HNRNPUL2;HNRNPUL2-BSCL2	S	185	VPGDKAAEEQGDDQDSEKSKPAGSDGERRGV	1
Q1KMD3	Heterogeneous nuclear ribonucleoprotein U-like protein 2	HNRNPUL2;HNRNPUL2-BSCL2	S	597	DDVPESIMLEMKANFSLPEKCDYMDEVTYGE	1
Q1KMD3	Heterogeneous nuclear ribonucleoprotein U-like protein 2	HNRNPUL2;HNRNPUL2-BSCL2	S	161	EQGLGKREEDEPEERSGDETPGSEVPGDKAA	0.999999
Q1KMD3	Heterogeneous nuclear ribonucleoprotein U-like protein 2	HNRNPUL2;HNRNPUL2-BSCL2	S	193	EQGDDQDSEKSKPAGSDGERRGVKRQRDEKD	0.987851
Q1KMD3	Heterogeneous nuclear ribonucleoprotein U-like protein 2	HNRNPUL2;HNRNPUL2-BSCL2	S	228	AYYEFREEAYHSRSKSPLPPEEEAKDEEEDQ	1
Q9NSC5	Homer protein homolog 3	HOMER3	S	256	EVTPTGEKEGLGQGQSLEQLEALVQTKDQEI	1
Q5SSJ5	Heterochromatin protein 1-binding protein 3	HP1BP3	S	249	SRKTPQKSRNRKNRSSAVDPEPQVKLEDVLP	0.785885
Q5SSJ5	Heterochromatin protein 1-binding protein 3	HP1BP3	S	156	ASQLARAQKQTPMASSPRPKMDAILTEAIKA	0.903485
Q969F9	Hermansky-Pudlak syndrome 3 protein	HPS3	S	462	LLTKAEPEAIPERRQSPKRLLSRKDTSVKIK	1
Q9UPZ3	Hermansky-Pudlak syndrome 5 protein	HPS5	S	602	TCPKEEDTEEEKEVTSPPPEEDRFQELKVAT	0.84638
Q9UPZ3	Hermansky-Pudlak syndrome 5 protein	HPS5	S	695	KKGILDEDNEKEKRDSLGNEESVDKTACECV	0.999999
Q53T59	HCLS1-binding protein 3	HS1BP3	S	194	EGPPVQSLKGEDAEESLEEEEALDPLGIMRS	0.999009
Q53T59	HCLS1-binding protein 3	HS1BP3	S	249	EVDPDEGLFGPGRKLSPQDPSEDVSSVDPLK	1
Q96JZ2	Hematopoietic SH2 domain-containing protein	HSH2D	S	194	NRITTKEATSSCPPKSPLGETRQKLWRSLKM	1
Q96JZ2	Hematopoietic SH2 domain-containing protein	HSH2D	S	276	GDRGYTDPCVATSLKSPSQPQAPKDRKVPTR	0.995431
P07900	Heat shock protein HSP 90-alpha	HSP90AA1	S	231	YPITLFVEKERDKEVSDDEAEEKEDKEEEKE	1
P07900	Heat shock protein HSP 90-alpha	HSP90AA1	S	252	EKEDKEEEKEKEEKESEDKPEIEDVGSDEEE	0.891268
P07900	Heat shock protein HSP 90-alpha	HSP90AA1	S	263	EEKESEDKPEIEDVGSDEEEEKKDGDKKKKK	1
P08238	Heat shock protein HSP 90-alpha;Heat shock protein HSP 90-beta;Heat shock protein HSP 90-alpha A2;Putative heat shock protein HSP 90-beta 2	HSP90AA1;HSP90AB1;HSP90AA2P;HSP90AB2P	T	104	TGIGMTKADLINNLGTIAKFQDQTEYLEEMQ;TGIGMTKADLINNLGTIAKSGTKAFMEALQA	1
P08238	Heat shock protein HSP 90-beta	HSP90AB1	S	445	YEAFSKNLKLGIHEDSTNRRRLSELLRYHTS	0.922062
P08238	Heat shock protein HSP 90-beta	HSP90AB1	S	365	KNNIKLYVRRVFIMDSCDELIPEYLNFIRGV	0.906246
P08238	Heat shock protein HSP 90-beta;Putative heat shock protein HSP 90-beta 2	HSP90AB1;HSP90AB2P	S	255	EDKDDEEKPKIEDVGSDEEDDSGKDKKKKTK;ENKDDEEKPKIEDVGSDEEDDSGKDKKKKTK	1
P08238	Heat shock protein HSP 90-beta;Putative heat shock protein HSP 90-beta-3	HSP90AB1;HSP90AB3P	S	226	YPITLYLEKEREKEISDDEAEEEKGEKEEED	1
P14625	Endoplasmin	HSP90B1	S	306	EPMEEEEAAKEEKEESDDEAAVEEEEEEKKP	1
P14625	Endoplasmin	HSP90B1	S	439	DMMPKYLNFVKGVVDSDDLPLNVSRETLQQH	0.881998
Q0VDF9	Heat shock 70 kDa protein 14	HSPA14	T	142	TAHSVLGSDANDVVITVPFDFGEKQKNALGE	0.937588
P34932	Heat shock 70 kDa protein 4	HSPA4	S	546	VEEQQQQTPAENKAESEEMETSQAGSKDKKM	0.999998
P34932	Heat shock 70 kDa protein 4	HSPA4	S	647	LSGEYEKFVSEDDRNSFTLKLEDTENWLYED	0.999039
P34932	Heat shock 70 kDa protein 4	HSPA4	T	538	QVDQEEPHVEEQQQQTPAENKAESEEMETSQ	1
P11142	Heat shock cognate 71 kDa protein	HSPA8	S	541	KAEDEKQRDKVSSKNSLESYAFNMKATVEDE	0.999921
P04792	Heat shock protein beta-1	HSPB1	S	15	_MTERRVPFSLLRGPSWDPFRDWYPHSRLFD	1
P04792	Heat shock protein beta-1	HSPB1	S	82	AVAAPAYSRALSRQLSSGVSEIRHTADRWRV	0.999997
P10809	60 kDa heat shock protein, mitochondrial	HSPD1	S	70	MGPKGRTVIIEQSWGSPKVTKDGVTVAKSID	1
P10809	60 kDa heat shock protein, mitochondrial	HSPD1	S	410	AKLSDGVAVLKVGGTSDVEVNEKKDRVTDAL	0.91526
Q92598	Heat shock protein 105 kDa	HSPH1	S	809	NTCEPVVTQPKPKIESPKLERTPNGPNIDKK	0.999976
Q92598	Heat shock protein 105 kDa	HSPH1	S	557	PQVQTDAQQTSQSPPSPELTSEENKIPDADK	0.97002
Q92598	Heat shock protein 105 kDa	HSPH1	T	815	VTQPKPKIESPKLERTPNGPNIDKKEEDLED	1
O43719	HIV Tat-specific factor 1	HTATSF1	S	579	EFEENGLEKDLDEEGSEKELHENVLDKELEE	1
O43719	HIV Tat-specific factor 1	HTATSF1	S	529	ENGLAKESEDDLNKESEEEVGPTKESEEDDS	1
O43719	HIV Tat-specific factor 1	HTATSF1	S	498	KESEEGNPVRGSEEDSPKKESKKKTLKNDCE	1
O43719	HIV Tat-specific factor 1	HTATSF1	S	721	LFDEEEDSSEKLFDDSDERGTLGGFGSVEEG	1
O43719	HIV Tat-specific factor 1	HTATSF1	S	713	EDDDSNEKLFDEEEDSSEKLFDDSDERGTLG	1
O43719	HIV Tat-specific factor 1	HTATSF1	S	714	DDDSNEKLFDEEEDSSEKLFDDSDERGTLGG	1
O43719	HIV Tat-specific factor 1	HTATSF1	S	702	KEVEDADEKLFEDDDSNEKLFDEEEDSSEKL	1
O43719	HIV Tat-specific factor 1	HTATSF1	S	676	KKAEEGDADEKLFEESDDKEDEDADGKEVED	1
O43719	HIV Tat-specific factor 1	HTATSF1	S	387	FLNAPEANRGLRRSDSVSASERAGPSRARHF	0.998164
O43719	HIV Tat-specific factor 1	HTATSF1	S	642	KEEEEDTYEKVFDDESDEKEDEEYADEKGLE	1
O43719	HIV Tat-specific factor 1	HTATSF1	S	616	EFEDDGSEKVLDEEGSEREFDEDSDEKEEEE	1
O43719	HIV Tat-specific factor 1	HTATSF1	S	485	GCPKRGFEGSCSQKESEEGNPVRGSEEDSPK	0.938774
O43719	HIV Tat-specific factor 1	HTATSF1	S	494	SCSQKESEEGNPVRGSEEDSPKKESKKKTLK	0.999838
O43719	HIV Tat-specific factor 1	HTATSF1	S	498	KESEEGNPVRGSEEDSPKKESKKKTLKNDCE	1
O43719	HIV Tat-specific factor 1	HTATSF1	S	713	EDDDSNEKLFDEEEDSSEKLFDDSDERGTLG	1
O43719	HIV Tat-specific factor 1	HTATSF1	S	714	DDDSNEKLFDEEEDSSEKLFDDSDERGTLGG	1
P42858	Huntingtin	HTT	S	1199	KGKEKEPGEQASVPLSPKKGSEASAASRQSD	0.999898
P42858	Huntingtin	HTT	S	1874	KRHSLSSTKLLSPQMSGEEEDSDLAAKLGMC	0.999987
Q7Z6Z7	E3 ubiquitin-protein ligase HUWE1	HUWE1	S	2362	ELEDLIDELLERDGGSGNSTIIVSRSGEDES	1
Q7Z6Z7	E3 ubiquitin-protein ligase HUWE1	HUWE1	S	1907	CIRIALPAPRGSGTASDDEFENLRIKGPNAV	0.999876
Q7Z6Z7	E3 ubiquitin-protein ligase HUWE1	HUWE1	T	1722	SKEMDIKRKENKGNDTPLALESTNTEKETSL	1
Q7Z6Z7	E3 ubiquitin-protein ligase HUWE1	HUWE1	S	2362	ELEDLIDELLERDGGSGNSTIIVSRSGEDES	1
Q7Z6Z7	E3 ubiquitin-protein ligase HUWE1	HUWE1	S	2365	DLIDELLERDGGSGNSTIIVSRSGEDESQED	0.878721
P41252	Isoleucine--tRNA ligase, cytoplasmic	IARS	S	1047	FIFTTIKAPLKPYPVSPSDKVLIQEKTQLKG	0.968992
H3BR88		IFI16	S	10	______MSTAMGRSPSPKTSLSAPPNSSSTE	0.939444
Q16666	Gamma-interferon-inducible protein 16	IFI16	S	153	GPKGSKVSEEQTQPPSPAGAGMSTAMGRSPS	0.998562
P17181	Interferon alpha/beta receptor 1	IFNAR1	S	495	EYFSEQPLKNLLLSTSEEQIEKCFIIENIST	0.995463
Q96RY7	Intraflagellar transport protein 140 homolog	IFT140	S	360	RGRVAMWRKVPDFLGSPGAEGKDRWALQTPT	1
Q9NZI8	Insulin-like growth factor 2 mRNA-binding protein 1	IGF2BP1	S	181	GRRGGFGSRGQPRQGSPVAAGAPAKQQQVDI	1
Q9NZI8	Insulin-like growth factor 2 mRNA-binding protein 1	IGF2BP1	T	446	LSRFASASIKIAPPETPDSKVRMVIITGPPE	0.988891
O00425	Insulin-like growth factor 2 mRNA-binding protein 3	IGF2BP3	S	184	RGRRGLGQRGSSRQGSPGSVSKQKPCDLPLR	0.999908
P11717	Cation-independent mannose-6-phosphate receptor	IGF2R	S	2409	KSVKALSSLHGDDQDSEDEVLTIPEVKVHSG	0.999554
P11717	Cation-independent mannose-6-phosphate receptor	IGF2R	S	2484	QKTVSSTKLVSFHDDSDEDLLHI________	1
Q13123	Protein Red	IK	S	417	STKELIKSINEKFAGSAGWEGTESLKKPEDK	0.999999
O14920	Inhibitor of nuclear factor kappa-B kinase subunit beta	IKBKB	Y	571	QGGTLDDLEEQARELYRRLREKPRDQRTEGD	0.999942
Q13422	DNA-binding protein Ikaros	IKZF1	S	442	SLKEEHRAYDLLRAASENSQDALRVVSTSGE	0.999995
Q14005	Pro-interleukin-16;Interleukin-16	IL16	S	922	GSPAASEARDPGVSESPPPGRQPNQKTLPPG	0.999983
Q14005	Pro-interleukin-16;Interleukin-16	IL16	S	845	IRASSSSSSIRQRISSFETFGSSQLPDKGAQ	0.999823
Q8TAD2	Interleukin-17D	IL17D	S	179	PVGCTCVPEPEKDADSINSSIDKQGAKLLLG	1
Q8TAD2	Interleukin-17D	IL17D	S	182	CTCVPEPEKDADSINSSIDKQGAKLLLGPND	1
Q8TAD2	Interleukin-17D	IL17D	S	183	TCVPEPEKDADSINSSIDKQGAKLLLGPNDA	1
Q12906	Interleukin enhancer-binding factor 3	ILF3	S	62	DWIDEQEKGSSEQAESDNMDVPPEDDSKEGA	0.819417
Q12906	Interleukin enhancer-binding factor 3	ILF3	S	382	ITPMKRPMEEDGEEKSPSKKKKKIQKKEEKA	0.999706
Q12906	Interleukin enhancer-binding factor 3	ILF3	S	190	VVREEMEKVLAGETLSVNDPPDVLDRQKCLA	0.83171
Q12906	Interleukin enhancer-binding factor 3	ILF3	S	476	VLQDMGLPTGAEGRDSSKGEDSAEETEAKPA	0.980075
Q12906	Interleukin enhancer-binding factor 3	ILF3	S	477	LQDMGLPTGAEGRDSSKGEDSAEETEAKPAV	0.818411
Q12906	Interleukin enhancer-binding factor 3	ILF3	T	592	KAYAALAALEKLFPDTPLALDANKKKRAPVP	1
Q9H0C8	Integrin-linked kinase-associated serine/threonine phosphatase 2C	ILKAP;ILKAP3;ILKAP2	S	13	___MDLFGDLPEPERSPRPAAGKEAQKGPLL	1
Q16891-2	MICOS complex subunit MIC60	IMMT	S	103	MVLGPAAYNVPLPKKSIQSGPLKISSVSEVM	0.999959
P12268	Inosine-5'-monophosphate dehydrogenase 2	IMPDH2	S	416	FFSDGIRLKKYRGMGSLDAMDKHLSSQNRYF	1
Q9NQS7	Inner centromere protein	INCENP	S	263	VGTGRSASKLRIAQVSPGPRDSPAFPDSPWR	1
Q8WYH8	Inhibitor of growth protein 5	ING5	S	118	DLARFEADLKDKMEGSDFESSGGRGLKKGRG	1
Q8WYH8	Inhibitor of growth protein 5	ING5	S	148	GQKEKRGSRGRGRRTSEEDTPKKKKHKGGSE	0.967802
Q9C086	INO80 complex subunit B	INO80B;INO80B-WBP1	S	351	RINLQMRLGGPEGPGSPLLAT__________	1
Q92835	Phosphatidylinositol 3,4,5-trisphosphate 5-phosphatase 1	INPP5D	S	289	SIEDKVKALLHEGPESPHRPSLIPPVTFEVK	0.977855
Q92835	Phosphatidylinositol 3,4,5-trisphosphate 5-phosphatase 1	INPP5D	S	971	CRGESPPTPPGQPPISPKKFLPSTANRGLPP	1
Q92835	Phosphatidylinositol 3,4,5-trisphosphate 5-phosphatase 1	INPP5D	S	243	LPSLESLQRLFDQQLSPGLRPRPQVPGEANP	1
Q92835	Phosphatidylinositol 3,4,5-trisphosphate 5-phosphatase 1	INPP5D	S	934	GPFGPPMPLHVKQTLSPDQQPTAWSYDQPPK	0.99538
Q92835	Phosphatidylinositol 3,4,5-trisphosphate 5-phosphatase 1	INPP5D	T	1108	EGRAAGGDKSQGKPKTPVSSQAPVPAKRPIK	0.999378
Q92835	Phosphatidylinositol 3,4,5-trisphosphate 5-phosphatase 1	INPP5D	Y	556	HLTSGSEKKLRRNQNYMNILRFLALGDKKLS	1
Q92835	Phosphatidylinositol 3,4,5-trisphosphate 5-phosphatase 1	INPP5D	S	951	DQQPTAWSYDQPPKDSPLGPCRGESPPTPPG	0.763982
Q92835	Phosphatidylinositol 3,4,5-trisphosphate 5-phosphatase 1	INPP5D	S	971	CRGESPPTPPGQPPISPKKFLPSTANRGLPP	1
Q9Y2H2	Phosphatidylinositide phosphatase SAC2	INPP5F	S	123	KKHHFGINKPEKIIPSPDDSKFLLKTFTHIK	0.996466
O15357	Phosphatidylinositol 3,4,5-trisphosphate 5-phosphatase 2	INPPL1	S	132	VEGEREPDPPDDRDASDGEDEKPPLPPRSGS	1
Q8N201	Integrator complex subunit 1	INTS1	S	307	EEDSQTELLIAEEKLSPEQEGQLMPRYEELA	1
Q8N201	Integrator complex subunit 1	INTS1	S	104	LGRLAEAAVAEKRAISPSIKEPSVVPIEVLP	0.999775
Q8N201	Integrator complex subunit 1	INTS1	S	1395	LQQALGQELARVVQGSPEVPGITVRVLQALA	0.999894
Q15051	IQ calmodulin-binding motif-containing protein 1	IQCB1	S	572	LKHIQAPWWKKLGEESGDEIDVPKDELSIEL	1
P46940	Ras GTPase-activating-like protein IQGAP1	IQGAP1	S	330	ALEQGDALALFRALQSPALGLRGLQQQNSDW	1
Q13576	Ras GTPase-activating-like protein IQGAP2	IQGAP2	S	16	MPHEELPSLQRPRYGSIVDDERLSAEEMDER	0.999997
Q9Y616	Interleukin-1 receptor-associated kinase 3	IRAK3	S	110	HRRAIHLITNYGAVLSPSEKSYQEGGFPNIL	0.938812
A0A0A6YY96		IREB2	S	157	APNPGGGDLQKAGKLSPLKVQPKKLPCRGQT	1
Q8IU81	Interferon regulatory factor 2-binding protein 1	IRF2BP1	S	453	KDPGGGGGPVRAGGASPAASSTAQPPTQHRL	0.999584
Q8IU81	Interferon regulatory factor 2-binding protein 1	IRF2BP1	S	384	APSRNLAPTPRRRKASPEPEGEAAGKMTTEE	1
Q8IU81	Interferon regulatory factor 2-binding protein 1	IRF2BP1	S	436	SPIAALKNVAEALGHSPKDPGGGGGPVRAGG	1
Q8IU81	Interferon regulatory factor 2-binding protein 1	IRF2BP1	S	66	AARQLKRSHVLPEGRSPGPPALKHPATKDLA	0.999999
Q7Z5L9-2	Interferon regulatory factor 2-binding protein 2	IRF2BP2	S	175	NGFSKLEEPPELNRQSPNPRRGHAVPPTLVP	1
Q7Z5L9-2	Interferon regulatory factor 2-binding protein 2	IRF2BP2	S	344	NGSKAVARTARKRKPSPEPEGEVGPPKINGE;PALTAVARTARKRKPSPEPEGEVGPPKINGE	1
Q7Z5L9-2	Interferon regulatory factor 2-binding protein 2	IRF2BP2	S	240	GSAQPTDLGAHKRPASVSSSAAVEHEQREAA	0.992221
Q7Z5L9-2	Interferon regulatory factor 2-binding protein 2	IRF2BP2	S	71	ARQLKRAHGCFPEGRSPPGAAASAAAKPPPL	1
Q9H1B7	Interferon regulatory factor 2-binding protein-like	IRF2BPL	S	547	PSGRGAAASLRKRKASPEPPDSAEGALKLGE	1
P35568	Insulin receptor substrate 1	IRS1	S	3	_____________MASPPESDGFSDVRKVGY	0.999993
Q9Y4H2	Insulin receptor substrate 2	IRS2	S	608	ASLDEYTLMRATFSGSAGRLCPSCPASSPKV	0.991636
Q9Y4H2	Insulin receptor substrate 2	IRS2	S	1176	VSPSFAHNPKRHNSASVENVSLRKSSEGGVG	0.976628
Q9Y4H2	Insulin receptor substrate 2	IRS2	S	560	MDRPLSHCGRSYRRVSGDAAQDLDRGLRKRT	1
Q9Y4H2	Insulin receptor substrate 2	IRS2	S	1100	QPIAAPPKPEAARVASPTSGVKRLSLMEQVS	0.99349
Q9H0X4	Protein ITFG3	ITFG3	S	21	DLEAEIHPLKNEERKSQENLGNPSKNEDNVK	1
P08648	Integrin alpha-5;Integrin alpha-5 heavy chain;Integrin alpha-5 light chain	ITGA5	S	1047	YGTAMEKAQLKPPATSDA_____________	0.966036
P23229-2	Integrin alpha-6;Integrin alpha-6 heavy chain;Integrin alpha-6 light chain;Processed integrin alpha-6	ITGA6	S	1064	HYDATYHKAEIHAQPSDKERLTSDA______	1
Q14643	Inositol 1,4,5-trisphosphate receptor type 1	ITPR1	S	1598	AMNWRLSARNAARRDSVLAASRDYRNIIERL	1
Q14571	Inositol 1,4,5-trisphosphate receptor type 2	ITPR2	S	1160	QVKGGEEPIEESNILSPVQDGTKKPQIDSNK	1
Q14573	Inositol 1,4,5-trisphosphate receptor type 3	ITPR3	S	1832	EDREPVDPTTKGRVASFSIPGSSSRYSLGPS	0.999674
Q9NZM3	Intersectin-2	ITSN2	S	889	QKKSAFTRTVSPGSVSPIHGQGQVVENLKAQ	0.876661
Q96ST2	Protein IWS1 homolog	IWS1	S	400	EEEKVAKRKAAVLSDSEDEEKASAKKSRVVS	1
Q96ST2	Protein IWS1 homolog	IWS1	S	511	LEEEKGETQVKEAEDSDSDDNIKRGKHMDFL	1
Q96ST2	Protein IWS1 homolog	IWS1	S	313	RVSDSESEGPQKGPASDSETEDASRHKQKPE	1
Q96ST2	Protein IWS1 homolog	IWS1	S	157	HASDSENEDVGKHPASDSEIEELQKSPASDS	1
Q96ST2	Protein IWS1 homolog	IWS1	S	377	SSDSEEEEHKKQKMDSDEDEKEGEEEKVAKR	1
Q96ST2	Protein IWS1 homolog	IWS1	S	438	DAVSDKSGKREKTIASDSEEEAGKELSDKKN	0.999981
Q96ST2	Protein IWS1 homolog	IWS1	S	440	VSDKSGKREKTIASDSEEEAGKELSDKKNEE	0.999999
Q96ST2	Protein IWS1 homolog	IWS1	S	398	EGEEEKVAKRKAAVLSDSEDEEKASAKKSRV	1
Q96ST2	Protein IWS1 homolog	IWS1	S	400	EEEKVAKRKAAVLSDSEDEEKASAKKSRVVS	1
Q96ST2	Protein IWS1 homolog	IWS1	S	313	RVSDSESEGPQKGPASDSETEDASRHKQKPE	1
Q96ST2	Protein IWS1 homolog	IWS1	S	315	SDSESEGPQKGPASDSETEDASRHKQKPESD	0.996676
Q96ST2	Protein IWS1 homolog	IWS1	S	157	HASDSENEDVGKHPASDSEIEELQKSPASDS	1
Q96ST2	Protein IWS1 homolog	IWS1	S	159	SDSENEDVGKHPASDSEIEELQKSPASDSET	1
Q96ST2	Protein IWS1 homolog	IWS1	S	196	QISDSESEEPPRHQASDSENEEPPKPRMSDS	1
Q96ST2	Protein IWS1 homolog	IWS1	S	198	SDSESEEPPRHQASDSENEEPPKPRMSDSES	1
Q96ST2	Protein IWS1 homolog	IWS1	S	329	DSETEDASRHKQKPESDDDSDRENKGEDTEM	1
Q96ST2	Protein IWS1 homolog	IWS1	S	333	EDASRHKQKPESDDDSDRENKGEDTEMQNDS	1
Q96ST2	Protein IWS1 homolog	IWS1	S	415	SEDEEKASAKKSRVVSDADDSDSDAVSDKSG	0.998734
Q96ST2	Protein IWS1 homolog	IWS1	S	438	DAVSDKSGKREKTIASDSEEEAGKELSDKKN	0.999981
Q96ST2	Protein IWS1 homolog	IWS1	S	440	VSDKSGKREKTIASDSEEEAGKELSDKKNEE	0.999999
Q6IE81	Protein Jade-1	JADE1	S	89	DPWRQEWEKGVQVPVSPGTIPQPVARVVSEE	0.977017
Q6IE81	Protein Jade-1	JADE1	S	603	VHSLKKPHKRDPLQNSPGSEGKTLLKQPDLC	0.99996
Q6IE81	Protein Jade-1	JADE1	S	743	VNYNQTAVKVPTTPASPVKNWGGFRIPKKGE	0.999952
Q92833	Protein Jumonji	JARID2	S	78	LGNDQSKGLGPASEQSENEKDDASQVSSTSN	1
Q15652	Probable JmjC domain-containing histone demethylation protein 2C	JMJD1C	S	652	KSSPSPEVVKPKITHSPDSVKSKATYVNSQA	0.998533
Q15652	Probable JmjC domain-containing histone demethylation protein 2C	JMJD1C	S	617	PLSAVSVMEDKLHKRSPPPETIKSKLNTSVD	0.99999
Q15652	Probable JmjC domain-containing histone demethylation protein 2C	JMJD1C	S	317	QQQQQRSIRPNKRKGSDSSIPDEEKMKEEKY	0.999882
Q9HDC5	Junctophilin-1	JPH1	S	216	AELAGKKKGGLFRRGSLLGSMKLRKSESKSS	0.999956
Q9HDC5	Junctophilin-1	JPH1	T	448	DAKENPEEKVPEKPPTPKESPHFYRKGTTPP	1
Q9HDC5	Junctophilin-1	JPH1	S	465	KESPHFYRKGTTPPRSPEASPKHSHSPASSP	0.998308
Q9HDC5	Junctophilin-1	JPH1	T	461	PPTPKESPHFYRKGTTPPRSPEASPKHSHSP	0.988948
Q9HDC5	Junctophilin-1	JPH1	S	465	KESPHFYRKGTTPPRSPEASPKHSHSPASSP	0.998308
Q9HDC5	Junctophilin-1	JPH1	S	469	HFYRKGTTPPRSPEASPKHSHSPASSPKPLK	0.999996
Q9HDC5	Junctophilin-1	JPH1	T	460	KPPTPKESPHFYRKGTTPPRSPEASPKHSHS	0.997223
P05412	Transcription factor AP-1	JUN	S	63	SLKPHLRAKNSDLLTSPDVGLLKLASPELER	0.997766
P17535	Transcription factor AP-1;Transcription factor jun-D	JUN;JUND	S	100	DGLLASPDLGLLKLASPELERLIIQSNGLVT;SDLLTSPDVGLLKLASPELERLIIQSSNGHI	1
Q63ZY3	KN motif and ankyrin repeat domain-containing protein 2	KANK2	S	19	VLHVPAPFPGTPGPASPPAFPAKDPDPPYSV	0.999626
O95251	Histone acetyltransferase KAT7;Histone acetyltransferase	KAT7	S	162	VSHDESIAKDMSLKDSGSDLSHRPKRRRFHE	0.998287
O95251	Histone acetyltransferase KAT7	KAT7	S	57	VTRSSARLSQSSQDSSPVRNLQSFGTEEPAY	0.960328
O75449	Katanin p60 ATPase-containing subunit A1	KATNA1	S	170	REKKEQNKGREEKNKSPAAVTEPETNKFDST	1
O94819	Kelch repeat and BTB domain-containing protein 11	KBTBD11	S	314	AALGPAGERAGSRPQSPSGDADARGDAAVYC	0.970385
O94819	Kelch repeat and BTB domain-containing protein 11	KBTBD11	S	310	HLLAAALGPAGERAGSRPQSPSGDADARGDA	0.997415
Q13303-2	Voltage-gated potassium channel subunit beta-2	KCNAB2	S	9	_______MYPESTTGSPARLSLRQTGSPGMI	0.99735
Q96CX2	BTB/POZ domain-containing protein KCTD12	KCTD12	S	185	ASAGAPSPTLELASRSPSGGAAGPLLTPSQS	0.972974
Q7Z4H8	KDEL motif-containing protein 2	KDELC2	S	421	ALEPWKHYVPIKRNLSDLLEKVKWAKENDEE	1
O60341	Lysine-specific histone demethylase 1A	KDM1A	S	849	YTLPRQATPGVPAQQSPSM____________	0.974442
Q9Y2K7	Lysine-specific demethylase 2A	KDM2A	S	558	MKPAPRLTPVRPAAASPIVSGARRRRVRCRK	0.999173
Q9Y2K7	Lysine-specific demethylase 2A	KDM2A	S	692	QEDSSEKAQKRKMEESDEEAVQAKVLRPLRS	1
Q8NHM5	Lysine-specific demethylase 2B	KDM2B	S	951	RRKRRLPNKELSRELSKELNHEIQRTENSLA	0.999997
Q8NHM5	Lysine-specific demethylase 2B	KDM2B	S	474	KKPKAPALRFLKRTLSNESEESVKSTTLAVD	0.987077
Q8NHM5	Lysine-specific demethylase 2B	KDM2B	S	795	EHSKKVPPDGLLRRKSDDVHLRKKRKYEKPQ	1
Q8NHM5	Lysine-specific demethylase 2B	KDM2B	S	497	KSTTLAVDYPKTPTGSPATEVSAKWTHLTEF	0.998231
Q8NHM5	Lysine-specific demethylase 2B	KDM2B	S	1031	LRSPPRVISRPPPSVSPPKCIQMERHVIRPP	0.989159
Q8NHM5	Lysine-specific demethylase 2B	KDM2B	T	493	EESVKSTTLAVDYPKTPTGSPATEVSAKWTH	0.997376
Q8NHM5	Lysine-specific demethylase 2B	KDM2B	S	497	KSTTLAVDYPKTPTGSPATEVSAKWTHLTEF	0.998231
Q8NHM5	Lysine-specific demethylase 2B	KDM2B	T	493	EESVKSTTLAVDYPKTPTGSPATEVSAKWTH	0.997376
Q9Y4C1	Lysine-specific demethylase 3A	KDM3A	S	325	PSKDPRQQSTPQAANSPPNLGAKIPQGCHKQ	1
Q9Y4C1	Lysine-specific demethylase 3A	KDM3A	S	264	VTCGNSARIGAVKRKSSENNGTLVSKQAKSC	0.976235
Q7LBC6	Lysine-specific demethylase 3B	KDM3B	S	7	_________MADAAASPVGKRLLLLFADTAA	1
Q7LBC6	Lysine-specific demethylase 3B	KDM3B	S	278	TLKAVKSSKGKKKRESIEGKDGRRRKSASDS	1
Q7LBC6	Lysine-specific demethylase 3B	KDM3B	S	1267	HSPFGLDSFNSTAKVSPLTPKLFNSLLLGPT	0.999826
O94953	Lysine-specific demethylase 4B	KDM4B	S	566	FEHFAQKGPTWKEPVSPMELTGPEDGAASSG	0.999999
P41229	Lysine-specific demethylase 5C	KDM5C	S	1359	MPKVQGLLENGDSVTSPEKVAPEEGSGKRDL	0.975709
O15054	Lysine-specific demethylase 6B	KDM6B	T	637	FRRPESPRPRVSFPKTPEVGPGPPPGPLSKA	1
Q06136	3-ketodihydrosphingosine reductase	KDSR	S	80	NEDKLLQAKKEIEMHSINDKQVVLCISVDVS	1
Q07666	KH domain-containing, RNA-binding, signal transduction-associated protein 1	KHDRBS1	S	20	DDPAARMSRSSGRSGSMDPSGAHPSVRQTPS	0.995398
O15037	Protein KHNYN	KHNYN	S	353	SRGASLLQRLHNGNASPPRVPSPPPAPEPPW	1
O15037	Protein KHNYN	KHNYN	S	10	______MPTWGARPASPDRFAVSAEAENKVR	0.999969
Q92945	Far upstream element-binding protein 2	KHSRP	S	99	IAAKIGGDAATTVNNSTPDFGFGGQKRQLED	0.900671
Q92945	Far upstream element-binding protein 2	KHSRP	S	480	PPNGDPNFKLFIIRGSPQQIDHAKQLIEEKI	1
Q92945	Far upstream element-binding protein 2	KHSRP	S	181	QINKIQQDSGCKVQISPDSGGLPERSVSLTG	0.999895
Q92945	Far upstream element-binding protein 2	KHSRP	T	100	AAKIGGDAATTVNNSTPDFGFGGQKRQLEDG	0.982364
Q14667	Protein KIAA0100	KIAA0100	S	1484	LYDGYKKAAVLKRNLSTEALKGLKIDPQMPA	0.936737
Q14667	Protein KIAA0100	KIAA0100	S	2094	QGLTRSSGVRRSFRKSPEHPVDDIDKMKERA	1
Q14667	Protein KIAA0100	KIAA0100	S	2199	KSATGSEVRGKLETKSDLNMQQQEEEEKARL	1
Q14667	Protein KIAA0100	KIAA0100	T	2197	RLKSATGSEVRGKLETKSDLNMQQQEEEEKA	1
Q15004	PCNA-associated factor	KIAA0101	S	72	PTPKWQKGIGEFFRLSPKDSEKENQIPEEAG	1
Q92622	Run domain Beclin-1 interacting and cysteine-rich containing protein	KIAA0226	S	197	LLAQIDASMFARKHESPLLVTKSQSLTALPS	1
Q8IZA0	Dyslexia-associated protein KIAA0319-like protein	KIAA0319L	S	1043	QNGSVPNGQTPLKARSPREEIL_________	1
Q9Y4F3	Meiosis arrest female protein 1	KIAA0430	S	1718	SSETSESLLSKDPVESPAKKQPKNRVKLAAN	1
Q9Y4F3	Meiosis arrest female protein 1	KIAA0430	S	66	YMENKKVAVELKDVPSPLHAGSKLFPAVPLP	0.999983
Q9Y4F3	Meiosis arrest female protein 1	KIAA0430	S	1093	KPPPPNTDPWLLRSKSPVGNPQLIQFSREVI	1
A2VDJ0	Transmembrane protein 131-like	KIAA0922	S	967	PVNTPQSRIQNAAKRSPATYGHSQKKHKCSV	0.999958
Q6ICG6	Uncharacterized protein KIAA0930	KIAA0930	S	304	STPPTPERNNRPAFFSPSLKRKVPRNRIAEM	0.985449
Q2M389	WASH complex subunit 7	KIAA1033	S	7	_________MAVETLSPDWEFDRVDDGSQKI	0.999851
Q9UPP5	Uncharacterized protein KIAA1107	KIAA1107	T	507	SSRQSDENVAKLDHNTTTEKQAPKRKMVKQV	1
Q9UPP5	Uncharacterized protein KIAA1107	KIAA1107	T	508	SRQSDENVAKLDHNTTTEKQAPKRKMVKQVH	1
Q9UPP5	Uncharacterized protein KIAA1107	KIAA1107	T	509	RQSDENVAKLDHNTTTEKQAPKRKMVKQVHT	1
Q2LD37	Uncharacterized protein KIAA1109	KIAA1109	S	2755	EPTCKVVFENEQDNSSLTKTQRKRSLVTSEP	0.900088
Q96AT1	Uncharacterized protein KIAA1143	KIAA1143	S	50	TKRIQPQPPDEDGDHSDKEDEQPQVVVLKKG	1
Q6ZU35	Uncharacterized protein KIAA1211	KIAA1211	S	556	VSSGGKQILFPKVNLSPVTPAKDTGLTAAPQ	0.999759
Q86T90	Uncharacterized protein KIAA1328	KIAA1328	S	484	PQRGTVTGVRKDASTSPMPTGSLKDFVTTAS	0.920306
Q69YN4	Protein virilizer homolog	KIAA1429	S	173	NPKHADGEKEDQFNGSPPRPQPRGPRTPPGP	1
Q69YN4	Protein virilizer homolog	KIAA1429	S	222	KEEDAPHREDYFEPISPDRNSVPQEGQYSDE	1
Q9P266	Junctional protein associated with coronary artery disease	KIAA1462	S	1235	VERTPSVAGSEKRLRSPSKVIESLQEKLASP	0.987422
Q9P260	LisH domain and HEAT repeat-containing protein KIAA1468	KIAA1468	S	180	EPSTASGGGQLNRAGSISTLDSLDFARYSDD	0.997004
Q9HCM1	Uncharacterized protein KIAA1551	KIAA1551	S	1358	NKDVYKKHSSLGQSLSPEKIKLKLKSVSFKQ	0.999851
Q9HCM1	Uncharacterized protein KIAA1551	KIAA1551	Y	509	CRRFNQVDSVLPNPVYSEKRPMPDSSHDVKV	0.972081
A0MZ66	Shootin-1	KIAA1598	S	493	ERILRRRKVTAEADSSSPTGILATSESKSMP	0.818519
A0MZ66	Shootin-1	KIAA1598	S	494	RILRRRKVTAEADSSSPTGILATSESKSMPV	0.877817
Q9ULH0	Kinase D-interacting substrate of 220 kDa	KIDINS220	S	1555	DKDRKAEGKVERVPKSPEHSAEPIRTFIKAK	0.99988
P52732	Kinesin-like protein KIF11	KIF11	T	926	CFLEQDLKLDIPTGTTPQRKSYLYPSTLVRT	0.9333
Q9NQT8	Kinesin-like protein KIF13B	KIF13B	S	1381	KEQLTGKGKLSRRSISSPNVNRLSGSRQDLI	0.801793
Q9NS87	Kinesin-like protein KIF15;Kinesin-like protein	KIF15	S	568	EISGMEKSDKNQQGFSPKAQKEPCLFANTEK	1
Q8NI77	Kinesin-like protein KIF18A	KIF18A	S	674	VKIPTEKRTRRKLMPSPLKGQHTLKSPPSQS	1
Q86Y91	Kinesin-like protein KIF18B;Kinesin-like protein	KIF18B	S	413	VYEGGGQPPPQDLPGSPKSGPPPEHLPSSPL	1
O60333-2	Kinesin-like protein KIF1B;Kinesin-like protein	KIF1B;KIF1Bbeta	S	1408	TGIYELSLCKMSDTGSPGMQRRRRKILDTSV	0.99229
O95235	Kinesin-like protein KIF20A	KIF20A	S	532	FPSLHSFIKEHSLQVSPSLEKGAKADTGLDD	0.972963
Q96Q89	Kinesin-like protein KIF20B	KIF20B	S	1740	KKEGTLQKFGDFLQHSPSILQSKAKKIIETM	0.942874
Q96Q89	Kinesin-like protein KIF20B	KIF20B	S	1573	SKIETQIMDIKPKRISSADPDKLQTEPLSTS	0.8224
Q96Q89	Kinesin-like protein KIF20B	KIF20B	S	952	QSNYDIAIAELHVQKSKNQEQEEKIMKLSNE	1
Q96Q89	Kinesin-like protein KIF20B	KIF20B	S	1658	TTPVTVKIPKARKRKSNEMEEDLVKCENKKN	1
Q7Z4S6	Kinesin-like protein KIF21A	KIF21A	S	1662	TVRIWKARNLQDGQISDTGDLGEDIASN___	0.99849
Q7Z4S6	Kinesin-like protein KIF21A	KIF21A	S	1673	DGQISDTGDLGEDIASN______________	1
Q7Z4S6	Kinesin-like protein KIF21A	KIF21A	S	1212	MNTETSGTSAREKELSPPPGLPSKIGSISRQ	1
Q7Z4S6	Kinesin-like protein KIF21A	KIF21A	S	1229	PPGLPSKIGSISRQSSLSEKKIPEPSPVTRR	0.993264
Q7Z4S6	Kinesin-like protein KIF21A	KIF21A	S	1225	ELSPPPGLPSKIGSISRQSSLSEKKIPEPSP	0.826363
Q7Z4S6	Kinesin-like protein KIF21A	KIF21A	S	1229	PPGLPSKIGSISRQSSLSEKKIPEPSPVTRR	0.993264
O75037	Kinesin-like protein KIF21B	KIF21B	S	1215	TRGSTFPRQSRATETSPLTRRKSYDRGQPIR	0.992905
O75037	Kinesin-like protein KIF21B	KIF21B	S	1167	CLGPPLDISTKNITKSLASLVEIKEDGVGFS	0.999943
Q14807	Kinesin-like protein KIF22;Kinesin-like protein	KIF22	S	543	KAVVMPLQLIQEQAASPNAEIHILKNKGRKR	1
Q02241	Kinesin-like protein KIF23;Kinesin-like protein	KIF23	S	605	QQELETQNQKLQRQFSDKRRLEARLQGMVTE	1
Q02241	Kinesin-like protein KIF23;Kinesin-like protein	KIF23	S	867	LAKCEKYMLTHQELASDGEIETKLIKGDIYK	0.908412
O95239	Chromosome-associated kinesin KIF4A;Chromosome-associated kinesin KIF4B	KIF4A;KIF4B	S	394	VEPSENLQSLMEKNQSLVEENEKLSRGLSEA	1
Q9BW19	Kinesin-like protein KIFC1	KIFC1	S	6	__________MDPQRSPLLEVKGNIELKRPL	1
[truncated: 3,218 more rows]

## Sheet: OCI-AML3 Phosphoproteome
Phosphoproteome identified in OCI-AML3 cells
Protein	Protein names	Gene names	Amino acid	Position	Sequence window	Localization probability
A0A096LP25	Uncharacterized protein FLJ45252	AAK1	S	249	PGKLGGAVPFAPPEVSPEQAKTVQGGRKNQF	1
Q2M2I8	AP2-associated protein kinase 1	AAK1	T	620	TTPPPAVQGQKVGSLTPPSSPKTQRAGHRRI	0.999762
Q2M2I8	AP2-associated protein kinase 1	AAK1	T	606	PAIQAPVRQQPKVQTTPPPAVQGQKVGSLTP	0.998299
Q2M2I8	AP2-associated protein kinase 1	AAK1	S	623	PPAVQGQKVGSLTPPSSPKTQRAGHRRILSD	0.789987
Q2M2I8	AP2-associated protein kinase 1	AAK1	T	620	TTPPPAVQGQKVGSLTPPSSPKTQRAGHRRI	0.999762
C9JG97		AAMP	S	14	__MLLSVPLTASRAPSSNPLPKADDLAQEME	0.998618
Q9BZC7	ATP-binding cassette sub-family A member 2	ABCA2	S	1327	TTLEEVFLKVSEEDQSLENSEADVKESRKDV	0.999996
Q9BZC7	ATP-binding cassette sub-family A member 2	ABCA2	S	1331	EVFLKVSEEDQSLENSEADVKESRKDVLPGA	1
Q8NE71	ATP-binding cassette sub-family F member 1	ABCF1	S	140	KTKGGNVFAALIQDQSEEEEEEEKHPPKPAK	1
Q8NE71	ATP-binding cassette sub-family F member 1	ABCF1	S	22	QQPPEPEWIGDGESTSPSDKVVKKGKKDKKI	0.967088
Q8NE71	ATP-binding cassette sub-family F member 1	ABCF1	Y	551	FKKMYQQKQKELLKQYEKQEKKLKELKAGGK	1
Q8IZP0	Abl interactor 1	ABI1	S	225	PNDYMTSPARLGSQHSPGRTASLNQRPRTHS	0.999304
Q9NYB9	Abl interactor 2	ABI2	S	183	MGGLPRTTPPTQKPPSPPMSGKGTLGRHSPY	0.937367
P00519	Tyrosine-protein kinase ABL1	ABL1	S	569	KGQGESDPLDHEPAVSPLLPRKERGPPEGGL	0.994968
P42684	Abelson tyrosine-protein kinase 2	ABL2	S	631	ASSGSPALPRKQRDKSPSSLLEDAKETCFTR	0.962582
P42684	Abelson tyrosine-protein kinase 2	ABL2	S	936	PVLPTTHNHKVPVLISPTLKHTPADVQLIGT	0.921543
Q15057	Arf-GAP with coiled-coil, ANK repeat and PH domain-containing protein 2	ACAP2	S	521	KYVERKFVDKYSISLSPPEQQKKFVSKSSEE	0.99998
E7EQT4	Apoptotic chromatin condensation inducer in the nucleus	ACIN1	S	450	GGLSPLSSPSDTKAESPAEKVPEESVLPLVQ	1
E7EQT4	Apoptotic chromatin condensation inducer in the nucleus	ACIN1	S	798	KISVVSATKGVPAGNSDTEGGQPGRKRRWGA	0.978997
E7EQT4	Apoptotic chromatin condensation inducer in the nucleus	ACIN1	S	689	SAEKHVTQRLQPERGSPKKCEAEEAEPPAAT	0.999875
E7EQT4	Apoptotic chromatin condensation inducer in the nucleus	ACIN1	S	964	VSITIDDPVRTAQVPSPPRGKISNIVHISNL	0.936204
E7EQT4	Apoptotic chromatin condensation inducer in the nucleus	ACIN1	S	325	SHLARQQQEKEMKTTSPLEEEEREIKSSQGL	0.947873
E7EQT4	Apoptotic chromatin condensation inducer in the nucleus	ACIN1	T	374	ASLVALPEQTASEEETPPPLLTKEASSPPPH	0.999516
E7EQT4	Apoptotic chromatin condensation inducer in the nucleus	ACIN1	S	615	RSRSRSRSASSNSRKSLSPGVSRDSSTSYTE	1
E7EQT4	Apoptotic chromatin condensation inducer in the nucleus	ACIN1	S	617	RSRSRSASSNSRKSLSPGVSRDSSTSYTETK	1
E7EQT4	Apoptotic chromatin condensation inducer in the nucleus	ACIN1	S	615	RSRSRSRSASSNSRKSLSPGVSRDSSTSYTE	1
E7EQT4	Apoptotic chromatin condensation inducer in the nucleus	ACIN1	S	617	RSRSRSASSNSRKSLSPGVSRDSSTSYTETK	1
P53396	ATP-citrate synthase	ACLY	S	455	NASGSTSTPAPSRTASFSESRADEVAPAKKA	0.99579
Q99798	Aconitate hydratase, mitochondrial	ACO2	S	122	MLQFISSGLSKVAVPSTIHCDHLIEAQVGGE	0.821928
P60709	Actin, cytoplasmic 1;Actin, cytoplasmic 1, N-terminally processed	ACTB	S	14	__MDDDIAALVVDNGSGMCKAGFAGDDAPRA	1
P63261	Actin, cytoplasmic 1;Actin, cytoplasmic 1, N-terminally processed;Actin, cytoplasmic 2;Actin, cytoplasmic 2, N-terminally processed;Actin, alpha cardiac muscle 1;Actin, alpha skeletal muscle;Actin, aortic smooth muscle;Actin, gamma-enteric smooth muscle	ACTB;ACTG1;ACTC1;ACTA1;ACTA2;ACTG2	S	60	VGMGQKDSYVGDEAQSKRGILTLKYPIEHGI	0.999986
P63261	Actin, cytoplasmic 1;Actin, cytoplasmic 1, N-terminally processed;Actin, cytoplasmic 2;Actin, cytoplasmic 2, N-terminally processed;Actin, alpha cardiac muscle 1;Actin, alpha skeletal muscle;Actin, aortic smooth muscle;Actin, gamma-enteric smooth muscle	ACTB;ACTG1;ACTC1;ACTA1;ACTA2;ACTG2	S	323	GIADRMQKEITALAPSTMKIKIIAPPERKYS	0.902615
P63261	Actin, cytoplasmic 1;Actin, cytoplasmic 1, N-terminally processed;Actin, cytoplasmic 2;Actin, cytoplasmic 2, N-terminally processed;POTE ankyrin domain family member E	ACTB;ACTG1;POTEE	T	229	EKLCYVALDFEQEMATAASSSSLEKSYELPD	0.999247
P63261	Actin, cytoplasmic 1;Actin, cytoplasmic 1, N-terminally processed;Actin, cytoplasmic 2;Actin, cytoplasmic 2, N-terminally processed;POTE ankyrin domain family member E	ACTB;ACTG1;POTEE	Y	218	MAEREIVRDIKEKLCYVALDFEQEMATAASS;TAEREIVRDIKEKLCYVALDFEQEMATAASS	1
P63261	Actin, cytoplasmic 2;Actin, cytoplasmic 2, N-terminally processed	ACTG1	S	14	__MEEEIAALVIDNGSGMCKAGFAGDDAPRA	1
O96019	Actin-like protein 6A	ACTL6A	S	233	VPPYMIASKEAVREGSPANWKRKEKLPQVTR	1
Q08043	Alpha-actinin-3	ACTN3	T	221	DYAKLRKDDPIGNLNTAFEVAEKYLDIPKML	1
P61160	Actin-related protein 2	ACTR2	T	117	TRNCKILLTEPPMNPTKNREKIVEVMFETYQ	1
P78536	Disintegrin and metalloproteinase domain-containing protein 17	ADAM17	S	791	GFEKDPFPNSSTAAKSFEDLTDHPVTRSEKA	0.999568
P55265	Double-stranded RNA-specific adenosine deaminase	ADAR	T	601	HYSTEKESEKTAESQTPTPSATSFFSGKSPV	0.999574
P78563-6	Double-stranded RNA-specific editase 1	ADARB1	S	26	SSSTDVKENRNLDNVSPKDGSTPGPGEGSQL	1
P35612	Beta-adducin	ADD2	S	592	LELDGEKETAPEEPGSPAKSAPASPVQSPAK	1
Q9UEY8	Gamma-adducin	ADD3	S	677	IKSPEKIEEVLSPEGSPSKSPSKKKKKFRTP	0.976996
Q9UEY8	Gamma-adducin	ADD3	S	673	IEITIKSPEKIEEVLSPEGSPSKSPSKKKKK	0.999977
Q9UEY8	Gamma-adducin	ADD3	S	677	IKSPEKIEEVLSPEGSPSKSPSKKKKKFRTP	0.976996
Q9UEY8	Gamma-adducin;Alpha-adducin;Beta-adducin	ADD3;ADD1;ADD2	S	693	PGKSPSKKKKKFRTPSFLKKSKKKSDS____;PSKSPSKKKKKFRTPSFLKKNKKKEKVEA__;PSKSPSKKKKKFRTPSFLKKSKKKEKVES__	0.999281
Q9H2P0	Activity-dependent neuroprotector homeobox protein	ADNP	S	953	TIHLTEEPTKLMHNASDSEVDQDDVVEWKDG	1
Q9H2P0	Activity-dependent neuroprotector homeobox protein	ADNP	S	921	DNPEEHVLKVIPEDASESEEKLDQKEDGSKY	0.986021
Q9H2P0	Activity-dependent neuroprotector homeobox protein	ADNP	S	953	TIHLTEEPTKLMHNASDSEVDQDDVVEWKDG	1
Q9H2P0	Activity-dependent neuroprotector homeobox protein	ADNP	S	955	HLTEEPTKLMHNASDSEVDQDDVVEWKDGAS	1
P25098	Beta-adrenergic receptor kinase 1	ADRBK1	S	670	QQLVQRVPKMKNKPRSPVVELSKVPLVQRGS	0.999994
P25098	Beta-adrenergic receptor kinase 1	ADRBK1	S	685	SPVVELSKVPLVQRGSANGL___________	1
P30566	Adenylosuccinate lyase	ADSL	S	9	_______MAAGGDHGSPDSYRSPLASRYASP	0.999384
P51825	AF4/FMR2 family member 1	AFF1	S	750	RKDRLPLPLRDTKLLSPLRDTPPPQSLMVKI	0.975018
P51825	AF4/FMR2 family member 1	AFF1	S	588	APPEAPHPGKRSCQKSPAQQEPPQRQTVGTK	0.999998
Q9UHB7	AF4/FMR2 family member 4	AFF4	S	1058	SPGLGSKAVGMPSPVSPKLSPGNSGNYSSGA	0.996954
Q9UHB7	AF4/FMR2 family member 4	AFF4	S	814	ESSKQSAAKEKDLLPSPAGPVPSKDPKTEHG	0.99994
Q9UHB7	AF4/FMR2 family member 4	AFF4	S	1043	LTEHLKNSYNNSQAPSPGLGSKAVGMPSPVS	0.999807
Q96P47	Arf-GAP with GTPase, ANK repeat and PH domain-containing protein 3	AGAP3	S	538	PAEVLSSSPKLDPPPSPHSNRKKHRRKKSTG	0.974668
P52594	Arf-GAP domain and FG repeat-containing protein 1	AGFG1	S	181	DSAPTLHLNKGTPSQSPVVGRSQGQQQEKKQ	0.999197
P52594	Arf-GAP domain and FG repeat-containing protein 1	AGFG1	S	181	DSAPTLHLNKGTPSQSPVVGRSQGQQQEKKQ	0.999197
P52594	Arf-GAP domain and FG repeat-containing protein 1	AGFG1	T	177	SLLGDSAPTLHLNKGTPSQSPVVGRSQGQQQ	0.999993
Q8WYP5	Protein ELYS	AHCTF1	S	1283	EWLKSKDRTTSFFLNSPEKEHQEMDEGSQSL	1
Q8WYP5	Protein ELYS	AHCTF1	S	1295	FLNSPEKEHQEMDEGSQSLEKLDVSKGNSSV	0.832783
Q8WYP5	Protein ELYS	AHCTF1	S	1944	QLRIKHVRRVRGREVSPSDVREDSNLESSQL	0.99876
Q8WYP5	Protein ELYS	AHCTF1	T	1369	QTEKDGDKDVFASEVTPSDLQKQMGNLEDAE	0.959845
Q09666	Neuroblast differentiation-associated protein AHNAK	AHNAK	S	5110	FDIKSPKFKAEAPLPSPKLEGELQAPDLELS	1
Q09666	Neuroblast differentiation-associated protein AHNAK	AHNAK	S	5749	ASISGSKGDLKSSKASLGSLEGEAEAEASSP	1
Q09666	Neuroblast differentiation-associated protein AHNAK	AHNAK	S	5752	SGSKGDLKSSKASLGSLEGEAEAEASSPKGK	1
Q09666	Neuroblast differentiation-associated protein AHNAK	AHNAK	S	5763	ASLGSLEGEAEAEASSPKGKFSLFKSKKPRH	0.92186
Q09666	Neuroblast differentiation-associated protein AHNAK	AHNAK	S	177	VDVTGREGAKDIDISSPEFKIKIPRHELTEI	0.994628
Q09666	Neuroblast differentiation-associated protein AHNAK	AHNAK	S	5620	ALNLDTSKFAGGLHFSGPKVEGGVKGGQIGL	1
Q09666	Neuroblast differentiation-associated protein AHNAK	AHNAK	S	5830	GKHGKLKFGTFGGLGSKSKGHYEVTGSDDET	0.999999
Q09666	Neuroblast differentiation-associated protein AHNAK	AHNAK	S	5731	KFNFSKPKGKGGVTGSPEASISGSKGDLKSS	0.999974
Q09666	Neuroblast differentiation-associated protein AHNAK	AHNAK	S	5737	PKGKGGVTGSPEASISGSKGDLKSSKASLGS	0.84545
Q09666	Neuroblast differentiation-associated protein AHNAK	AHNAK	S	5739	GKGGVTGSPEASISGSKGDLKSSKASLGSLE	0.898632
Q09666	Neuroblast differentiation-associated protein AHNAK	AHNAK	S	5841	GGLGSKSKGHYEVTGSDDETGKLQGSGVSLA	0.998616
Q09666	Neuroblast differentiation-associated protein AHNAK	AHNAK	S	5448	LKGPGVDVNLKGPRISAPNVDFNLEGPKVKG	1
Q09666	Neuroblast differentiation-associated protein AHNAK	AHNAK	S	511	QKPKISMQDVDLSLGSPKLKGDIKVSAPGVQ	0.996741
Q09666	Neuroblast differentiation-associated protein AHNAK	AHNAK	S	216	SGKTVIRLPSGSGAASPTGSAVDIRAGAISA	0.926922
Q09666	Neuroblast differentiation-associated protein AHNAK	AHNAK	S	5851	YEVTGSDDETGKLQGSGVSLASKKSRLSSSS	0.999397
Q09666	Neuroblast differentiation-associated protein AHNAK	AHNAK	S	5857	DDETGKLQGSGVSLASKKSRLSSSSSNDSGN	0.99593
Q09666	Neuroblast differentiation-associated protein AHNAK	AHNAK	S	3411	GKVKGSKFKMPFLSISSPKVSMPDVELNLKS	0.910194
Q09666	Neuroblast differentiation-associated protein AHNAK	AHNAK	S	3412	KVKGSKFKMPFLSISSPKVSMPDVELNLKSP	0.860229
Q09666	Neuroblast differentiation-associated protein AHNAK	AHNAK	S	135	EYQRIYTTKIKPRLKSEDGVEGDLGETQSRT	1
Q09666	Neuroblast differentiation-associated protein AHNAK	AHNAK	T	5824	EGGKVKGKHGKLKFGTFGGLGSKSKGHYEVT	1
Q09666	Neuroblast differentiation-associated protein AHNAK	AHNAK	T	4100	PKADIDVSGPKVDIDTPDIDIHGPEGKLKGP	1
Q09666	Neuroblast differentiation-associated protein AHNAK	AHNAK	T	3716	KGPEVDIKGPKVDIDTPDINIEGSEGKFKGP	1
Q09666	Neuroblast differentiation-associated protein AHNAK	AHNAK	S	5749	ASISGSKGDLKSSKASLGSLEGEAEAEASSP	1
Q09666	Neuroblast differentiation-associated protein AHNAK	AHNAK	S	5752	SGSKGDLKSSKASLGSLEGEAEAEASSPKGK	1
Q09666	Neuroblast differentiation-associated protein AHNAK	AHNAK	S	5731	KFNFSKPKGKGGVTGSPEASISGSKGDLKSS	0.999974
Q09666	Neuroblast differentiation-associated protein AHNAK	AHNAK	S	5739	GKGGVTGSPEASISGSKGDLKSSKASLGSLE	0.898632
Q09666	Neuroblast differentiation-associated protein AHNAK	AHNAK	S	5851	YEVTGSDDETGKLQGSGVSLASKKSRLSSSS	0.999397
Q09666	Neuroblast differentiation-associated protein AHNAK	AHNAK	S	5857	DDETGKLQGSGVSLASKKSRLSSSSSNDSGN	0.99593
Q09666	Neuroblast differentiation-associated protein AHNAK	AHNAK	S	5749	ASISGSKGDLKSSKASLGSLEGEAEAEASSP	1
Q09666	Neuroblast differentiation-associated protein AHNAK	AHNAK	S	5752	SGSKGDLKSSKASLGSLEGEAEAEASSPKGK	1
Q09666	Neuroblast differentiation-associated protein AHNAK	AHNAK	S	5763	ASLGSLEGEAEAEASSPKGKFSLFKSKKPRH	0.92186
Q09666	Neuroblast differentiation-associated protein AHNAK	AHNAK	S	5731	KFNFSKPKGKGGVTGSPEASISGSKGDLKSS	0.999974
Q09666	Neuroblast differentiation-associated protein AHNAK	AHNAK	S	5735	SKPKGKGGVTGSPEASISGSKGDLKSSKASL	0.948457
Q09666	Neuroblast differentiation-associated protein AHNAK	AHNAK	S	5737	PKGKGGVTGSPEASISGSKGDLKSSKASLGS	0.84545
P55008	Allograft inflammatory factor 1	AIF1	S	2	______________MSQTRDLQGGKAFGLLK	0.98142
P55008	Allograft inflammatory factor 1	AIF1	S	39	LDEINKQFLDDPKYSSDEDLPSKLEGFKEKY	0.999983
O95831	Apoptosis-inducing factor 1, mitochondrial	AIFM1	S	116	GLGLTPEQKQKKAALSASEGEEVPQDKAPSH	0.997842
Q92667	A-kinase anchor protein 1, mitochondrial	AKAP1	S	445	PPPKTYVSCLKSLLSSPTKDSKPNISAHHIS	0.925238
Q92667	A-kinase anchor protein 1, mitochondrial	AKAP1	T	533	DSCTETSSSPRDKAITPPLPESTVPFSNGVL	0.986288
Q92667	A-kinase anchor protein 1, mitochondrial	AKAP1	T	70	KEPLPVEDVCPKVVSTPPSVTEPPEKELSTV	0.960009
O43572	A-kinase anchor protein 10, mitochondrial	AKAP10	S	52	KTSDVKSIKASISVHSPQKSTKNHALLEAAG	0.999898
Q12802	A-kinase anchor protein 13	AKAP13	S	1929	GNDENMSNTWKFLSHSTDSLNKISKVNESTE	0.926397
Q12802	A-kinase anchor protein 13	AKAP13	S	1929	GNDENMSNTWKFLSHSTDSLNKISKVNESTE	0.926397
Q12802	A-kinase anchor protein 13	AKAP13	S	1932	ENMSNTWKFLSHSTDSLNKISKVNESTESLT	0.99966
Q02040	A-kinase anchor protein 17A	AKAP17A	S	499	LHPLGGQPPAGAPKESPAHPEADGAPKSVNG	1
Q9Y2D5	A-kinase anchor protein 2	AKAP2	S	748	EEELKRQRQVLQSTQSPRTKNAPSLPSRTCY	0.802355
Q9Y2D5	A-kinase anchor protein 2	AKAP2	S	393	GPPEDSGASAAKGQKSPGALETPSAAGSQGN	1
Q9Y2D5	A-kinase anchor protein 2	AKAP2	S	778	YKTAPGKIEKVKPPPSPTTEGPSLQPDLAPE	0.887899
Q9ULX6	A-kinase anchor protein 8-like	AKAP8L	S	552	KKLERYLKGENPFTDSPEEEKEQEEAEGGAL	0.995746
Q9ULX6	A-kinase anchor protein 8-like	AKAP8L	S	326	EATEGLEGTEAVEKGSRVDGEDEEGKEDGRE	1
Q53H80	Akirin-2	AKIRIN2	S	21	TLKRTLDFDPLLSPASPKRRRCAPLSAPTSA	0.999019
Q7Z591	AT-hook-containing transcription factor	AKNA	S	52	SSQSWEEERLFPNATSPELLEDFRLAQQHLP	0.956175
P00352	Retinal dehydrogenase 1	ALDH1A1	S	360	QIDKEQYDKILDLIESGKKEGAKLECGGGPW	1
P04075	Fructose-bisphosphate aldolase A;Fructose-bisphosphate aldolase	ALDOA	S	36	HRIVAPGKGILAADESTGSIAKRLQSIGTEN	0.877813
P04075	Fructose-bisphosphate aldolase A;Fructose-bisphosphate aldolase	ALDOA	S	39	VAPGKGILAADESTGSIAKRLQSIGTENTEE	0.990006
P04075	Fructose-bisphosphate aldolase A;Fructose-bisphosphate aldolase	ALDOA	S	46	LAADESTGSIAKRLQSIGTENTEENRRFYRQ	1
P04075	Fructose-bisphosphate aldolase A;Fructose-bisphosphate aldolase	ALDOA	T	119	VVGIKVDKGVVPLAGTNGETTTQGLDGLSER	0.989096
Q6P6C2	RNA demethylase ALKBH5	ALKBH5	S	64	EPYPVSGAKRKYQEDSDPERSDYEEQQLQKE	0.992733
Q5JTC6-2	APC membrane recruitment protein 1	AMER1	S	246	PQDAPGPKVSPTPEPSPPATEKMACKDPEKP	0.986703
Q8IWZ3	Ankyrin repeat and KH domain-containing protein 1	ANKHD1	S	1679	VSLPLSSPNIKLNLTSPKRGQKREEGWKEVV	0.995229
Q9P2G1	Ankyrin repeat and IBR domain-containing protein 1	ANKIB1	S	737	QEFLASVARGVAPADSPEAPRRSFAGGTWDW	1
B5MBY4	Ankyrin repeat and MYND domain-containing protein 1	ANKMY1	S	622	RAELIPSHRMKKKGPSLPRGLDVKEQGQIPF	1
Q6UB99	Ankyrin repeat domain-containing protein 11	ANKRD11	S	505	EDDRDSLGSSGCLKGSPLVLKDPSLFSSLSA	1
Q6UB99	Ankyrin repeat domain-containing protein 11	ANKRD11	S	276	QQSNRKGETPLKVANSPTMVNLLLGKGTYTS	0.927204
Q6UB99	Ankyrin repeat domain-containing protein 11	ANKRD11	S	1983	ENPVSWPVGSDLLLKSPQRFPESPKRFCPAD	1
Q6UB99	Ankyrin repeat domain-containing protein 11	ANKRD11	S	1990	VGSDLLLKSPQRFPESPKRFCPADPLHSAAP	1
Q6UB98	Ankyrin repeat domain-containing protein 12	ANKRD12	S	975	KKEKSRDKESINITNSKHIQEEKKSSIVDGN	0.999994
Q6UB98	Ankyrin repeat domain-containing protein 12	ANKRD12	T	973	LDKKEKSRDKESINITNSKHIQEEKKSSIVD	0.999994
O75179	Ankyrin repeat domain-containing protein 17	ANKRD17	S	1709	GPSPLSSPNGKLTVASPKRGQKREEGWKEVV	1
O75179	Ankyrin repeat domain-containing protein 17	ANKRD17	S	1696	EGTSNSLSTCTKSGPSPLSSPNGKLTVASPK	0.995618
O75179	Ankyrin repeat domain-containing protein 17	ANKRD17	S	1700	NSLSTCTKSGPSPLSSPNGKLTVASPKRGQK	0.912491
Q5VUR7	Ankyrin repeat domain-containing protein 20A3;Ankyrin repeat domain-containing protein 20A1;Ankyrin repeat domain-containing protein 20A2;Ankyrin repeat domain-containing protein 20A4	ANKRD20A3;ANKRD20A1;ANKRD20A2;ANKRD20A4	S	394	EKKQPQVKEGNNTNKSEKIQLSENICDSTSS	1
Q5VUR7	Ankyrin repeat domain-containing protein 20A3;Ankyrin repeat domain-containing protein 20A1;Ankyrin repeat domain-containing protein 20A2;Ankyrin repeat domain-containing protein 20A4	ANKRD20A3;ANKRD20A1;ANKRD20A2;ANKRD20A4	T	391	ERSEKKQPQVKEGNNTNKSEKIQLSENICDS	1
Q9UPS8	Ankyrin repeat domain-containing protein 26	ANKRD26	S	630	KSTEKEKRTSKESVNSPVFGKASLLTGGLLQ	1
Q9BXX3	Ankyrin repeat domain-containing protein 30A	ANKRD30A	Y	204	EFLLIKNANANAVNKYKCTALMLAVCHGSSE	1
Q6NXT1	Ankyrin repeat domain-containing protein 54	ANKRD54	S	63	GGGAGLSGRASGGAQSPLRYLHVLWQQDAEP	1
Q92625	Ankyrin repeat and SAM domain-containing protein 1A	ANKS1A	S	663	LSNCSIGKKRLEKSPSFASEWDEIEKIMSSI	0.999987
Q9H8Y5	Ankyrin repeat and zinc finger domain-containing protein 1	ANKZF1	S	398	KICRDEKEALGQNEESPKQGSGSEGEDGFQV	1
Q9NQW6	Actin-binding protein anillin	ANLN	S	323	SCEGQNPELLPKTPISPLKTGVSKPIVKSTL	0.999999
P39687	Acidic leucine-rich nuclear phosphoprotein 32 family member A	ANP32A	S	27	RNRTPSDVKELVLDNSRSNEGKLEGLTDEFE	1
P39687	Acidic leucine-rich nuclear phosphoprotein 32 family member A;Acidic leucine-rich nuclear phosphoprotein 32 family member D	ANP32A;ANP32D	T	15	_MEMGRRIHLELRNRTPSDVKELVLDNSRSN	0.999986
Q92688	Acidic leucine-rich nuclear phosphoprotein 32 family member B	ANP32B	T	244	EEEEEGGKGEKRKRETDDEGEDD________	1
Q9BXS5	AP-1 complex subunit mu-1	AP1M1	T	223	PELRLGLNDKVLFDNTGRGKSKSVELEDVKF	1
O00203	AP-3 complex subunit beta-1	AP3B1	S	276	KEGDELEDNGKNFYESDDDQKEKTDKKKKPY	0.999998
Q99767	Amyloid beta A4 precursor protein-binding family A member 2	APBA2	S	283	IKASCSPSRHEARPKSLNLLPEAKHPGDPQR	1
P13798	Acylamino-acid-releasing enzyme	APEH	S	187	KAESFFQTKALDVSASDDEIARLKKPDQAIK	0.999835
Q9BZZ5	Apoptosis inhibitor 5	API5	S	464	VEIGQKRASEDTTSGSPPKKSSAGPKRDARQ	0.988532
Q96GX9	Methylthioribulose-1-phosphate dehydratase	APIP	S	87	DMFVCDINEKDISGPSPSKKLKKSQCTPLFM	0.987978
Q0VD83	Apolipoprotein B receptor	APOBR	S	413	WVLEEEGDEEREAEVSPFPKQPQVLGTERTE	1
Q0VD83	Apolipoprotein B receptor	APOBR	T	563	SVTKGQGPELMGGAQTPTKQPEEREAGEVEL	0.999086
Q9Y6D6	Brefeldin A-inhibited guanine nucleotide-exchange protein 1	ARFGEF1	S	52	CEVALEEIKAETEKQSPPHGEAKAGSSTLPP	1
Q07960	Rho GTPase-activating protein 1	ARHGAP1	S	51	DEMPDFPKSDDSKSSSPELVTHLKWDDPYYD	0.989255
Q07960	Rho GTPase-activating protein 1	ARHGAP1	S	51	DEMPDFPKSDDSKSSSPELVTHLKWDDPYYD	0.989255
Q8IWW6	Rho GTPase-activating protein 12	ARHGAP12	S	592	QAVETDEGIEEEIPDSPGIEKHDKEKEQKDP	0.999911
Q53QZ3	Rho GTPase-activating protein 15	ARHGAP15	S	43	IKNANSHHDRLSQSKSMILTDVGKVTEPISR	1
Q68EM7-2	Rho GTPase-activating protein 17	ARHGAP17	S	497	PASMAVMEGDLVKKESPPKPKDPVSAAVPAP	1
P42331	Rho GTPase-activating protein 25	ARHGAP25	S	362	RDHEVLFPKSKDIPLSPPAQKNDPKKAPVAR	1
P42331	Rho GTPase-activating protein 25	ARHGAP25	S	533	ALSSQACDSKGDTLASPNSETGPGKKNSGEE	0.999999
E9PNT2	Rho GTPase-activating protein 27	ARHGAP27	S	582	RQFIAAIKLQDQARRSRCVRDLVRSLPAPNH	1
E9PNT2	Rho GTPase-activating protein 27	ARHGAP27	S	266	SIHKSSQDGDTPAQASPPEEKTKTLDKAGVL;SIHKSSQDGDTPAQASPPEEKVPAELDEVGS	0.999602
A7KAX9	Rho GTPase-activating protein 32	ARHGAP32	S	892	SSKPSSFTEKVVYAFSPKIGRKLSKSPSMSI	0.999997
M0QZR4	Rho guanine nucleotide exchange factor 1	ARHGEF1	S	919	GPPRDGDGVPGGGPLSPARTQEIQENLLSLE	1
M0QZR4	Rho guanine nucleotide exchange factor 1	ARHGEF1	S	842	PKPRPSPSSTREPLLSSSENGNGGRETSPAD	0.826561
Q92974	Rho guanine nucleotide exchange factor 2	ARHGEF2	S	932	SVHRNFEDRERQELGSPEERLQDSSDPDTGS	1
Q92974	Rho guanine nucleotide exchange factor 2	ARHGEF2	S	174	FNDESPLGLRRILSQSTDSLNMRNRTLS___;FNDESPLGLRRILSQSTDSLNMRNRTLSVES	0.878421
Q92974	Rho guanine nucleotide exchange factor 2	ARHGEF2	S	174	FNDESPLGLRRILSQSTDSLNMRNRTLS___;FNDESPLGLRRILSQSTDSLNMRNRTLSVES	0.878421
Q92974	Rho guanine nucleotide exchange factor 2	ARHGEF2	S	956	SDPDTGSEEEGSSRLSPPHSPRDFTRMQDIP;SDPDTGSEEEGSSRLSPPHSPRGETLAETWT	1
Q92974	Rho guanine nucleotide exchange factor 2	ARHGEF2	S	960	TGSEEEGSSRLSPPHSPRDFTRMQDIPEETE;TGSEEEGSSRLSPPHSPRGETLAETWTRDFT	1
Q8TER5	Rho guanine nucleotide exchange factor 40	ARHGEF40	S	419	DKEDASHQEALGNLPSPSEHKLPECHLVKEE	0.913181
Q15052	Rho guanine nucleotide exchange factor 6	ARHGEF6	S	684	SANFQQGHGSSTRKDSIPQVLLPEEEKLIIE	1
Q15052	Rho guanine nucleotide exchange factor 6	ARHGEF6	S	225	PSNYVREIKSSERPLSPKAVKGFETAPLTKN	1
Q15052	Rho guanine nucleotide exchange factor 7;Rho guanine nucleotide exchange factor 6	ARHGEF7;ARHGEF6	S	488	LFPNVLLMLSASPRMSGFIYQGKLPTTGMTI;LFSNVLIMLSASPRMSGFIYQGKIPIAGTVV	1
O14497	AT-rich interactive domain-containing protein 1A	ARID1A	S	696	FSPHTSPHLPGIRGPSPSPVGSPASVAQSRS	0.999921
O14497	AT-rich interactive domain-containing protein 1A	ARID1A	S	1604	APLPRPMENRTSPSKSPFLHSGMKMQKAGPP	1
O14497	AT-rich interactive domain-containing protein 1A	ARID1A	S	1755	GQRTLLDPGRFSKVSSPAPMEGGEEEEELLG	0.992179
O14497	AT-rich interactive domain-containing protein 1A	ARID1A	T	1888	PCPPAPRKHVTTAEGTPGTTDQEGPPPDGPP	0.991901
Q8NFD5	AT-rich interactive domain-containing protein 1B	ARID1B	S	1559	ASFQRSLENRMSPSKSPFLPSMKMQKVMPTV	0.999998
Q99856	AT-rich interactive domain-containing protein 3A	ARID3A	S	101	PGSEEEDAAREGTPGSPGRGREGPGEEHFED	0.999712
P29374	AT-rich interactive domain-containing protein 4A	ARID4A	S	864	CVKEKKLKRKILGQSSPEKKIRIENGMEMTN	0.918444
Q4LE39	AT-rich interactive domain-containing protein 4B	ARID4B	S	790	VSKSPERLRKDIEVLSEDTDYEEDEVTKKRK	0.999409
Q4LE39	AT-rich interactive domain-containing protein 4B	ARID4B	S	1184	PVKSVSTGMKSHSTKSPARTQSPGKCGKNGD	0.999989
Q4LE39	AT-rich interactive domain-containing protein 4B	ARID4B	S	1190	TGMKSHSTKSPARTQSPGKCGKNGDKDPDLK	0.934637
Q4LE39	AT-rich interactive domain-containing protein 4B	ARID4B	T	793	SPERLRKDIEVLSEDTDYEEDEVTKKRKDVK	0.993277
Q66PJ3	ADP-ribosylation factor-like protein 6-interacting protein 4	ARL6IP4	S	332	QVEALPGPSLDQWHRSAGEEEDGPVLTDEQK	1
Q8N6S5	ADP-ribosylation factor-like protein 6-interacting protein 6	ARL6IP6	S	80	SEPRKRSVLPPDGNGSPVLPDKRNGIFPAAA	1
Q8N2F6-2	Armadillo repeat-containing protein 10	ARMC10	S	45	GRRRGDRELGIRSSKSAEDLTDGSYDDVLNA	1
P49407	Beta-arrestin-1	ARRB1	S	412	KGMKDDKEEEEDGTGSPQLNNR_________	0.999897
Q9ULH1	Arf-GAP with SH3 domain, ANK repeat and PH domain-containing protein 1	ASAP1	S	1041	LSPNVQSRDAIQKQASEDSNDLTPTLPETPV	0.844308
Q9ULH1	Arf-GAP with SH3 domain, ANK repeat and PH domain-containing protein 1	ASAP1	S	843	PPPPPGHKRTLSDPPSPLPHGPPNKGAVPWG	0.99998
Q9Y576	Ankyrin repeat and SOCS box protein 1	ASB1	S	6	__________MAEGGSPDGRAGPGSAGRNLK	0.999989
Q8N3C0	Activating signal cointegrator 1 complex subunit 3	ASCC3	S	2195	TQASLSAQVNTKVSDSLTDLALK________	0.998077
Q9Y294	Histone chaperone ASF1A	ASF1A	S	166	INWEDNTEKLEDAESSNPNLQSLLSTDALPS	0.848296
Q8IZT6	Abnormal spindle-like microcephaly-associated protein	ASPM	S	367	HLESTIAHEIYQKILSPDSFIKDNYGLNQDL	0.999975
Q9NVM9	Protein asunder homolog	ASUN	S	626	KEELAEAEIIKDSPDSPEPPNKKPLVEMDET	1
Q76L83	Putative Polycomb group protein ASXL2	ASXL2	S	440	VVSQSECKEEALQMSSPGRKEECESQGEVQP	0.90936
Q76L83	Putative Polycomb group protein ASXL2	ASXL2	S	395	QSSGLSLEDSKKLTASPSDPKVKKTPAEQPK	0.97888
Q9ULI0	ATPase family AAA domain-containing protein 2B	ATAD2B	S	1314	GDKCSSEQKILLEDQSKEKPETSTENHGDDL	1
Q9ULI0	ATPase family AAA domain-containing protein 2B	ATAD2B	S	1347	LEALECSNNEKLEPGSDVEVKDAELDKEGAS	1
Q9NVI7-2	ATPase family AAA domain-containing protein 3A	ATAD3A	S	584	MCWLKAEGPGRGDEPSPS_____________	0.991496
Q96QE3	ATPase family AAA domain-containing protein 5	ATAD5	S	817	KAQKAADPVPSFDESSQDTSEKSQDCDVQCK	0.932933
P17544-2	Cyclic AMP-dependent transcription factor ATF-7	ATF7	T	101	EKKAAAGPLDMSLPSTPDIKIKEEEPVEEVT	0.88176
Q6VMQ6	Activating transcription factor 7-interacting protein 1	ATF7IP	S	496	QESSESLPKEAFLVLSDEEDISGEKDESEVI	0.999996
Q6VMQ6	Activating transcription factor 7-interacting protein 1	ATF7IP	S	477	ETNPDLEEKMESSFGSPSKQESSESLPKEAF	0.933487
Q6VMQ6	Activating transcription factor 7-interacting protein 1	ATF7IP	S	673	EDLKKRHEHPPNPPVSPGKTVNDVNSNNNMS	1
Q6VMQ6	Activating transcription factor 7-interacting protein 1	ATF7IP	S	559	RPSEKNEFSRRKRSKSEDMDNVQSKRRRYME	1
Q8NAA4	Autophagy-related protein 16-2	ATG16L2	S	304	DVVKGLLDFKKRRGHSIGGAPEQRYQIIPVC	1
Q96BY7	Autophagy-related protein 2 homolog B	ATG2B	S	255	SPVCSTAPVETEPKLSPSWNPKIIYEPHPQL	0.995339
P54259	Atrophin-1	ATN1	S	645	TASPPGPPPYGKRAPSPGAYKTATPPGYKPG	0.999939
P54259	Atrophin-1	ATN1	S	739	TQIKQEPAEEYETPESPVPPARSPSPPPKVV	0.94296
P54259	Atrophin-1	ATN1	S	746	AEEYETPESPVPPARSPSPPPKVVDVPSHAS	0.999344
P54259	Atrophin-1	ATN1	S	748	EYETPESPVPPARSPSPPPKVVDVPSHASQS	0.999851
Q5TC04	Putative uncharacterized protein ATP1A1-AS1	ATP1A1-AS1	S	19	FKDDLQTNVEIIPGESAPRKESPRPPAPPSS	1
Q5TC04	Putative uncharacterized protein ATP1A1-AS1	ATP1A1-AS1	T	10	______MAHFKDDLQTNVEIIPGESAPRKES	1
Q9NW81	ATP synthase subunit s-like protein	ATP5SL	S	253	EGLKSGPEEQPRDTASPVPA___________	0.778459
Q8TF62	Probable phospholipid-transporting ATPase IM;Phospholipid-transporting ATPase	ATP8B4	S	437	DQKTEITQEKEPVDFSVKSQADREFQFFDHH	1
P46100	Transcriptional regulator ATRX	ATRX	S	1061	SKKIRDKTSKKKDELSDYAEKSTGKGDSCDS	0.999997
P46100	Transcriptional regulator ATRX	ATRX	S	1527	REREKLREVIEIEDASPTKCPITTKLVLDED	0.99373
P46100	Transcriptional regulator ATRX	ATRX	S	598	TKELYVKLTPVSLSNSPIKGADCQEVPQDKD	0.999264
P46100	Transcriptional regulator ATRX	ATRX	S	1348	KPRYRHRLLRHKLTVSDGESGEEKKTKPKEH	0.999952
P46100	Transcriptional regulator ATRX	ATRX	S	1996	LKLEESKATSSSNPSSPAPDWYKDFVTDADA	0.984208
P46100	Transcriptional regulator ATRX	ATRX	S	1348	KPRYRHRLLRHKLTVSDGESGEEKKTKPKEH	0.999952
P46100	Transcriptional regulator ATRX	ATRX	S	1352	RHRLLRHKLTVSDGESGEEKKTKPKEHKEVK	1
Q8WWM7	Ataxin-2-like protein	ATXN2L	S	594	KEKEVDGLLTSEPMGSPVSSKTESVSDKEDK	0.983026
Q8WWM7	Ataxin-2-like protein	ATXN2L	S	111	IGSARGQSTGKGPPQSPVFEGVYNNSRMLHF	1
Q9H6S1	5-azacytidine-induced protein 2	AZI2	S	357	NSLEDNSWVFPSPPKSSETAFGETKTKTLPL	0.825875
Q6L9W6	Beta-1,4-N-acetylgalactosaminyltransferase 3	B4GALNT3	S	685	ALEVTRVFLKKLNQRSRGRYQLQRIVNVEKR	0.995426
P46379	Large proline-rich protein BAG6	BAG6;BAT3	S	973	QGAERASPEPQRENASPAPGTTAEEAMSRGP	1
P46379	Large proline-rich protein BAG6	BAG6;BAT3	S	964	PLPEEPMEVQGAERASPEPQRENASPAPGTT	1
Q9P281	BAH and coiled-coil domain-containing protein 1;Trinucleotide repeat-containing gene 18 protein	BAHCC1;TNRC18	S	2217	AGGEFLVKLDHEGVTSPKNKTCKALLMGDKD;EEAELLVKLDHEGVTSPKSKKAKEALLLRED	0.805031
Q9UQB8	Brain-specific angiogenesis inhibitor 1-associated protein 2	BAIAP2	S	325	YSPWADRKAAQPKSLSPPQSQSKLSDSYSNT	0.999575
Q9UQB8	Brain-specific angiogenesis inhibitor 1-associated protein 2	BAIAP2	S	454	GSDRLHMSLQQGKSSSTGNLLDKDDLAIPPP	0.993575
P80723	Brain acid soluble protein 1	BASP1	T	36	EKDKKAEGAATEEEGTPKESEPQAAAEPAEA	1
Q9NRL2	Bromodomain adjacent to zinc finger domain protein 1A	BAZ1A	S	1402	QSRSVNIASKLSLQESESKRRCRKRQSPEPS	0.833998
Q9NRL2	Bromodomain adjacent to zinc finger domain protein 1A	BAZ1A	S	1413	SLQESESKRRCRKRQSPEPSPVTLGRRSSGR	0.999696
Q9NRL2	Bromodomain adjacent to zinc finger domain protein 1A	BAZ1A	T	731	ESKDTEQKELDQDMVTEDEDDPGSHKRGRRG	1
Q9UIG0	Tyrosine-protein kinase BAZ1B	BAZ1B	S	349	PKLWCHVHLKKSLSGSPLKVKNSKNSKSPEE	0.999616
Q9UIG0	Tyrosine-protein kinase BAZ1B	BAZ1B	S	361	LSGSPLKVKNSKNSKSPEEHLEEMMKMMSPN	1
Q9UIF9	Bromodomain adjacent to zinc finger domain protein 2A	BAZ2A	S	509	KASPVTSPAAAFPTASPANKDVSSFLETTAD	0.99482
Q9UIF9	Bromodomain adjacent to zinc finger domain protein 2A	BAZ2A	S	1770	EGDGRRRRVLLRGRESPAAGPRYSEEGLSPS	1
Q9UIF9	Bromodomain adjacent to zinc finger domain protein 2A	BAZ2A	S	1397	LAPKRRAGDPGEMPQSPTGLGQPKRRGRPPS	0.975906
Q9UIF9	Bromodomain adjacent to zinc finger domain protein 2A	BAZ2A	S	1783	RESPAAGPRYSEEGLSPSKRRRLSMRNHHSD	0.880942
Q9BXK5	Bcl-2-like protein 13	BCL2L13	S	426	EKEINAREESLVEELSPASEKKPVPPSEGKS	0.97449
P20749	B-cell lymphoma 3 protein	BCL3	S	41	PGAALPLRKRPLRAPSPEPAAPRGAAGLVVP	1
P41182	B-cell lymphoma 6 protein	BCL6	S	333	PPNAPLNRKGLVSPQSPQKSDCQPNSPTESC	1
Q9NYF8	Bcl-2-associated transcription factor 1	BCLAF1	S	177	QEKQTKKAEGEPQEESPLKSKSQEEPKDTFE	1
Q9NYF8	Bcl-2-associated transcription factor 1	BCLAF1	S	512	PEQVKSEKLKDLFDYSPPLHKNLDAREKSTF	1
Q9NYF8	Bcl-2-associated transcription factor 1	BCLAF1	S	198	SQEEPKDTFEHDPSESIDEFNKSSATSGDIW	0.99896
Q9NYF8	Bcl-2-associated transcription factor 1	BCLAF1	S	496	EDKNSERITVKKETQSPEQVKSEKLKDLFDY	1
Q9NYF8	Bcl-2-associated transcription factor 1	BCLAF1	S	397	DYFSDKESGKQKFNDSEGDDTEETEDYRQFR	1
Q9NYF8	Bcl-2-associated transcription factor 1	BCLAF1	S	385	RAEGEWEDQEALDYFSDKESGKQKFNDSEGD	1
Q9NYF8	Bcl-2-associated transcription factor 1	BCLAF1	S	161	SSSPYSKSPVSKRRGSQEKQTKKAEGEPQEE	1
Q9NYF8	Bcl-2-associated transcription factor 1	BCLAF1	S	531	HKNLDAREKSTFREESPLRIKMIASDSHRPE	0.999999
Q9NYF8	Bcl-2-associated transcription factor 1	BCLAF1	S	648	TSYQKATEEHSTRQKSPEIHRRIDISPSTLR	0.999963
Q9NYF8	Bcl-2-associated transcription factor 1	BCLAF1	S	658	STRQKSPEIHRRIDISPSTLRKHTRLAGEER	0.98851
Q9Y2W1	Bcl-2-associated transcription factor 1;Thyroid hormone receptor-associated protein 3	BCLAF1;THRAP3	T	874	DFQKRNREEEWDPEYTPKSKKYYLHDDREGE;TFQKRPKEEEWDPEYTPKSKKYFLHDDRDDG	0.999975
Q6W2J9	BCL-6 corepressor	BCOR	S	423	GHARKTAVQDRKDGSSPPLLEKQTVTKDVTD	0.94572
A6H8Y1	Transcription factor TFIIIB component B'' homolog	BDP1	S	938	EEIDKDLEEAGRREISPQKNGPEEVKPLGEV	1
A6H8Y1	Transcription factor TFIIIB component B'' homolog	BDP1	T	915	TGLKAMGREICLREKTPEVIDATEEIDKDLE	1
A6H8Y1	Transcription factor TFIIIB component B'' homolog	BDP1	T	970	TDLKATGNESSPREKTPEVTDATEEIDKNLE	0.999948
Q9NYM9	BET1-like protein	BET1L	S	9	_______MADWARAQSPGAVEEILDRENKRM	1
Q9UBW5	Bridging integrator 2	BIN2	S	458	GSPTSPRASLGTGTASPRTSLEVSPNPEPPE	0.995313
Q6QNY0	Biogenesis of lysosome-related organelles complex 1 subunit 3	BLOC1S3	S	65	RPTGLRVAGEAAETDSEPEPEPEPTAAPRDL	0.99987
Q6QNY0	Biogenesis of lysosome-related organelles complex 1 subunit 3	BLOC1S3	T	63	RGRPTGLRVAGEAAETDSEPEPEPEPTAAPR	0.99987
Q12982	BCL2/adenovirus E1B 19 kDa protein-interacting protein 2	BNIP2	S	114	DDLPKPKTTEVIRKGSITEYTAAEEKEDGRR	0.925403
Q8NFC6	Biorientation of chromosomes in cell division protein 1-like 1	BOD1L1	S	2932	DESNKETANLQERSISNDDGEEKIVTSVRRR	0.807902
Q8NFC6	Biorientation of chromosomes in cell division protein 1-like 1	BOD1L1	S	2973	SDDAESSEPERKRQKSVSDPVEDKKEQESDE	0.986758
H0Y9Y2		BOD1L1	S	164	KLAKEKLPTSEKVSNSPPLGRSKTQLSPSIK	0.997711
Q8NFC6	Biorientation of chromosomes in cell division protein 1-like 1	BOD1L1	S	1531	SVATSTEGKDKDVTLSPVKAGPATTTSSETR	0.999994
Q8NFC6	Biorientation of chromosomes in cell division protein 1-like 1	BOD1L1	S	2815	RQCPETEPHDTKEENSRDLEELPKTSSETNS	1
Q8NFC6	Biorientation of chromosomes in cell division protein 1-like 1	BOD1L1	S	538	AEKTKSSKTKGQGRSSVDLEESSTKSLEPKA	0.863686
Q8NFC6	Biorientation of chromosomes in cell division protein 1-like 1	BOD1L1	T	1354	KTSDSKEGGEGFTVDTPAKASITSKRHIPEA	0.999786
Q12830	Nucleosome-remodeling factor subunit BPTF	BPTF	S	1300	KLYPKDRVLDDVSIRSPETKCPKQNSIENDI	0.805075
Q12830	Nucleosome-remodeling factor subunit BPTF	BPTF	S	2370	STTAAGTGEQRQSKLSPQMQVHQDKTLPPAQ	1
Q12830	Nucleosome-remodeling factor subunit BPTF	BPTF	S	1231	GIGKTSTNSSKNLSESPVITKAKEGCQSDSM	0.996584
Q12830	Nucleosome-remodeling factor subunit BPTF	BPTF	S	1310	DVSIRSPETKCPKQNSIENDIEEKVSDLASR	1
Q12830	Nucleosome-remodeling factor subunit BPTF	BPTF	S	2098	SVTTGTKMVLTTKVGSPATVTFQQNKNFHQT	0.999998
H7C560		BRAF	T	361	FQTEDFSLYACASPKTPIQAGGYGEFAAFK_	1
P38398	Breast cancer type 1 susceptibility protein	BRCA1	S	1164	TPDDLLDDGEIKEDTSFAENDIKESSAVFSK	0.87192
O95696-2	Bromodomain-containing protein 1	BRD1	S	906	VSPPKSAKNTETQPTSPQLGTKTFLSVVLPR	0.893664
P25440	Bromodomain-containing protein 2	BRD2	S	298	ADTTTPTPTAILAPGSPASPPGSLEPKAARL	0.9963
P25440	Bromodomain-containing protein 2	BRD2	S	301	TTPTPTAILAPGSPASPPGSLEPKAARLPPM	0.943653
P25440	Bromodomain-containing protein 2	BRD2	S	298	ADTTTPTPTAILAPGSPASPPGSLEPKAARL	0.9963
P25440	Bromodomain-containing protein 2	BRD2	S	301	TTPTPTAILAPGSPASPPGSLEPKAARLPPM	0.943653
O60885	Bromodomain-containing protein 4	BRD4	S	469	FAKMPDEPEEPVVAVSSPAVPPPTKVVAPPS	0.752776
O60885	Bromodomain-containing protein 4	BRD4	S	470	AKMPDEPEEPVVAVSSPAVPPPTKVVAPPSS	0.83389
O60885	Bromodomain-containing protein 4	BRD4	S	601	KEPAPMKSKPPPTYESEEEDKCKPMSYEEKR	0.967641
Q9H0E9-2	Bromodomain-containing protein 8	BRD8	S	460	FRSGVAEAPVGSKAPSIDGKEELDLAEKMDI	1
Q9H0E9-2	Bromodomain-containing protein 8	BRD8	S	683	DPLEAETQHKFEMSDSLKEESGTIFGSQIKD	0.971091
Q9H0E9-2	Bromodomain-containing protein 8	BRD8	T	264	VTDDSPQKKMLGQKATPPPSPLLSELLKKGS	0.999997
Q9HCU9	Breast cancer metastasis-suppressor 1	BRMS1	S	237	ILEDWTAIKKARAAVSPQKRKSDGP______	1
Q5PSV4	Breast cancer metastasis-suppressor 1-like protein	BRMS1L	S	197	WNDELQSRKKRKDPFSPDKKKPVVVSGPYIV	1
Q9NW68	BSD domain-containing protein 1	BSDC1	S	387	SDSGKSTPSNNGKKGSSTDISEDWEKDFDLD	0.818583
P35613	Basigin	BSG	S	362	KRRKPEDVLDDDDAGSAPLKSSGQHQNDKGK	1
P62324	Protein BTG1	BTG1	S	159	DSRISCKEELLLGRTSPSKNYNMMTVSG___	0.790906
Q9BRD0	BUD13 homolog	BUD13	S	358	DSKGDCQKATDSDLSSPRHKQSPGHQDSDSD	0.888104
Q9BRD0	BUD13 homolog	BUD13	S	325	LSFPKNSKYEYDPDISPPRKKQAKSHFGDKK	1
Q9BRD0	BUD13 homolog	BUD13	S	197	HDSSDTSPPRRARHDSPDPSPPRRPQHNSSG	1
Q9BRD0	BUD13 homolog	BUD13	S	201	DTSPPRRARHDSPDPSPPRRPQHNSSGASPR	1
Q8N655	Uncharacterized protein C10orf12	C10orf12	S	273	PSKEITSHEEGGGDVSPRKEPQEPEVCPTKI	0.999861
Q6ZUT1	Uncharacterized protein C11orf57	C11orf57	S	137	ETDSDQQDITNGKKTSPQVKSSTHESRKHKK	0.998171
Q9BUA3	Uncharacterized protein C11orf84	C11orf84	S	308	PKDREVAEGGLPRAESPSPAPPPGLRGTLDL	0.999105
Q8N5I9	Uncharacterized protein C12orf45	C12orf45	S	178	LPNSEGGKGKIEVLDSPASKKKK________	0.985949
F8VQD4	Overexpressed in colon carcinoma 1 protein	C12orf75;OCC1	S	28	AGQGPAGAAKDVTEESVTEDDKRRNYGGVYV	0.971845
Q8IXM2-3	Chromatin complexes subunit BAP18	C17orf49;BAP18;RNASEK-C17orf49	S	96	KRKVYEDSGIPLPAESPKKGPKKVASGVLSP	1
Q53F19	Uncharacterized protein C17orf85	C17orf85	S	415	DEMDYDLELKMISTPSPKKSMKMTMYADEVE	0.998997
Q53F19	Uncharacterized protein C17orf85	C17orf85	S	500	STKSDIRQRLGKRPHSPEKAFSSNPVVRREP	1
Q9NUL5	UPF0515 protein C19orf66	C19orf66	S	2	______________MSQEGVELEKSVRRLRE	1
Q8N6N3	UPF0690 protein C1orf52	C1orf52	S	158	AKKARLLPEGEETLESDDEKDEHTSKKRKVE	0.999999
Q86YS7	C2 domain-containing protein 5	C2CD5	S	297	GPSTPLKNQTYSFSPSKSYSRQSSSSDTDLS	0.809926
Q86YS7	C2 domain-containing protein 5	C2CD5	T	285	FNEDPNPNTHSSGPSTPLKNQTYSFSPSKSY	0.762555
Q9BVC5	Ashwin	C2orf49	S	189	NHDLTHRKSPSGPVKSPPLSPVGTTPVKLKR	1
Q9BVC5	Ashwin	C2orf49	S	189	NHDLTHRKSPSGPVKSPPLSPVGTTPVKLKR	1
Q9BVC5	Ashwin	C2orf49	S	193	THRKSPSGPVKSPPLSPVGTTPVKLKRAAPK	0.997869
Q9H6K1	Uncharacterized protein C6orf106	C6orf106	S	215	TQPHRKVEGNFNPFASPQKNRQSDENNLKDP	1
Q9BUH6	Protein PAXX	C9orf142	S	148	WSLERRLAAAEETAVSPRKSPRPAGPQLFLP	0.99959
Q8IXQ3	Uncharacterized protein C9orf40	C9orf40	S	69	RKRKIDAGTMAEPSASPSKRRDSGDNSAPSG	0.907376
P27708	CAD protein;Glutamine-dependent carbamoyl-phosphate synthase;Aspartate carbamoyltransferase;Dihydroorotase	CAD	S	1859	LPDGRFHLPPRIHRASDPGLPAEEPKEKSSR	1
Q13137-4	Calcium-binding and coiled-coil domain-containing protein 2	CALCOCO2	T	297	LEQLKKENDHLFLSLTEQRKDQKKLEQTVEQ	0.978835
P62158	Calmodulin	CALM1;CALM2;CALM3	T	6	__________MADQLTEEQIAEFKEAFSLFD	1
O43852	Calumenin	CALU	S	44	HHEPQLSDKVHNDAQSFDYDHDAFLGAEEAK	0.981289
Q13557-12	Calcium/calmodulin-dependent protein kinase type II subunit delta	CAMK2D	S	330	SAAKSLLKKPDGVKESTESSNTTIEDEDVKA	0.873575
Q13557-12	Calcium/calmodulin-dependent protein kinase type II subunit delta	CAMK2D	T	337	KKPDGVKESTESSNTTIEDEDVKARKQEIIK	0.794567
Q13557-12	Calcium/calmodulin-dependent protein kinase type II subunit delta	CAMK2D	T	337	KKPDGVKESTESSNTTIEDEDVKARKQEIIK	0.794567
Q5T5Y3	Calmodulin-regulated spectrin-associated protein 1	CAMSAP1	S	1080	QDHKVKAPVHFVEPLSPTGVAGHRKAPRLGQ	0.914417
P27824	Calnexin	CANX	S	554	DEEEEGEEKLEEKQKSDAEEDGGTVSQEEED	1
P27824	Calnexin	CANX	S	564	EEKQKSDAEEDGGTVSQEEEDRKPKAEEDEI	0.999855
P27824	Calnexin	CANX	T	562	KLEEKQKSDAEEDGGTVSQEEEDRKPKAEED	0.996273
P27824	Calnexin	CANX	S	554	DEEEEGEEKLEEKQKSDAEEDGGTVSQEEED	1
P27824	Calnexin	CANX	S	564	EEKQKSDAEEDGGTVSQEEEDRKPKAEEDEI	0.999855
Q01518-2	Adenylyl cyclase-associated protein 1;Adenylyl cyclase-associated protein	CAP1	S	90	VHTGLKLERALLVTASQCQQPAENKLSDLLA	0.981749
P52907	F-actin-capping protein subunit alpha-1	CAPZA1	S	9	_______MADFDDRVSDEEKVRIAAKFITHA	1
P47755	F-actin-capping protein subunit alpha-2	CAPZA2	S	9	_______MADLEEQLSDEEKVRIAAKFIIHA	1
B1AK87	F-actin-capping protein subunit beta	CAPZB	T	190	MNLGGSLTRQMEKDETVSDCSPHIANIGRLV	0.89574
Q9Y2V2	Calcium-regulated heat stable protein 1	CARHSP1	S	30	QASVGLLDTPRSRERSPSPLRGNVVPSPLPT	1
Q9Y2V2	Calcium-regulated heat stable protein 1	CARHSP1	S	41	SRERSPSPLRGNVVPSPLPTRRTRTFSATVR	0.987264
Q9Y2V2	Calcium-regulated heat stable protein 1	CARHSP1	S	30	QASVGLLDTPRSRERSPSPLRGNVVPSPLPT	1
Q9Y2V2	Calcium-regulated heat stable protein 1	CARHSP1	S	32	SVGLLDTPRSRERSPSPLRGNVVPSPLPTRR	1
O15234	Protein CASC3	CASC3	S	148	EEKPDTKSTVTGERQSGDGQESTEPVENKVG	0.994885
Q6P4E1	Protein CASC4	CASC4	S	233	PKVAENVADKNEEPSSNHIPHGKEQIKRGGD	0.910089
Q8WXD9	Caskin-1	CASKIN1	S	1257	SPTPTSKKVPLPGPGSPEVKRAHGTPPPVSP	1
Q92851-6	Caspase-10;Caspase-10 subunit p23/17;Caspase-10 subunit p12	CASP10	T	198	RNIEKYKREKAIQIVTPPVDKEAESYQGEEE	1
Q9UKL3	CASP8-associated protein 2	CASP8AP2	S	567	KDLKLSFMKKLNLTLSPAKKQPVSQDNQHKI	0.999872
O75081	Protein CBFA2T3	CBFA2T3	S	65	PAPVDRKAKASAMPDSPAEVKTQPRSTPPSM	0.999834
Q13951-2	Core-binding factor subunit beta	CBFB	S	173	RSHREEMEARRQQDPSPGSNLGGGDDLKLR_	0.999976
Q13185	Chromobox protein homolog 3	CBX3	S	95	QKAGKEKDGTKRKSLSDSESDDSKSKKKRDA	0.999829
Q13185	Chromobox protein homolog 3	CBX3	S	93	NSQKAGKEKDGTKRKSLSDSESDDSKSKKKR	1
Q13185	Chromobox protein homolog 3	CBX3	S	95	QKAGKEKDGTKRKSLSDSESDDSKSKKKRDA	0.999829
Q8N163	Cell cycle and apoptosis regulator protein 2	CCAR2	S	678	FAGAKLEDSEVRSVASNQSEMEFSSLQDMPK	0.999039
Q8N163	Cell cycle and apoptosis regulator protein 2	CCAR2	S	569	YRVYKMLLSLPEKVVSPPEPEKEEAAKEEAT	1
Q8N163	Cell cycle and apoptosis regulator protein 2	CCAR2	S	675	EEEFAGAKLEDSEVRSVASNQSEMEFSSLQD	0.996206
Q8N163	Cell cycle and apoptosis regulator protein 2	CCAR2	S	678	FAGAKLEDSEVRSVASNQSEMEFSSLQDMPK	0.999039
Q8N163	Cell cycle and apoptosis regulator protein 2	CCAR2	S	681	AKLEDSEVRSVASNQSEMEFSSLQDMPKELD	0.999852
Q96JG6	Coiled-coil domain-containing protein 132	CCDC132	S	15	_MQKIKSLMTRQGLKSPQESLSDLGAIESLR	0.999981
Q96JG6	Coiled-coil domain-containing protein 132	CCDC132	S	494	SILQLHEFKFMEQSRSPSVSPSKQPVSTSSK	0.768649
Q6PK04	Coiled-coil domain-containing protein 137	CCDC137	S	19	AGRGAAVSRVQAGPGSPRRARGRQQVQPLGK	1
Q96MW1	Coiled-coil domain-containing protein 43	CCDC43	T	139	EKQRKAALLAQYADVTDEEDEADEKDDSGAT	1
Q16204	Coiled-coil domain-containing protein 6	CCDC6	S	244	RILQEKLDQPVSAPPSPRDISMEIDSPENMM	0.998984
Q9Y6R9	Coiled-coil domain-containing protein 61	CCDC61	T	285	KTLTSELALYKRGRRTPPVQPPPTREDRASS	1
Q8N4S0	Coiled-coil domain-containing protein 82	CCDC82	S	131	IKHRNIDLQDQEKHLSQEDNDLNKQTGQIIE	1
Q9H6F5	Coiled-coil domain-containing protein 86	CCDC86	S	47	LVEFESNPEETREPGSPPSVQRAGLGSPERP	0.799374
Q9H6F5	Coiled-coil domain-containing protein 86	CCDC86	S	218	ETVTGGFGAKKRKGSSSQAPASKKLNKEELP	0.90644
Q9H6F5	Coiled-coil domain-containing protein 86	CCDC86	S	18	TPLRRSRRLGGLRPESPESLTSVSRTRRALV	0.998895
A6NC98	Coiled-coil domain-containing protein 88B	CCDC88B	S	1475	PEVQEPEKRPLTPSLSQ______________	0.999999
A6NC98	Coiled-coil domain-containing protein 88B	CCDC88B	T	1471	NREGPEVQEPEKRPLTPSLSQ__________	0.996906
Q9Y3X0	Coiled-coil domain-containing protein 9	CCDC9	S	386	KEGAASPAPETPQPTSPETSPKETPMQPPEI	0.966173
Q9Y3X0	Coiled-coil domain-containing protein 9	CCDC9	S	202	EPNPVRNFLDDPRRRSGPLEESERDRREESR	0.999999
Q9Y3X0	Coiled-coil domain-containing protein 9	CCDC9	S	386	KEGAASPAPETPQPTSPETSPKETPMQPPEI	0.966173
Q9Y3X0	Coiled-coil domain-containing protein 9	CCDC9	S	390	ASPAPETPQPTSPETSPKETPMQPPEIPAPA	0.914424
Q567U6	Coiled-coil domain-containing protein 93	CCDC93	S	305	VSEYAEKQSELSAEESPEKLGTSQLHRRKVI	1
Q9BSQ5	Cerebral cavernous malformations 2 protein	CCM2	S	384	LETIGVKDGRGIITDSFGRHRRALSTTSSST	0.968049
O95067	G2/mitotic-specific cyclin-B2	CCNB2;CCNB2V	S	92	SVKPVQMEKLAPKGPSPTPEDVSMKEENLCQ	0.999905
O75909	Cyclin-K	CCNK	S	329	QQPAQQPKKPSPQPSSPRQVKRAVVVSPKEE	0.788126
O75909	Cyclin-K	CCNK	S	340	PQPSSPRQVKRAVVVSPKEENKAAEPPPPKI	1
O75909	Cyclin-K	CCNK	S	324	QPAQQQQPAQQPKKPSPQPSSPRQVKRAVVV	0.999998
O75909	Cyclin-K	CCNK	S	329	QQPAQQPKKPSPQPSSPRQVKRAVVVSPKEE	0.788126
Q9UK58	Cyclin-L1	CCNL1	S	352	ASKPSSPREVKAEEKSPISINVKTVKKEPED	0.999997
Q96S94	Cyclin-L2	CCNL2	S	369	NTKRRLEGAKKAKADSPVNGLPKGRESRSRS	1
Q96S94	Cyclin-L2	CCNL2	S	330	LLPGGTQVLDGTSGFSPAPKLVESPKEGKGS	0.977085
Q96S94	Cyclin-L2	CCNL2	S	348	PKLVESPKEGKGSKPSPLSVKNTKRRLEGAK	0.986208
Q8ND76	Cyclin-Y-like protein 1;Cyclin-Y	CCNYL1;CCNY	S	73	NPSDHPRASTIFLSKSQTDVREKRKSLFINH;NPSDHPRASTIFLSKSQTDVREKRKSNHLNH	0.957159
O43303	Centriolar coiled-coil protein of 110 kDa	CCP110	S	372	LTGSYAKLPSPEPSMSPKMHRRRSRTSSACH	0.885539
Q9ULG6	Cell cycle progression protein 1	CCPG1	S	186	PSPAFRRRRARKKTVSASESEDRLVAEQETE	0.997061
Q9ULG6	Cell cycle progression protein 1	CCPG1	T	184	NQPSPAFRRRRARKKTVSASESEDRLVAEQE	0.99993
P32246	C-C chemokine receptor type 1	CCR1	S	352	ERVSSTSPSTGEHELSAGF____________	0.995169
P78371	T-complex protein 1 subunit beta	CCT2	S	3	_____________MASLSLAPVNIFKAGADE	0.99957
P78371	T-complex protein 1 subunit beta	CCT2	S	260	DTDKIKIFGSRVRVDSTAKVAEIEHAEKEKM	0.778173
O95400	CD2 antigen cytoplasmic tail-binding protein 2	CD2BP2	S	195	ARGGGKGRKGPGQPSSPQRLDRLSGLADQMV	0.772508
O15446	DNA-directed RNA polymerase I subunit RPA34	CD3EAP	T	287	EQINTEPLEDTVLSPTKKRKRQKGTEGMEPE	0.807369
P16070	CD44 antigen	CD44	S	697	LVINSGNGAVEDRKPSGLNGEASKSQEMVHL	0.99146
P16070	CD44 antigen	CD44	S	706	VEDRKPSGLNGEASKSQEMVHLVNKESSETP	1
Q12834	Cell division cycle protein 20 homolog	CDC20	T	106	ASFLLSKENQPENSQTPTKKEHQKAWALNLN	0.894713
Q8NHZ8	Anaphase-promoting complex subunit CDC26	CDC26	S	42	ETRKKQKEDVEVVGGSDGEGAIGLSSDPKSR	0.999999
Q9H3Q1	Cdc42 effector protein 4	CDC42EP4	S	118	LGSLRDSALFVKNAMSLPQLNEKEAAEKGTS	1
Q99459	Cell division cycle 5-like protein	CDC5L	S	726	AKMEKKMKILLGGYQSRAMGLMKQLNDLWDQ	1
Q69YH5	Cell division cycle-associated protein 2	CDCA2	S	756	AGGQNAENLCQFFKISPDLNIKCERKDDFLG	1
Q96GN5	Cell division cycle-associated 7-like protein	CDCA7L	S	117	VVESDLSDDGKASLVSEEEEDEEEDKATPRR	0.999998
Q53HL2	Borealin	CDCA8	T	106	LDITEINKLTAEAIQTPLKSAKTRKVIQVDE	1
P21127	Cyclin-dependent kinase 11B;Cyclin-dependent kinase 11A	CDK11B;CDC2L1;CDK11A	S	283	EKMEERDLLSDLQDISDSERKTSSAESSSAE	0.982087
P21127	Cyclin-dependent kinase 11B;Cyclin-dependent kinase 11A	CDK11B;CDC2L1;CDK11A	S	589	GILKVGDFGLAREYGSPLKAYTPVVVTLWYR	1
Q9NYV4-2	Cyclin-dependent kinase 12	CDK12	S	423	AAAAAAKMDGKESKGSPVFLPRKENSSVEAK	1
Q9NYV4-2	Cyclin-dependent kinase 12	CDK12	S	1083	KETTSGTSTEPVKNSSPAPPQPAPGKVESGA	0.996989
Q9NYV4-2	Cyclin-dependent kinase 12	CDK12	T	1244	ENNSDKNSGPQGPRRTPTMPQEEAAEKRPPE	0.964919
Q14004	Cyclin-dependent kinase 13	CDK13	S	525	NHVKDVKKIKIEHAPSPSSGGTLKNDKAKTK	0.975152
Q00536	Cyclin-dependent kinase 16	CDK16	S	110	SPVRVRMRNHPPRKISTEDINKRLSLPADIR	0.826451
P06493	Cyclin-dependent kinase 2;Cyclin-dependent kinase 1;Cyclin-dependent kinase 3	CDK2;CDK1;CDC2;CDK3	T	14	__MDMFQKVEKIGEGTYGVVYKAKNRETGQL;__MEDYTKIEKIGEGTYGVVYKGRHKTTGQV;__MENFQKVEKIGEGTYGVVYKARNKLTGEV	1
P06493	Cyclin-dependent kinase 2;Cyclin-dependent kinase 1;Cyclin-dependent kinase 3	CDK2;CDK1;CDC2;CDK3	T	14	__MDMFQKVEKIGEGTYGVVYKAKNRETGQL;__MEDYTKIEKIGEGTYGVVYKGRHKTTGQV;__MENFQKVEKIGEGTYGVVYKARNKLTGEV	1
P06493	Cyclin-dependent kinase 2;Cyclin-dependent kinase 1;Cyclin-dependent kinase 3	CDK2;CDK1;CDC2;CDK3	Y	15	_MDMFQKVEKIGEGTYGVVYKAKNRETGQLV;_MEDYTKIEKIGEGTYGVVYKGRHKTTGQVV;_MENFQKVEKIGEGTYGVVYKARNKLTGEVV	0.999993
Q96SN8	CDK5 regulatory subunit-associated protein 2	CDK5RAP2	S	112	EHIYKTNIELKVEVESLKRELQEREQLLIKA	0.999999
O95674	Phosphatidate cytidylyltransferase 2	CDS2	S	33	DKESESEAKVDGETASDSESRAESAPLPVSA	0.939829
Q92879	CUGBP Elav-like family member 1	CELF1	S	28	LDAIKMFVGQVPRTWSEKDLRELFEQYGAVY	0.980715
P49450	Histone H3-like centromeric protein A	CENPA	S	17	GPRRRSRKPEAPRRRSPSPTPTPGPSRRGPS	0.974154
P49450	Histone H3-like centromeric protein A	CENPA	S	19	RRRSRKPEAPRRRSPSPTPTPGPSRRGPSLG	0.848854
Q03188	Centromere protein C	CENPC	S	225	DDKVMLKKIEIDNKVSDEEDKTSEGQERKPS	1
P49454	Centromere protein F	CENPF	S	3119	ATRTSPRLAAQKLALSPLSLGKENLAESSKP	0.999333
P49454	Centromere protein F	CENPF	S	3150	TAGGSRSQKVKVAQRSPVDSGTILREPTTKS	0.999788
Q96BT3	Centromere protein T	CENPT	S	47	RSARAGARRALLETASPRKLSGQTRTIARGR	0.99577
Q9UPN4	Centrosomal protein of 131 kDa	CEP131	S	114	LMLFEGSPSGKKRPASLSTAPSEKGATWNVL	0.862314
O94986	Centrosomal protein of 152 kDa	CEP152	S	1552	KCNPLMESENAASEKSQGLDVQEPPVKDGGD	1
Q5SW79	Centrosomal protein of 170 kDa	CEP170	S	1112	PTRTSLLRRARLGEASDSELADADKASVASE	0.994771
Q5SW79	Centrosomal protein of 170 kDa	CEP170	S	1160	SRIDLLAQPRRTRLGSLSARSDSEATISRSS	0.991274
Q5SW79	Centrosomal protein of 170 kDa	CEP170	S	488	QEMDKMLKNQATSATSEKDNDDDQSDKGTYT	0.942806
Q5SW79	Centrosomal protein of 170 kDa	CEP170	S	1165	LAQPRRTRLGSLSARSDSEATISRSSASSRT	0.914241
Q5SW79	Centrosomal protein of 170 kDa	CEP170	S	1167	QPRRTRLGSLSARSDSEATISRSSASSRTAE	0.896566
Q5SW79	Centrosomal protein of 170 kDa	CEP170	S	667	EKSLESHRAKVVTQRSEIGEKQDTELQEKET	0.764698
Q9BV73	Centrosome-associated protein CEP250	CEP250	T	1040	SQRLVEQEVQEKLRETQEYNRIQKELEREKA	1
Q9BV73	Centrosome-associated protein CEP250	CEP250	Y	1043	LVEQEVQEKLRETQEYNRIQKELEREKASLT	1
Q5VT06	Centrosome-associated protein 350	CEP350	S	507	RSKSRSENNIKKLASSLPDNKQEENTALNKD	0.807728
Q5VT06	Centrosome-associated protein 350	CEP350	S	2460	SIHSNVHSDRLLELKSPTELMKSKERSDVEH	0.804316
Q8NHQ1	Centrosomal protein of 70 kDa	CEP70	S	174	QHYKKKRTEQEETIASLQMEVCRLKKEEEDR	0.999976
Q9P209	Centrosomal protein of 72 kDa	CEP72	S	318	SMDTEDSASSQKLDLSGEMVPGPLPAPGKCR	1
P41208	Centrin-2	CETN2	S	20	FKKANMASSSQRKRMSPKPELTEEQKQEIRE	0.999987
Q9P2B7	Cilia- and flagella-associated protein 97	CFAP97	S	218	SSKSSKKHVSGITLLSPKHKYKSGIKSTETQ	0.999629
P23528	Cofilin-1	CFL1	S	3	_____________MASGVAVSDGVIKVFNDM	1
Q9Y281	Cofilin-2	CFL2	S	3	_____________MASGVTVNDEVIKVFNDM	0.999918
P13569	Cystic fibrosis transmembrane conductance regulator	CFTR	T	1211	SHVKKDDIWPSGGQMTVKDLTAKYTEGGNAI	0.847354
Q0VF96	Cingulin-like protein 1	CGNL1	S	31	GVHLRLASDDTQKSRSSQNSKAGSYGVSIRV	0.921207
Q0VF96	Cingulin-like protein 1	CGNL1	S	32	VHLRLASDDTQKSRSSQNSKAGSYGVSIRVQ	0.921207
Q13111	Chromatin assembly factor 1 subunit A	CHAF1A	S	141	QPDSLVDHNKLNSEASPSREAINGQREDTGD	0.830922
Q13112	Chromatin assembly factor 1 subunit B	CHAF1B	S	458	PTVIRDPPSITPAVKSPLPGPSEEKTLQPSS	0.999987
Q96JM3	Chromosome alignment-maintaining phosphoprotein 1	CHAMP1	S	627	LFPSSKKLKKDNQESSDAELSSSEYIKTDLD	0.892829
Q96JM3	Chromosome alignment-maintaining phosphoprotein 1	CHAMP1	S	386	KSSSVSPSSWKSPPASPESWKSGPPELRKTA	0.987769
Q96JM3	Chromosome alignment-maintaining phosphoprotein 1	CHAMP1	S	108	DKPKNQLNKETDPVKSPPLPEHQKIPCNSAE	1
Q96JM3	Chromosome alignment-maintaining phosphoprotein 1	CHAMP1	S	542	KPALFPEPAKTAPPASPEARKRALFPEPRKH	0.999624
Q96JM3	Chromosome alignment-maintaining phosphoprotein 1	CHAMP1	S	405	WKSGPPELRKTAPTLSPEHWKAVPPVSPELR	0.999082
Q96JM3	Chromosome alignment-maintaining phosphoprotein 1	CHAMP1	S	632	KKLKKDNQESSDAELSSSEYIKTDLDAMDIK	0.931808
Q96JM3	Chromosome alignment-maintaining phosphoprotein 1	CHAMP1	S	651	YIKTDLDAMDIKGQESSSDQEQVDVESIDFS	0.949403
Q96JM3	Chromosome alignment-maintaining phosphoprotein 1	CHAMP1	S	653	KTDLDAMDIKGQESSSDQEQVDVESIDFSKE	0.985744
Q96JM3	Chromosome alignment-maintaining phosphoprotein 1	CHAMP1	S	204	KSVPVCESQKLAPVPSPEPQKPAPVSPESVK	0.999964
Q96JM3	Chromosome alignment-maintaining phosphoprotein 1	CHAMP1	S	214	LAPVPSPEPQKPAPVSPESVKATLSNPKPQK	0.955183
Q96JM3	Chromosome alignment-maintaining phosphoprotein 1	CHAMP1	S	382	SASWKSSSVSPSSWKSPPASPESWKSGPPEL	0.999999
Q96JM3	Chromosome alignment-maintaining phosphoprotein 1	CHAMP1	S	386	KSSSVSPSSWKSPPASPESWKSGPPELRKTA	0.987769
Q12873	Chromodomain-helicase-DNA-binding protein 3	CHD3	S	713	YKKKKKELQGDGPPSSPTNDPTVKYETQPRF	0.992064
Q12873	Chromodomain-helicase-DNA-binding protein 3	CHD3	S	1601	NSRIGEKMETEADAPSPAPSLGERLEPRKIP	0.99634
Q12873	Chromodomain-helicase-DNA-binding protein 3	CHD3	S	274	KTKEGKGPGHKRRSKSPRVPDGRKKLRGKKM	1
H7C0J3		CHD3	S	371	RPRGRPPAQALGPAASPPPSPPLGPSLG___	0.992716
H7C0J3		CHD3	S	375	RPPAQALGPAASPPPSPPLGPSLG_______	0.992716
Q12873	Chromodomain-helicase-DNA-binding protein 3	CHD3	S	1601	NSRIGEKMETEADAPSPAPSLGERLEPRKIP	0.99634
Q12873	Chromodomain-helicase-DNA-binding protein 3	CHD3	S	1605	GEKMETEADAPSPAPSLGERLEPRKIPLEDE	0.999735
Q14839	Chromodomain-helicase-DNA-binding protein 4	CHD4	S	277	TKEGKGPNARRKPKGSPRVPDAKKPKPKKVA	1
Q14839	Chromodomain-helicase-DNA-binding protein 4	CHD4	S	1535	ELAEVEENKKMSQPGSPSPKTPTPSTPGDTQ	0.99841
Q14839	Chromodomain-helicase-DNA-binding protein 4	CHD4	S	1537	AEVEENKKMSQPGSPSPKTPTPSTPGDTQPN	0.999915
Q14839	Chromodomain-helicase-DNA-binding protein 4	CHD4	S	1308	GEEEEVEREIIKQEESVDPDYWEKLLRHHYE	1
Q14839	Chromodomain-helicase-DNA-binding protein 4	CHD4	T	1679	KEEEEKKEVMLQNGETPKDLNDEKQKKNIKQ	1
Q14839	Chromodomain-helicase-DNA-binding protein 4	CHD4	T	703	KLKKVKLRKLERPPETPTVDPTVKYERQPEY	0.99505
Q14839	Chromodomain-helicase-DNA-binding protein 4	CHD4	T	1540	EENKKMSQPGSPSPKTPTPSTPGDTQPNTPA	0.769096
Q14839	Chromodomain-helicase-DNA-binding protein 4	CHD4	T	1542	NKKMSQPGSPSPKTPTPSTPGDTQPNTPAPV	0.840125
Q14839	Chromodomain-helicase-DNA-binding protein 4	CHD4	S	1531	WSMPELAEVEENKKMSQPGSPSPKTPTPSTP	1
Q14839	Chromodomain-helicase-DNA-binding protein 4	CHD4	S	1535	ELAEVEENKKMSQPGSPSPKTPTPSTPGDTQ	0.99841
Q14839	Chromodomain-helicase-DNA-binding protein 4	CHD4	S	1537	AEVEENKKMSQPGSPSPKTPTPSTPGDTQPN	0.999915
Q14839	Chromodomain-helicase-DNA-binding protein 4	CHD4	T	1540	EENKKMSQPGSPSPKTPTPSTPGDTQPNTPA	0.769096
Q14839	Chromodomain-helicase-DNA-binding protein 4	CHD4	T	1553	PKTPTPSTPGDTQPNTPAPVPPAEDGIKIEE	0.999327
Q8TD26	Chromodomain-helicase-DNA-binding protein 6	CHD6	S	565	QQYEMVYRDAQGNPLSGVFKFHVVITTFEMI	0.990644
Q9P2D1	Chromodomain-helicase-DNA-binding protein 7	CHD7	S	1874	PTRTPFKDEIDEFANSPSEDKEESMEIHATG	0.998801
Q9P2D1	Chromodomain-helicase-DNA-binding protein 7	CHD7	S	2956	KAEGGPFKDGETLEGSDAEESLDKTAESSLL	0.999998
Q9HCK8	Chromodomain-helicase-DNA-binding protein 8	CHD8	S	2519	HHHHHPGLRAPGYPSSPVTTASGTTLRLPPL	0.829038
Q9UQN3	Charged multivesicular body protein 2b	CHMP2B	S	199	AARSLPSASTSKATISDEEIERQLKALGVD_	0.999997
Q6FI81	Anamorsin	CIAPIN1	S	305	YLGMPAFKPGEKVLLSDSNLHDA________	0.969938
I3L2J0		CIC	S	20	KKACTGLSGPGSGSKSPPATRAKALRRRGAG	1
O14578-4	Citron Rho-interacting kinase	CIT	S	2013	PHRYREGRTELRRDKSPGRPLEREKSPGRML	1
Q7Z460-4	CLIP-associating protein 1	CLASP1	S	1135	SLRGVTEAIEKFSFRSQEDLNEPIKRDGKKE	0.999973
Q7Z460-4	CLIP-associating protein 1	CLASP1	S	662	EYIGLDSGRIRTRRQSSGSATNVASTPDNRG	0.978419
Q7Z460-4	CLIP-associating protein 1	CLASP1	S	695	RAKVVSQSQPGSRSSSPGKLLGSGYGGLTGG	0.853239
Q7Z460-4	CLIP-associating protein 1	CLASP1	S	695	RAKVVSQSQPGSRSSSPGKLLGSGYGGLTGG	0.853239
Q7Z460-4	CLIP-associating protein 1	CLASP1	S	695	RAKVVSQSQPGSRSSSPGKLLGSGYGGLTGG	0.853239
Q8N2M8	CLK4-associating serine/arginine rich protein	CLASRP	S	547	PSPSPAREKLTRPAASPAVGEKLKKTEPAAG	0.999971
Q14677	Clathrin interactor 1	CLINT1	S	299	TIDLGAAAHYTGDKASPDQNASTHTPQSSVK	1
Q9UDT6-2	CAP-Gly domain-containing linker protein 1;CAP-Gly domain-containing linker protein 2	CLIP1;CLIP2	S	352	SGLLTETSSRYARKISGTTALQEALKEKQQH;TGLLTETSSRYARKISGTTALQEALKEKQQH	0.992432
Q9NWW5	Ceroid-lipofuscinosis neuronal protein 6	CLN6	S	31	PGAQLGASFLQARHGSVSADEAARTAPFHLD	0.999952
P54105	Methylosome subunit pICln	CLNS1A	S	102	EEESKEPVADEEEEDSDDDVEPITEFRFVPS	1
O75153	Clustered mitochondria protein homolog	CLUH	S	664	SLESKSEDPPGQEAGSEEEGSSASGLAKVKE	0.999926
O95628-8	CCR4-NOT transcription complex subunit 4	CNOT4	S	429	DLIEKELSVQDQPSLSPTSLQNSSSHTTTAK	0.858847
P09543	2',3'-cyclic-nucleotide 3'-phosphodiesterase	CNP	S	170	RLDCAQLKEKNQWQLSADDLKKLKPGLEKDF	1
Q9BZ76	Contactin-associated protein-like 3;Contactin-associated protein-like 3B	CNTNAP3;CNTNAP3B	S	140	REESIWGFPGNTNADSVVHYRLQPPFEARFL	0.910795
Q8WTW3	Conserved oligomeric Golgi complex subunit 1	COG1	S	7	_________MATAATSPALKRLDLRDPAALF	0.887395
Q9H9E3	Conserved oligomeric Golgi complex subunit 4	COG4	S	6	__________MADLDSPPKLSGVQQPSEGVG	1
P38432	Coilin	COIL	S	271	SISDGPSKVTLEARNSSEKLPTELSKEEPST	0.93461
P38432	Coilin	COIL	T	303	NTTADKLAIKLGFSLTPSKGKTSGTTSSSSD	0.995207
P35606	Coatomer subunit beta'	COPB2	S	859	PSRSTAQQELDGKPASPTPVIVASHTANKEE	0.977314
O14579	Coatomer subunit epsilon	COPE	S	10	______MAPPAPGPASGGSGEVDELFDVKNA	0.816262
O14579	Coatomer subunit epsilon	COPE	S	13	___MAPPAPGPASGGSGEVDELFDVKNAFYI	0.872692
P09669	Cytochrome c oxidase subunit 6C	COX6C	S	73	VMKDFEEMRKAGIFQSVK_____________	1
Q9BSW2-2	EF-hand calcium-binding domain-containing protein 4B	CRACR2A	S	521	QGQIPEAPPLKLTPTSPRGQPVGKEALCKEE	0.989551
P16220	Cyclic AMP-responsive element-binding protein 1	CREB1	S	142	ILSRRPSYRKILNDLSSDAPGVPRIEEEKSE	0.925949
Q53ET0	CREB-regulated transcription coactivator 2	CRTC2	S	433	ASTPGASPHHRRVPLSPLSLLAGPADARRSQ	0.973668
O75534	Cold shock domain-containing protein E1	CSDE1	S	482	KLTIAFQAKDVEGSTSPQIGDKVEFSISDKQ	0.910608
Q8N6G5	Chondroitin sulfate N-acetylgalactosaminyltransferase 2	CSGALNACT2	S	538	EEIETHLHKQAYRTNSEAVG___________	0.985688
P48730	Casein kinase I isoform delta	CSNK1D	S	331	RHSRNPATRGLPSTASGRLRGTQEVAPPTPL	0.813466
Q1MSJ5	Centrosome and spindle pole-associated protein 1	CSPP1	S	920	IIRSFIHESSMSRAQSPPVPARKNQLRAEEE	1
P21291	Cysteine and glycine-rich protein 1	CSRP1	S	192	PKGFGFGQGAGALVHSE______________	1
Q12996	Cleavage stimulation factor subunit 3	CSTF3	S	691	SNAVLTKAVKRPNEDSDEDEEKGAVVPPVHD	1
Q12996	Cleavage stimulation factor subunit 3	CSTF3	S	2	______________MSGDGATEQAAEYVPEK	0.999987
Q9UBT7-3	Alpha-catulin	CTNNAL1	S	399	LKISHSLNELKKEIISAAETLTLHPSSKIAK	0.999869
Q8WYA6	Beta-catenin-like protein 1	CTNNBL1	S	545	RHIIKEYAENIGDGRSPEFRENEQKRILGLL	1
P17812	CTP synthase 1	CTPS1	S	575	RLSPRDTYSDRSGSSSPDSEITELKFPSINH	0.814136
Q6PD62	RNA polymerase-associated protein CTR9 homolog	CTR9	T	925	RSKKGGEFDEFVNDDTDDDLPISKKKKRRKG	1
P08311	Cathepsin G	CTSG	S	201	CVGDRRERKAAFKGDSGGPLLCNNVAHGIVS	0.999374
Q9HCG8	Pre-mRNA-splicing factor CWC22 homolog	CWC22	S	91	RRERERDTDRKRSRKSPSPGRRNPETSVTQS	0.999872
Q9HCG8	Pre-mRNA-splicing factor CWC22 homolog	CWC22	S	93	ERERDTDRKRSRKSPSPGRRNPETSVTQSSS	0.999373
Q9NXE8	Pre-mRNA-splicing factor CWC25 homolog	CWC25	S	218	DEHSAGRSQKKMANSSPVLSKVPGYGLQVRN	0.964302
Q8TB03	Uncharacterized protein CXorf38	CXorf38	T	314	LCLHQKLDSQEPGRQTPDRKA__________	0.999959
Q53TN4-3	Cytochrome b reductase 1	CYBRD1	T	227	ARKRNLALDEAGQRSTM______________	0.80693
Q7L576	Cytoplasmic FMR1-interacting protein 1	CYFIP1	T	579	TMLESLIADKSGSKKTLRSSLEGPTILDIEK	0.989485
Q9Y271	Cysteinyl leukotriene receptor 1	CYSLTR1	S	326	KHSLSSVTYVPRKKASLPEKGEEICKV____	1
P51397	Death-associated protein 1	DAP	S	51	TKEEKDKDDQEWESPSPPKPTVFISGVIARG	0.993733
P51397	Death-associated protein 1	DAP	S	3	_____________MSSPPEGKLETKAGHPPA	0.996016
Q9UER7	Death domain-associated protein 6	DAXX	S	495	EDEEEEAAAGKDGDKSPMSSLQISNEKNLEP	0.999988
Q16643	Drebrin	DBN1	S	142	GAIGQRLSNGLARLSSPVLHRLRLREDENAE	0.999992
Q9UJU6-2	Drebrin-like protein	DBNL	S	284	MSTTSISSPQPGKLRSPFLQKQLTQPETHFG	1
Q9UK59	Lariat debranching enzyme	DBR1	S	386	CAQLGIIDINVRLQKSKEEHHVCGEYEEQDD	0.990156
Q96JK2	DDB1- and CUL4-associated factor 5	DCAF5	S	794	KLNGKALSSRAEEPPSPPVPKASGSTLNSGS	0.986724
Q8IZD4	mRNA-decapping enzyme 1B	DCP1B	S	147	QYEQLKAHQGTGAGISPVILNSGEGKEVDIL	1
Q9BTE7	DCN1-like protein 5;DCN1-like protein	DCUN1D5	S	9	_______MPVKKKRKSPGVAAAVAEDGGLKK	1
Q9BW61	DET1- and DDB1-associated protein 1	DDA1	S	95	EGESSAPPRKVARTDSPDMHEDT________	0.999181
Q92466	DNA damage-binding protein 2	DDB2	S	24	TQKTSEIVLRPRNKRSRSPLELEPEAKKLCA	1
Q92466	DNA damage-binding protein 2	DDB2	S	26	KTSEIVLRPRNKRSRSPLELEPEAKKLCAKG	1
Q92466	DNA damage-binding protein 2	DDB2	S	24	TQKTSEIVLRPRNKRSRSPLELEPEAKKLCA	1
Q92466	DNA damage-binding protein 2	DDB2	S	26	KTSEIVLRPRNKRSRSPLELEPEAKKLCAKG	1
Q92499	ATP-dependent RNA helicase DDX1	DDX1	S	481	TDDVHAKDNTRPGANSPEMWSEAIKILKGEY	0.98888
Q9UHI6	Probable ATP-dependent RNA helicase DDX20	DDX20	S	677	RTSSQSKGNKSYLEGSSDNQLKDSESTPVDD	1
Q9UHI6	Probable ATP-dependent RNA helicase DDX20	DDX20	S	678	TSSQSKGNKSYLEGSSDNQLKDSESTPVDDR	1
Q9UHI6	Probable ATP-dependent RNA helicase DDX20	DDX20	S	672	DSYSSRTSSQSKGNKSYLEGSSDNQLKDSES	0.997045
Q9UHI6	Probable ATP-dependent RNA helicase DDX20	DDX20	S	677	RTSSQSKGNKSYLEGSSDNQLKDSESTPVDD	1
Q9UHI6	Probable ATP-dependent RNA helicase DDX20	DDX20	S	678	TSSQSKGNKSYLEGSSDNQLKDSESTPVDDR	1
Q9NR30	Nucleolar RNA helicase 2	DDX21	S	71	KQVKKKAEPSEVDMNSPKSKKAKKKEEPSQN	1
Q9NR30	Nucleolar RNA helicase 2	DDX21	S	89	SKKAKKKEEPSQNDISPKTKSLRKKKEPIEK	1
Q9NR30	Nucleolar RNA helicase 2	DDX21	S	13	___MPGKLRSDAGLESDTAMKKGETLRKQTE	0.904384
Q9NR30	Nucleolar RNA helicase 2	DDX21	S	121	VVSSKTKKVTKNEEPSEEEIDAPKPKKMKKE	1
Q9BUQ8	Probable ATP-dependent RNA helicase DDX23	DDX23	S	14	__MAGELADKKDRDASPSKEERKRSRTPDRE	0.998527
Q9GZR7	ATP-dependent RNA helicase DDX24	DDX24	S	295	EAGAETRSPGKAEAESDALPDDTVIESEALP	1
Q9GZR7	ATP-dependent RNA helicase DDX24	DDX24	S	82	SLFSKEAPKRKAQAVSEEEEEEEGKSSSPKK	1
Q86XP3	ATP-dependent RNA helicase DDX42	DDX42	S	185	AGVVQEEEEDNLEYDSDGNPIAPTKKIIDPL	0.885626
Q9H0S4	Probable ATP-dependent RNA helicase DDX47	DDX47	S	9	_______MAAPEEHDSPTEASQPIVEEEETK	0.997723
Q9BQ39	ATP-dependent RNA helicase DDX50	DDX50	S	45	SDRRKSRHHYDSDEKSETRENGVTDDLDAPK	0.878219
Q9BQ39	ATP-dependent RNA helicase DDX50	DDX50	T	47	RRKSRHHYDSDEKSETRENGVTDDLDAPKAK	0.763362
Q8N8A6	ATP-dependent RNA helicase DDX51	DDX51	S	83	RRPRRRRRVNDAEPGSPEAPQGKRRKADGED	1
O75398	Deformed epidermal autoregulatory factor 1 homolog	DEAF1	S	176	TGLKGPAAPLTPGPQSPPTPLAPGQEKGGTK	0.994889
O75398	Deformed epidermal autoregulatory factor 1 homolog	DEAF1	T	312	FVPYKRRKKENELPTTPVKKDSPKNITLLPA	0.893778
Q9H4E7	Differentially expressed in FDCP 6 homolog	DEF6	S	606	QGNRTPSPNSNEQQKSLNGGDEAPAPASTPQ	1
P35659	Protein DEK	DEK	S	4	____________MSASAPAAEGEGTPTQPAS	0.876049
P35659	Protein DEK	DEK	S	51	EDEDDEEEEEEEKEKSLIVEGKREKKKVERL	1
P35659	Protein DEK	DEK	T	13	___MSASAPAAEGEGTPTQPASEKEPEMPGP	0.997161
Q8TEH3	DENN domain-containing protein 1A	DENND1A	S	592	NLDMEAALQPLGQAKSLEDLRAPKDLREQPG	1
Q8TEH3	DENN domain-containing protein 1A	DENND1A	T	707	PTLGSITIPRPQGRKTPELGIVPPPPIPRPA	1
Q7Z401	C-myc promoter-binding protein	DENND4A	S	1099	KPPLRSKRDSLEKESSDDDTPFDGSNYLADK	0.957347
Q7Z401	C-myc promoter-binding protein	DENND4A	S	1015	ETRNIQSRCFRKRHKSDNETNLQQQVVWGNR	0.9992
E9PAK5		DENND4B	S	7	_________MEADAVSEGGAMAEERPPRLVD	1
R4GNB2	DENN domain-containing protein 4C	DENND4C	S	1623	EIKRASGDVQTMKISSVPNSLSKRNVSLTRS	0.991265
O43583	Density-regulated protein	DENR	S	73	EKNFPNEFAKLTVENSPKQEAGISEGQGTAG	1
O43583	Density-regulated protein	DENR	T	86	ENSPKQEAGISEGQGTAGEEEEKKKQKRGGR	0.99999
O00273	DNA fragmentation factor subunit alpha	DFFA	S	315	TQSLHSLRSISASKASPPGDLQNPKRARQDP	1
Q96DF8	Protein DGCR14	DGCR14	T	3	_____________METPGASASSLLLPAASR	0.99544
Q9UBM7	7-dehydrocholesterol reductase	DHCR7	S	14	__MAAKSQPNIPKAKSLDGVTNDRTASQGQW	0.999986
Q7Z478	ATP-dependent RNA helicase DHX29	DHX29	S	200	KSRPKFQSPQIQATISPPLQPKTKTYEEDPK	0.999799
Q6P158	Putative ATP-dependent RNA helicase DHX57	DHX57	S	127	KALLRDLQEQDADAGSERGLSGEEEDDEPDC	1
Q14562	ATP-dependent RNA helicase DHX8	DHX8	S	460	EPPFLRGHTKQSMDMSPIKIVKNPDGSLSQA	1
Q08211	ATP-dependent RNA helicase A	DHX9	S	87	INEIKSEEVPAFGVASPPPLTDTPDTTANAE	0.982505
O60610	Protein diaphanous homolog 1	DIAPH1	S	1254	KDDAMAAVPAKVSKNSETFPTILEEAKELVG	0.984745
Q9BTC0	Death-inducer obliterator 1	DIDO1	S	1040	LSVPPSPNISTSESRSPPEGDTTLFLSRLST	0.999997
Q9BTC0	Death-inducer obliterator 1	DIDO1	S	805	KKTAPRQEAIPDLEDSPPVSDSEEQQESARA	0.999768
Q9BTC0	Death-inducer obliterator 1	DIDO1	S	809	PRQEAIPDLEDSPPVSDSEEQQESARAVPEK	0.931729
Q9P265	Disco-interacting protein 2 homolog A;Disco-interacting protein 2 homolog B	DIP2A;DIP2B	T	283	PVNSRVSSKIQQLLNTLKRPKRPPLKEFFVD;PVSSRVSTKIQQLLNTLKRPKRPPLKEFFVD	1
O60832	H/ACA ribonucleoprotein complex subunit 4	DKC1	S	494	AKAGLESGAEPGDGDSDTTKKKKKKKKAKEV	0.951505
O60832	H/ACA ribonucleoprotein complex subunit 4	DKC1	S	513	KKKKKKKKAKEVELVSE______________	1
O60832	H/ACA ribonucleoprotein complex subunit 4	DKC1	S	451	QVVAEAAKTAKRKRESESESDETPPAAPQLI	1
O60832	H/ACA ribonucleoprotein complex subunit 4	DKC1	S	485	KKKSKKDKKAKAGLESGAEPGDGDSDTTKKK	1
O60832	H/ACA ribonucleoprotein complex subunit 4	DKC1	S	494	AKAGLESGAEPGDGDSDTTKKKKKKKKAKEV	0.951505
O60832	H/ACA ribonucleoprotein complex subunit 4	DKC1	S	451	QVVAEAAKTAKRKRESESESDETPPAAPQLI	1
O60832	H/ACA ribonucleoprotein complex subunit 4	DKC1	S	453	VAEAAKTAKRKRESESESDETPPAAPQLIKK	0.999876
Q9Y2H0-3	Disks large-associated protein 4	DLGAP4	T	376	DELYHLKANSWQLVETPEKRKEEKKPPPPVP	1
Q9NPF5	DNA methyltransferase 1-associated protein 1	DMAP1	T	445	PDPKDTIIDVVGAPLTPNSRKRRESASSSSS	0.969071
P11532	Dystrophin	DMD	T	2551	NLKNKTSNQEARTIITDRIERIQNQWDEVQE	0.999986
Q8TDJ6	DmX-like protein 2	DMXL2	S	929	LKSVQACLAKASEGASSESLLSVPGQKNVDS	0.997471
Q0VDD8	Dynein heavy chain 14, axonemal	DNAH14	S	1314	RKQLSQQDHYNFGLRSLKIVLIMAGTKKREF	0.999865
Q0VDD8	Dynein heavy chain 14, axonemal	DNAH14	Y	1308	NLYELARKQLSQQDHYNFGLRSLKIVLIMAG	0.999905
P31689	DnaJ homolog subfamily A member 1	DNAJA1	S	335	LIIEFKVNFPENGFLSPDKLSLLEKLLPERK	1
Q99543	DnaJ homolog subfamily C member 2;DnaJ homolog subfamily C member 2, N-terminally processed	DNAJC2	S	47	GRWFEAFVKRRNRNASASFQELEDKKELSEE	1
Q99543	DnaJ homolog subfamily C member 2;DnaJ homolog subfamily C member 2, N-terminally processed	DNAJC2	S	47	GRWFEAFVKRRNRNASASFQELEDKKELSEE	1
Q99543	DnaJ homolog subfamily C member 2;DnaJ homolog subfamily C member 2, N-terminally processed	DNAJC2	S	49	WFEAFVKRRNRNASASFQELEDKKELSEESE	1
Q5F1R6	DnaJ homolog subfamily C member 21	DNAJC21	S	283	LQEMEARYEKEFGDGSDENEMEEHELKDEED	1
Q5F1R6	DnaJ homolog subfamily C member 21	DNAJC21	S	423	EGVKVDPEDTNLNQDSAKELEDSPQENVSVT	1
O00429	Dynamin-1-like protein	DNM1L	S	616	LLAEEKSKPIPIMPASPQKGHAVNLLDVPVP	1
P26358-2	DNA (cytosine-5)-methyltransferase 1	DNMT1	S	730	ADDDEEVDDNIPEMPSPKKMHQGKKKKQNKN	1
Q9Y6K1	DNA (cytosine-5)-methyltransferase 3A	DNMT3A	S	105	NGDLEKRSEPQPEEGSPAGGQKGGAPAEGEG	1
Q9Y6K1	DNA (cytosine-5)-methyltransferase 3A	DNMT3A	S	255	EEASPPAVQQPTDPASPTVATTPEPVGSDAG	0.941608
B9ZVU2		DNPEP	S	5	___________MSGHSPTRGAMQVAMNGKAR	0.997089
Q5QJE6	Deoxynucleotidyltransferase terminal-interacting protein 2	DNTTIP2	S	512	MSADKNFYLEEEDKASEVAIEEEKEEEEDEK	1
Q5QJE6	Deoxynucleotidyltransferase terminal-interacting protein 2	DNTTIP2	S	434	DFECDTKLYTSAPNTSQGKDNSVLLVLSSDE	0.843656
Q96BY6	Dedicator of cytokinesis protein 10	DOCK10	S	1257	TNGGFQSQTAIKHANSVDTSFSKDVLNSIAA	0.999957
Q96BY6	Dedicator of cytokinesis protein 10	DOCK10	T	1406	IAAAFKFVQSTQNNGTLKGSNPSCQTSGLLS	1
Q92608	Dedicator of cytokinesis protein 2	DOCK2	S	1706	PEVKLRRSKKRTKRSSVVFADEKAAAESDLK	0.948883
Q92608	Dedicator of cytokinesis protein 2	DOCK2	S	1685	LASPKTPRVEQEEPISPGSTLPEVKLRRSKK	0.999413
Q9H7D0	Dedicator of cytokinesis protein 5	DOCK5	S	1756	KSQVIAEKAPEPDLMSPTRKAQRPKSLQLMD	0.992902
D6RAM3	Docking protein 3	DOK3	S	274	PELTRPQPCPLPRATSLPSLDTPGELREMPP	0.998029
Q9Y3R5	Protein dopey-2	DOPEY2	S	1183	ESFKAGAKLSLVRVDSDKTQASESFSSDEEA	1
Q8TEK3	Histone-lysine N-methyltransferase, H3 lysine-79 specific	DOT1L	S	834	VPGSMKLSPQDPRPLSPGALQLAGEKSSEKG	1
Q8TEK3	Histone-lysine N-methyltransferase, H3 lysine-79 specific	DOT1L	S	1104	RKRASAGTPSLSAGVSPKRRALPSVAGLFTQ	0.999779
Q8TEK3	Histone-lysine N-methyltransferase, H3 lysine-79 specific	DOT1L	S	374	GPEGKVAGPADAPMDSGAEEEKAGAATVKKP	1
Q8TEK3	Histone-lysine N-methyltransferase, H3 lysine-79 specific	DOT1L	S	826	GLPYQSPSVPGSMKLSPQDPRPLSPGALQLA	1
Q8TEK3	Histone-lysine N-methyltransferase, H3 lysine-79 specific	DOT1L	S	834	VPGSMKLSPQDPRPLSPGALQLAGEKSSEKG	1
Q92785	Zinc finger protein ubi-d4	DPF2	S	244	AHSHLAEEEGEDKEDSQPPTPVSQRSEEQKS	0.999606
Q92785	Zinc finger protein ubi-d4	DPF2	T	248	LAEEEGEDKEDSQPPTPVSQRSEEQKSKKGP	0.965653
O60762	Dolichol-phosphate mannosyltransferase subunit 1	DPM1	S	9	_______MASLEVSRSPRRSRRELEVRSPRQ	0.99551
Q12882	Dihydropyrimidine dehydrogenase [NADP(+)]	DPYD	S	905	IAENKIRLKEQNVAFSPLKRNCFIPKRPIPT	1
H0YNW5		DUT	S	14	__MAAGGAAPETPAISPSKRARPAEVGGMQL	0.900013
P33316	Deoxyuridine 5'-triphosphate nucleotidohydrolase, mitochondrial	DUT	S	99	KAGGSPAPGPETPAISPSKRARPAEVGGMQL	0.80205
P33316-2	Deoxyuridine 5'-triphosphate nucleotidohydrolase, mitochondrial	DUT	S	11	_____MPCSEETPAISPSKRARPAEVGGMQL	0.999614
P63167	Dynein light chain 1, cytoplasmic	DYNLL1	S	21	AVIKNADMSEEMQQDSVECATQALEKYNIEK	0.991829
Q13627	Dual specificity tyrosine-phosphorylation-regulated kinase 1A;Dual specificity tyrosine-phosphorylation-regulated kinase 1B	DYRK1A;DYRK1B	Y	321	VDFGSSCQLGQRIYQYIQSRFYRSPEVLLGM	0.995546
Q16254	Transcription factor E2F4	E2F4	T	14	__MAEAGPQAPPPPGTPSRHEKSLGLLTTKF	0.796198
A0AVK6	Transcription factor E2F8	E2F8	S	417	KSIESDRRKINSAPSSPIKTNKAESSQNSAP	0.994947
A0AVK6	Transcription factor E2F8	E2F8	S	413	IKLVKSIESDRRKINSAPSSPIKTNKAESSQ	1
A0AVK6	Transcription factor E2F8	E2F8	S	417	KSIESDRRKINSAPSSPIKTNKAESSQNSAP	0.994947
Q96JC9	ELL-associated factor 1	EAF1	S	165	KPPVGPKTSPLKDNPSPEPQLDDIKRELRAE	1
Q96CJ1	ELL-associated factor 2	EAF2	S	154	NLVKHSPSEDKMSPASPIDDIERELKAEASL	0.999964
Q6P2E9	Enhancer of mRNA-decapping protein 4	EDC4	S	914	VPAPRLPAKDWKTKGSPRTSPKLKRKSKKDD	0.997651
Q6P2E9	Enhancer of mRNA-decapping protein 4	EDC4	S	918	RLPAKDWKTKGSPRTSPKLKRKSKKDDGDAA	0.971557
P68104	Elongation factor 1-alpha 1;Putative elongation factor 1-alpha-like 3;Elongation factor 1-alpha;Elongation factor 1-alpha 2	EEF1A1;EEF1A1P5;EEF1A2	S	107	APGHRDFIKNMITGTSQADCAVLIVAAGVGE	0.820804
P68104	Elongation factor 1-alpha 1;Putative elongation factor 1-alpha-like 3;Elongation factor 1-alpha;Elongation factor 1-alpha 2	EEF1A1;EEF1A1P5;EEF1A2	S	128	VLIVAAGVGEFEAGISKNGQTREHALLAYTL	0.888211
P24534	Elongation factor 1-beta	EEF1B2	S	95	GPADVEDTTGSGATDSKDDDDIDLFGSDDEE	0.998751
P24534	Elongation factor 1-beta	EEF1B2	S	128	EEAKRLREERLAQYESKKAKKPALVAKSSIL	1
P24534	Elongation factor 1-beta	EEF1B2	Y	126	ESEEAKRLREERLAQYESKKAKKPALVAKSS	1
P29692	Elongation factor 1-delta	EEF1D	S	133	SSPGHRATAPQTQHVSPMRQVEPPAKKPATP	0.999114
P13639	Elongation factor 2	EEF2	S	573	LKDLEEDHACIPIKKSDPVVSYRETVSEESN	0.996394
P13639	Elongation factor 2	EEF2	T	57	KAGIIASARAGETRFTDTRKDEQERCITIKS	0.952946
P13639	Elongation factor 2	EEF2	T	435	LVSTGLKVRIMGPNYTPGKKEDLYLKPIQRT	0.999328
P13639	Elongation factor 2	EEF2	Y	373	LPSPVTAQKYRCELLYEGPPDDEAAMGIKSC	0.997843
O00418	Eukaryotic elongation factor 2 kinase	EEF2K	S	18	DEDLIFRLEGVDGGQSPRAGHDGDSDGDSDD	1
Q7L9B9	Endonuclease/exonuclease/phosphatase family domain-containing protein 1	EEPD1	S	495	TKNPQGSKSLDNIWISKSLKKVFTGHWAVVR	0.999974
Q7L9B9	Endonuclease/exonuclease/phosphatase family domain-containing protein 1	EEPD1	S	497	NPQGSKSLDNIWISKSLKKVFTGHWAVVREG	0.999974
Q96C19	EF-hand domain-containing protein D2	EFHD2	S	74	LLRRADLNQGIGEPQSPSRRVFNPYTEFKEF	0.833446
Q8NDI1	EH domain-binding protein 1	EHBP1	S	1058	GNEEKAAITETQRKPSEDEVLNKGFKDTSQY	0.999843
Q8NDI1	EH domain-binding protein 1	EHBP1	S	408	TERRVKRKAPAPPVLSPKTGVLNENTVSAGK	1
Q8N3D4	EH domain-binding protein 1-like protein 1	EHBP1L1	S	310	AQDTAPTPAPRLRKGSDALRPPVPQGEDEVP	1
O14681	Etoposide-induced protein 2.4 homolog	EI24	S	326	LQSALSSSTSAEKFPSPHPSPAKLKATAGH_	1
O14681	Etoposide-induced protein 2.4 homolog	EI24	S	330	LSSSTSAEKFPSPHPSPAKLKATAGH_____	1
O14681	Etoposide-induced protein 2.4 homolog	EI24	S	326	LQSALSSSTSAEKFPSPHPSPAKLKATAGH_	1
O14681	Etoposide-induced protein 2.4 homolog	EI24	S	330	LSSSTSAEKFPSPHPSPAKLKATAGH_____	1
Q9BY44	Eukaryotic translation initiation factor 2A;Eukaryotic translation initiation factor 2A, N-terminally processed	EIF2A	S	506	HEAKKAAKQEARSDKSPDLAPTPAPQSTPRN	1
Q9UI10	Translation initiation factor eIF-2B subunit delta	EIF2B4	S	12	____MAAVAVAVREDSGSGMKAELPPGPGAV	0.884641
Q13144	Translation initiation factor eIF-2B subunit epsilon	EIF2B5	S	544	SEQSMDSEEPDSRGGSPQMDDIKVFQNEVLG	1
P20042	Eukaryotic translation initiation factor 2 subunit 2	EIF2S2	S	105	DIDEAEEGVKDLKIESDVQEPTEPEDDLDIM	0.998446
P20042	Eukaryotic translation initiation factor 2 subunit 2	EIF2S2	S	2	______________MSGDEMIFDPTMSKKKK	1
Q99613	Eukaryotic translation initiation factor 3 subunit C;Eukaryotic translation initiation factor 3 subunit C-like protein	EIF3C;EIF3CL	S	166	DFESHITSYKQNPEQSADEDAEKNEEDSEGS	1
Q99613	Eukaryotic translation initiation factor 3 subunit C;Eukaryotic translation initiation factor 3 subunit C-like protein	EIF3C;EIF3CL	S	39	TKPVGGNYGKQPLLLSEDEEDTKRVVRSAKD	1
O75821	Eukaryotic translation initiation factor 3 subunit G	EIF3G	S	42	TSELLKGIPLATGDTSPEPELLPGAPLPPPK	0.986127
O15372	Eukaryotic translation initiation factor 3 subunit H	EIF3H	S	183	RLTPKLMEVCKEKDFSPEALKKANITFEYMF	1
O75822	Eukaryotic translation initiation factor 3 subunit J	EIF3J	S	11	_____MAAAAAAAGDSDSWDADAFSVEDPVR	0.975929
O75822	Eukaryotic translation initiation factor 3 subunit J	EIF3J	T	200	RDVCISLEIDDLKKITNSLTVLCSEKQKQEK	0.974342
O75822	Eukaryotic translation initiation factor 3 subunit J	EIF3J	T	109	DEDVKLEEPEEPKVLTPEEQLADKLRLKKLQ;EIKKRLEEPEEPKVLTPEEQLADKLRLKKLQ	1
P38919	Eukaryotic initiation factor 4A-III;Eukaryotic initiation factor 4A-III, N-terminally processed	EIF4A3	S	12	____MATTATMATSGSARKRLLKEEDMTKVE	0.862377
P23588	Eukaryotic translation initiation factor 4B	EIF4B	S	445	STTSSRNARRRESEKSLENETLNKEEDCHSP	1
P23588	Eukaryotic translation initiation factor 4B	EIF4B	S	597	NPASKFSSASKYAALSVDGEDENEGEDYAE_	1
Q9NRA8	Eukaryotic translation initiation factor 4E transporter	EIF4ENIF1	S	564	GSLEPTTSLLGQRAPSPPLSQVFQTRAASAD	1
E9PGM1		EIF4G1	S	1152	REAALPPVSPLKAALSEEELEKKSKAIIEEY	1
E9PGM1		EIF4G1	S	1123	SRERPSQPEGLRKAASLTEDRDRGRDAVKRE	0.998555
E9PGM1		EIF4G1	S	1145	RGRDAVKREAALPPVSPLKAALSEEELEKKS	1
E9PGM1		EIF4G1	S	1510	SVTAFFKWLREAEEESDHN____________	1
A0A0A0MSA7	Eukaryotic translation initiation factor 4 gamma 3	EIF4G3	S	231	KQEEKPKPDPVLKSPSPVLRLVLSGEKKEQE	0.996555
P63241	Eukaryotic translation initiation factor 5A-1;Eukaryotic translation initiation factor 5A-1-like	EIF5A;EIF5AL1	S	139	EQKYDCGEEILITVLSAMTEEAAVAIKAMAK	0.954704
P63241	Eukaryotic translation initiation factor 5A-1;Eukaryotic translation initiation factor 5A-1-like	EIF5A;EIF5AL1	T	136	KEIEQKYDCGEEILITVLSAMTEEAAVAIKA	0.936979
O60841	Eukaryotic translation initiation factor 5B	EIF5B	S	66	QDFDEDDILKELEELSLEAQGIKADRETVAV	1
O60841	Eukaryotic translation initiation factor 5B	EIF5B	S	1168	KGQEVCVKIEPIPGESPKMFGRHFEATDILV	1
O60841	Eukaryotic translation initiation factor 5B	EIF5B	S	107	TSKDKKKKGQKGKKQSFDDNDSEELEDKDSK	1
O60841	Eukaryotic translation initiation factor 5B	EIF5B	S	113	KKGQKGKKQSFDDNDSEELEDKDSKSKKTAK	1
O60841	Eukaryotic translation initiation factor 5B	EIF5B	S	164	KAKGKAQKSNKKWDGSEEDEDNSKKIKERSR	1
O60841	Eukaryotic translation initiation factor 5B	EIF5B	S	214	GQKKNQKNKPGPNIESGNEDDDASFKIKTVA	1
O60841	Eukaryotic translation initiation factor 5B	EIF5B	S	107	TSKDKKKKGQKGKKQSFDDNDSEELEDKDSK	1
O60841	Eukaryotic translation initiation factor 5B	EIF5B	S	113	KKGQKGKKQSFDDNDSEELEDKDSKSKKTAK	1
P32519	ETS-related transcription factor Elf-1	ELF1	S	163	PEVMETQQVQEKYADSPGASSPEQPKRKKGR	0.999999
P32519	ETS-related transcription factor Elf-1	ELF1	S	167	ETQQVQEKYADSPGASSPEQPKRKKGRKTKP	0.839671
P32519	ETS-related transcription factor Elf-1	ELF1	S	168	TQQVQEKYADSPGASSPEQPKRKKGRKTKPP	0.994168
P32519	ETS-related transcription factor Elf-1	ELF1	S	163	PEVMETQQVQEKYADSPGASSPEQPKRKKGR	0.999999
O00472	RNA polymerase II elongation factor ELL2	ELL2	S	503	EDLKREEEIAKLNNSSPNSSGGVKEDCTASM	0.917143
Q6PJG2	ELM2 and SANT domain-containing protein 1	ELMSAN1	S	461	LRGGVIQSTRRRRRASQEANLLTLAQKAVEL	0.999998
Q32P44	Echinoderm microtubule-associated protein-like 3	EML3	S	198	RSGSTESRGGKDPLSSPGGPGSRRSNYNLEG	0.977096
Q8N8S7-2	Protein enabled homolog	ENAH	S	508	TRKPWERTNTMNGSKSPVISRPKSTPLSQPS	1
P09104	Gamma-enolase;Enolase	ENO2	T	351	ACNCLLLKVNQIGSVTEAIQACKLAQENGWG	0.984517
O43768	Alpha-endosulfine	ENSA	S	2	______________MSQKQEEENPAEETGEE	1
O43768	Alpha-endosulfine;cAMP-regulated phosphoprotein 19	ENSA;ARPP19	S	67	DFLMKRLQKGQKYFDSGDYNMAKAKMKNKQL;DFLRKRLQKGQKYFDSGDYNMAKAKMKNKQL	0.999986
Q09472	Histone acetyltransferase p300	EP300	S	12	____MAENVVEPGPPSAKRPKLSSPALSASA	1
Q09472	Histone acetyltransferase p300	EP300	S	1038	IKEEEDQPSTSATQSSPAPGQSKKKIFKPEE	0.935624
E9PHY5	Band 4.1-like protein 2	EPB41L2	S	645	KDERVITEEMNGKEISPGSGPGEIRKVEPVT	0.919827
E9PHY5	Band 4.1-like protein 2	EPB41L2	S	648	RVITEEMNGKEISPGSGPGEIRKVEPVTQKD	0.999996
E9PHY5	Band 4.1-like protein 2	EPB41L2	S	39	KEKPKEVAENQQNQSSDPEEEKGSQPPPAAE	0.96909
E9PHY5	Band 4.1-like protein 2	EPB41L2	S	7	_________MTTEVGSVSEVKKDSSQLGTDA	0.842771
Q9Y2J2-2	Band 4.1-like protein 3;Band 4.1-like protein 3, N-terminally processed	EPB41L3	S	478	AAEVGTGQYATTKGISQTNLITTVTPEKKAE	0.999998
Q9Y2J2-2	Band 4.1-like protein 3;Band 4.1-like protein 3, N-terminally processed	EPB41L3	S	88	AAKQLEYQQLEDDKLSQKSSSSKLSRSPLKI	1
Q9Y2J2-2	Band 4.1-like protein 3;Band 4.1-like protein 3, N-terminally processed	EPB41L3	T	487	ATTKGISQTNLITTVTPEKKAEEERDEEEDK	0.992196
Q9Y2J2-2	Band 4.1-like protein 3;Band 4.1-like protein 3, N-terminally processed	EPB41L3	S	7	_________MTTESGSDSESKPDQEAEPQEA	0.835501
Q9Y6I3	Epsin-1	EPN1	T	470	PPPAATPTPTPPTRKTPESFLGPNAALVDLD	0.935316
P07814	Bifunctional glutamate/proline--tRNA ligase;Glutamate--tRNA ligase;Proline--tRNA ligase	EPRS	S	999	GQRKDPSKNQGGGLSSSGAGEGQGPKKQTRL	0.991284
P07814	Bifunctional glutamate/proline--tRNA ligase;Glutamate--tRNA ligase;Proline--tRNA ligase	EPRS	S	1000	QRKDPSKNQGGGLSSSGAGEGQGPKKQTRLG	0.948637
P42566	Epidermal growth factor receptor substrate 15	EPS15	S	796	PCPLPPGKRSINKLDSPDPFKLNDPFQPFPG	1
P42566	Epidermal growth factor receptor substrate 15	EPS15	S	814	PFKLNDPFQPFPGNDSPKEKDPEIFCDPFTS	1
P42566	Epidermal growth factor receptor substrate 15	EPS15	S	324	PPSDRASLQKNIIGSSPVADFSAIKELDTLN	0.877932
P42566	Epidermal growth factor receptor substrate 15	EPS15	T	777	VKSEDEPPALPPKIGTPTRPCPLPPGKRSIN	0.999929
P42566	Epidermal growth factor receptor substrate 15	EPS15	T	779	SEDEPPALPPKIGTPTRPCPLPPGKRSINKL	0.999929
Q9UBC2	Epidermal growth factor receptor substrate 15-like 1	EPS15L1	S	229	RKKTVFPGAVPVLPASPPPKDSLRSTPSHGS	1
Q96RT1	Protein LAP2	ERBB2IP	S	562	DEREKYMIGNSVQKISEPEAEISPGSLPVTA	0.999935
Q96RT1	Protein LAP2	ERBB2IP	S	852	EPHDSDCSVDLGISKSTEDLSPQKSGPVGSV	0.924427
Q96RT1	Protein LAP2	ERBB2IP	S	630	PLIETSINQPKVVALSNNKKDDTKETDSLSD	1
P28715	DNA repair protein complementing XP-G cells	ERCC5;BIVM-ERCC5	S	563	ELCPYESKFDSSLLSSDDETKCKPNSASEVI	0.998695
P28715	DNA repair protein complementing XP-G cells	ERCC5;BIVM-ERCC5	S	562	NELCPYESKFDSSLLSSDDETKCKPNSASEV	0.999035
P28715	DNA repair protein complementing XP-G cells	ERCC5;BIVM-ERCC5	S	563	ELCPYESKFDSSLLSSDDETKCKPNSASEVI	0.998695
Q03468	DNA excision repair protein ERCC-6	ERCC6;ERCC6-PGBD3	T	303	QGCNKRAARKAPAPVTPPAPVQNKNKPNKKA	1
Q2NKX8	DNA excision repair protein ERCC-6-like	ERCC6L	S	1028	VVVKAKIRSKARRIVSDGEDEDDSFKDTSSI	0.999934
Q9Y282	Endoplasmic reticulum-Golgi intermediate compartment protein 3	ERGIC3	S	116	HNLFKQRLDKDGIPVSSEAERHELGKVEVTV	0.795027
Q96PL5	Erythroid membrane-associated protein	ERMAP	S	418	GKNTAPLVICSELHKSEESIVPRPEGKGHAN	0.999769
Q9H501	ESF1 homolog	ESF1	S	694	IGINKKSVKSAKDGTSPEEEIEIERQKAEMA	0.791048
Q9H501	ESF1 homolog	ESF1	S	153	KKMKTSCKFKIDSNISPKKDSKEFTQKNKKE	0.999999
Q9H501	ESF1 homolog	ESF1	S	657	KKRLKRKQKALAEEASEEELPSDVDLNDPYF	0.999863
Q9H501	ESF1 homolog	ESF1	S	663	KQKALAEEASEEELPSDVDLNDPYFAEEVKQ	0.995554
A0FGR8-2	Extended synaptotagmin-2	ESYT2	S	730	SPGHISVKEPTPSIASDISLPIATQELRQRL	0.839839
P34910	Protein EVI2B	EVI2B	S	294	KSTLLADDLEIKLFESSENIEDSNNPKTEKI	0.990386
Q9NV70-2	Exocyst complex component 1	EXOC1	S	448	MTGTTKESKKFGLHGSSGKLTGSTSSLNKLS	0.991367
Q9NV70-2	Exocyst complex component 1	EXOC1	S	455	SKKFGLHGSSGKLTGSTSSLNKLSVQSSGNR	0.982769
Q9NV70-2	Exocyst complex component 1	EXOC1	S	458	FGLHGSSGKLTGSTSSLNKLSVQSSGNRRSQ	0.962438
Q9NV70-2	Exocyst complex component 1	EXOC1	S	455	SKKFGLHGSSGKLTGSTSSLNKLSVQSSGNR	0.982769
Q15024	Exosome complex component RRP42	EXOSC7	S	177	NTRIPRVRVLEDEEGSKDIELSDDPYDCIRL	1
Q06265-3	Exosome complex component RRP45	EXOSC9	S	222	QRITAFKMEKAPIDTSDVEEKAEEIIAEAEP	0.997818
Q15910	Histone-lysine N-methyltransferase EZH2	EZH2	T	487	KESSIIAPAPAEDVDTPPRKKKRKHRLWAAH	0.999998
P26038	Ezrin;Moesin;Radixin	EZR;MSN;RDX	T	558	IIHNENMRQGRDKYKTLRQIRQGNTKQRIDE;MIHAENMRLGRDKYKTLRQIRQGNTKQRIDE;VLHAENVKAGRDKYKTLRQIRQGNTKQRIDE	0.999982
P25116	Proteinase-activated receptor 1	F2R	Y	52	TLDPRSFLLRNPNDKYEPFWEDEEKNESGLT	1
Q8N5W9	Filamin-interacting protein FAM101B	FAM101B	S	6	__________MVGRLSLQDVPELVDAKKKGD	1
Q5T8I3	Protein FAM102B	FAM102B	S	288	DTASEKLSRCPVKQDSVESQLKRVDDTRVDA	0.998896
Q8IWE2	Protein NOXP20	FAM114A1	S	2	______________MSDDAGDTLATGDKAEV	1
Q6P1L5	Protein FAM117B	FAM117B	S	449	DDLLVDPRDKENGNNSPLPKYATSPKPNNSY	1
Q8IXS8	Protein FAM126B	FAM126B	S	508	QEDRLGQAGEGKELLSPGAPLTKQSRSPSFN	1
Q96TA1	Niban-like protein 1	FAM129B	S	692	PAGESPQPKAAPEASSPPASPLQHLLPGKAV	0.974458
Q96TA1	Niban-like protein 1	FAM129B	S	692	PAGESPQPKAAPEASSPPASPLQHLLPGKAV	0.974458
Q96TA1	Niban-like protein 1	FAM129B	S	696	SPQPKAAPEASSPPASPLQHLLPGKAVDLGP	1
Q8NC44	Protein FAM134A	FAM134A	S	385	DLLGRPQALSRQALDSEEEEEDVAAKETLLR	1
Q86VR2	Protein FAM134C	FAM134C	S	26	PGPASGSTFRGRRDVSGSWERDQQVEAAQRA	0.947971
Q6UWZ7	BRCA1-A complex subunit Abraxas	FAM175A	S	406	DEEIEKMKGFGEYSRSPTF____________	0.969601
Q8IX21	Protein FAM178A	FAM178A	S	340	AGSKQNKFPEKRKRNSVDSDLKSTRESMIPK	0.999454
A6NE01	Protein FAM186A	FAM186A	T	897	QWQEEEMWKEEQKQATPKQAEQEEKQKQRGQ	1
A6NE01	Protein FAM186A	FAM186A	T	107	SERNVSLTEHKKKQRTNFLEKMATYAKTIEI	0.999673
A6NE01	Protein FAM186A	FAM186A	T	115	EHKKKQRTNFLEKMATYAKTIEIREKTLANI	0.996136
H3BNK9		FAM192A	S	25	NGRKFENLKIQKVGISQENKKEVEKKLTVKP	1
P78312	Protein FAM193A	FAM193A	S	1144	SPGEHQQNSKLVLAESPQPKGKNKKNKKKKG	1
Q9NSI2	Protein FAM207A	FAM207A	T	34	KGEAAPGPAPPAPEATPPPASAAGKDWAFIN	0.999636
Q9UK61	Protein FAM208A	FAM208A	S	1103	IIIKASAKGGNLPPVSPNDSGAKIASNPLER	0.99586
Q9UK61	Protein FAM208A	FAM208A	S	927	EIHWKLIPITGGNARSPEDQLGKHGEKQTPG	0.999413
Q9UK61	Protein FAM208A	FAM208A	S	694	DRVKELINLIQCRKKSVGGDSDTEDMRSKTV	0.999998
Q9UK61	Protein FAM208A	FAM208A	S	694	DRVKELINLIQCRKKSVGGDSDTEDMRSKTV	0.999998
Q9UK61	Protein FAM208A	FAM208A	S	699	LINLIQCRKKSVGGDSDTEDMRSKTVLKRKL	0.963284
Q5VWN6	Protein FAM208B	FAM208B	S	2009	DSQHSASSANVFPKESPTQISIGAFPSTKIS	0.997606
Q5VWN6	Protein FAM208B	FAM208B	S	685	EREILSPLFPRNGTKSPEAATPVGKVMPFRH	1
Q641Q2	WASH complex subunit FAM21A	FAM21A	S	539	NLKPSSETKTQKGLFSDEEDSEDLFSSQSAS	1
Q641Q2	WASH complex subunit FAM21C;WASH complex subunit FAM21A	FAM21C;FAM21A	S	498	FGDEEGDLFKEKAVASPEATVSQTDENKARA	1
Q641Q2	WASH complex subunit FAM21C;WASH complex subunit FAM21A	FAM21C;FAM21A	S	333	KPRKTLKEKKERRTPSDDEEDNLFAPPKLTD	0.897681
Q641Q2	WASH complex subunit FAM21C;WASH complex subunit FAM21A	FAM21C;FAM21A	S	728	TKKKETVSEAPPLLFSDEEEKEAQLGVKSVD	1
Q641Q2	WASH complex subunit FAM21C;WASH complex subunit FAM21A	FAM21C;FAM21A	S	352	EDNLFAPPKLTDEDFSPFGSGGGLFSGGKGL	1
Q641Q2	WASH complex subunit FAM21C;WASH complex subunit FAM21A	FAM21C;FAM21A	S	158	VLDSAFEQLDIKAGNSDSEEDDANGRVELIL	1
Q641Q2	WASH complex subunit FAM21C;WASH complex subunit FAM21A	FAM21C;FAM21A	S	160	DSAFEQLDIKAGNSDSEEDDANGRVELILEP	1
Q9NP50	Protein FAM60A	FAM60A	S	105	LKPKKVKTLSGNRIKSNQISKLQKEFKRHNS	1
Q9NP50	Protein FAM60A	FAM60A	S	109	KVKTLSGNRIKSNQISKLQKEFKRHNSDAHS	1
Q9BSJ6	Protein FAM64A	FAM64A	S	131	VKARRRKRGAQKGSGSPTHSLSQKSTRLSGA	0.993288
Q5HYJ3	Protein FAM76B	FAM76B	S	193	HHHRHSSSHHKISNLSPEEEQGLWKQSHKSS	1
Q6ZRV2	Protein FAM83H	FAM83H	S	523	LDYVPSSASREVRHGSDPAFAPGPRGLEPSG	1
Q6ZRV2	Protein FAM83H	FAM83H	S	647	VPAAFPTKVPVPGPGSGGNGPEREGPEEPGL	1
Q6ZRV2	Protein FAM83H	FAM83H	S	881	ESKGSPTSAYPERKGSPTPGFSTRRGSPTTG	0.8753
Q658Y4	Protein FAM91A1	FAM91A1	S	671	VTMLNASSQLADRKLSDASDERGEPDLASGS	0.999993
Q9BXW9	Fanconi anemia group D2 protein	FANCD2	S	1435	ASKSKATEDGEEDEVSAGEKEQDSDESYDDS	1
Q9HB96	Fanconi anemia group E protein	FANCE	S	249	PEHKSLESLADGGSASPIKDQPVMAVKTGED	0.956637
P22087	rRNA 2'-O-methyltransferase fibrillarin	FBL	S	124	KNLVPGESVYGEKRVSISEGDDKIEYRAWNP	0.998843
Q8N4B4	F-box only protein 39	FBXO39	T	405	KERQCALRVFKARIYTNRYETNEEDKTLQEI	1
Q8N4B4	F-box only protein 39	FBXO39	Y	404	QKERQCALRVFKARIYTNRYETNEEDKTLQE	1
Q96P31	Fc receptor-like protein 3	FCRL3	T	75	HDEKLLKIKHDKIQITEPGNYQCKTRGSSLS	1
Q96P31	Fc receptor-like protein 3	FCRL3	Y	80	LKIKHDKIQITEPGNYQCKTRGSSLSDAVHV	1
Q99689	Fasciculation and elongation protein zeta-1	FEZ1	S	58	LSELENFSSEIISFKSMEDLVNEFDEKLNVC	1
Q5JSP0	FYVE, RhoGEF and PH domain-containing protein 3	FGD3	S	128	LDSQVPKVTPQEEADSDVGEEPDSENTPQKA	1
O95684	FGFR1 oncogene partner	FGFR1OP	S	156	GPTTGEGALDLSDVHSPPKSPEGKTSAQTTP	0.999825
Q9Y613	FH1/FH2 domain-containing protein 1	FHOD1	S	523	QRSLAPEPKEPLIPASPKAEPIWELPTRAPR	1
Q6UN15	Pre-mRNA 3'-end-processing factor FIP1	FIP1L1	S	259	SEKETALPSTKAEFTSPPSLFKTGLPPSRNS;SEKETALPSTKAEFTSPPSLFKTGLPPSRRL	0.990729
Q6UN15	Pre-mRNA 3'-end-processing factor FIP1	FIP1L1	S	304	NSSVGKWQDRYGRAESPDLRRLPGAIDVIGQ	1
Q6UN15	Pre-mRNA 3'-end-processing factor FIP1	FIP1L1	S	579	KHKKSKRSKEGKEAGSEPAPEQESTEATPAE	0.999947
Q5T1M5	FK506-binding protein 15;Peptidyl-prolyl cis-trans isomerase	FKBP15	S	1012	QALTTSQDGHRRKGDSEAEALSEIKDGSLPP	1
Q02790	Peptidyl-prolyl cis-trans isomerase FKBP4;Peptidyl-prolyl cis-trans isomerase FKBP4, N-terminally processed	FKBP4	S	336	SHLNLAMCHLKLQAFSAAIESCNKALELDSN	0.999799
Q13451	Peptidyl-prolyl cis-trans isomerase FKBP5;Peptidyl-prolyl cis-trans isomerase FKBP5, N-terminally processed	FKBP5	S	13	___MTTDEGAKNNEESPTATVAEQGEDITSK	0.999999
Q01543	Friend leukemia integration 1 transcription factor	FLI1	S	39	GAAAHLPKADMTASGSPDYGQPHKINPLPPQ	0.998175
Q01543	Friend leukemia integration 1 transcription factor	FLI1	S	241	RRGAWGNNMNSGLNKSPPLGGAQTISKNTEQ	1
Q01543-3	Friend leukemia integration 1 transcription factor	FLI1	S	6	__________MTASGSPDYGQPHKINPLPPQ	0.999868
P21333	Filamin-A	FLNA	S	1454	KVPVHDVTDASKVKCSGPGLSPGMVRANLPQ	0.999009
P21333	Filamin-A	FLNA	T	2381	AKVHSPSGALEECYVTEIDQDKYAVRFIPRE	0.939104
P21333	Filamin-A	FLNA	Y	2297	EISFEDRKDGSCGVAYVVQEPGDYEVSVKFN	0.762972
Q9Y5Y0	Feline leukemia virus subgroup C receptor-related protein 1	FLVCR1	S	536	NIGITNVDVKAIPADSPTDQEPKTVMLSKQS	0.990222
O95466-2	Formin-like protein 1	FMNL1	S	184	DNGASNSEKNKPLEQSVEDLSKGPPSSVPKS	0.999999
O95466-2	Formin-like protein 1	FMNL1	S	624	PPPPGGPPDALGRRDSELGPGVKAKKPIQTK	1
O95466-2	Formin-like protein 1	FMNL1	T	1020	EQWKKEAAAQEAGADTPGKGEPPAPKSPPKA	1
B7ZL14	Formin-binding protein 1	FNBP1	Y	65	SKKYQPKKNSKEEEEYKYTSCKAFISNLNEM	0.99979
Q8N3X1	Formin-binding protein 4	FNBP4	S	508	EKIDENSDKEMEVEESPEKIKVQTTPKVEEE	1
Q8N3X1	Formin-binding protein 4	FNBP4	S	499	ETAIGAENSEKIDENSDKEMEVEESPEKIKV	1
Q8N3X1	Formin-binding protein 4	FNBP4	T	479	SPESTSRSSSKTGRDTPENGETAIGAENSEK	0.76419
P49354	Protein farnesyltransferase/geranylgeranyltransferase type-1 subunit alpha	FNTA	S	373	YIGRSLQSKHSTENDSPTNVQQ_________	0.891073
P15408	Fos-related antigen 2	FOSL2	S	230	SVGAVVVKQEPLEEDSPSSSSAGLDKAQRSV	0.99666
P85037	Forkhead box protein K1	FOXK1	S	299	AKAASEQQADTSGGDSPKDESKPPFSYAQLI	0.990632
P85037	Forkhead box protein K1	FOXK1	S	213	KIQFTSLYHKEEAPASPLRPLYPQISPLKIH	1
P85037	Forkhead box protein K1	FOXK1	S	445	RSGGLQTPECLSREGSPIPHDPEFGSKLASV	1
U3KQ26		FOXK1	S	106	AKAASEQQADTSGGDSPKV____________	0.990632
P85037	Forkhead box protein K1	FOXK1	S	213	KIQFTSLYHKEEAPASPLRPLYPQISPLKIH	1
P85037	Forkhead box protein K1	FOXK1	S	223	EEAPASPLRPLYPQISPLKIHIPEPDLRSMV	0.998403
P85037	Forkhead box protein K1	FOXK1	S	416	GVSCFRTPFGPLSSRSAPASPTHPGLMSPRS	0.999996
P85037	Forkhead box protein K1	FOXK1	S	420	FRTPFGPLSSRSAPASPTHPGLMSPRSGGLQ	0.973687
Q01167	Forkhead box protein K2	FOXK2	S	398	HSSGAQTPESLSREGSPAPLEPEPGAAQPKL	1
Q01167	Forkhead box protein K2	FOXK2	S	170	TALSSEKREKQEASESPVKAVQPHISPLTIN	0.999081
Q08050	Forkhead box protein M1	FOXM1	S	481	PGEEMPHLARPIKVESPPLEEWPSPAPSFKE	1
Q8IVH2	Forkhead box protein P4	FOXP4	S	554	DEREYQKRRPPKMTGSPTLVKNMISGLSYGA	0.996896
P02794	Ferritin heavy chain;Ferritin heavy chain, N-terminally processed;Ferritin	FTH1	S	179	SGLAEYLFDKHTLGDSDNES___________	1
Q8IY81	pre-rRNA processing protein FTSJ3	FTSJ3	S	599	SPLYQDEAPKGTEASSGTEAATGLEGEEKDG	0.978299
Q9BWH2	FUN14 domain-containing protein 2	FUNDC2	S	151	EKDMKKAKEQLKIRKSNQIPTEVRSKAEEVV	0.999985
P35637	RNA-binding protein FUS;TATA-binding protein-associated factor 2N	FUS;TAF15	S	340	YTDKDTGKPKGEATVSFDDPPSAKAAIDWFD;YTDRETGKLKGEATVSFDDPPSAKAAIDWFD	0.986983
Q96QD9	UAP56-interacting factor	FYTTD1	S	23	LVGATATSSPPPKARSNENLDKIDMSLDDII	1
Q13283	Ras GTPase-activating protein-binding protein 1	G3BP1	S	232	PVLEETAPEDAQKSSSPAPADIAQTVQEDLR	0.975979
Q13283	Ras GTPase-activating protein-binding protein 1	G3BP1	S	149	QDEVFGGFVTEPQEESEEEVEEPEERQQTPE	0.999989
Q9UN86	Ras GTPase-activating protein-binding protein 2	G3BP2	T	227	QVEEKNLEELEEKSTTPPPAEPVSLPQEPPK	0.986472
O14976	Cyclin-G-associated kinase	GAK	S	73	QDVGSGREYALKRLLSNEEEKNRAIIQEVCF	1
P47211	Galanin receptor type 1	GALR1	S	140	TLAAMSVDRYVAIVHSRRSSSLRVSRNALLG	1
P47211	Galanin receptor type 1	GALR1	Y	134	MLVSIFTLAAMSVDRYVAIVHSRRSSSLRVS	1
P04406	Glyceraldehyde-3-phosphate dehydrogenase	GAPDH	S	83	VINGNPITIFQERDPSKIKWGDAGAEYVVES	0.999989
P22102	Trifunctional purine biosynthetic protein adenosine-3;Phosphoribosylamine--glycine ligase;Phosphoribosylformylglycinamidine cyclo-ligase;Phosphoribosylglycinamide formyltransferase	GART	S	796	LIESMQINGSVLKNGSLTNHFSFEKKKARVA	0.999952
P22102	Trifunctional purine biosynthetic protein adenosine-3;Phosphoribosylamine--glycine ligase;Phosphoribosylformylglycinamidine cyclo-ligase;Phosphoribosylglycinamide formyltransferase	GART	S	802	INGSVLKNGSLTNHFSFEKKKARVAVLISGT	0.999771
P16383	GC-rich sequence DNA-binding factor 2	GCFC2	S	96	APRADEGSESRTLDVSTDEEDKIHHSSESKD	0.995818
P16383	GC-rich sequence DNA-binding factor 2	GCFC2	T	97	PRADEGSESRTLDVSTDEEDKIHHSSESKDD	0.995574
Q8N0V5	N-acetyllactosaminide beta-1,6-N-acetylglucosaminyl-transferase, isoform A	GCNT2	T	247	VHQELLNHKNSYVIKTTKLKTPPPHDMVIYF	0.999473
Q8N0V5	N-acetyllactosaminide beta-1,6-N-acetylglucosaminyl-transferase, isoform A	GCNT2	T	248	HQELLNHKNSYVIKTTKLKTPPPHDMVIYFG	0.999468
Q8TB36	Ganglioside-induced differentiation-associated protein 1	GDAP1	S	11	_____MAERQEEQRGSPPLRAEGKADAEVKL	1
P50395	Rab GDP dissociation inhibitor beta	GDI2	T	12	____MNEEYDVIVLGTGLTECILSGIMSVNG	0.968232
P39905	Glial cell line-derived neurotrophic factor	GDNF	T	121	KGRRGQRGKNRGCVLTAIHLNVTDLGLGYET	0.999939
Q8TEQ6	Gem-associated protein 5	GEMIN5	S	757	KKKKKPTLRTPVKLESIDGNEEESMKENSGP	1
Q9NZ52	ADP-ribosylation factor-binding protein GGA3	GGA3	S	159	VQSDPPIPVDRTLIPSPPPRPKNPVFDDEEK	0.985232
P38435	Vitamin K-dependent gamma-carboxylase	GGCX	S	11	_____MAVSAGSARTSPSSDKVQKDKAELIS	0.955919
Q9NWU2	Glucose-induced degradation protein 8 homolog	GID8	S	2	______________MSYAEKPDEITKDEWME	0.999991
O75420	PERQ amino acid-rich with GYF domain-containing protein 1	GIGYF1	S	406	KEPPAAEDDIRGIQLSPGVGSSAGPPGDLED	0.997872
O75420	PERQ amino acid-rich with GYF domain-containing protein 1	GIGYF1	S	756	LLQQQQAVPVPPAPSSPPPLWAGLAKQGLSM	0.764342
Q14161	ARF GTPase-activating protein GIT2	GIT2	S	415	DTDLETTASKTNRQKSLDSDLSDGPVTVQEF	0.884156
Q53GS7	Nucleoporin GLE1	GLE1	S	88	STSASALDQPSFVPKSPDASSAFSPASPATP	0.999999
P10075	Zinc finger protein GLI4	GLI4	S	86	TFWPDSEPKPEQAPRSPGSQAPDEGAGGALR	0.987637
P00367	Glutamate dehydrogenase 1, mitochondrial;Glutamate dehydrogenase 2, mitochondrial	GLUD1;GLUD2	T	410	RVKAKIIAEGANGPTTPEADKIFLERNIMVI	0.824186
Q49A26-2	Putative oxidoreductase GLYR1	GLYR1	S	167	SERGSKSPLKRAQEQSPRKRGRPPKDEKDLT	1
Q49A26-2	Putative oxidoreductase GLYR1	GLYR1	S	130	EERSRPNSGDEKRKLSLSEGKVKKNMGEGKK	0.96826
Q9P107	GEM-interacting protein	GMIP	S	914	PITSVPRGSLRGRGPSPAAASPEGSPLRRTP	1
Q9P107	GEM-interacting protein	GMIP	S	919	PRGSLRGRGPSPAAASPEGSPLRRTPLPKHF	0.993777
P63092	Guanine nucleotide-binding protein G(s) subunit alpha isoforms short;Guanine nucleotide-binding protein G(s) subunit alpha isoforms XLas	GNAS	S	352	AKYFIRDEFLRISTASGDGRHYCYPHFTCAV	0.954551
P62873	Guanine nucleotide-binding protein G(I)/G(S)/G(T) subunit beta-1	GNB1	S	2	______________MSELDQLRQEAEQLKNQ	1
P63244	Guanine nucleotide-binding protein subunit beta-2-like 1;Guanine nucleotide-binding protein subunit beta-2-like 1, N-terminally processed	GNB2L1	S	276	LEGKIIVDELKQEVISTSSKAEPPQCTSLAW	0.759057
P59768	Guanine nucleotide-binding protein G(I)/G(S)/G(O) subunit gamma-2;Guanine nucleotide-binding protein subunit gamma	GNG2	T	6	__________MASNNTASIAQARKLVEQLKM	0.999889
P63218	Guanine nucleotide-binding protein G(I)/G(S)/G(O) subunit gamma-5	GNG5	S	5	___________MSGSSSVAAMKKVVQQLRLE	0.966911
P63218	Guanine nucleotide-binding protein G(I)/G(S)/G(O) subunit gamma-5	GNG5	S	6	__________MSGSSSVAAMKKVVQQLRLEA	0.978993
Q13439	Golgin subfamily A member 4	GOLGA4	S	266	LEPQAEVFTKEENPESDGEPVVEDGTSVKTL	1
Q13439	Golgin subfamily A member 4	GOLGA4	S	89	SLFRSPIKESLFRSSSKESLVRTSSRESLNR	0.896466
Q8TBA6	Golgin subfamily A member 5	GOLGA5	S	116	ASVPRPSSHFVRRKKSEPDDELLFDFLNSSQ	1
Q9H869-3	GON-4-like protein;YY1-associated protein 1	GON4L;YY1AP1	S	654	NAFQGLEPKLEPQELSPLSATVFPKVEHSPG	0.938705
Q9H8Y8	Golgi reassembly-stacking protein 2	GORASP2	T	222	FEEGKKISLPGQMAGTPITPLKDGFTEVQLS	0.990762
Q9H8Y8	Golgi reassembly-stacking protein 2	GORASP2	T	225	GKKISLPGQMAGTPITPLKDGFTEVQLSSVN	0.996557
P13224	Platelet glycoprotein Ib beta chain	GP1BB	S	191	RRLRARARARAAARLSLTDPLVAERAGTDES	0.999497
Q8IXQ4	GPALPP motifs-containing protein 1	GPALPP1	S	105	FFGPALPPGFKKQDDSPPRPIIGPALPPGFI	1
Q9BRR8	G patch domain-containing protein 1	GPATCH1	S	6	__________MAARDSDSEEDLVSYGTGLEP	1
Q9BRR8	G patch domain-containing protein 1	GPATCH1	S	8	________MAARDSDSEEDLVSYGTGLEPLE	1
Q9NW75	G patch domain-containing protein 2	GPATCH2	S	115	SKDYRENHNNNKKDHSDSDDQMLVAKRRPSS	1
Q9NW75	G patch domain-containing protein 2	GPATCH2	S	117	DYRENHNNNKKDHSDSDDQMLVAKRRPSSNL	1
Q9UKJ3	G patch domain-containing protein 8	GPATCH8	S	1107	LLLEKIQSRKVERKPSVSEEVQATPNKAGPK	0.982738
Q9HC44	Vasculin-like protein 1	GPBP1L1	S	49	PRGEGRFGVSRRRHNSSDGFFNNGPLRTAGD	0.986598
Q9HC44	Vasculin-like protein 1	GPBP1L1	T	354	ENRDCDKLEDLEDNSTPEPKENGEEGCHQNG	0.806653
Q9NQX3	Gephyrin;Molybdopterin adenylyltransferase;Molybdopterin molybdenumtransferase	GPHN	S	188	IVKVKEVHDELEDLPSPPPPLSPPPTTSPHK	0.999975
Q9NQX3	Gephyrin;Molybdopterin adenylyltransferase;Molybdopterin molybdenumtransferase	GPHN	S	194	VHDELEDLPSPPPPLSPPPTTSPHKQTEDKG	0.980096
Q96PE1	G-protein coupled receptor 124	GPR124	S	1107	PHAPPRALPAAAEDGSPVFGEGPPSLKSSPS	0.999937
Q15743	Ovarian cancer G-protein coupled receptor 1	GPR68	S	331	AREAYPLGAPEASGKSGAQGEEPELLTKLHP	1
C9JFE4	COP9 signalosome complex subunit 1	GPS1	S	448	MMLRAAVLRNQIHVKSPPREGSQGELTPANS	0.842606
Q9Y4H4	G-protein-signaling modulator 3	GPSM3	S	35	EEGWPPPNSTTRPWRSAPPSPPPPGTRHTAL	1
Q9Y4H4	G-protein-signaling modulator 3	GPSM3	S	39	PPPNSTTRPWRSAPPSPPPPGTRHTALGPRS	0.999784
Q14687	Genetic suppressor element 1	GSE1	S	826	VAQKRRKRRRMLRERSPSPPTIQSKRQTPSP	0.999955
Q14687	Genetic suppressor element 1	GSE1	S	828	QKRRKRRRMLRERSPSPPTIQSKRQTPSPRL	0.998614
P78417	Glutathione S-transferase omega-1	GSTO1	S	2	______________MSGESARSLGKGSAPPG	0.998909
P78347	General transcription factor II-I	GTF2I	S	674	SKINTKALQSPKRPRSPGSNSKVPEIEVTVE	0.999954
Q12789	General transcription factor 3C polypeptide 1	GTF3C1	S	1068	VRCPRVRKNSSTDQGSDEEGSLQKEQESAMD	0.999978
Q12789	General transcription factor 3C polypeptide 1	GTF3C1	S	739	KTSQPPVPQGEAEEDSQGKEGPSGSGDSQLS	1
Q12789	General transcription factor 3C polypeptide 1	GTF3C1	S	1062	NTPLGVVRCPRVRKNSSTDQGSDEEGSLQKE	0.950696
Q12789	General transcription factor 3C polypeptide 1	GTF3C1	S	1068	VRCPRVRKNSSTDQGSDEEGSLQKEQESAMD	0.999978
Q8WUA4	General transcription factor 3C polypeptide 2	GTF3C2	S	167	LLLKLSKDLDRPESQSPKRPPEDFETPSGER	0.999995
Q9Y5Q9	General transcription factor 3C polypeptide 3	GTF3C3	S	43	RKTREKKSLQEKGKLSAEENPDDSEVPSSSG	0.999345
Q9UKN8	General transcription factor 3C polypeptide 4	GTF3C4	S	611	LWKPTHEDSKILLVDSPGMGNADDEQQEEGT	1
Q969F1	General transcription factor 3C polypeptide 6	GTF3C6	S	9	_______MAAAADERSPEDGEDEEEEEQLVL	0.999995
Q9NYZ3	G2 and S phase-expressed protein 1	GTSE1	S	243	SIPGAAEKPKKEIPASPSRTKIPAEKESHRD	0.83231
Q9H116	GDNF-inducible zinc finger protein 1	GZF1	S	613	DKNTPWKSFLVIVDGSPKNDDGHKTEQPDEE	1
Q92522	Histone H1x	H1FX	S	31	GMAKKVTKAGGSAALSPSKKRKNSKKKNQPG	0.939564
Q92522	Histone H1x	H1FX	S	2	______________MSVELEEALPVTTAEGM	1
O75367	Core histone macro-H2A.1;Histone H2A	H2AFY	T	129	LAKKRGSKGKLEAIITPPPAKKAKSPSQKKP	1
O75367	Core histone macro-H2A.1	H2AFY	S	173	SKKKQGEVSKAASADSTTEGTPADGFTVLST	0.986602
Q71DI3	Histone H3;Histone H3.3;Histone H3.3C;Histone H3.1t;Histone H3.2;Histone H3.1	H3F3B;H3F3A;H3F3C;HIST3H3;HIST2H3PS2;HIST2H3A;HIST1H3A	S	58	RPGTVALREIRRYQKSTELLIRKLPFQRLMR;RPGTVALREIRRYQKSTELLIRKLPFQRLVR	0.864404
Q5JVS0	Intracellular hyaluronan-binding protein 4	HABP4	S	108	KERKSLPAPVAQRPDSPGGGLQAPGQKRTPR	0.999991
Q9P035	Very-long-chain (3R)-3-hydroxyacyl-CoA dehydratase 3	HACD3	S	135	LRAKEEERLNKLRLESEGSPETLTNLRKGYL	0.981255
Q8IYU2	E3 ubiquitin-protein ligase HACE1	HACE1	S	385	WLVLIATELMKNKRDSTEITSILLKQKGQDQ	0.88665
P12081	Histidine--tRNA ligase, cytoplasmic	HARS	S	27	KLQGERVRGLKQQKASAELIEEEVAKLLKLK	1
P51610	Host cell factor 1;HCF N-terminal chain 1;HCF N-terminal chain 2;HCF N-terminal chain 3;HCF N-terminal chain 4;HCF N-terminal chain 5;HCF N-terminal chain 6;HCF C-terminal chain 1;HCF C-terminal chain 2;HCF C-terminal chain 3;HCF C-terminal chain 4;HCF C-terminal chain 5;HCF C-terminal chain 6	HCFC1	S	6	__________MASAVSPANLPAVLLQPRWKR	0.999973
P51610	Host cell factor 1;HCF N-terminal chain 1;HCF N-terminal chain 2;HCF N-terminal chain 3;HCF N-terminal chain 4;HCF N-terminal chain 5;HCF N-terminal chain 6;HCF C-terminal chain 1;HCF C-terminal chain 2;HCF C-terminal chain 3;HCF C-terminal chain 4;HCF C-terminal chain 5;HCF C-terminal chain 6	HCFC1	S	2020	KDSSGTKPANKRPMSSPEMKSAPKKSKADGQ	0.763612
P51610	Host cell factor 1;HCF N-terminal chain 1;HCF N-terminal chain 2;HCF N-terminal chain 3;HCF N-terminal chain 4;HCF N-terminal chain 5;HCF N-terminal chain 6;HCF C-terminal chain 1;HCF C-terminal chain 2;HCF C-terminal chain 3;HCF C-terminal chain 4;HCF C-terminal chain 5;HCF C-terminal chain 6	HCFC1	S	666	TTVVGGVTKTITLVKSPISVPGGSALISNLG	0.999939
P14317	Hematopoietic lineage cell-specific protein	HCLS1	S	275	QVARRQQERKAVTKRSPEAPQPVIAMEEPAV	1
P56524	Histone deacetylase 4;Histone deacetylase 9;Histone deacetylase 5	HDAC4;HDAC9;HDAC5	S	246	GAQDAKDDFPLRKTASEPNLKVRSRLKQKVA;GMYDAKDDFPLRKTASEPNLKLRSRLKQKVA;GPYDSRDDFPLRKTASEPNLKVRSRLKQKVA	0.999989
Q9UQL6	Histone deacetylase 5	HDAC5	S	611	EEEEDCIQVKDEEGESGAEEGPDLEEPGAGY	1
P51858	Hepatoma-derived growth factor	HDGF	S	165	EKGALKRRAGDLLEDSPKRPKEAENPEGEEK	1
P51858	Hepatoma-derived growth factor	HDGF	S	239	ATKEDAEAPGIRDHESL______________	1
P51858	Hepatoma-derived growth factor	HDGF	S	132	EAAEGDGDKKGNAEGSSDEEGKLVIDEPAKE	1
P51858	Hepatoma-derived growth factor	HDGF	S	133	AAEGDGDKKGNAEGSSDEEGKLVIDEPAKEK	1
P51858	Hepatoma-derived growth factor	HDGF	S	107	NPTVKASGYQSSQKKSCVEEPEPEPEAAEGD	1
P51858	Hepatoma-derived growth factor	HDGF	S	132	EAAEGDGDKKGNAEGSSDEEGKLVIDEPAKE	1
P51858	Hepatoma-derived growth factor	HDGF	S	133	AAEGDGDKKGNAEGSSDEEGKLVIDEPAKEK	1
Q7Z4V5	Hepatoma-derived growth factor-related protein 2	HDGFRP2	S	454	KQQAKPVKVERTRKRSEGFSMDRKVEKKKEP	0.999724
Q00341	Vigilin	HDLBP	S	31	RSGLVPQQIKVATLNSEEESDPPTYKDAFPP	1
Q86XA9	HEAT repeat-containing protein 5A	HEATR5A	S	2021	AIKGNQESVKVKIPTSKYTKSPGKNSSIQLK	0.998396
Q86XA9	HEAT repeat-containing protein 5A	HEATR5A	S	2031	VKIPTSKYTKSPGKNSSIQLKTSFL______	0.999911
Q86XA9	HEAT repeat-containing protein 5A	HEATR5A	S	2032	KIPTSKYTKSPGKNSSIQLKTSFL_______	0.999948
Q6AI08	HEAT repeat-containing protein 6	HEATR6	S	643	KKAPAGPSLEETSVSSPKGSSEPCWLIRLCI	0.993218
Q9ULT8	E3 ubiquitin-protein ligase HECTD1	HECTD1	S	632	RLGVISKVSTLAGPSSDDENEEESKPEKEDE	0.854903
Q68CP4	Heparan-alpha-glucosaminide N-acetyltransferase	HGSNAT	S	243	ISSRETDRLINSELGSPSRTDPLDGDVQPAT	0.868101
Q9BW71	HIRA-interacting protein 3	HIRIP3	S	227	EGNKGTKSLKESEQESEEEILAQKKEQREEE	1
Q9BW71	HIRA-interacting protein 3	HIRIP3	S	125	DYFGPPAKNGVAAEVSPAKEENPRRASKAVE	1
Q9BW71	HIRA-interacting protein 3	HIRIP3	S	196	APGKASVSRKQAREESEESEAEPVQRTAKKV	0.999969
Q9BW71	HIRA-interacting protein 3	HIRIP3	S	223	AKKVEGNKGTKSLKESEQESEEEILAQKKEQ	1
Q9BW71	HIRA-interacting protein 3	HIRIP3	S	227	EGNKGTKSLKESEQESEEEILAQKKEQREEE	1
Q9BW71	HIRA-interacting protein 3	HIRIP3	S	196	APGKASVSRKQAREESEESEAEPVQRTAKKV	0.999969
Q9BW71	HIRA-interacting protein 3	HIRIP3	S	199	KASVSRKQAREESEESEAEPVQRTAKKVEGN	0.999843
Q9BW71	HIRA-interacting protein 3	HIRIP3	S	289	RSCKQKSQAKRLLGDSDSEEEQKEAASSGDD	1
Q9BW71	HIRA-interacting protein 3	HIRIP3	S	291	CKQKSQAKRLLGDSDSEEEQKEAASSGDDSG	1
P16401	Histone H1.5	HIST1H1B	S	44	AGAGAAKRKATGPPVSELITKAVAASKERNG	0.999208
P16401	Histone H1.5	HIST1H1B	S	2	______________MSETAPAETATPAPVEK	0.99051
P16401	Histone H1.5	HIST1H1B	S	18	ETAPAETATPAPVEKSPAKKKATKKAAGAGA	1
P16401	Histone H1.5	HIST1H1B	T	4	____________MSETAPAETATPAPVEKSP	0.986897
P16401	Histone H1.5	HIST1H1B	T	9	_______MSETAPAETATPAPVEKSPAKKKA	0.937502
P16401	Histone H1.5	HIST1H1B	T	11	_____MSETAPAETATPAPVEKSPAKKKATK	0.999723
P16401	Histone H1.5	HIST1H1B	S	2	______________MSETAPAETATPAPVEK	0.99051
P16401	Histone H1.5	HIST1H1B	T	4	____________MSETAPAETATPAPVEKSP	0.986897
P16401	Histone H1.5	HIST1H1B	T	9	_______MSETAPAETATPAPVEKSPAKKKA	0.937502
P16401	Histone H1.5	HIST1H1B	T	11	_____MSETAPAETATPAPVEKSPAKKKATK	0.999723
P16403	Histone H1.2	HIST1H1C	S	36	KKKAAKKAGGTPRKASGPPVSELITKAVAAS	1
P16403	Histone H1.2	HIST1H1C	S	41	KKAGGTPRKASGPPVSELITKAVAASKERSG	0.953366
P16403	Histone H1.2	HIST1H1C	S	2	______________MSETAPAAPAAAPPAEK	0.949387
P16403	Histone H1.2	HIST1H1C	T	146	PVGAAKKPKKAAGGATPKKSAKKTPKKAKKP	1
P16403	Histone H1.2	HIST1H1C	T	4	____________MSETAPAAPAAAPPAEKAP	0.812188
P16402	Histone H1.3	HIST1H1D	S	2	______________MSETAPLAPTIPAPAEK	0.906394
P16402	Histone H1.3	HIST1H1D	T	18	ETAPLAPTIPAPAEKTPVKKKAKKAGATAGK	0.999958
P16402	Histone H1.3	HIST1H1D	T	147	PAGAAKKPKKVAGAATPKKSIKKTPKKVKKP	1
P10412	Histone H1.4	HIST1H1E	S	2	______________MSETAPAAPAAPAPAEK	0.99989
P10412	Histone H1.4	HIST1H1E	T	146	PAGAAKKPKKATGAATPKKSAKKTPKKAKKP	1
P10412	Histone H1.4	HIST1H1E	T	18	ETAPAAPAAPAPAEKTPVKKKARKSAGAAKR	1
P10412	Histone H1.4;Histone H1.1;Histone H1t;Histone H1.5;Histone H1.3;Histone H1.2	HIST1H1E;HIST1H1A;HIST1H1T;HIST1H1B;HIST1H1D;HIST1H1C	S	104	SKGTLVQTKGTGASGSFKLNKKAASGEAKPK;SKGTLVQTKGTGASGSFKLNKKAASGEGKPK	0.991793
P10412	Histone H1.4;Histone H1.3	HIST1H1E;HIST1H1D	S	36	KKAKKAGATAGKRKASGPPVSELITKAVAAS;KKKARKSAGAAKRKASGPPVSELITKAVAAS	1
P10412	Histone H1.4;Histone H1.3	HIST1H1E;HIST1H1D	S	41	AGATAGKRKASGPPVSELITKAVAASKERSG;KSAGAAKRKASGPPVSELITKAVAASKERSG	0.953366
P10412	Histone H1.4;Histone H1.3;Histone H1.2	HIST1H1E;HIST1H1D;HIST1H1C	S	55	VSELITKAVAASKERSGVSLAALKKALAAAG	0.984824
P23527	Histone H2B type 1-O;Histone H2B type 1-B;Histone H2B type 2-E;Histone H2B type 1-J;Histone H2B type 1-H;Histone H2B type 2-F;Histone H2B type 1-L;Histone H2B type 1-A	HIST1H2BO;HIST1H2BB;HIST2H2BE;HIST1H2BJ;HIST1H2BH;HIST2H2BF;HIST1H2BL;HIST1H2BA	S	56	YVYKVLKQVHPDTGISSKAMGIMNSFVNDIF	0.907785
Q16695	Histone H3.1t	HIST3H3	S	29	GKAPRKQLATKVARKSAPATGGVKKPHRYRP	0.999992
Q8NCD3	Holliday junction recognition protein	HJURP	S	473	LPDSWAMNMYRGGPASPGGLQGLETRRLSLP	1
P08397	Porphobilinogen deaminase	HMBS	S	15	_MSGNGNAAATAEENSPKMRVIRVGTRKSQL	0.999999
P17096	High mobility group protein HMG-I/HMG-Y	HMGA1	S	103	KKLEKEEEEGISQESSEEEQ___________	0.999432
P17096	High mobility group protein HMG-I/HMG-Y	HMGA1	S	36	TEKRGRGRPRKQPPVSPGTALVGSQKEPSEV	0.999996
P17096	High mobility group protein HMG-I/HMG-Y	HMGA1	S	44	PRKQPPVSPGTALVGSQKEPSEVPTPKRPRG	0.999971
P17096	High mobility group protein HMG-I/HMG-Y	HMGA1	T	53	GTALVGSQKEPSEVPTPKRPRGRPKGSKNKG	0.998737
P26583	High mobility group protein B2	HMGB2	S	181	GKSEAGKKGPGRPTGSKKKNEPEDEEEEEEE	0.999978
P05114	Non-histone chromosomal protein HMG-14	HMGN1	S	7	_________MPKRKVSSAEGAAKEEPKRRSA	0.967666
P05114	Non-histone chromosomal protein HMG-14	HMGN1	S	8	________MPKRKVSSAEGAAKEEPKRRSAR	0.999925
P05114	Non-histone chromosomal protein HMG-14	HMGN1	S	86	KEDLPAENGETKTEESPASDEAGEKEAKSD_	0.999999
P05114	Non-histone chromosomal protein HMG-14	HMGN1	S	89	LPAENGETKTEESPASDEAGEKEAKSD____	1
P05114	Non-histone chromosomal protein HMG-14	HMGN1	S	86	KEDLPAENGETKTEESPASDEAGEKEAKSD_	0.999999
P05114	Non-histone chromosomal protein HMG-14	HMGN1	S	89	LPAENGETKTEESPASDEAGEKEAKSD____	1
Q15651	High mobility group nucleosome-binding domain-containing protein 3	HMGN3	S	78	KKEEKQEAGKEGTAPSENGETKAEEAQKTES	0.99877
Q9UGU5	HMG domain-containing protein 4	HMGXB4	S	497	SEGSMKVKASSVGVLSPQKKSPPTTMLLPAS	0.999999
Q9UGU5	HMG domain-containing protein 4	HMGXB4	S	502	KVKASSVGVLSPQKKSPPTTMLLPASPAKAP	0.999696
Q9UGU5	HMG domain-containing protein 4	HMGXB4	S	512	SPQKKSPPTTMLLPASPAKAPETEPIDVAAH	1
Q9UGU5	HMG domain-containing protein 4	HMGXB4	S	502	KVKASSVGVLSPQKKSPPTTMLLPASPAKAP	0.999696
Q9UGU5	HMG domain-containing protein 4	HMGXB4	S	512	SPQKKSPPTTMLLPASPAKAPETEPIDVAAH	1
Q92619	Minor histocompatibility protein HA-1;Minor histocompatibility antigen HA-1	HMHA1	S	23	ELMKTPSISKKNRAGSPSPQPSGELPRKDGA	0.973561
Q92619	Minor histocompatibility protein HA-1;Minor histocompatibility antigen HA-1	HMHA1	S	25	MKTPSISKKNRAGSPSPQPSGELPRKDGADA	0.781136
Q92619	Minor histocompatibility protein HA-1;Minor histocompatibility antigen HA-1	HMHA1	S	619	PAKDHRAGRGHQVHKSWPLSISDSDSGLDPG	0.999998
P30519	Heme oxygenase 2	HMOX2	S	2	______________MSAEVETSEGVDESEKK	0.999941
P09651	Heterogeneous nuclear ribonucleoprotein A1;Heterogeneous nuclear ribonucleoprotein A1, N-terminally processed	HNRNPA1	S	6	__________MSKSESPKEPEQLRKLFIGGL	1
P09651	Heterogeneous nuclear ribonucleoprotein A1;Heterogeneous nuclear ribonucleoprotein A1, N-terminally processed	HNRNPA1	S	4	____________MSKSESPKEPEQLRKLFIG	1
P09651	Heterogeneous nuclear ribonucleoprotein A1;Heterogeneous nuclear ribonucleoprotein A1, N-terminally processed	HNRNPA1	S	6	__________MSKSESPKEPEQLRKLFIGGL	1
P07910-2	Heterogeneous nuclear ribonucleoproteins C1/C2	HNRNPC	S	220	EKEQSKQAVEMKNDKSEEEQSSSSVKKDETN	1
P07910-2	Heterogeneous nuclear ribonucleoproteins C1/C2	HNRNPC	S	225	KQAVEMKNDKSEEEQSSSSVKKDETNVKMES	0.99699
P07910-2	Heterogeneous nuclear ribonucleoproteins C1/C2	HNRNPC	S	228	VEMKNDKSEEEQSSSSVKKDETNVKMESEGG	0.865638
Q14103	Heterogeneous nuclear ribonucleoprotein D0	HNRNPD	S	190	MKTKEPVKKIFVGGLSPDTPEEKIREYFGGF	0.993864
Q14103	Heterogeneous nuclear ribonucleoprotein D0	HNRNPD	S	83	IDASKNEEDEGHSNSSPRHSEAATAQREEWK	0.921608
O14979	Heterogeneous nuclear ribonucleoprotein D-like	HNRNPDL	S	241	LKGKEPPKKVFVGGLSPDTSEEQIKEYFGAF	0.985097
P31943	Heterogeneous nuclear ribonucleoprotein H;Heterogeneous nuclear ribonucleoprotein H, N-terminally processed;Heterogeneous nuclear ribonucleoprotein H2	HNRNPH1;HNRNPH2	S	104	NNVEMDWVLKHTGPNSPDTANDGFVRLRGLP;NSVEMDWVLKHTGPNSPDTANDGFVRLRGLP	0.99994
P61978-3	Heterogeneous nuclear ribonucleoprotein K	HNRNPK	S	260	GGRPMPPSRRDYDDMSPRRGPPPPPPGRGGR	1
P61978-3	Heterogeneous nuclear ribonucleoprotein K	HNRNPK	S	192	RVVECIKIILDLISESPIKGRAQPYDPNFYD	0.999999
P61978-3	Heterogeneous nuclear ribonucleoprotein K	HNRNPK	T	3	_____________METEQPEETFPNTETNGE	0.999971
P52272-2	Heterogeneous nuclear ribonucleoprotein M	HNRNPM	S	536	ANNLERMGLERMGANSLERMGLERMGANSLE	1
P52272-2	Heterogeneous nuclear ribonucleoprotein M	HNRNPM	S	29	TEIKMEEESGAPGVPSGNGAPGPKGEGERPA	1
P52272-2	Heterogeneous nuclear ribonucleoprotein M	HNRNPM	S	579	GIERMGLAMGGGGGASFDRAIEMERGNFGGS	1
Q00839	Heterogeneous nuclear ribonucleoprotein U	HNRNPU	S	3	_____________MSSSPVNVKKLKVSELKE	0.988564
Q00839	Heterogeneous nuclear ribonucleoprotein U	HNRNPU	S	4	____________MSSSPVNVKKLKVSELKEE	0.999997
Q00839	Heterogeneous nuclear ribonucleoprotein U	HNRNPU	T	554	VAGFKKQMADTGKLNTLLQRAPQCLGKFIEI	1
Q1KMD3	Heterogeneous nuclear ribonucleoprotein U-like protein 2	HNRNPUL2;HNRNPUL2-BSCL2	S	185	VPGDKAAEEQGDDQDSEKSKPAGSDGERRGV	1
Q1KMD3	Heterogeneous nuclear ribonucleoprotein U-like protein 2	HNRNPUL2;HNRNPUL2-BSCL2	S	597	DDVPESIMLEMKANFSLPEKCDYMDEVTYGE	1
Q1KMD3	Heterogeneous nuclear ribonucleoprotein U-like protein 2	HNRNPUL2;HNRNPUL2-BSCL2	S	161	EQGLGKREEDEPEERSGDETPGSEVPGDKAA	1
Q1KMD3	Heterogeneous nuclear ribonucleoprotein U-like protein 2	HNRNPUL2;HNRNPUL2-BSCL2	S	228	AYYEFREEAYHSRSKSPLPPEEEAKDEEEDQ	1
Q5SSJ5	Heterochromatin protein 1-binding protein 3	HP1BP3	S	6	__________MATDTSQGELVHPKALPLIVG	0.998173
Q5SSJ5	Heterochromatin protein 1-binding protein 3	HP1BP3	S	249	SRKTPQKSRNRKNRSSAVDPEPQVKLEDVLP	0.763281
Q5SSJ5	Heterochromatin protein 1-binding protein 3	HP1BP3	S	156	ASQLARAQKQTPMASSPRPKMDAILTEAIKA	0.806451
Q9UPZ3	Hermansky-Pudlak syndrome 5 protein	HPS5	S	563	SFVRKTTEKIGTLHTSPDLKVRPELRGDEQS	0.772917
Q9UPZ3	Hermansky-Pudlak syndrome 5 protein	HPS5	S	695	KKGILDEDNEKEKRDSLGNEESVDKTACECV	0.999999
Q53T59	HCLS1-binding protein 3	HS1BP3	S	194	EGPPVQSLKGEDAEESLEEEEALDPLGIMRS	0.999998
P07900	Heat shock protein HSP 90-alpha	HSP90AA1	S	263	EEKESEDKPEIEDVGSDEEEEKKDGDKKKKK	1
P07900	Heat shock protein HSP 90-alpha	HSP90AA1	S	231	YPITLFVEKERDKEVSDDEAEEKEDKEEEKE	1
P08238	Heat shock protein HSP 90-alpha;Heat shock protein HSP 90-beta;Heat shock protein HSP 90-alpha A2;Putative heat shock protein HSP 90-beta 2	HSP90AA1;HSP90AB1;HSP90AA2P;HSP90AB2P	T	104	TGIGMTKADLINNLGTIAKFQDQTEYLEEMQ;TGIGMTKADLINNLGTIAKSGTKAFMEALQA	1
P08238	Heat shock protein HSP 90-beta;Putative heat shock protein HSP 90-beta 2	HSP90AB1;HSP90AB2P	S	255	EDKDDEEKPKIEDVGSDEEDDSGKDKKKKTK;ENKDDEEKPKIEDVGSDEEDDSGKDKKKKTK	1
P08238	Heat shock protein HSP 90-beta;Putative heat shock protein HSP 90-beta-3	HSP90AB1;HSP90AB3P	S	226	YPITLYLEKEREKEISDDEAEEEKGEKEEED	1
P14625	Endoplasmin	HSP90B1	S	306	EPMEEEEAAKEEKEESDDEAAVEEEEEEKKP	1
P34932	Heat shock 70 kDa protein 4	HSPA4	S	647	LSGEYEKFVSEDDRNSFTLKLEDTENWLYED	0.999109
P04792	Heat shock protein beta-1	HSPB1	S	82	AVAAPAYSRALSRQLSSGVSEIRHTADRWRV	0.897452
P10809	60 kDa heat shock protein, mitochondrial	HSPD1	S	70	MGPKGRTVIIEQSWGSPKVTKDGVTVAKSID	0.999164
Q92598	Heat shock protein 105 kDa	HSPH1	S	557	PQVQTDAQQTSQSPPSPELTSEENKIPDADK	0.975729
O43719	HIV Tat-specific factor 1	HTATSF1	S	579	EFEENGLEKDLDEEGSEKELHENVLDKELEE	1
O43719	HIV Tat-specific factor 1	HTATSF1	S	529	ENGLAKESEDDLNKESEEEVGPTKESEEDDS	0.999978
O43719	HIV Tat-specific factor 1	HTATSF1	S	498	KESEEGNPVRGSEEDSPKKESKKKTLKNDCE	0.999989
O43719	HIV Tat-specific factor 1	HTATSF1	S	721	LFDEEEDSSEKLFDDSDERGTLGGFGSVEEG	1
O43719	HIV Tat-specific factor 1	HTATSF1	S	713	EDDDSNEKLFDEEEDSSEKLFDDSDERGTLG	1
O43719	HIV Tat-specific factor 1	HTATSF1	S	714	DDDSNEKLFDEEEDSSEKLFDDSDERGTLGG	1
O43719	HIV Tat-specific factor 1	HTATSF1	S	702	KEVEDADEKLFEDDDSNEKLFDEEEDSSEKL	1
O43719	HIV Tat-specific factor 1	HTATSF1	S	676	KKAEEGDADEKLFEESDDKEDEDADGKEVED	1
O43719	HIV Tat-specific factor 1	HTATSF1	S	642	KEEEEDTYEKVFDDESDEKEDEEYADEKGLE	1
O43719	HIV Tat-specific factor 1	HTATSF1	S	616	EFEDDGSEKVLDEEGSEREFDEDSDEKEEEE	1
O43719	HIV Tat-specific factor 1	HTATSF1	S	713	EDDDSNEKLFDEEEDSSEKLFDDSDERGTLG	1
O43719	HIV Tat-specific factor 1	HTATSF1	S	714	DDDSNEKLFDEEEDSSEKLFDDSDERGTLGG	1
P42858	Huntingtin	HTT	S	1199	KGKEKEPGEQASVPLSPKKGSEASAASRQSD	0.999901
P42858	Huntingtin	HTT	S	1874	KRHSLSSTKLLSPQMSGEEEDSDLAAKLGMC	0.999997
Q7Z6Z7	E3 ubiquitin-protein ligase HUWE1	HUWE1	S	2887	GDTSAAGSSEQPRAGSSTPGDAPPAVAEVQG	0.797081
Q7Z6Z7	E3 ubiquitin-protein ligase HUWE1	HUWE1	S	2362	ELEDLIDELLERDGGSGNSTIIVSRSGEDES	0.999627
Q7Z6Z7	E3 ubiquitin-protein ligase HUWE1	HUWE1	S	2940	SSSTRDSAVAISGADSRGILEEPLPSTSSEE	0.851769
Q7Z6Z7	E3 ubiquitin-protein ligase HUWE1	HUWE1	S	1907	CIRIALPAPRGSGTASDDEFENLRIKGPNAV	1
Q7Z6Z7	E3 ubiquitin-protein ligase HUWE1	HUWE1	T	1722	SKEMDIKRKENKGNDTPLALESTNTEKETSL	1
H3BR88		IFI16	S	10	______MSTAMGRSPSPKTSLSAPPNSSSTE	0.943312
Q16666	Gamma-interferon-inducible protein 16	IFI16	S	153	GPKGSKVSEEQTQPPSPAGAGMSTAMGRSPS	0.999262
Q16666	Gamma-interferon-inducible protein 16	IFI16	S	168	SPAGAGMSTAMGRSPSPKTSLSAPPNSSSTE	0.781715
Q16666	Gamma-interferon-inducible protein 16	IFI16	S	153	GPKGSKVSEEQTQPPSPAGAGMSTAMGRSPS	0.999262
P17181	Interferon alpha/beta receptor 1	IFNAR1	S	495	EYFSEQPLKNLLLSTSEEQIEKCFIIENIST	0.975023
Q9NZI8	Insulin-like growth factor 2 mRNA-binding protein 1	IGF2BP1	S	181	GRRGGFGSRGQPRQGSPVAAGAPAKQQQVDI	1
Q9Y6M1	Insulin-like growth factor 2 mRNA-binding protein 2	IGF2BP2	S	164	SFKISYIPDEEVSSPSPPQRAQRGDHSSREQ	0.966622
P11717	Cation-independent mannose-6-phosphate receptor	IGF2R	S	2409	KSVKALSSLHGDDQDSEDEVLTIPEVKVHSG	1
P11717	Cation-independent mannose-6-phosphate receptor	IGF2R	S	2484	QKTVSSTKLVSFHDDSDEDLLHI________	1
P11717	Cation-independent mannose-6-phosphate receptor	IGF2R	S	2401	QENGHITTKSVKALSSLHGDDQDSEDEVLTI	0.833125
P11717	Cation-independent mannose-6-phosphate receptor	IGF2R	S	2409	KSVKALSSLHGDDQDSEDEVLTIPEVKVHSG	1
O95163	Elongator complex protein 1	IKBKAP	S	471	CPSADPTVKLGAVGGSGFKVCLRTPHLEKRY	1
O14920	Inhibitor of nuclear factor kappa-B kinase subunit beta	IKBKB	Y	571	QGGTLDDLEEQARELYRRLREKPRDQRTEGD	0.999859
Q9NP60	X-linked interleukin-1 receptor accessory protein-like 2	IL1RAPL2	S	275	PLNIPCKAFFGFSGESGPMIYWMKGEKFIEE	0.999964
Q9NP60	X-linked interleukin-1 receptor accessory protein-like 2	IL1RAPL2	Y	280	CKAFFGFSGESGPMIYWMKGEKFIEELAGHI	0.999962
P26951	Interleukin-3 receptor subunit alpha	IL3RA	S	348	RLFPRIPHMKDPIGDSFQNDKLVVWEAGKAG	1
Q12906-7	Interleukin enhancer-binding factor 3	ILF3	S	62	DWIDEQEKGSSEQAESDNMDVPPEDDSKEGA	0.965458
Q12906-7	Interleukin enhancer-binding factor 3	ILF3	S	476	VLQDMGLPTGAEGRDSSKGEDSAEETEAKPA	0.969938
Q12906-7	Interleukin enhancer-binding factor 3	ILF3	T	596	KAYAALAALEKLFPDTPLALDANKKKRAPVP	1
Q9H0C8	Integrin-linked kinase-associated serine/threonine phosphatase 2C	ILKAP;ILKAP3;ILKAP2	S	13	___MDLFGDLPEPERSPRPAAGKEAQKGPLL	1
P12268	Inosine-5'-monophosphate dehydrogenase 2	IMPDH2	S	444	RYFSEADKIKVAQGVSGAVQDKGSIHKFVPY	1
P12268	Inosine-5'-monophosphate dehydrogenase 2	IMPDH2	S	416	FFSDGIRLKKYRGMGSLDAMDKHLSSQNRYF	1
Q9NQS7	Inner centromere protein	INCENP	S	263	VGTGRSASKLRIAQVSPGPRDSPAFPDSPWR	1
Q9UNL4	Inhibitor of growth protein 4	ING4	S	150	QKEKKAARARSKGKNSDEEAPKTAQKKLKLV	1
Q8WYH8	Inhibitor of growth protein 5	ING5	S	118	DLARFEADLKDKMEGSDFESSGGRGLKKGRG	1
Q8WYH8	Inhibitor of growth protein 5	ING5	S	148	GQKEKRGSRGRGRRTSEEDTPKKKKHKGGSE	0.794593
Q9C086	INO80 complex subunit B	INO80B;INO80B-WBP1	S	351	RINLQMRLGGPEGPGSPLLAT__________	1
Q92835	Phosphatidylinositol 3,4,5-trisphosphate 5-phosphatase 1	INPP5D	S	971	CRGESPPTPPGQPPISPKKFLPSTANRGLPP	1
Q92835	Phosphatidylinositol 3,4,5-trisphosphate 5-phosphatase 1	INPP5D	S	934	GPFGPPMPLHVKQTLSPDQQPTAWSYDQPPK	0.998315
Q92835	Phosphatidylinositol 3,4,5-trisphosphate 5-phosphatase 1	INPP5D	T	1108	EGRAAGGDKSQGKPKTPVSSQAPVPAKRPIK	0.999899
Q92835	Phosphatidylinositol 3,4,5-trisphosphate 5-phosphatase 1	INPP5D	S	971	CRGESPPTPPGQPPISPKKFLPSTANRGLPP	1
Q92835	Phosphatidylinositol 3,4,5-trisphosphate 5-phosphatase 1	INPP5D	T	963	PKDSPLGPCRGESPPTPPGQPPISPKKFLPS	0.949063
O15357	Phosphatidylinositol 3,4,5-trisphosphate 5-phosphatase 2	INPPL1	S	132	VEGEREPDPPDDRDASDGEDEKPPLPPRSGS	1
Q8N201	Integrator complex subunit 1	INTS1	S	307	EEDSQTELLIAEEKLSPEQEGQLMPRYEELA	1
Q8N201	Integrator complex subunit 1	INTS1	S	104	LGRLAEAAVAEKRAISPSIKEPSVVPIEVLP	0.997928
Q8N201	Integrator complex subunit 1	INTS1	T	83	ASALTGLTKRPKLSSTPPLSALGRLAEAAVA	0.812735
Q8WWN9	Interactor protein for cytohesin exchange factors 1	IPCEF1;CNKSR3	S	429	PDDTDDTPQELKKSPSSPSVENSI_______	0.835207
Q15051	IQ calmodulin-binding motif-containing protein 1	IQCB1	S	572	LKHIQAPWWKKLGEESGDEIDVPKDELSIEL	1
Q96DY2	IQ domain-containing protein D	IQCD	T	272	HLHQVLKFSENSLVRTKQEAEKQQKADFRAS	0.999498
Q8IU81	Interferon regulatory factor 2-binding protein 1	IRF2BP1	S	384	APSRNLAPTPRRRKASPEPEGEAAGKMTTEE	1
Q8IU81	Interferon regulatory factor 2-binding protein 1	IRF2BP1	S	436	SPIAALKNVAEALGHSPKDPGGGGGPVRAGG	1
Q7Z5L9-2	Interferon regulatory factor 2-binding protein 2	IRF2BP2	S	175	NGFSKLEEPPELNRQSPNPRRGHAVPPTLVP	1
Q7Z5L9-2	Interferon regulatory factor 2-binding protein 2	IRF2BP2	S	344	NGSKAVARTARKRKPSPEPEGEVGPPKINGE;PALTAVARTARKRKPSPEPEGEVGPPKINGE	1
Q7Z5L9-2	Interferon regulatory factor 2-binding protein 2	IRF2BP2	S	240	GSAQPTDLGAHKRPASVSSSAAVEHEQREAA	0.91639
Q9H1B7	Interferon regulatory factor 2-binding protein-like	IRF2BPL	S	547	PSGRGAAASLRKRKASPEPPDSAEGALKLGE	1
P35568	Insulin receptor substrate 1	IRS1	S	3	_____________MASPPESDGFSDVRKVGY	0.999947
Q9Y4H2	Insulin receptor substrate 2	IRS2	S	608	ASLDEYTLMRATFSGSAGRLCPSCPASSPKV	0.954324
Q9Y4H2	Insulin receptor substrate 2	IRS2	S	560	MDRPLSHCGRSYRRVSGDAAQDLDRGLRKRT	1
P78411	Iroquois-class homeodomain protein IRX-5	IRX5	S	248	QGPPTPAGKETEGSLSDSDFKEPPSEGRLDA	0.942025
P78411	Iroquois-class homeodomain protein IRX-5	IRX5	S	246	RLQGPPTPAGKETEGSLSDSDFKEPPSEGRL	0.812333
P78411	Iroquois-class homeodomain protein IRX-5	IRX5	S	248	QGPPTPAGKETEGSLSDSDFKEPPSEGRLDA	0.942025
Q9H1K1	Iron-sulfur cluster assembly enzyme ISCU, mitochondrial	ISCU	S	14	__MAAAGAFRLRRAASALLLRSPRLPARELS	1
Q96A47	Insulin gene enhancer protein ISL-2	ISL2	S	157	DHGLLLERAAAGSPRSPGPLPGARGLHLPDA	1
Q9H0X4	Protein ITFG3	ITFG3	S	21	DLEAEIHPLKNEERKSQENLGNPSKNEDNVK	1
P08648	Integrin alpha-5;Integrin alpha-5 heavy chain;Integrin alpha-5 light chain	ITGA5	S	1047	YGTAMEKAQLKPPATSDA_____________	0.839351
P08648	Integrin alpha-5;Integrin alpha-5 heavy chain;Integrin alpha-5 light chain	ITGA5	S	127	EFDSKGSRLLESSLSSSEGEEPVEYKSLQWF	0.916103
Q14643	Inositol 1,4,5-trisphosphate receptor type 1	ITPR1	S	1598	AMNWRLSARNAARRDSVLAASRDYRNIIERL	1
Q96ST2	Protein IWS1 homolog	IWS1	S	398	EGEEEKVAKRKAAVLSDSEDEEKASAKKSRV	1
Q96ST2	Protein IWS1 homolog	IWS1	S	400	EEEKVAKRKAAVLSDSEDEEKASAKKSRVVS	1
Q96ST2	Protein IWS1 homolog	IWS1	S	313	RVSDSESEGPQKGPASDSETEDASRHKQKPE	0.998768
Q96ST2	Protein IWS1 homolog	IWS1	S	157	HASDSENEDVGKHPASDSEIEELQKSPASDS	1
Q96ST2	Protein IWS1 homolog	IWS1	S	398	EGEEEKVAKRKAAVLSDSEDEEKASAKKSRV	1
Q96ST2	Protein IWS1 homolog	IWS1	S	400	EEEKVAKRKAAVLSDSEDEEKASAKKSRVVS	1
Q96ST2	Protein IWS1 homolog	IWS1	S	313	RVSDSESEGPQKGPASDSETEDASRHKQKPE	0.998768
Q96ST2	Protein IWS1 homolog	IWS1	S	315	SDSESEGPQKGPASDSETEDASRHKQKPESD	0.970379
Q96ST2	Protein IWS1 homolog	IWS1	S	157	HASDSENEDVGKHPASDSEIEELQKSPASDS	1
Q96ST2	Protein IWS1 homolog	IWS1	S	159	SDSENEDVGKHPASDSEIEELQKSPASDSET	1
Q96ST2	Protein IWS1 homolog	IWS1	S	438	DAVSDKSGKREKTIASDSEEEAGKELSDKKN	0.999774
Q96ST2	Protein IWS1 homolog	IWS1	S	440	VSDKSGKREKTIASDSEEEAGKELSDKKNEE	0.999949
Q6IE81	Protein Jade-1	JADE1	S	603	VHSLKKPHKRDPLQNSPGSEGKTLLKQPDLC	0.993114
Q6IE81	Protein Jade-1	JADE1	S	743	VNYNQTAVKVPTTPASPVKNWGGFRIPKKGE	0.999883
Q92833	Protein Jumonji	JARID2	S	78	LGNDQSKGLGPASEQSENEKDDASQVSSTSN	0.999986
Q8WYK2	Jun dimerization protein 2	JDP2	T	148	NRHRPTCIVRTDSVKTPESEGNPLLEQLEKK	0.99965
Q15652	Probable JmjC domain-containing histone demethylation protein 2C	JMJD1C	S	617	PLSAVSVMEDKLHKRSPPPETIKSKLNTSVD	1
Q15652	Probable JmjC domain-containing histone demethylation protein 2C	JMJD1C	T	505	TMELLPKEKFVSRPPTPKCVIDITNDTNLEK	0.99673
P17535	Transcription factor jun-D	JUND	S	259	QTVPDVPSFGESPPLSPIDMDTQERIKAERK	0.998058
Q63ZY3	KN motif and ankyrin repeat domain-containing protein 2	KANK2	S	19	VLHVPAPFPGTPGPASPPAFPAKDPDPPYSV	0.999917
O75449	Katanin p60 ATPase-containing subunit A1	KATNA1	S	170	REKKEQNKGREEKNKSPAAVTEPETNKFDST	1
O94819	Kelch repeat and BTB domain-containing protein 11	KBTBD11	S	310	HLLAAALGPAGERAGSRPQSPSGDADARGDA	0.999682
O94819	Kelch repeat and BTB domain-containing protein 11	KBTBD11	S	314	AALGPAGERAGSRPQSPSGDADARGDAAVYC	0.969389
Q13303-2	Voltage-gated potassium channel subunit beta-2	KCNAB2	S	9	_______MYPESTTGSPARLSLRQTGSPGMI	0.953829
Q96CX2	BTB/POZ domain-containing protein KCTD12	KCTD12	S	185	ASAGAPSPTLELASRSPSGGAAGPLLTPSQS	0.85171
Q9Y2K7	Lysine-specific demethylase 2A	KDM2A	S	692	QEDSSEKAQKRKMEESDEEAVQAKVLRPLRS	1
Q8NHM5	Lysine-specific demethylase 2B	KDM2B	S	951	RRKRRLPNKELSRELSKELNHEIQRTENSLA	0.999965
Q8NHM5	Lysine-specific demethylase 2B	KDM2B	S	474	KKPKAPALRFLKRTLSNESEESVKSTTLAVD	0.791723
Q8NHM5	Lysine-specific demethylase 2B	KDM2B	S	474	KKPKAPALRFLKRTLSNESEESVKSTTLAVD	0.791723
Q8NHM5	Lysine-specific demethylase 2B	KDM2B	S	497	KSTTLAVDYPKTPTGSPATEVSAKWTHLTEF	0.999727
Q8NHM5	Lysine-specific demethylase 2B	KDM2B	T	493	EESVKSTTLAVDYPKTPTGSPATEVSAKWTH	0.998696
Q9Y4C1	Lysine-specific demethylase 3A	KDM3A	S	325	PSKDPRQQSTPQAANSPPNLGAKIPQGCHKQ	0.999976
Q9Y4C1	Lysine-specific demethylase 3A	KDM3A	S	445	IANPPELQKHLEHAPSPSDVSNAPEVKAGVN	0.994063
Q9Y4C1	Lysine-specific demethylase 3A	KDM3A	S	264	VTCGNSARIGAVKRKSSENNGTLVSKQAKSC	0.938481
Q9Y4C1	Lysine-specific demethylase 3A	KDM3A	S	265	TCGNSARIGAVKRKSSENNGTLVSKQAKSCS	0.812122
Q7LBC6	Lysine-specific demethylase 3B	KDM3B	S	278	TLKAVKSSKGKKKRESIEGKDGRRRKSASDS	1
O94953	Lysine-specific demethylase 4B	KDM4B	S	566	FEHFAQKGPTWKEPVSPMELTGPEDGAASSG	0.999941
P41229	Lysine-specific demethylase 5C	KDM5C	S	1359	MPKVQGLLENGDSVTSPEKVAPEEGSGKRDL	0.958924
P41229	Lysine-specific demethylase 5C	KDM5C	T	1358	DMPKVQGLLENGDSVTSPEKVAPEEGSGKRD	0.773179
Q07666	KH domain-containing, RNA-binding, signal transduction-associated protein 1	KHDRBS1	S	20	DDPAARMSRSSGRSGSMDPSGAHPSVRQTPS	0.828377
Q92945	Far upstream element-binding protein 2	KHSRP	S	480	PPNGDPNFKLFIIRGSPQQIDHAKQLIEEKI	1
Q92945	Far upstream element-binding protein 2	KHSRP	S	181	QINKIQQDSGCKVQISPDSGGLPERSVSLTG	0.999236
Q14667	Protein KIAA0100	KIAA0100	S	2199	KSATGSEVRGKLETKSDLNMQQQEEEEKARL	1
Q14667	Protein KIAA0100	KIAA0100	S	2094	QGLTRSSGVRRSFRKSPEHPVDDIDKMKERA	1
Q14667	Protein KIAA0100	KIAA0100	T	2197	RLKSATGSEVRGKLETKSDLNMQQQEEEEKA	1
Q9BVV6	Protein TALPID3	KIAA0586	S	183	TAAAIATAAPLIKVQSDLEAKVNSVTELLSK	1
Q2KHM9	Uncharacterized protein KIAA0753	KIAA0753	S	568	RKAPWIPPNPTSPPASPKCAAWLKVKTSPRD	0.995248
Q2LD37	Uncharacterized protein KIAA1109	KIAA1109	S	2755	EPTCKVVFENEQDNSSLTKTQRKRSLVTSEP	0.948058
Q86T90	Uncharacterized protein KIAA1328	KIAA1328	S	484	PQRGTVTGVRKDASTSPMPTGSLKDFVTTAS	0.987071
Q69YN4	Protein virilizer homolog	KIAA1429	S	173	NPKHADGEKEDQFNGSPPRPQPRGPRTPPGP	1
Q9P266	Junctional protein associated with coronary artery disease	KIAA1462	S	1044	GAGLPLSLSNKNRGLSAPDLRSVGLTPGQEQ	1
Q9P260	LisH domain and HEAT repeat-containing protein KIAA1468	KIAA1468	S	170	AAGVGGAGGREPSTASGGGQLNRAGSISTLD	0.989167
A0A087X211	Protein CIP2A	KIAA1524	T	809	QLVDREHKLANLHQKTKVQEEKIKTLQKERE	1
A0MZ66	Shootin-1	KIAA1598	S	494	RILRRRKVTAEADSSSPTGILATSESKSMPV	0.99567
P52732	Kinesin-like protein KIF11	KIF11	T	926	CFLEQDLKLDIPTGTTPQRKSYLYPSTLVRT	0.846156
Q9NQT8	Kinesin-like protein KIF13B	KIF13B	S	1381	KEQLTGKGKLSRRSISSPNVNRLSGSRQDLI	0.975079
O43896	Kinesin-like protein KIF1C	KIF1C	S	1033	RRPPSPRRSHHPRRNSLDGGGRSRGAGSAQP	1
Q96Q89	Kinesin-like protein KIF20B	KIF20B	S	1740	KKEGTLQKFGDFLQHSPSILQSKAKKIIETM	0.812902
O75037	Kinesin-like protein KIF21B	KIF21B	S	1215	TRGSTFPRQSRATETSPLTRRKSYDRGQPIR	0.955961
O75037	Kinesin-like protein KIF21B	KIF21B	S	1167	CLGPPLDISTKNITKSLASLVEIKEDGVGFS	0.999946
Q9BW19	Kinesin-like protein KIFC1	KIFC1	S	6	__________MDPQRSPLLEVKGNIELKRPL	1
Q07866-6	Kinesin light chain 1	KLC1	S	591	SRESEPKNPGMKRASSLNVLNVGGKAAEDRF	0.858702
Q07866-6	Kinesin light chain 1	KLC1	S	460	SFGEYGGWYKACKVDSPTVTTTLKNLGALYR	0.999722
Q9UMN6	Histone-lysine N-methyltransferase 2B	KMT2B	S	821	IDQQQQQKVAASMPLSPGGQMEEVAGAVKQI	1
Q8NEZ4	Histone-lysine N-methyltransferase 2C	KMT2C	S	4034	PDLSLVKEEPPEPVPSPIIPILPSTAGKSSE	0.999971
Q8NEZ4	Histone-lysine N-methyltransferase 2C	KMT2C	S	89	TTETETIVETEIKEQSAEEDAEAEVDNSKQL	1
Q8NEZ4	Histone-lysine N-methyltransferase 2C	KMT2C	S	4267	AKNSENKESIPSLPQSPMRETPSKAFHQYSN	0.934926
O14686	Histone-lysine N-methyltransferase 2D	KMT2D	S	4738	PHLGSGRWEQEDRALSPVIPLIPRASIPVFP	1
O14686	Histone-lysine N-methyltransferase 2D	KMT2D	S	2274	ESPGVGGGKASEPLLSPPPFGESRKALEVKK	1
O14686	Histone-lysine N-methyltransferase 2D	KMT2D	S	1671	GVEHMECEIKLEGPVSPDVEPGKEETEESKK	1
O14686	Histone-lysine N-methyltransferase 2D	KMT2D	S	4849	EAEGPGGKEKGLEGKSPDTGPDWLKQFDAVL	0.999938
Q8IZD2	Histone-lysine N-methyltransferase 2E	KMT2E	T	1147	GFGRTVNDNLIDGNCTPQNPPQKKKVSLLEY	0.999786
O00505	Importin subunit alpha-4	KPNA3	S	60	LLKKRNVPQEESLEDSDVDADFKAQNVTLEA	0.999994
O60684	Importin subunit alpha-7	KPNA6	S	6	__________METMASPGKDNYRMKSYKNNA	0.999998
Q13601	KRR1 small subunit processome component homolog	KRR1	S	5	___________MASPSLERPEKGAGKSEFRN	0.999941
K7EMS3		KRT19	S	2	______________MSVEADINGLRRVLDEL	1
Q86UP2	Kinectin	KTN1	S	75	KKNKKKEIQNGNLHESDSESVPRDFKLSDAL	0.935683
Q969R5	Lethal(3)malignant brain tumor-like protein 2	L3MBTL2	S	689	VKEEHLDVASPDKASSPELPVSVENIKQETD	0.957536
Q16363	Laminin subunit alpha-4	LAMA4	S	364	LLSDVEELVEKENQASRKGQLVQKESMDTIN	1
Q6IAA8	Ragulator complex protein LAMTOR1	LAMTOR1	S	27	SDQDREERKLLLDPSSPPTKALNGAEPNYHS	0.990152
Q6PKG0	La-related protein 1	LARP1	S	517	CPEFVPRQHYQKETESAPGSPRAVTPVPTKT	0.999329
Q6PKG0	La-related protein 1	LARP1	S	521	VPRQHYQKETESAPGSPRAVTPVPTKTEEVS	0.999999
Q6PKG0	La-related protein 1	LARP1	S	548	EEVSNLKTLPKGLSASLPDLDSENWIEVKKR	0.999754
Q6PKG0	La-related protein 1	LARP1	S	143	TKNALPPVLTTVNGQSPPEHSAPAKVVRAAV	0.997021
Q6PKG0	La-related protein 1	LARP1	S	627	EMEQMDGRKNTFTAWSDEESDYEIDDRDVNK	1
Q6PKG0	La-related protein 1	LARP1	T	526	YQKETESAPGSPRAVTPVPTKTEEVSNLKTL	1
Q6PKG0	La-related protein 1	LARP1	T	376	YQFGYRKFDGVEGPRTPKYMNNITYYFDNVS	1
Q6PKG0	La-related protein 1	LARP1	S	517	CPEFVPRQHYQKETESAPGSPRAVTPVPTKT	0.999329
Q6PKG0	La-related protein 1	LARP1	S	521	VPRQHYQKETESAPGSPRAVTPVPTKTEEVS	0.999999
Q6PKG0	La-related protein 1	LARP1	T	515	LNCPEFVPRQHYQKETESAPGSPRAVTPVPT	0.877908
Q6PKG0	La-related protein 1	LARP1	T	526	YQKETESAPGSPRAVTPVPTKTEEVSNLKTL	1
Q6PKG0	La-related protein 1	LARP1	S	517	CPEFVPRQHYQKETESAPGSPRAVTPVPTKT	0.999329
Q6PKG0	La-related protein 1	LARP1	S	521	VPRQHYQKETESAPGSPRAVTPVPTKTEEVS	0.999999
Q6PKG0	La-related protein 1	LARP1	T	526	YQKETESAPGSPRAVTPVPTKTEEVSNLKTL	1
Q71RC2	La-related protein 4	LARP4	S	722	GVTRRNGKEQYVPPRSPK_____________	0.999993
Q92615	La-related protein 4B	LARP4B	S	664	SYAEICQRTSKEPPSSPLQPQKEQKPNTVGC	0.867139
Q92615	La-related protein 4B	LARP4B	S	736	AMGKRLSREQSTPPKSPQ_____________	0.999892
Q4G0J3	La-related protein 7	LARP7	S	337	KEASEASKENRDIEISTEEEKDTGDLKDSSL	1
Q4G0J3	La-related protein 7	LARP7	S	261	TSISKMKRSRPTSEGSDIESTEPQKQCSKKK	0.969641
Q4G0J3	La-related protein 7	LARP7	T	338	EASEASKENRDIEISTEEEKDTGDLKDSSLL	1
Q4G0J3	La-related protein 7	LARP7	S	337	KEASEASKENRDIEISTEEEKDTGDLKDSSL	1
Q4G0J3	La-related protein 7	LARP7	S	261	TSISKMKRSRPTSEGSDIESTEPQKQCSKKK	0.969641
Q4G0J3	La-related protein 7	LARP7	T	338	EASEASKENRDIEISTEEEKDTGDLKDSSLL	1
Q4G0J3	La-related protein 7	LARP7	T	257	DTSNTSISKMKRSRPTSEGSDIESTEPQKQC	0.940499
Q9Y4W2	Ribosomal biogenesis protein LAS1L	LAS1L	S	560	SFGSEAKAQQQEEQGSVNDVKEEEKEEKEVL	1
O43561	Linker for activation of T-cells family member 1	LAT	S	84	SYPPLSQPDLLPIPRSPQPLGGSHRTPSSRR	1
O95835	Serine/threonine-protein kinase LATS1	LATS1	S	613	ENVDSGDKEKKQITTSPITVRKNKKDEERRE	0.794265
Q96JN0	Ligand-dependent corepressor	LCOR	S	42	STKNQSLPKASPVTTSPTAATTQNPVLSKLL	0.97338
P13796	Plastin-2	LCP1	S	5	___________MARGSVSDEEMMELREAFAK	0.999963
P13796	Plastin-2	LCP1	S	257	LSRNEALIALLREGESLEDLMKLSPEELLLR	1
P13796	Plastin-2	LCP1	S	290	NYHLENAGCNKIGNFSTDIKDSKAYYHLLEQ	0.851354
P13796	Plastin-2	LCP1	T	106	RKAINKKEGICAIGGTSEQSSVGTQHSYSEE	0.757492
P13796	Plastin-2	LCP1	T	186	VPDTIDERTINKKKLTPFTIQENLNLALNSA	0.86829
P00338	L-lactate dehydrogenase A chain	LDHA	Y	239	KEQWKEVHKQVVESAYEVIKLKGYTSWAIGL	0.907782
P07195	L-lactate dehydrogenase B chain	LDHB	Y	240	SENWKEVHKMVVESAYEVIKLKGYTNWAIGL	0.815503
Q8WVC0	RNA polymerase-associated protein LEO1	LEO1	S	212	SDDERQQLSEEEKANSDDERPVASDNDDEKQ	1
Q8WVC0	RNA polymerase-associated protein LEO1	LEO1	S	630	EEDKAQRLLKAKKLTSDEEGEPSGKRKAEDD	1
Q8WVC0	RNA polymerase-associated protein LEO1	LEO1	S	658	EDDDKANKKHKKYVISDEEEEDDD_______	1
Q8WVC0	RNA polymerase-associated protein LEO1	LEO1	S	179	DEERAQGSDEDKLQNSDDDEKMQNTDDEERP	1
Q8WVC0	RNA polymerase-associated protein LEO1	LEO1	S	300	RMKRKNAIASDSEADSDTEVPKDNSGTMDLF	0.965872
Q8WVC0	RNA polymerase-associated protein LEO1	LEO1	S	630	EEDKAQRLLKAKKLTSDEEGEPSGKRKAEDD	1
Q8WVC0	RNA polymerase-associated protein LEO1	LEO1	S	294	SEDEVLRMKRKNAIASDSEADSDTEVPKDNS	1
Q8WVC0	RNA polymerase-associated protein LEO1	LEO1	S	296	DEVLRMKRKNAIASDSEADSDTEVPKDNSGT	1
Q8WVC0	RNA polymerase-associated protein LEO1	LEO1	S	300	RMKRKNAIASDSEADSDTEVPKDNSGTMDLF	0.965872
Q8WVC0	RNA polymerase-associated protein LEO1	LEO1	T	629	SEEDKAQRLLKAKKLTSDEEGEPSGKRKAED	1
P18858	DNA ligase 1;DNA ligase	LIG1	S	66	SPVKRPGRKAARVLGSEGEEEDEALSPAKGQ	1
P18858	DNA ligase 1;DNA ligase	LIG1	S	76	ARVLGSEGEEEDEALSPAKGQKPALDCSQVS	1
P18858	DNA ligase 1;DNA ligase	LIG1	S	201	KPLKTSKAETPTESVSEPEVATKQELQEEEE	0.999581
P18858	DNA ligase 1;DNA ligase	LIG1	S	51	KAALKEWNGVVSESDSPVKRPGRKAARVLGS	0.99792
P18858	DNA ligase 1;DNA ligase	LIG1	S	141	KQLPKRTIQEVLEEQSEDEDREAKRKKEEEE	1
P18858	DNA ligase 1;DNA ligase	LIG1	T	183	EVATEKEGEDGDQPTTPPKPLKTSKAETPTE	0.866638
P18858	DNA ligase 1;DNA ligase	LIG1	S	66	SPVKRPGRKAARVLGSEGEEEDEALSPAKGQ	1
P18858	DNA ligase 1;DNA ligase	LIG1	S	76	ARVLGSEGEEEDEALSPAKGQKPALDCSQVS	1
P49916	DNA ligase 3	LIG3	S	210	KAVVQAKLTTTGQVTSPVKGASFVTSTNPRK	0.943597
Q52LA3	Protein lin-52 homolog	LIN52	S	53	GVAEFAASFKSPITSSPPKWMAEIERDDIDM	0.955306
Q6MZP7	Protein lin-54 homolog	LIN54	S	310	STLNSTTQTPNKIAISPLKSPNKAVKSTVQT	1
Q6MZP7	Protein lin-54 homolog	LIN54	S	635	CSSICKCIGCKNFEESPERKTLMHLADAAEV	1
Q5TKA1	Protein lin-9 homolog	LIN9	T	96	QRVAMVPQKFTATMSTPDKKASQKIGFRLRN	0.800665
P02545	Prelamin-A/C;Lamin-A/C	LMNA	S	404	LSPSPTSQRSRGRASSHSSQTQGGGSVTKKR	0.982747
P02545	Prelamin-A/C;Lamin-A/C	LMNA	S	458	EEVDEEGKFVRLRNKSNEDQSMGNWQIKRQN	1
P02545	Prelamin-A/C;Lamin-A/C	LMNA	S	404	LSPSPTSQRSRGRASSHSSQTQGGGSVTKKR	0.982747
P02545	Prelamin-A/C;Lamin-A/C	LMNA	S	407	SPTSQRSRGRASSHSSQTQGGGSVTKKRKLE	0.99555
P20700	Lamin-B1	LMNB1	S	23	PPRMGSRAGGPTTPLSPTRLSRLQEKEELRE	0.833621
P20700	Lamin-B1	LMNB1	T	202	ETLLKVDLENRCQSLTEDLEFRKSMYEEEIN	0.895295
Q9C0E8	Protein lunapark	LNP	S	384	KIPATEQTNQVIEKASDSEEPEEKQETENEE	0.957251
Q969J3	Loss of heterozygosity 12 chromosomal region 1 protein	LOH12CR1	S	75	PTFQPLLKGLLSGQTSPTNAKLEKLDSQQVL	0.877755
Q7L5N7	Lysophosphatidylcholine acyltransferase 2	LPCAT2	S	530	PKEVQTTPSTASNKVSPEKHEESTSDKKDD_	0.983453
Q14693	Phosphatidate phosphatase LPIN1	LPIN1	S	254	TPSPSGSRPSTPKSDSELVSKSTERTGQKNP	0.908788
Q14693	Phosphatidate phosphatase LPIN1	LPIN1	S	162	SSSSVVKKRRKRRRKSQLDSLKRDDNMNTSE	1
P50851-2	Lipopolysaccharide-responsive and beige-like anchor protein	LRBA	S	10	______MASEDNRVPSPPPTGDDGGGGGREE	0.987468
Q8N1G4	Leucine-rich repeat-containing protein 47	LRRC47	S	518	MAEMKKYTLENKEEGSLSDTEADAVSGQLPD	0.999748
Q32MZ4-3	Leucine-rich repeat flightless-interacting protein 1	LRRFIP1	S	657	EGVAKDNAKIDGATQSSPAEPKSEDADRCTL	0.925488
Q32MZ4-3	Leucine-rich repeat flightless-interacting protein 1	LRRFIP1	S	658	GVAKDNAKIDGATQSSPAEPKSEDADRCTLP	0.936789
Q32MZ4-3	Leucine-rich repeat flightless-interacting protein 1	LRRFIP1	S	499	TQNEPLDMKEPDEEKSDQQGEALDSSQKKTK	1
Q32MZ4-3	Leucine-rich repeat flightless-interacting protein 1	LRRFIP1	S	525	QKKTKNKKKKNKKKKSPVPVETLKDVKKELT	0.999999
Q9UFC0	Leucine-rich repeat and WD repeat-containing protein 1	LRWD1	S	243	RLAALKRPDDVPLSLSPSKRACASPSAQVEG	0.987144
P33241	Lymphocyte-specific protein 1	LSP1	S	130	EQEDRPGLHAYEKEDSDEVHLEELSLSKEGP	1
P33241	Lymphocyte-specific protein 1	LSP1	S	141	EKEDSDEVHLEELSLSKEGPGPEDTVQDNLG	0.999057
P33241	Lymphocyte-specific protein 1	LSP1	S	252	AIETAGRTPKLARQASIELPSMAVASTKSRW	1
P33241	Lymphocyte-specific protein 1	LSP1	S	204	SPPLSPTTKLIDRTESLNRSIEKSNSVKKSQ	0.99279
P33241	Lymphocyte-specific protein 1	LSP1	S	208	SPTTKLIDRTESLNRSIEKSNSVKKSQPDLP	0.982951
P33241	Lymphocyte-specific protein 1	LSP1	S	218	ESLNRSIEKSNSVKKSQPDLPISKIDQWLEQ	1
O95232	Luc7-like protein 3	LUC7L3	T	238	IKATVEELKEKLRKRTEEPDRDERLKKEKQE	1
P12980	Protein lyl-1	LYL1	S	276	PGGAARPIKMEQTALSPEVR___________	0.999999
P12980	Protein lyl-1	LYL1	S	157	EGHQPQKVARRVFTNSRERWRQQNVNGAFAE	0.999971
P07948	Tyrosine-protein kinase Lyn	LYN	S	11	_____MGCIKSKGKDSLSDDGVDLKTQPVPE;_____MGCIKSKGKDSLSDDGVDLKTQPVRN	1
P07948	Tyrosine-protein kinase Lyn	LYN	S	13	___MGCIKSKGKDSLSDDGVDLKTQPVPESQ;___MGCIKSKGKDSLSDDGVDLKTQPVRNTE	1
P07948	Tyrosine-protein kinase Lyn	LYN	S	11	_____MGCIKSKGKDSLSDDGVDLKTQPVPE;_____MGCIKSKGKDSLSDDGVDLKTQPVRN	1
P07948	Tyrosine-protein kinase Lyn	LYN	S	13	___MGCIKSKGKDSLSDDGVDLKTQPVPESQ;___MGCIKSKGKDSLSDDGVDLKTQPVRNTE	1
Q99698	Lysosomal-trafficking regulator	LYST	S	2149	NIADTYVATQSKKQNSLGSSDTLKKGKEDAF	0.999999
Q9BRK4	Leucine zipper putative tumor suppressor 2	LZTS2	S	570	SDEAKVQRAAAGVGGSLRAQVERLRVELQRE	1
H3BPE1	Microtubule-actin cross-linking factor 1, isoforms 1/2/3/5	MACF1	S	4516	QAESNKAFLAELEQNSPKIQKVKEALAGLLV	1
H3BPE1	Microtubule-actin cross-linking factor 1, isoforms 1/2/3/5	MACF1	S	3326	SAVKTEKTPQEKLRESPGSEQTPFMTAPEGK	0.951461
H3BPE1	Microtubule-actin cross-linking factor 1, isoforms 1/2/3/5	MACF1	T	2015	TSPPKVVEIGHQRQKTPEGLQESANVKISGT	1
Q8WXG6-6	MAP kinase-activating death domain protein	MADD	S	996	AQTHYYSKEPDKRKRSPTESVNTPVGKDPGL	0.959841
Q9H063	Repressor of RNA polymerase III transcription MAF1 homolog	MAF1	S	75	SPPQTSGLSPSRLSKSQGGEEEGPLSDKCSR	1
Q9UNF1	Melanoma-associated antigen D2	MAGED2	S	2	______________MSDTSESGAGLTRFQAE	0.986285
P61326	Protein mago nashi homolog;Protein mago nashi homolog 2	MAGOH;MAGOHB	S	106	VIGDEHISFTTSKIGSLIDVNQSKDPEGLRV	1
Q66K74	Microtubule-associated protein 1S;MAP1S heavy chain;MAP1S light chain	MAP1S	S	475	TPQDLEGPGRAESKESVGSRDSSKREGLLAT	0.994967
P36507	Dual specificity mitogen-activated protein kinase kinase 2	MAP2K2	T	394	FAGWLCKTLRLNQPGTPTRTAV_________	0.996754
Q13163	Dual specificity mitogen-activated protein kinase kinase 5	MAP2K5	S	149	PAVSDSLPSNSLKKSSAELKKILANGQMNEQ	0.99694
Q13233	Mitogen-activated protein kinase kinase kinase 1	MAP3K1	S	21	GNRASSSGFPGARATSPEAGGGGGALKASSA	0.824422
Q13233	Mitogen-activated protein kinase kinase kinase 1	MAP3K1	S	1018	KHRLQGFIPCRIPSASPQTQRKFSLQFHRNC	0.948937
Q16584	Mitogen-activated protein kinase kinase kinase 11	MAP3K11	S	740	AKSPRREEEPRGGTVSPPPGTSRSAPGTPGT	0.994188
Q16584	Mitogen-activated protein kinase kinase kinase 11	MAP3K11	S	507	ISMPLDFKHRITVQASPGLDRRRNVFEVGPG	1
E7EVA0	Microtubule-associated protein;Microtubule-associated protein 4	MAP4	S	297	ALATKTEVALAKDMESPTKLDVTLAKDMQPS	0.998242
E7EVA0	Microtubule-associated protein;Microtubule-associated protein 4	MAP4	S	524	VAPSTVKEVGLLKDMSPLSETEMALGKDVTP	1
E7EVA0	Microtubule-associated protein;Microtubule-associated protein 4	MAP4	S	1841	TGNDITTPPNKELPPSPEKKTKPIADAKAPE;TGNDITTPPNKELPPSPEKKTKPLATTQPAK	1
E7EVA0	Microtubule-associated protein;Microtubule-associated protein 4	MAP4	S	375	APAKDVTLLKETERASPIKMDLAPSKDMGPP	0.999945
E7EVA0	Microtubule-associated protein;Microtubule-associated protein 4	MAP4	S	1679	KGSDSLNKKVDLTLLSPKSENDKLKEISLAC	0.999997
E7EVA0	Microtubule-associated protein;Microtubule-associated protein 4	MAP4	S	2218	SQKLNFKEKAQAKVGSLDNVGHLPAGGAVKI;SQKLNFKEKAQAKVGSLDNVGHLPAGGAVKT	1
E7EVA0	Microtubule-associated protein;Microtubule-associated protein 4	MAP4	S	2086	NTSAPDLKNVRSKVGSTENIKHQPGGGRAKV;NTSAPDLKNVRSKVGSTENIKHQPGGGRVQI	0.998994
E7EVA0	Microtubule-associated protein;Microtubule-associated protein 4	MAP4	T	588	APLAKDGVLTLANNVTPAKDVPPLSETEATP	0.999999
E7EVA0	Microtubule-associated protein;Microtubule-associated protein 4	MAP4	T	538	MSPLSETEMALGKDVTPPPETEVVLIKNVCL	1
Q3KQU3	MAP7 domain-containing protein 1	MAP7D1	S	753	ANGSSPEPVKAVEARSPGLQKEAVQKEEPIP	1
Q3KQU3	MAP7 domain-containing protein 1	MAP7D1	S	742	TKQKQDSKEANANGSSPEPVKAVEARSPGLQ	0.999493
Q3KQU3	MAP7 domain-containing protein 1	MAP7D1	S	70	MKNATSSKQLPLEPESPSGQVGPRPAPPQEE	0.789495
Q8IWC1	MAP7 domain-containing protein 3	MAP7D3	S	441	PKESVKGSPKESMEASPEAMVKASPKTSLEA	0.999994
Q16539	Mitogen-activated protein kinase 14	MAPK14	S	2	______________MSQERPTFYRQELNKTI	0.986805
Q16539	Mitogen-activated protein kinase 14	MAPK14	Y	182	LDFGLARHTDDEMTGYVATRWYRAPEIMLNW	0.757311
Q8NDC0	MAPK-interacting and spindle-stabilizing protein-like	MAPK1IP1L	S	15	_MSDEFSLADALPEHSPAKTSAVSNTKPGQP	1
P45983-3	Mitogen-activated protein kinase 8	MAPK8	S	377	DLEERTKNGVIRGQPSPLAQVQQ________	1
P29966	Myristoylated alanine-rich C-kinase substrate	MARCKS	S	145	ASSTSSPKAEDGATPSPSNETPKKKKKRFSF	0.962026
P29966	Myristoylated alanine-rich C-kinase substrate	MARCKS	S	118	VEKEAPAEGEAAEPGSPTAAEGEAASAASST	0.961634
P29966	Myristoylated alanine-rich C-kinase substrate	MARCKS	S	81	AADKEEPAAAGSGAASPSAAEKGEPAAAAAP	0.858155
P29966	Myristoylated alanine-rich C-kinase substrate	MARCKS	S	27	GEAAAERPGEAAVASSPSKANGQENGHVKVN	0.999466
P29966	Myristoylated alanine-rich C-kinase substrate	MARCKS	S	101	EKGEPAAAAAPEAGASPVEKEAPAEGEAAEP	1
P29966	Myristoylated alanine-rich C-kinase substrate	MARCKS	S	170	KKRFSFKKSFKLSGFSFKKNKKEAGEGGEAE	1
P29966	Myristoylated alanine-rich C-kinase substrate	MARCKS	S	46	ANGQENGHVKVNGDASPAAAESGAKEELQAN	0.999998
P29966	Myristoylated alanine-rich C-kinase substrate	MARCKS	T	150	SPKAEDGATPSPSNETPKKKKKRFSFKKSFK	0.992817
P49006	MARCKS-related protein	MARCKSL1	S	22	KAPRGDVTAEEAAGASPAKANGQENGHVKSN	1
P49006	MARCKS-related protein	MARCKSL1	S	104	KKKFSFKKPFKLSGLSFKRNRKEGGGDSSAS	1
P49006	MARCKS-related protein	MARCKSL1	S	36	ASPAKANGQENGHVKSNGDLSPKGEGESPPV	1
P49006	MARCKS-related protein	MARCKSL1	T	148	ACSDEGTAQEGKAAATPESQEPQAKGAEASA	1
P49006	MARCKS-related protein	MARCKSL1	T	85	PSQGAEAKGEVPPKETPKKKKKFSFKKPFKL	1
Q7KZI7-14	Serine/threonine-protein kinase MARK2	MARK2	S	422	RESGRKASSTAKVPASPLPGLERKKTTPTPS	1
P27448	MAP/microtubule affinity-regulating kinase 3	MARK3	S	469	KSSGSAVGGKGIAPASPMLGNASNPNKADIP	1
Q6P0Q8	Microtubule-associated serine/threonine-protein kinase 2;Microtubule-associated serine/threonine-protein kinase 1	MAST2;MAST1	S	1407	KSAEPPRSPLLKRVQSAEKLAAALAASEKKL	1
O60307	Microtubule-associated serine/threonine-protein kinase 3	MAST3	S	793	LNTISLDTMPKFAFSSEDEGVGPGPAGPKRP	0.851688
P31153	S-adenosylmethionine synthase isoform type-2	MAT2A	S	38	ESVGEGHPDKICDQISDAVLDAHLQQDPDAK	1
A8MXP9	Matrin-3	MATR3	S	596	NRGIDLLKKDKSRKRSYSPDGKESPSDKKSK	0.982095
A8MXP9	Matrin-3	MATR3	S	598	GIDLLKKDKSRKRSYSPDGKESPSDKKSKTD	0.998444
A8MXP9	Matrin-3	MATR3	S	596	NRGIDLLKKDKSRKRSYSPDGKESPSDKKSK	0.982095
A8MXP9	Matrin-3	MATR3	S	598	GIDLLKKDKSRKRSYSPDGKESPSDKKSKTD	0.998444
A8MXP9	Matrin-3	MATR3	S	604	KDKSRKRSYSPDGKESPSDKKSKTDGSQKTE	0.98271
A8MXP9	Matrin-3	MATR3	S	596	NRGIDLLKKDKSRKRSYSPDGKESPSDKKSK	0.982095
A8MXP9	Matrin-3	MATR3	S	598	GIDLLKKDKSRKRSYSPDGKESPSDKKSKTD	0.998444
A8MXP9	Matrin-3	MATR3	S	604	KDKSRKRSYSPDGKESPSDKKSKTDGSQKTE	0.98271
P61244-2	Protein max	MAX	S	2	______________MSDNDDIEVESDADKRA	1
P02686	Myelin basic protein	MBP	S	19	HAGKRELNAEKASTNSETNRGESEKKRNLGE	0.987121
Q8IX19	Mast cell-expressed membrane protein 1	MCEMP1	Y	38	KQGVSAKNQGAHDPDYENITLAFKNQDHAKG	0.999967
P49736	DNA replication licensing factor MCM2	MCM2	S	13	___MAESSESFTMASSPAQRRRGNDPLTSSP	0.959165
P49736	DNA replication licensing factor MCM2	MCM2	S	139	AGRGLGRMRRGLLYDSDEEDEERPARKRRQV	0.99998
P49736	DNA replication licensing factor MCM2	MCM2	S	27	SSPAQRRRGNDPLTSSPGRSSRRTDALTSSP	0.988307
P49736	DNA replication licensing factor MCM2	MCM2	S	40	TSSPGRSSRRTDALTSSPGRDLPPFEDESEG	0.826578
P49736	DNA replication licensing factor MCM2	MCM2	S	41	SSPGRSSRRTDALTSSPGRDLPPFEDESEGL	0.999656
P49736	DNA replication licensing factor MCM2	MCM2	S	26	ASSPAQRRRGNDPLTSSPGRSSRRTDALTSS	0.947538
P49736	DNA replication licensing factor MCM2	MCM2	S	27	SSPAQRRRGNDPLTSSPGRSSRRTDALTSSP	0.988307
P25205	DNA replication licensing factor MCM3	MCM3	S	672	VLEKEKKRKKRSEDESETEDEEEKSQEDQEQ	1
P33991	DNA replication licensing factor MCM4	MCM4	S	3	_____________MSSPASTPSRRGSRRGRA	0.855317
Q14566	DNA replication licensing factor MCM6	MCM6	S	762	ELVNWYLKEIESEIDSEEELINKKRIIEKVI	1
Q14566	DNA replication licensing factor MCM6	MCM6	S	13	___MDLAAAAEPGAGSQHLEVRDEVAEKCQK	1
Q8IZK6-2	Mucolipin-2	MCOLN2	S	530	SSAFLSCICCRRRKRSDDHLIPIS_______	1
Q14676	Mediator of DNA damage checkpoint protein 1	MDC1	S	495	LVRAHSEKDQPPFGDSDDSVEADKSSPGIHL	0.988202
Q14676	Mediator of DNA damage checkpoint protein 1	MDC1	S	882	RDTQRQESDKNGESASPERDRESLKVEIETS	0.972752
Q14676	Mediator of DNA damage checkpoint protein 1	MDC1	S	1820	PKASQSRKRSLATMDSPPHQKQPQRGEVSQK	0.998257
Q14676	Mediator of DNA damage checkpoint protein 1	MDC1	T	1608	TSRATRCRTNRSSVKTPEPVVPTAPEPHPTT	1
Q14676	Mediator of DNA damage checkpoint protein 1	MDC1	S	402	QAVPLEKSQASMVINSDTDDEEEVSAALTLA	0.950256
Q14676	Mediator of DNA damage checkpoint protein 1	MDC1	T	404	VPLEKSQASMVINSDTDDEEEVSAALTLAHL	0.950256
P40925	Malate dehydrogenase, cytoplasmic;Malate dehydrogenase	MDH1	T	135	AKKSVKVIVVGNPANTNCLTASKSAPSIPKE	0.992937
O15151	Protein Mdm4	MDM4	S	342	RKDWYSDCSKLTHSLSTSDITAIPEKENEGN	0.992293
Q9NU22	Midasin	MDN1	T	4898	DDLNLDSEDKNGGEDTDNEEGEEENPLEIKE	1
Q86V88	Magnesium-dependent phosphatase 1	MDP1	S	168	GLETFAKAQTGPLRSSLEESPFEA_______	0.830322
P51608-2	Methyl-CpG-binding protein 2	MECP2	S	92	SEGSGSAPAVPEASASPKQRRSIIRDRGPMY	0.963127
P51608-2	Methyl-CpG-binding protein 2	MECP2	S	241	EKSPGKLLVKMPFQTSPGGKAEGGGATTSTQ	0.922238
Q15648	Mediator of RNA polymerase II transcription subunit 1	MED1	S	1042	SNRPFTPPTSTGGSKSPGSAGRSQTPPGVAT	0.999986
Q15648	Mediator of RNA polymerase II transcription subunit 1	MED1	S	1042	SNRPFTPPTSTGGSKSPGSAGRSQTPPGVAT	0.999986
Q15648	Mediator of RNA polymerase II transcription subunit 1	MED1	S	1479	ESESGSSIAEKSYQNSPSSDDGIRPLPEYST	0.999993
Q15648	Mediator of RNA polymerase II transcription subunit 1	MED1	S	1482	SGSSIAEKSYQNSPSSDDGIRPLPEYSTEKH	0.906018
Q15648	Mediator of RNA polymerase II transcription subunit 1	MED1	T	1051	STGGSKSPGSAGRSQTPPGVATPPIPKITIQ	0.901063
Q93074	Mediator of RNA polymerase II transcription subunit 12	MED12;TNRC11	S	698	DFSLFSPTMPCEGKGSPSPEKPDVEKEVKPP	1
Q93074	Mediator of RNA polymerase II transcription subunit 12	MED12;TNRC11	S	698	DFSLFSPTMPCEGKGSPSPEKPDVEKEVKPP	1
Q93074	Mediator of RNA polymerase II transcription subunit 12	MED12;TNRC11	S	700	SLFSPTMPCEGKGSPSPEKPDVEKEVKPPPK	1
Q71F56	Mediator of RNA polymerase II transcription subunit 13-like	MED13L	S	923	TQLTEFKMEVEDGLGSPKPEEIKDFSYVHKV	1
Q96RN5	Mediator of RNA polymerase II transcription subunit 15	MED15	T	603	CEIALEKLKNDMAVPTPPPPPVPPTKQQYLC	0.999957
O75448	Mediator of RNA polymerase II transcription subunit 24	MED24	S	873	MRLLSSNEDDANILSSPTDRSMSSSLSASQL	0.781266
Q06413	Myocyte-specific enhancer factor 2C	MEF2C	S	222	GAGTSAGNGYGNPRNSPGLLVSPGNLNKNMQ	0.999999
Q14814-4	Myocyte-specific enhancer factor 2D	MEF2D	S	180	TPSLVTSSLTDPRLLSPQQPALQRNSVSPGL	1
Q14814-4	Myocyte-specific enhancer factor 2D	MEF2D	S	251	PVANGNSLNKVIPAKSPPPPTHSTQLGAPSR	0.993959
O15553	Pyrin	MEFV	S	242	RPFEVYLPSGKMRPRSLEVTISTGEKAPANP	0.999803
O15553	Pyrin	MEFV	S	179	KASEGLDAQGKPRTRSPALPGGRSPGPCRAL	1
Q14680	Maternal embryonic leucine zipper kinase	MELK	S	529	HMEETPKRKGAKVFGSLERGLDKVITVLTRS	1
Q8TCB7	Methyltransferase-like protein 6	METTL6	S	274	RVFLQSKFLKPPKNPSPVVLGLDPKS_____	1
P55081	Microfibrillar-associated protein 1	MFAP1	T	267	LEENKRSLAALDALNTDDENDEEEYEAWKVR	0.999954
Q6ZSS7	Major facilitator superfamily domain-containing protein 6	MFSD6	T	10	______MADDKVAILTDDEEEQKRKYVLADP	1
Q8IWI9	MAX gene-associated protein	MGA	S	2088	VKVEQQKGFDNPEENSSEFPVTFKEESKFEL	0.836971
Q8IWI9	MAX gene-associated protein	MGA	S	3020	PTLAPVVAKLGNSGASPSSAGK_________	0.909699
Q8IWI9	MAX gene-associated protein	MGA	S	1422	DMAEKSGSETPDGPLSPGKMEDISPVQTDAL	0.999999
Q8IWI9	MAX gene-associated protein	MGA	S	924	GRTKSSYKSILPYPVSPKQKYSHVILGDKVT	0.999999
Q8IWI9	MAX gene-associated protein	MGA	S	607	KIATAAKVVNANQNASPNVPGKRGRPRKLKL	1
Q8IWI9	MAX gene-associated protein	MGA	S	449	DNPEADHLSSKWLPSSPSGVAKAKMFKLDTG	0.942139
Q8IWI9	MAX gene-associated protein	MGA	S	1422	DMAEKSGSETPDGPLSPGKMEDISPVQTDAL	0.999999
Q8IWI9	MAX gene-associated protein	MGA	T	1416	SCQDQDDMAEKSGSETPDGPLSPGKMEDISP	0.777284
Q9BQP7	Mitochondrial genome maintenance exonuclease 1	MGME1	S	343	YTEKKKNQNIQKPEYSE______________	0.999995
P16455	Methylated-DNA--protein-cysteine methyltransferase	MGMT	S	201	GLAGAWLKGAGATSGSPPAGRN_________	0.999374
Q5JRA6	Melanoma inhibitory activity protein 3	MIA3	S	876	HLKTSGLAGEPEGELSKEDHENTEKYMGTES	1
Q8N3F8	MICAL-like protein 1	MICALL1	S	295	IPTKPRVPGKLQELASPPAGRPTPAPRKASE	0.926181
Q9NQG6	Mitochondrial dynamics protein MID51	MIEF1	S	55	GIATLAVKRMYDRAISAPTSPTRLSHSGKRS	0.99971
Q6P0N0	Mis18-binding protein 1	MIS18BP1	S	1116	GENSGIGKLFTNAVESLDEEEKDYYFSNSDS	1
Q6P0N0	Mis18-binding protein 1	MIS18BP1	T	653	RKYMAINQKKAYILVTPLKSRKVIEQRCMRY	1
P46013	Antigen KI-67	MKI67	S	1679	TEPTGDGKSMKAFMESPKQILDSAASLTGSK	1
P46013	Antigen KI-67	MKI67	S	584	VEVKAQSLVISPPAPSPRKTPVASDQRRRSC	0.999913
P46013	Antigen KI-67	MKI67	S	1937	GTPVEKLDLLGNLPGSKRRPQTPKEKAKALE	1
P46013	Antigen KI-67	MKI67	S	2588	EESMTIDKNTKIPCKSPPPELTDTATSTKRC	0.999996
P46013	Antigen KI-67	MKI67	S	2344	DKPTTDEKTTKIACKSPQPDPVDTPASTKQR	1
P46013	Antigen KI-67	MKI67	S	2466	EESMTDDKITEVSCKSPQPESFKTSRSSKQR	1
P46013	Antigen KI-67	MKI67	S	1861	NPTTDEKTTKKILCKSPQSDPADTPTNTKQR	0.999748
P46013	Antigen KI-67	MKI67	S	2828	ESMTDDKTTKIPCKSSPELEDTATSSKRRPR	0.875114
P46013	Antigen KI-67	MKI67	T	1801	KPAVGEEKDINTFLGTPVQKLDQPGNLPGSN	0.999998
Q15773	Myeloid leukemia factor 2	MLF2	S	238	RAEGPPRLAIQGPEDSPSRQSRRYDW_____	0.790881
Q15773	Myeloid leukemia factor 2	MLF2	S	216	SRFRQQRPLEFRRLESSGAGGRRAEGPPRLA	0.95071
Q5TCX8	Mitogen-activated protein kinase kinase kinase MLK4	MLK4	S	528	ISLPSDFQHKITVQASPNLDKRRSLNSSSSS	1
Q03111	Protein ENL	MLLT1	S	361	EPREAKKALEVEESNSEDEASFKSESAQSSP	0.999919
Q03111	Protein ENL	MLLT1	S	267	KEPKMALKETKLESTSPKGGPPPPPPPPPRA	0.975979
Q03111	Protein ENL	MLLT1	S	292	PPPPRASSKRPATADSPKPSAKKQKKSSSKG	0.999391
Q03111	Protein ENL	MLLT1	S	359	ESEPREAKKALEVEESNSEDEASFKSESAQS	0.999991
Q03111	Protein ENL	MLLT1	S	361	EPREAKKALEVEESNSEDEASFKSESAQSSP	0.999919
P55196	Afadin	MLLT4	S	1774	GAHDACRDAKEKRSKSQDADSPGSSGAPENL	0.999511
P55198	Protein AF-17	MLLT6	S	258	KDKERLKQKHKKRPESPPSILTPPVVPTADK	0.943848
Q9UH92	Max-like protein X	MLX	S	7	_________MTEPGASPEDPWVKASPVGAHA	0.999904
Q6ZRQ5	Protein MMS22-like	MMS22L	S	378	KFDRHGVPDEMRKVESNWNFVEELLKKSISV	1
O96007	Molybdopterin synthase catalytic subunit	MOCS2	S	20	EISSSCFSLETKLPLSPPLVEDSAFEPSRKD	1
Q9Y6X9	MORC family CW-type zinc finger protein 2	MORC2	S	777	GRFVVKEEKKDSNELSDSAGEEDSADLKRAQ	1
Q9Y6X9	MORC family CW-type zinc finger protein 2	MORC2	S	725	PSPKVIKTPVVKKTESPIKLSPATPSRKRSV	0.999921
Q9Y6X9	MORC family CW-type zinc finger protein 2	MORC2	S	615	RPSTEEPVRRPQRPRSPPLPAVIRNAPSRPP	1
Q9Y6X9	MORC family CW-type zinc finger protein 2	MORC2	S	777	GRFVVKEEKKDSNELSDSAGEEDSADLKRAQ	1
Q9Y6X9	MORC family CW-type zinc finger protein 2	MORC2	S	779	FVVKEEKKDSNELSDSAGEEDSADLKRAQKD	1
Q5JXX2		MORF4L2	S	168	KNVDAILEEYANCKKSQGNVDNKEY______	0.999984
Q99549	M-phase phosphoprotein 8	MPHOSPH8	S	51	EDNDAAARGAEAFGDSEEDGEDVFEVEKILD	1
Q6WCQ1-2	Myosin phosphatase Rho-interacting protein	MPRIP	S	993	PDSATVSGYDIMKSKSNPDFLKKDRSCVTRQ	1
Q6WCQ1-2	Myosin phosphatase Rho-interacting protein	MPRIP	S	224	RTKDQPDGSSLSPAQSPSQSQPPAASSLREP	0.853956
Q9NV56	MRG/MORF4L-binding protein	MRGBP	S	195	SRVTDKVLTANSNPSSPSAAKRRRT______	0.836399
Q9Y3D3	28S ribosomal protein S16, mitochondrial	MRPS16	T	130	AREVLLASQKTDAEATDTEATET________	0.998957
Q9Y2R5	28S ribosomal protein S17, mitochondrial	MRPS17;hCG_1984214	S	128	ETTQLSKNLEELNISSAQ_____________	0.818868
P52701	DNA mismatch repair protein Msh6	MSH6	S	227	TTYVTDKSEEDNEIESEEEVQPKTQGSRRSS	1
P52701	DNA mismatch repair protein Msh6	MSH6	S	14	__MSRQSTLYSFFPKSPALSDANKASARASR	1
P52701	DNA mismatch repair protein Msh6	MSH6	S	219	EEEEMEVGTTYVTDKSEEDNEIESEEEVQPK	1
P52701	DNA mismatch repair protein Msh6	MSH6	S	227	TTYVTDKSEEDNEIESEEEVQPKTQGSRRSS	1
P26038	Moesin	MSN	S	407	ERQEAEEAKEALLQASRDQKKTQEQLALEMA	1
P26038	Moesin	MSN	S	576	QIRQGNTKQRIDEFESM______________	1
Q13330	Metastasis-associated protein MTA1	MTA1	S	576	SSLTPAKVAPVINNGSPTILGKRSYEQHNGV	0.969152
Q96DY7	Mdm2-binding protein	MTBP	S	639	PIQKGEKTFVLTPELSPGKLQVLPFEKASVC	0.999854
Q86UE4	Protein LYRIC	MTDH	S	298	GGGWNEKSVKLSSQISAGEEKWNSVSPASAG	0.999992
Q86UE4	Protein LYRIC	MTDH	S	568	NSVPPSQTKSETSWESPKQIKKKKKARRET_	1
Q86UE4	Protein LYRIC	MTDH	S	426	SLLKSQEPIPDDQKVSDDDKEKGEGALPTGK	1
Q86UE4	Protein LYRIC	MTDH	S	308	LSSQISAGEEKWNSVSPASAGKRKTEPSAWS	0.982555
Q15390	Mitochondrial fission regulator 1	MTFR1	S	119	QDDLLFFEKAPSRQISLPDLSQEEPQLKTPA	0.840203
Q9H019	Mitochondrial fission regulator 1-like	MTFR1L	S	238	SSSEEDDCVSLSKASSFADMMGILKDFHRMK	0.999399
Q9H019	Mitochondrial fission regulator 1-like	MTFR1L	S	103	HTWKPSPLIVMQRNASVPNLRGSEERLLALK	1
Q9NXD2	Myotubularin-related protein 10	MTMR10	S	769	GTPLSKFLSGAKIWLSTETLANED_______	0.857578
P42345	Serine/threonine-protein kinase mTOR	MTOR	S	1261	ASGPVETGPMKKLHVSTINLQKAWGAARRVS	0.846845
Q5HYI7	Metaxin-3	MTX3	S	311	KLTPAEEENNSFQRLSP______________	1
Q9BQG0	Myb-binding protein 1A	MYBBP1A	S	775	LMTVLQAGKALGGEDSENEEELGDEAMMALD	1
Q9BQG0	Myb-binding protein 1A	MYBBP1A	S	1163	KLEKKDAKEIPSATQSPISKKRKKKGFLPET	0.997395
Q9BQG0	Myb-binding protein 1A	MYBBP1A	T	1227	KRNRTKAKVPAQANGTPTTKSPAPGAPTRSP	0.98949
Q9BQG0	Myb-binding protein 1A	MYBBP1A	S	1159	VQRPKLEKKDAKEIPSATQSPISKKRKKKGF	0.912014
Q9BQG0	Myb-binding protein 1A	MYBBP1A	S	1163	KLEKKDAKEIPSATQSPISKKRKKKGFLPET	0.997395
P10244	Myb-related protein B	MYBL2	S	241	TNWPSVPPTIKEEENSEEELAAATTSKEQEP	1
P10244	Myb-related protein B	MYBL2	T	266	SKEQEPIGTDLDAVRTPEPLEEFPKREDQEG	0.997724
O75592	E3 ubiquitin-protein ligase MYCBP2	MYCBP2	S	3893	GDAEPTPEQEEKALLSSPEGEEKVYNATSDA	1
O75592	E3 ubiquitin-protein ligase MYCBP2	MYCBP2	S	3894	DAEPTPEQEEKALLSSPEGEEKVYNATSDAD	1
O75592	E3 ubiquitin-protein ligase MYCBP2	MYCBP2	S	2947	SIGKAPLKDEQEMRASPKISRKCANRHTRPK	1
O75592	E3 ubiquitin-protein ligase MYCBP2	MYCBP2	S	2833	APVKTKLDPPRERSKSDSYTLDPDTLRKKKM	0.951838
O75592	E3 ubiquitin-protein ligase MYCBP2	MYCBP2	S	3467	ILPARVKAIPRRRVNSGDTEVGSSLLRHPSP	1
O75592	E3 ubiquitin-protein ligase MYCBP2	MYCBP2	S	3893	GDAEPTPEQEEKALLSSPEGEEKVYNATSDA	1
O75592	E3 ubiquitin-protein ligase MYCBP2	MYCBP2	S	3894	DAEPTPEQEEKALLSSPEGEEKVYNATSDAD	1
P35579	Myosin-9	MYH9	S	1943	FVVPRRMARKGAGDGSDEEVDGKADGAEAKP	1
P19105	Myosin regulatory light chain 12A;Myosin regulatory light chain 12B;Myosin regulatory light polypeptide 9	MYL12A;MYL12B;MYL9	S	19	KRTKTKTKKRPQRATSNVFAMFDQSQIQEFK	0.865832
B0I1T2	Unconventional myosin-Ig;Minor histocompatibility antigen HA-2	MYO1G	S	583	EVTKRPLTAGTLFKNSMVALVENLASKEPFY	0.999997
Q13459	Unconventional myosin-IXb	MYO9B	S	1405	KKKPGDASSLPDAGLSPGSQVDSKSTFKRLF	0.991212
Q5VVJ2	Histone H2A deubiquitinase MYSM1	MYSM1	S	218	GRADPNLNAVKIEKLSDDEEVDITDEVDELS	0.999671
O75113	NEDD4-binding protein 1	N4BP1	S	300	RRFSDSEERHTKKQFSLENVQEGEILHDAKT	1
O75113	NEDD4-binding protein 1	N4BP1	T	242	RDETVLQEEARNKAGTPVSELTKQMDTVLSS	0.999979
Q86UW6	NEDD4-binding protein 2	N4BP2	S	1325	EIKRNENFPKDYVKFSDEEEFMNEDEKEMKE	1
P41227	N-alpha-acetyltransferase 10	NAA10	S	216	AAEDSGGDSKDLSEVSETTESTDVKDSSEAS	0.846716
P41227	N-alpha-acetyltransferase 10	NAA10	S	205	SGEACREEKGLAAEDSGGDSKDLSEVSETTE	0.987885
Q9BXJ9	N-alpha-acetyltransferase 15, NatA auxiliary subunit	NAA15	S	856	PGYEEDMKITVNGDSSAEAEELANEI_____	0.79853
Q15742	NGFI-A-binding protein 2	NAB2	S	159	GHGSPGEKAGSARSFSPKSPLELGEKLSPLP	0.940893
Q15742	NGFI-A-binding protein 2	NAB2	S	6	__________MHRAPSPTAEQPPGGGDSARR	0.996913
Q15742	NGFI-A-binding protein 2	NAB2	S	162	SPGEKAGSARSFSPKSPLELGEKLSPLPGGP	1
E9PAV3	Nascent polypeptide-associated complex subunit alpha, muscle-specific form;Nascent polypeptide-associated complex subunit alpha	NACA	S	2029	SNIQENTQTPTVQEESEEEEVDETGVEVKDI	0.999992
Q96HR8	H/ACA ribonucleoprotein complex non-core subunit NAF1	NAF1	S	315	SWKNDQEPPPEALDFSDDEKEKEAKQRKKSQ	1
Q99733	Nucleosome assembly protein 1-like 4	NAP1L4	S	5	___________MADHSFSDGVPSDSVEAAKN	0.999946
Q99733	Nucleosome assembly protein 1-like 4	NAP1L4	S	7	_________MADHSFSDGVPSDSVEAAKNAS	0.999993
Q99733	Nucleosome assembly protein 1-like 4	NAP1L4	S	125	ITGDVEPTDAESEWHSENEEEEKLAGDMKSK	1
P49321	Nuclear autoantigenic sperm protein	NASP	S	726	DISHLVRKKRKPEEESPRKDDAKKAKQEPEV	1
Q93015-2	N-acetyltransferase 6	NAT6	S	7	_________MQELTLSPGPAKLTPTLDPTHR	0.98884
Q8IVL1-4	Neuron navigator 2	NAV2	T	845	RRLNRLPDGMAVVRETLQRNTSLGLGDADSW	1
Q8IVL0	Neuron navigator 3	NAV3	S	1039	KGKAPLKGSSLQRSPSDAGKSSGDEGKKPPS	0.831687
Q8IVL0	Neuron navigator 3	NAV3	S	1190	TSKLREPTKIGSGRSSPVTVNQTDKEKEKVA	0.894842
Q8IVL0	Neuron navigator 3	NAV3	S	940	RTDSEKRSTTDETWDSPEELKKPEEDFDSHG	0.983104
Q8IVL0	Neuron navigator 3	NAV3	S	1207	VTVNQTDKEKEKVAVSDSESVSLSGSPKSSP	0.999986
Q8IVL0	Neuron navigator 3	NAV3	S	1217	EKVAVSDSESVSLSGSPKSSPTSASACGAQG	0.982904
Q8IVL0	Neuron navigator 3	NAV3	S	1186	AGATTSKLREPTKIGSGRSSPVTVNQTDKEK	0.994567
Q8IVL0	Neuron navigator 3	NAV3	S	1189	TTSKLREPTKIGSGRSSPVTVNQTDKEKEKV	0.856331
Q8IVL0	Neuron navigator 3	NAV3	S	1190	TSKLREPTKIGSGRSSPVTVNQTDKEKEKVA	0.894842
Q8IVL0	Neuron navigator 3	NAV3	S	1207	VTVNQTDKEKEKVAVSDSESVSLSGSPKSSP	0.999986
Q8IVL0	Neuron navigator 3	NAV3	S	1217	EKVAVSDSESVSLSGSPKSSPTSASACGAQG	0.982904
Q8IVL0	Neuron navigator 3	NAV3	S	1039	KGKAPLKGSSLQRSPSDAGKSSGDEGKKPPS	0.831687
Q8IVL0	Neuron navigator 3	NAV3	S	1044	LKGSSLQRSPSDAGKSSGDEGKKPPSGIGRS	0.999849
Q8IVL0	Neuron navigator 3	NAV3	S	1045	KGSSLQRSPSDAGKSSGDEGKKPPSGIGRST	0.999849
A2RRP1	Neuroblastoma-amplified sequence	NBAS	S	1937	IKTVKHFIEKPRKRNSEDEAQEAKDSKVTYA	1
O60934	Nibrin	NBN	S	432	VSNTLAKMRIPNYQLSPTKLPSINKSKDRAS	0.993421
P13591-1	Neural cell adhesion molecule 1	NCAM1	Y	285	SQLTIKKVDKNDEAEYICIAENKAGEQDATI	1
Q15021	Condensin complex subunit 1	NCAPD2	S	1333	KPSTGSRYQPLASTASDNDFVTPEPRRTTRR	0.980358
P19878	Neutrophil cytosol factor 2	NCF2	S	332	IPAPPSSKAPGRPQLSPGQKQKEEPKEVKLS	1
P55160	Nck-associated protein 1-like	NCKAP1L	S	671	PERDKPGAESHRKNRSIVTNMDKLHLNLTEL	1
P55160	Nck-associated protein 1-like	NCKAP1L	T	674	DKPGAESHRKNRSIVTNMDKLHLNLTELALT	1
Q9HCH0	Nck-associated protein 5-like	NCKAP5L	S	436	HSSSQVKSKLQIGPPSPGEAQGPLLPSPARG	0.999994
C9JWL1		NCL	S	168	EIEPAAMKAAAAAPASED_____________	1
P19338	Nucleolin	NCL	S	67	KGKKAAATSAKKVVVSPTKKVAVATPAKKAA	0.999988
P19338	Nucleolin	NCL	S	619	RETGSSKGFGFVDFNSEEDAKAAKEAMEDGE	1
P19338	Nucleolin	NCL	S	580	NARSQPSKTLFVKGLSEDTTEETLKESFDGS	1
P19338	Nucleolin	NCL	T	121	TPGKKGATPGKALVATPGKKGAAIPAKGAKN	1
P19338	Nucleolin	NCL	T	367	VDFESAEDLEKALELTGLKVFGNEIKLEKPK	1
Q15596	Nuclear receptor coactivator 2	NCOA2	S	565	SSLASPDLKMGNLQNSPVNMNPPPLSKMGSL	1
Q9Y6Q9	Nuclear receptor coactivator 3	NCOA3	S	728	ITSCGDGNVVKQEQLSPKKKENNALLRYLLD	1
Q9HCD5	Nuclear receptor coactivator 5	NCOA5	S	9	_______MNTAPSRPSPTRRDPYGFGDSRDS	0.963549
Q9HCD5	Nuclear receptor coactivator 5	NCOA5	S	29	DPYGFGDSRDSRRDRSPIRGSPRREPRDGRN	1
Q9HCD5	Nuclear receptor coactivator 5	NCOA5	S	34	GDSRDSRRDRSPIRGSPRREPRDGRNGRDAR	1
O75376	Nuclear receptor corepressor 1	NCOR1	S	224	LEEEAAKPPEPEKPVSPPPVEQKHRSIVQII	1
O75376	Nuclear receptor corepressor 1	NCOR1	S	1322	SFEDGLKYPKQIKRESPPIRAFEGAITKGKP	1
Q9Y618	Nuclear receptor corepressor 2	NCOR2	S	2214	GAPARGSPHSEGGKRSPEPNKTSVLGGGEDG	1
Q9Y618	Nuclear receptor corepressor 2	NCOR2	S	2269	YRDGEQTEPSRMGSKSPGNTSQPPAFFSKLT	0.999997
Q9Y618	Nuclear receptor corepressor 2	NCOR2	T	1391	EDYLRREAKLLKREGTPPPPPPSRDLTEAYK	0.999739
Q9Y618	Nuclear receptor corepressor 2	NCOR2	S	149	DLTKDRSLTGKLEPVSPPSPPHTDPELELVP	0.993205
Q9BTX1	Nucleoporin NDC1	NDC1	S	406	GRVSSSYPVEPKKLNSPEETAFQTPKSSQMP	1
Q92597	Protein NDRG1	NDRG1	S	330	MPSASMTRLMRSRTASGSSVTSLDGTRSRSH	0.999896
Q92597	Protein NDRG1	NDRG1	T	24	DLAEVKPLVEKGETITGLLQEFDVQEQDIET	0.856537
Q92597	Protein NDRG1	NDRG1	S	330	MPSASMTRLMRSRTASGSSVTSLDGTRSRSH	0.999896
Q92597	Protein NDRG1	NDRG1	S	333	ASMTRLMRSRTASGSSVTSLDGTRSRSHTSE	0.901313
P52848	Bifunctional heparan sulfate N-deacetylase/N-sulfotransferase 1;Heparan sulfate N-deacetylase 1;Heparan sulfate N-sulfotransferase 1	NDST1	S	176	AYGVGIIGFFKANENSLLSAQLKGFPLFLHS	1
P52848	Bifunctional heparan sulfate N-deacetylase/N-sulfotransferase 1;Heparan sulfate N-deacetylase 1;Heparan sulfate N-sulfotransferase 1	NDST1	S	179	VGIIGFFKANENSLLSAQLKGFPLFLHSNLG	1
P56181-2	NADH dehydrogenase [ubiquinone] flavoprotein 3, mitochondrial	NDUFV3	S	98	PSSYPPAVNKGRKVASPSPSGSVLFTDEGVP	0.995678
O76041	Nebulette	NEBL	S	699	SAVKYKGELQRGTAISDPPELKRAKENQKNI	1
O76041	Nebulette	NEBL	T	696	EQLSAVKYKGELQRGTAISDPPELKRAKENQ	1
P12036	Neurofilament heavy polypeptide	NEFH	S	511	GGEEETKSPPAEEAASPEKEAKSPVKEEAKS	1
P51957	Serine/threonine-protein kinase Nek4	NEK4	S	461	PLIKEQKPKDQSLALSPKLECSGTILAHSNL	0.999996
O60524	Nuclear export mediator factor NEMF	NEMF	S	831	LSAKERREMKKKKLPSDSGDLEALEGKDKEK	0.999731
Q96JN8	Neuralized-like protein 4	NEURL4	S	502	HSDRLRRNNAILRALSPEGALRRAAPAAQAE	1
P35240	Merlin	NF2	S	518	DSLSFDFKDTDMKRLSMEIEKEKVEYMEKSK	1
P08651	Nuclear factor 1 C-type	NFIC	S	333	EGGISSPVKKTEMDKSPFNSPSPQDSPRLSS	0.999966
Q16649	Nuclear factor interleukin-3-regulated protein	NFIL3	S	301	SDGEDEQQVPKGPIHSPVELKHVHATVVKVP	1
Q16649	Nuclear factor interleukin-3-regulated protein	NFIL3	S	353	VEAFDNEFEATQKLSSPIDMTSKRHFELEKH	0.999403
Q6P4R8	Nuclear factor related to kappa-B-binding protein	NFRKB	S	1291	GSSKAVSTVVVTTAPSPKQAPEQQ_______	0.994336
Q6T4R5	Nance-Horan syndrome protein	NHS	S	233	TRPPCVEELHRHARQSLQALRREHRSRSDRR	1
Q9BYG3	MKI67 FHA domain-interacting nucleolar phosphoprotein	NIFK	S	247	GPTPVCTPTFLERRKSQVAELNDDDKDDEIV	1
Q9BYG3	MKI67 FHA domain-interacting nucleolar phosphoprotein	NIFK	T	223	QVLRKKKKKVSGTLDTPEKTVDSQGPTPVCT	1
Q8N4C6-5	Ninein	NIN	S	1556	EEDSISNLKLGTLNGSQEEMWQKTETVKQEN	1
Q6KC79	Nipped-B-like protein	NIPBL	S	350	EKEQSEKAAMYDIISSPSKDSTKLTLRLSRV	0.862819
Q6KC79	Nipped-B-like protein	NIPBL	S	2658	TNARNKAITSLLGGGSPKNNTAAETEDDESD	0.999997
Q6KC79	Nipped-B-like protein	NIPBL	S	1042	SLKPIKNKPSKSNKGSIDQSVLKELPPELLA	0.999995
Q6KC79	Nipped-B-like protein	NIPBL	S	892	SRERPSSGEQKSRPDSPRVKQGDSNKSRSDK	0.999997
Q6KC79	Nipped-B-like protein	NIPBL	T	735	GHPETPKQKGDGRPETPKQKGESRPETPKQK	1
Q6KC79	Nipped-B-like protein	NIPBL	T	713	SRPETPKQKGESRPETPKQKSDGHPETPKQK	0.999895
Q6KC79	Nipped-B-like protein	NIPBL	T	757	SRPETPKQKNEGRPETPKHRHDNRRDSGKPS	1
P30414	NK-tumor recognition protein;Putative peptidyl-prolyl cis-trans isomerase	NKTR	S	243	RRPKVKRSKKRRKEASSSEEPRNKHAMNPKG	0.999475
Q9BYT8	Neurolysin, mitochondrial	NLN	T	59	GRNVLRWDLSPEQIKTRTEELIVQTKQVYDA	0.999999
Q9BYT8	Neurolysin, mitochondrial	NLN	T	61	NVLRWDLSPEQIKTRTEELIVQTKQVYDAVG	0.999999
Q13287	N-myc-interactor	NMI	S	16	MEADKDDTQQILKEHSPDEFIKDEQNKGLID	1
P30419	Glycylpeptide N-tetradecanoyltransferase 1	NMT1	S	47	DCENEEDNSYNRGGLSPANDTGAKKKKKKQK	1
O60551	Glycylpeptide N-tetradecanoyltransferase 2	NMT2	S	38	GIDGDNEEETEHAKGSPGGYLGAKKKKKKQK	1
Q9ULX3	RNA-binding protein NOB1	NOB1	S	201	EEEEEENGFEDRKDDSDDDGGGWITPSNIKQ	1
Q76FK4	Nucleolar protein 8	NOL8	S	660	QKRQTTFESQDRKAVSPSSSEKRSKNPISRP	0.997816
Q5SY16	Polynucleotide 5'-hydroxyl-kinase NOL9	NOL9	S	487	AAFADALEFADEEKESPVEFTGHKLIGVYTD	0.999999
Q14978-2	Nucleolar and coiled-body phosphoprotein 1	NOLC1	S	573	GTSALTAQNGKAAKNSEEEEEEKKKAAVVVS	1
Q14978-2	Nucleolar and coiled-body phosphoprotein 1	NOLC1	S	548	DDSSEEEEEKLKGKGSPRPQAPKANGTSALT	1
Q14978-2	Nucleolar and coiled-body phosphoprotein 1	NOLC1	T	617	AKEAETPQAKKIKLQTPNTFPKRKKGEKRAS	1
P78316	Nucleolar protein 14	NOP14	S	349	KDGKMNVEEDVQEEQSKEASDPESNEEEGDS	1
P46087	Probable 28S rRNA (cytosine(4447)-C(5))-methyltransferase	NOP2	S	732	NAPPKGTDTQTPAVLSPSKTQATLKPKDHHQ	0.96624
P46087	Probable 28S rRNA (cytosine(4447)-C(5))-methyltransferase	NOP2	S	734	PPKGTDTQTPAVLSPSKTQATLKPKDHHQPL	0.750094
P46087	Probable 28S rRNA (cytosine(4447)-C(5))-methyltransferase	NOP2	S	58	LSSRARKRAAKRRLGSVEAPKTNKSPEAKPL	1
P46087	Probable 28S rRNA (cytosine(4447)-C(5))-methyltransferase	NOP2	T	195	WSEEETEDEEEEKEVTPESGPPKVEEADGGL	0.999977
O00567	Nucleolar protein 56	NOP56	S	519	SKPKKKKSFSKEELMSSDLEETAGSTSIPKR	1
O00567	Nucleolar protein 56	NOP56	S	520	KPKKKKSFSKEELMSSDLEETAGSTSIPKRK	1
O00567	Nucleolar protein 56	NOP56	S	569	SGSKKKRKFSKEEPVSSGPEEAVGKSSSKKK	1
O00567	Nucleolar protein 56	NOP56	S	570	GSKKKRKFSKEEPVSSGPEEAVGKSSSKKKK	1
O00567	Nucleolar protein 56	NOP56	S	519	SKPKKKKSFSKEELMSSDLEETAGSTSIPKR	1
O00567	Nucleolar protein 56	NOP56	S	520	KPKKKKSFSKEELMSSDLEETAGSTSIPKRK	1
O00567	Nucleolar protein 56	NOP56	S	569	SGSKKKRKFSKEEPVSSGPEEAVGKSSSKKK	1
O00567	Nucleolar protein 56	NOP56	S	570	GSKKKRKFSKEEPVSSGPEEAVGKSSSKKKK	1
Q9Y2X3	Nucleolar protein 58	NOP58	S	502	KKKRGKKKHIKEEPLSEEEPCTSTAIASPEK	1
Q9Y2X3	Nucleolar protein 58	NOP58	T	508	KKHIKEEPLSEEEPCTSTAIASPEKKKKKKK	0.852344
P06748	Nucleophosmin	NPM1	S	137	DAESEDEEEEDVKLLSISGKRSAPGGGSKVP	0.999956
E5RI98		NPM1	S	6	__________MNYEGSPIKVTLATLKMSVQP	1
P06748	Nucleophosmin	NPM1	S	70	DELHIVEAEAMNYEGSPIKVTLATLKMSVQP	1
P06748	Nucleophosmin	NPM1	S	243	FKKQEKTPKTPKGPSSVEDIKAKMQASIEKG	0.995866
P06748	Nucleophosmin	NPM1	S	227	KDSKPSSTPRSKGQESFKKQEKTPKTPKGPS	1
O75607	Nucleoplasmin-3	NPM3	S	16	MAAGTAAALAFLSQESRTRAGGVGGLRVPAP	0.839676
P13056	Nuclear receptor subfamily 2 group C member 1	NR2C1	S	64	HDGSTPSKVILARQDSTPGKVFLTTPDAAGV	0.979526
P49116	Nuclear receptor subfamily 2 group C member 2	NR2C2	S	219	CAASTEKIYIRKDLRSPLIATPTFVADKDGA	0.998396
P49116	Nuclear receptor subfamily 2 group C member 2	NR2C2	S	46	TGQKIQIVTAVDASGSPKQQFILTSPDGAGT	0.955585
P49116	Nuclear receptor subfamily 2 group C member 2	NR2C2	S	68	LTSPDGAGTGKVILASPETSSAKQLIFTTSD	0.943762
Q9UHY1	Nuclear receptor-binding protein	NRBP1	S	2	______________MSEGESQTVLSSGSDPK	1
Q9UHY1	Nuclear receptor-binding protein	NRBP1	T	433	EEVTSPVVPPSVKTPTPEPAEVETRKVVLMQ	0.998741
Q96L73	Histone-lysine N-methyltransferase, H3 lysine-36 and H4 lysine-20 specific	NSD1	S	2471	MDLIDLTPRQKERAASPHQVTPQADEKMPVL	0.999888
Q96L73	Histone-lysine N-methyltransferase, H3 lysine-36 and H4 lysine-20 specific	NSD1	S	483	HDLLLNGCLKSLAFDSEHSADEKEKPCAKSR	0.999994
Q96L73	Histone-lysine N-methyltransferase, H3 lysine-36 and H4 lysine-20 specific	NSD1	S	486	LLNGCLKSLAFDSEHSADEKEKPCAKSRARK	1
P46459	Vesicle-fusing ATPase	NSF	S	207	SLNLIGKAKTKENRQSIINPDWNFEKMGIGG	1
Q9UNZ2	NSFL1 cofactor p47	NSFL1C	S	114	SERSGQQIVGPPRKKSPNELVDDLFKGAKEH	1
Q9H0G5	Nuclear speckle splicing regulatory protein 1	NSRP1;CCDC55	S	457	VGVQSSERNQDRKESSPNSRAKDKFLDQERS	0.983246
Q9H0G5	Nuclear speckle splicing regulatory protein 1	NSRP1;CCDC55	S	248	ILQTDVKVEENPDADSDFDAKSSADDEIEET	1
Q9H0G5	Nuclear speckle splicing regulatory protein 1	NSRP1;CCDC55	T	275	IEETRVNCRREKVIETPENDFKHHRSQNHSR	1
Q08J23	tRNA (cytosine(34)-C(5))-methyltransferase	NSUN2	S	473	ADLTEGKPTDPSKLESPSFTGTGDTEIAHAT	0.999843
Q08J23	tRNA (cytosine(34)-C(5))-methyltransferase	NSUN2	S	456	KLQGKSAETRESTQLSPADLTEGKPTDPSKL	0.97395
Q96P11-2	Probable 28S rRNA (cytosine-C(5))-methyltransferase;Putative methyltransferase NSUN5C	NSUN5;NSUN5P2	S	444	SSASQAKASAPERTPSPAPKRKKRQQRAAAG	0.99998
Q96P11-2	Probable 28S rRNA (cytosine-C(5))-methyltransferase;Putative methyltransferase NSUN5C	NSUN5;NSUN5P2	S	327	GMPSRQLEEPGAGTPSPVRLHALAGFQQRAL	0.950833
Q96P11-2	Probable 28S rRNA (cytosine-C(5))-methyltransferase;Putative methyltransferase NSUN5C	NSUN5;NSUN5P2	S	444	SSASQAKASAPERTPSPAPKRKKRQQRAAAG	0.99998
Q96P11-2	Probable 28S rRNA (cytosine-C(5))-methyltransferase;Putative methyltransferase NSUN5C	NSUN5;NSUN5P2	T	442	VPSSASQAKASAPERTPSPAPKRKKRQQRAA	0.998085
Q8TCD5	5'(3')-deoxyribonucleotidase, cytosolic type	NT5C	S	182	HNRHLVLPPTRRRLLSWSDNWREILDSKRGA	0.999557
Q9H1E3	Nuclear ubiquitous casein and cyclin-dependent kinase substrate 1	NUCKS1	S	181	EKKMPKPRLKATVTPSPVKGKGKVGRPTASK	1
Q9H1E3	Nuclear ubiquitous casein and cyclin-dependent kinase substrate 1	NUCKS1	S	79	KDVKTKKDDSHSAEDSEDEKEDHKNVRQQRQ	1
Q9H1E3	Nuclear ubiquitous casein and cyclin-dependent kinase substrate 1	NUCKS1	S	214	KEKTPSPKEEDEEPESPPEKKTSTSPPPEKS	1
Q9H1E3	Nuclear ubiquitous casein and cyclin-dependent kinase substrate 1	NUCKS1	S	40	DYGRDSGPPTKKIRSSPREAKNKRRSGKNSQ	0.994364
Q9H1E3	Nuclear ubiquitous casein and cyclin-dependent kinase substrate 1	NUCKS1	S	223	EDEEPESPPEKKTSTSPPPEKSGDEGSEDEA	0.988083
Q9H1E3	Nuclear ubiquitous casein and cyclin-dependent kinase substrate 1	NUCKS1	S	58	EAKNKRRSGKNSQEDSEDSEDKDVKTKKDDS	1
Q9H1E3	Nuclear ubiquitous casein and cyclin-dependent kinase substrate 1	NUCKS1	S	19	PVRNRKVVDYSQFQESDDADEDYGRDSGPPT	1
Q9H1E3	Nuclear ubiquitous casein and cyclin-dependent kinase substrate 1	NUCKS1	S	181	EKKMPKPRLKATVTPSPVKGKGKVGRPTASK	1
Q9H1E3	Nuclear ubiquitous casein and cyclin-dependent kinase substrate 1	NUCKS1	S	214	KEKTPSPKEEDEEPESPPEKKTSTSPPPEKS	1
Q9H1E3	Nuclear ubiquitous casein and cyclin-dependent kinase substrate 1	NUCKS1	S	204	VGRPTASKASKEKTPSPKEEDEEPESPPEKK	1
Q9H1E3	Nuclear ubiquitous casein and cyclin-dependent kinase substrate 1	NUCKS1	T	179	RKEKKMPKPRLKATVTPSPVKGKGKVGRPTA	0.999999
Q9H1E3	Nuclear ubiquitous casein and cyclin-dependent kinase substrate 1	NUCKS1	T	202	GKVGRPTASKASKEKTPSPKEEDEEPESPPE	1
Q9H1E3	Nuclear ubiquitous casein and cyclin-dependent kinase substrate 1	NUCKS1	S	214	KEKTPSPKEEDEEPESPPEKKTSTSPPPEKS	1
Q9H1E3	Nuclear ubiquitous casein and cyclin-dependent kinase substrate 1	NUCKS1	S	204	VGRPTASKASKEKTPSPKEEDEEPESPPEKK	1
Q9H1E3	Nuclear ubiquitous casein and cyclin-dependent kinase substrate 1	NUCKS1	T	202	GKVGRPTASKASKEKTPSPKEEDEEPESPPE	1
Q9Y266	Nuclear migration protein nudC	NUDC	S	139	DAENHEAQLKNGSLDSPGKQDTEEDEEEDEK	1
Q9Y266	Nuclear migration protein nudC	NUDC	T	145	AQLKNGSLDSPGKQDTEEDEEEDEKDKGKLK	0.999999
Q9BZD4	Kinetochore protein Nuf2	NUF2	S	247	SLKEIQESLKTKIVDSPEKLKNYKEKMKDTV	1
Q7Z417	Nuclear fragile X mental retardation-interacting protein 2	NUFIP2	S	212	YITNGYMGKGADNDGSGSESGYTTPKKRKAR	0.999644
Q7Z417	Nuclear fragile X mental retardation-interacting protein 2	NUFIP2	S	572	EHPVFPKAYELEKRTSPQVLGSILKSGTTSE	0.837404
Q7Z417	Nuclear fragile X mental retardation-interacting protein 2	NUFIP2	T	571	TEHPVFPKAYELEKRTSPQVLGSILKSGTTS	0.756631
Q14980-2	Nuclear mitotic apparatus protein 1	NUMA1	S	1743	PRTQPDGTSVPGEPASPISQRLPPKVESLES	0.995065
Q14980-2	Nuclear mitotic apparatus protein 1	NUMA1	S	271	QRIDRLALLNEKQAASPLEPKELEELRDKNE	1
Q14980-2	Nuclear mitotic apparatus protein 1	NUMA1	T	1986	QQRKRVSLEPHQGPGTPESKKATSCFPRPMT	0.999854
Q9Y6R0	Numb-like protein	NUMBL	S	263	AAPTVAPGPAQPGHVSPTPATTSPGEKGEAG	0.837069
Q8WUM0	Nuclear pore complex protein Nup133	NUP133	S	131	CLVCKEKLIIWKIALSPITKLSVCKELQLPP	0.975812
P49790	Nuclear pore complex protein Nup153	NUP153	S	320	SSTARRILQSLEKMSSPLADAKRIPSIVSSP	0.998976
P49790	Nuclear pore complex protein Nup153	NUP153	S	614	PAEILKEGSVLDILKSPGFASPKIDSVAAQP	1
P49790	Nuclear pore complex protein Nup153	NUP153	S	516	PINSSQALTNKVQMTSPSSTGSPMFKFSSPI	0.996622
Q5SRE5	Nucleoporin NUP188 homolog	NUP188	S	1709	LLSSLSRYFRRGAPSSPATGVLPSPQGKSTS	0.982708
Q8TEM1	Nuclear pore membrane glycoprotein 210	NUP210	S	1874	SSPTSPNALPPARKASPPSGLWSPAYASH__	0.999963
Q8TEM1	Nuclear pore membrane glycoprotein 210	NUP210	S	780	MSCPLLQQNKQVVPVSSHRNPRLDLAAYDQE	1
Q8TEM1	Nuclear pore membrane glycoprotein 210	NUP210	S	781	SCPLLQQNKQVVPVSSHRNPRLDLAAYDQEG	1
P35658	Nuclear pore complex protein Nup214	NUP214	S	430	KTPERLSLEGERQPKSPGSTPTTPTSSQAPQ	0.999464
P35658	Nuclear pore complex protein Nup214	NUP214	S	433	ERLSLEGERQPKSPGSTPTTPTSSQAPQKLD	0.996887
P35658	Nuclear pore complex protein Nup214	NUP214	T	437	LEGERQPKSPGSTPTTPTSSQAPQKLDASAA	0.999829
P35658	Nuclear pore complex protein Nup214	NUP214	S	430	KTPERLSLEGERQPKSPGSTPTTPTSSQAPQ	0.999464
P35658	Nuclear pore complex protein Nup214	NUP214	S	433	ERLSLEGERQPKSPGSTPTTPTSSQAPQKLD	0.996887
P35658	Nuclear pore complex protein Nup214	NUP214	T	434	RLSLEGERQPKSPGSTPTTPTSSQAPQKLDA	0.891053
P35658	Nuclear pore complex protein Nup214	NUP214	T	437	LEGERQPKSPGSTPTTPTSSQAPQKLDASAA	0.999829
Q9UKX7	Nuclear pore complex protein Nup50	NUP50	S	221	RNSESESNKVAAETQSPSLFGSTKLQQESTF	0.999079
Q99567	Nuclear pore complex protein Nup88	NUP88	S	442	FLGSDEEDKDSLQELSTEQKCFVEHILCTKP	0.794557
Q99567	Nuclear pore complex protein Nup88	NUP88	S	517	SPPLLCTREDVEVAESPLRVLAETPDSFEKH	1
Q99567	Nuclear pore complex protein Nup88	NUP88	S	430	SVGLTWIHKLHKFLGSDEEDKDSLQELSTEQ	1
P52948	Nuclear pore complex protein Nup98-Nup96;Nuclear pore complex protein Nup98;Nuclear pore complex protein Nup96	NUP98	S	888	WVFKVSHFSKYGLQDSDEEEEEHPSKTSTKK	1
Q9BXS6	Nucleolar and spindle-associated protein 1	NUSAP1	T	349	AAVITPFKLTTEATQTPVSNKKPVFDLKASL	0.765083
Q9Y530	O-acetyl-ADP-ribose deacetylase 1	OARD1	S	4	____________MASSLNEDPEGSRITYVKG	0.840004
O75665	Oral-facial-digital syndrome 1 protein	OFD1	T	421	LELELESVKAQSLAITKQNHMLNEKVKEMSD	0.873063
Q9NZT2	Opioid growth factor receptor	OGFR	S	484	AAVASGGAQTLALAGSPAPSGHPKAGHSENG	0.959187
O43482	Protein Mis18-beta	OIP5	S	225	LKSLMKILSEVTPDQSKPEN___________	0.999282
Q13415	Origin recognition complex subunit 1	ORC1	S	273	SPGRIKRKVAFSEITSPSKRSQPDKLQTLSP	0.864887
Q9Y5N6	Origin recognition complex subunit 6	ORC6	T	195	EKIGQQVDREPGDVATPPRKRKKIVVEAPAK	1
P22059	Oxysterol-binding protein 1	OSBP	S	193	LAKAKAVKMLAESDESGDEESVSQTDKTELQ	1
P22059	Oxysterol-binding protein 1	OSBP	S	379	EIITMPENLGHKRTGSNISGASSDISLDEQY	0.96873
P22059	Oxysterol-binding protein 1	OSBP	S	382	TMPENLGHKRTGSNISGASSDISLDEQYKHQ	0.999966
P22059	Oxysterol-binding protein 1	OSBP	S	379	EIITMPENLGHKRTGSNISGASSDISLDEQY	0.96873
P22059	Oxysterol-binding protein 1	OSBP	S	382	TMPENLGHKRTGSNISGASSDISLDEQYKHQ	0.999966
P22059	Oxysterol-binding protein 1	OSBP	S	385	ENLGHKRTGSNISGASSDISLDEQYKHQLEE	0.808886
Q9BZF1	Oxysterol-binding protein-related protein 8;Oxysterol-binding protein	OSBPL8	S	14	__MEGGLADGEPDRTSLLGDSKDVLGPSTVV	0.951573
Q01804	OTU domain-containing protein 4	OTUD4	S	893	QNIVLPSDEKGELDLSLENLDLSKDCGSVST	1
Q01804	OTU domain-containing protein 4	OTUD4	S	546	STLENITDDKYATVSSPSKSKKLECPSPAEQ	0.776394
Q01804	OTU domain-containing protein 4	OTUD4	S	1023	GANSVDSRVQRPKEESSEDENEVSNILRSGR	0.999985
Q01804	OTU domain-containing protein 4	OTUD4	S	1024	ANSVDSRVQRPKEESSEDENEVSNILRSGRS	0.999986
Q9UQ80	Proliferation-associated protein 2G4	PA2G4	S	2	______________MSGEDEQQEQTIAEDLV	1
Q86U42	Polyadenylate-binding protein 2;Bcl-2-like protein 2	PABPN1;BCL2L2	S	150	KLKELQNEVEKQMNMSPPPGNAGPVIMSIEE	1
Q86VP3	Phosphofurin acidic cluster sorting protein 2	PACS2	S	349	EIGSIHSARSHKEPPSPADVPEKTRSLGGRQ	1
Q8N7H5	RNA polymerase II-associated factor 1 homolog	PAF1	S	394	EEEEEMETEEKEAGGSDEEQEKGSSSEKEGS	1
Q9NWQ8	Phosphoprotein associated with glycosphingolipid-enriched microdomains 1	PAG1	S	288	EKEGGEAEESATDTTSETNKRFSSLSYKSRE	0.935773
P22234	Multifunctional protein ADE2;Phosphoribosylaminoimidazole-succinocarboxamide synthase;Phosphoribosylaminoimidazole carboxylase	PAICS	S	27	KLYEGKTKEVYELLDSPGKVLLQSKDQITAG	1
Q9NWT1	p21-activated protein kinase-interacting protein 1	PAK1IP1	S	320	KVADMKESLPPAAEPSPVSKEQSKIGKKEPG	0.986934
Q13177	Serine/threonine-protein kinase PAK 2;PAK-2p27;PAK-2p34	PAK2	S	132	KKNPQAVLDVLKFYDSNTVKQKYLSFTPPEK	0.961922
Q13177	Serine/threonine-protein kinase PAK 2;PAK-2p27;PAK-2p34	PAK2	S	55	LPSVPEEKKPRHKIISIFSGTEKGSKKKEKE	0.999999
Q13177	Serine/threonine-protein kinase PAK 2;PAK-2p27;PAK-2p34	PAK2	S	2	______________MSDNGELEDKPPAPPVR	1
Q13177	Serine/threonine-protein kinase PAK 2;PAK-2p27;PAK-2p34	PAK2	S	141	VLKFYDSNTVKQKYLSFTPPEKDGFPSGTPA	0.999986
O96013	Serine/threonine-protein kinase PAK 4	PAK4	S	181	GSGGPQESSRDKRPLSGPDVGTPQPAGLASG	1
Q504Q3-2	PAB-dependent poly(A)-specific ribonuclease subunit PAN2	PAN2	S	1185	GRKMDWKVPEPEGQTSPKNAAVFSSVLAL__	0.948979
Q8TEW0	Partitioning defective 3 homolog	PARD3	S	873	ADETKLNTVDDQKAGSPSRDVGPSLGLKKSS	0.83764
Q8TEW0	Partitioning defective 3 homolog	PARD3	S	852	SDASQLDFVKTRKSKSMDLGIADETKLNTVD	1
Q86W56	Poly(ADP-ribose) glycohydrolase	PARG	S	302	CLGNSPPFEKESEPESPMDVDNSKNSCQDSE	0.999539
O95453	Poly(A)-specific ribonuclease PARN	PARN	S	619	GRKKAKKLKRMKKELSPAGSISKNSPATLFE	1
O95453	Poly(A)-specific ribonuclease PARN	PARN	T	206	LLQSEENKNLDLEPCTGFQRKLIYQTLSWKY	1
O95453	Poly(A)-specific ribonuclease PARN	PARN	S	619	GRKKAKKLKRMKKELSPAGSISKNSPATLFE	1
O95453	Poly(A)-specific ribonuclease PARN	PARN	S	623	AKKLKRMKKELSPAGSISKNSPATLFEVPDT	0.980661
Q8N3A8	Poly [ADP-ribose] polymerase 8	PARP8	T	250	KERFGLGHQLKKIMQTFVTQQWKQSKEKSNC	1
Q8N3A8	Poly [ADP-ribose] polymerase 8	PARP8	T	253	FGLGHQLKKIMQTFVTQQWKQSKEKSNCLHN	1
Q9Y5B6	PAX3- and PAX7-binding protein 1	PAXBP1	S	262	EPGKGRLVREDENDASDDEDDDEKRRIVFSV	1
Q9BVG4	Protein PBDC1	PBDC1	S	181	EGEKGVNNGGEKRADSGEEENTKNGGEKGAD	1
O94913	Pre-mRNA cleavage complex 2 protein Pcf11	PCF11	S	489	SSTRKRSRSRSPKSRSPIIHSPKRRDRRSPK	1
O94913	Pre-mRNA cleavage complex 2 protein Pcf11	PCF11	S	494	RSRSRSPKSRSPIIHSPKRRDRRSPKRRQRS	1
O94913	Pre-mRNA cleavage complex 2 protein Pcf11	PCF11	S	487	GRSSTRKRSRSRSPKSRSPIIHSPKRRDRRS	1
O94913	Pre-mRNA cleavage complex 2 protein Pcf11	PCF11	S	489	SSTRKRSRSRSPKSRSPIIHSPKRRDRRSPK	1
O94913	Pre-mRNA cleavage complex 2 protein Pcf11	PCF11	S	494	RSRSRSPKSRSPIIHSPKRRDRRSPKRRQRS	1
Q9BSM1	Polycomb group RING finger protein 1	PCGF1	S	3	_____________MASPQGGQIAIAMRLRNQ	1
Q9H4Z3	Phosphorylated CTD-interacting factor 1	PCIF1	S	159	SPSIPGTPTLKMWGTSPEDKQQAALLRPTEV	0.952541
Q9H4Z3	Phosphorylated CTD-interacting factor 1	PCIF1	S	116	VETPPAENKPRKRQLSEEQPSGNGVKKPKIE	1
E7ETA6	Pericentriolar material 1 protein	PCM1	S	1283	VDPTTVTKTFKTRKASAQASLASKDKTPKSK	1
E7ETA6	Pericentriolar material 1 protein	PCM1	S	1290	KTFKTRKASAQASLASKDKTPKSKSKKRNST	0.987682
E7ETA6	Pericentriolar material 1 protein	PCM1	S	2015	GNSETLKEPETVGAQSI______________	0.999389
E7ETA6	Pericentriolar material 1 protein	PCM1	S	1722	QSCAKEAKRILEDHGSPAGEIDDEDKDKDET	1
E7ETA6	Pericentriolar material 1 protein	PCM1	S	1950	LVNDYEAESGNISQKSDEEDFVKVEDLPLKL	1
E7ETA6	Pericentriolar material 1 protein	PCM1	S	65	KKFGVESDKRVTNDISPESSPGVGRRRTKTP	0.993209
E7ETA6	Pericentriolar material 1 protein	PCM1	S	1283	VDPTTVTKTFKTRKASAQASLASKDKTPKSK	1
E7ETA6	Pericentriolar material 1 protein	PCM1	S	1287	TVTKTFKTRKASAQASLASKDKTPKSKSKKR	0.991868
O95613	Pericentrin	PCNT	S	44	GDSSHSEKKTAKRKGSAVDASVQEESPVTKE	1
P49585	Choline-phosphate cytidylyltransferase A	PCYT1A	S	362	SPANLSRHKAAAYDISEDEED__________	1
Q53EL6	Programmed cell death protein 4	PDCD4	S	457	QLRDLCPSRGRKRFVSEGDGGRLKPESY___	1
Q08499-11	cAMP-specific 3',5'-cyclic phosphodiesterase 4D	PDE4D	S	287	ISNTFLDKQHEVEIPSPTQKEKEKKKRPMSQ	0.912551
A0A087WVF8	Myomegalin	PDE4DIP	Y	1183	STQHLRSQLSQCKQRYQDLQEKLLLSEATVF	1
O60658	High affinity cAMP-specific and IBMX-insensitive 3',5'-cyclic phosphodiesterase 8A	PDE8A	T	706	LEENGETDKNQEVINTMLRTPENRTLIKRML	1
P08559	Pyruvate dehydrogenase E1 component subunit alpha, somatic form, mitochondrial	PDHA1	S	232	PCIFICENNRYGMGTSVERAAASTDYYKRGD	0.970001
Q96JY6	PDZ and LIM domain protein 2	PDLIM2	S	197	GLGRAGDSAVLVLPPSPGPRSSRPSMDSEGG	1
O15530	3-phosphoinositide-dependent protein kinase 1;Putative 3-phosphoinositide-dependent protein kinase 2	PDPK1;PDPK2P	S	241	TAKVLSPESKQARANSFVGTAQYVSPELLTE	0.999125
Q29RF7	Sister chromatid cohesion protein PDS5 homolog A	PDS5A	S	1305	KPINKGRKRAAVGQESPGGLEAGNAKAPKLQ	1
Q9NTI5	Sister chromatid cohesion protein PDS5 homolog B	PDS5B	S	1358	SKQHRVSRRAQQRAESPESSAIESTQSTPQK	0.999997
Q9NTI5	Sister chromatid cohesion protein PDS5 homolog B	PDS5B	S	1283	KRLKEDILENEDEQNSPPKKGKRGRPPKPLG	1
Q9NTI5	Sister chromatid cohesion protein PDS5 homolog B	PDS5B	S	1257	KPKGSQRSRKRGHTASESDEQQWPEEKRLKE	0.932125
Q9NTI5	Sister chromatid cohesion protein PDS5 homolog B	PDS5B	S	1383	QSTPQKGRGRPSKTPSPSQPKKNVRVGRSKQ	0.999514
Q8NEN9	PDZ domain-containing protein 8	PDZD8	S	521	RAQNEFKDEAQSLSHSPKRVPTTLSIKPLGA	0.97029
Q15121	Astrocytic phosphoprotein PEA-15	PEA15	S	116	RIPSAKKYKDIIRQPSEEEIIKLAPPPKKA_	1
Q15121	Astrocytic phosphoprotein PEA-15	PEA15	S	104	ISEEDELDTKLTRIPSAKKYKDIIRQPSEEE	1
Q9H792	Pseudopodium-enriched atypical kinase 1	PEAK1	S	281	MRGQPRFANFRANTLSPVRFFVDKKWNTIPL	0.999977
P30086	Phosphatidylethanolamine-binding protein 1;Hippocampal cholinergic neurostimulating peptide	PEBP1	S	52	LGKVLTPTQVKNRPTSISWDGLDSGKLYTLV	0.8247
O15534	Period circadian protein homolog 1	PER1	S	704	EGATPRKEPVVGGTLSPLALANKAESVVSVT	0.889402
P40855	Peroxisomal biogenesis factor 19	PEX19	S	147	TLSGLAKNATDLQNSSMSEEELTKAMEGLGM	0.796128
O15067	Phosphoribosylformylglycinamidine synthase	PFAS	S	530	HDQGAGGNGNVLKELSDPAGAIIYTSRFQLG	0.999749
Q9NQP4	Prefoldin subunit 4	PFDN4	S	125	RVLADLKVQLYAKFGSNINLEADES______	1
Q16877	6-phosphofructo-2-kinase/fructose-2,6-bisphosphatase 4;6-phosphofructo-2-kinase;Fructose-2,6-bisphosphatase	PFKFB4	S	3	_____________MASPRELTQNPLKKIWMP	0.997987
Q01813	ATP-dependent 6-phosphofructokinase, platelet type	PFKP	S	783	YDVSDSGQLEHVQPWSV______________	1
P07737	Profilin-1	PFN1	S	28	ADGTCQDAAIVGYKDSPSVWAAVPGKTFVNI	0.995811
P07737	Profilin-1	PFN1	Y	7	_________MAGWNAYIDNLMADGTCQDAAI	1
P00558	Phosphoglycerate kinase 1	PGK1	S	115	VGPEVEKACANPAAGSVILLENLRFHVEEEG	1
P00558	Phosphoglycerate kinase 1	PGK1	S	203	FLMKKELNYFAKALESPERPFLAILGGAKVA	1
P00558	Phosphoglycerate kinase 1;Phosphoglycerate kinase 2	PGK1;PGK2	S	153	KKIKAEPDKIEAFRASLSKLGDVYVNDAFGT;NKVKAEPAKIEAFRASLSKLGDVYVNDAFGT	0.998212
P00558	Phosphoglycerate kinase 1;Phosphoglycerate kinase 2	PGK1;PGK2	S	155	IKAEPDKIEAFRASLSKLGDVYVNDAFGTAH;VKAEPAKIEAFRASLSKLGDVYVNDAFGTAH	0.963805
P36871	Phosphoglucomutase-1	PGM1	S	117	IIRKIKAIGGIILTASHNPGGPNGDFGIKFN	0.999978
O00264	Membrane-associated progesterone receptor component 1	PGRMC1	S	181	HVGKLLKEGEEPTVYSDEEEPKDESARKND_	0.98532
O00264	Membrane-associated progesterone receptor component 1	PGRMC1	S	57	LYKIVRGDQPAASGDSDDDEPPPLPRLKRRD	0.997655
O15173	Membrane-associated progesterone receptor component 2	PGRMC2	S	90	WGRRGLGAGAGAGEESPATSLPRMKKRDFSL	0.959333
O75167	Phosphatase and actin regulator 2;Phosphatase and actin regulator	PHACTR2	T	25	KASIANSDGPTAGSQTPPFKRKGKLSTIGKI	0.999582
Q8IZ21-3	Phosphatase and actin regulator 4	PHACTR4	T	12	____MVLDSVEAGDTTPPTKRKSKFSGFGKI	0.771974
Q8NDX5	Polyhomeotic-like protein 3	PHC3	S	263	NKTTVTSSKISQRDPSPESNKKGESPSLESR	0.999675
Q8NDX5	Polyhomeotic-like protein 3	PHC3	S	842	RKPDNQSLGHRGRRPSGPDGAAREHILRQLP	1
O94880	PHD finger protein 14	PHF14	S	84	ELNEDIKVKEEQLKNSAEEEVLSSEKQLIKM	1
O94880	PHD finger protein 14	PHF14	S	835	KKIPIRNTRTRGRKRSFVPEEEKHEERVPRE	1
O94880	PHD finger protein 14	PHF14	S	298	DEELTNDSLTLSQSKSNEDSLILEKSQNWSS	1
O94880	PHD finger protein 14	PHF14	S	298	DEELTNDSLTLSQSKSNEDSLILEKSQNWSS	1
O94880	PHD finger protein 14	PHF14	S	302	TNDSLTLSQSKSNEDSLILEKSQNWSSQKMD	1
O94880	PHD finger protein 14	PHF14	S	290	VLSRNSADDEELTNDSLTLSQSKSNEDSLIL	0.974027
O94880	PHD finger protein 14	PHF14	T	287	KSKVLSRNSADDEELTNDSLTLSQSKSNEDS	0.999944
O75151	Lysine-specific demethylase PHF2	PHF2	S	474	SDEVCDGDREKEEPPSPIEATPPQSLLEKVS	1
Q9BVI0	PHD finger protein 20	PHF20	S	488	MKYFHGMEKSLEPEESPGKRHVQTRGPSASD	1
Q96BD5-3	PHD finger protein 21A	PHF21A	S	456	FGALTPTSPQSSHPDSPENEKTETTFTFPAP	0.965275
Q8IWS0	PHD finger protein 6	PHF6	S	155	ADLEESFNEHELEPSSPKSKKKSRKGRPRKT	0.904296
Q9UPP1	Histone lysine demethylase PHF8	PHF8	S	857	GACFKDAEYIYPSLESDDDDPALKSRPKKKK	0.956839
Q9UPP1	Histone lysine demethylase PHF8	PHF8	S	880	KSRPKKKKNSDDAPWSPKARVTPTLPKQDRP	1
Q8WWQ0	PH-interacting protein	PHIP	S	911	KKEKKKVNEEKDGPISPKKKKPKERKQKRLA	1
Q8WWQ0	PH-interacting protein	PHIP	S	1281	YNIIPLYNSMKKKVLSDSEDEEKDADVPGTS	1
Q8WWQ0	PH-interacting protein	PHIP	S	1283	IIPLYNSMKKKVLSDSEDEEKDADVPGTSTR	1
Q9P1Y6	PHD and RING finger domain-containing protein 1	PHRF1	S	1360	HLLRPDAAEKAEAPSSPDVAPAGKEDSPSAS	1
Q9P1Y6	PHD and RING finger domain-containing protein 1	PHRF1	S	1359	PHLLRPDAAEKAEAPSSPDVAPAGKEDSPSA	1
Q9P1Y6	PHD and RING finger domain-containing protein 1	PHRF1	S	1360	HLLRPDAAEKAEAPSSPDVAPAGKEDSPSAS	1
Q9BTU6	Phosphatidylinositol 4-kinase type 2-alpha	PI4K2A	S	47	PGGAVRVAAAAGSGPSPPGSPGHDRERQPLL	0.874779
Q9BTU6	Phosphatidylinositol 4-kinase type 2-alpha	PI4K2A	S	51	VRVAAAAGSGPSPPGSPGHDRERQPLLDRAR	0.998843
Q9UBF8-2	Phosphatidylinositol 4-kinase beta	PI4KB	S	266	KRELPSLSPAPDTGLSPSKRTHQRSKSDATA	0.941524
Q9UBF8-2	Phosphatidylinositol 4-kinase beta	PI4KB	S	277	DTGLSPSKRTHQRSKSDATASISLSSNLKRT	0.998168
Q92508	Piezo-type mechanosensitive ion channel component 1	PIEZO1	S	1646	REAGASLYQGLMRTASELLLDRRLRIPELEE	0.995188
Q6ZUJ8	Phosphoinositide 3-kinase adapter protein 1	PIK3AP1	S	642	LHFKEWQLNQKKRSESFRFQQENLKRLRDSI	0.862078
O00443	Phosphatidylinositol 4-phosphate 3-kinase C2 domain-containing subunit alpha	PIK3C2A	S	259	TDLEITDSKVSNLQVSPKSEDISKFDWLDLD	1
P48736	Phosphatidylinositol 4,5-bisphosphate 3-kinase catalytic subunit gamma isoform	PIK3CG	S	974	NLFHIDFGHILGNYKSFLGINKERVPFVLTP	1
Q99570	Phosphoinositide 3-kinase regulatory subunit 4	PIK3R4	S	853	QEPDDKRARKHVKQDSNVNEEWKSMFGSLDP	1
Q8WYR1	Phosphoinositide 3-kinase regulatory subunit 5	PIK3R5	S	507	LLAPASRPQRRRPFLSGDEDPKASTLRVVVF	1
E9PDH4		PIKFYVE	S	475	GHSEPSWFKDIKFDDSDTEQIAEEGDDNLAK	0.999868
Q9Y2I7	1-phosphatidylinositol 3-phosphate 5-kinase	PIKFYVE	S	1754	KASGMLSFFRGTAGKSPDLSSQKRETLRGAD	0.999993
E5RJG9		PINX1	Y	126	FSLEEKSKISKNRVHYMKFTKVYC_______	0.999707
A2A3N6	Putative PIP5K1A and PSMD4-like protein;Phosphatidylinositol 4-phosphate 5-kinase type-1 alpha	PIPSL;PIP5K1A	S	405	RFMCNTVFKKIPLKPSPSKKFRSGSSFSRRA;RFMCNTVFKKIPLKPSPSKKLRSGSSFSQRA	0.994017
P48739	Phosphatidylinositol transfer protein beta isoform	PITPNB	S	262	EDETQKELETMRKRGSVRGTSAADV______	0.999843
P14618	Pyruvate kinase;Pyruvate kinase PKM	PKM	S	127	LDTKGPEIRTGLIKGSGTAEVELKKGATLKI	0.995404
P14618	Pyruvate kinase;Pyruvate kinase PKM	PKM	S	37	MADTFLEHMCRLDIDSPPITARNTGIICTIG	0.99793
P14618	Pyruvate kinase;Pyruvate kinase PKM	PKM	T	129	TKGPEIRTGLIKGSGTAEVELKKGATLKITL	0.993033
Q99640	Membrane-associated tyrosine- and threonine-specific cdc2-inhibitory kinase	PKMYT1	S	160	FRGPKDRARKLAEVGSHEKVGQHPCCVRLEQ	1
Q16512	Serine/threonine-protein kinase N1	PKN1	S	561	GDISVEKLNLGTDSDSSPQKSSRDPPSSPSS	0.908111
Q16512	Serine/threonine-protein kinase N1	PKN1	S	562	DISVEKLNLGTDSDSSPQKSSRDPPSSPSSL	0.992748
Q99569	Plakophilin-4	PKP4	S	314	PNGPTPQYQTTARVGSPLTLTDAQTRVASPS	0.999986
P47712	Cytosolic phospholipase A2;Phospholipase A2;Lysophospholipase	PLA2G4A	S	437	ENITTKHIVSNDSSDSDDESHEPKGTENEDA	0.998268
Q15149	Plectin	PLEC	S	1435	ELQLVTYKAQLEPVASPAKKPKVQSGSESVI	1
Q9H7P9	Pleckstrin homology domain-containing family G member 2	PLEKHG2	S	1318	ASRGSWSSAPTSRASSPPPQPQPPPPPARRL	0.979138
Q8TD55	Pleckstrin homology domain-containing family O member 2	PLEKHO2	S	488	GLREKRKELVTLYRRSAP_____________	0.998106
O60664	Perilipin-3	PLIN3	S	130	EKVLADTKELVSSKVSGAQEMVSSAKDTVAT	0.999994
Q6UX71	Plexin domain-containing protein 2	PLXDC2	S	356	QIGFNCSWCSKLQRCSSGFDRHRQDWVDSGC	0.884094
P29590	Protein PML	PML	S	505	KMESEEGKEARLARSSPEQPRPSTSKAVSPP	0.817706
P29590	Protein PML	PML	S	403	SCITQGKDAAVSKKASPEAASTPRDPIDVDL	0.943256
P29590	Protein PML	PML	T	867	GLLEGPALARAEGVSTPLAGRGLAERASQQS	0.840751
P29590	Protein PML	PML	S	518	RSSPEQPRPSTSKAVSPPHLDGPPSPRSPVI	1
P29590	Protein PML	PML	S	527	STSKAVSPPHLDGPPSPRSPVIGSEVFLPNS	1
Q9H307	Pinin	PNN	S	347	EEAGEEEEKEIAIVHSDAEKEQEEEEQKQEM	1
Q9H307	Pinin	PNN	S	450	PDKECKSLSPGKENVSALDMEKESEEKEEKE	1
Q9H307	Pinin	PNN	S	66	GGGRGRGSLLLRRGFSDSGGGPPAKQRDLEG	0.999534
P00491	Purine nucleoside phosphorylase	PNP	S	281	QAAQKLEQFVSILMASIPLPDKAS_______	0.919179
Q96AD5	Patatin-like phospholipase domain-containing protein 2	PNPLA2	S	428	AAYREALPGWMRNNLSLGDALAKWEECQRQL	1
Q7Z3K3	Pogo transposable element with ZNF domain	POGZ	S	425	SLDSEPSVPSAAKPPSPEKTAPVASTPSSTP	0.978603
Q15054	DNA polymerase delta subunit 3	POLD3	S	307	KVLQKEKKRGKRVALSDDETKETENMRKKRR	0.999999
Q9NR33	DNA polymerase epsilon subunit 4	POLE4	T	11	_____MAAAAAAGSGTPREEEGPAGEAAASQ	0.939305
Q9NP87	DNA-directed DNA/RNA polymerase mu	POLM	S	12	____MLPKRRRARVGSPSGDAASSTPPSTRF	0.996567
O95602	DNA-directed RNA polymerase I subunit RPA1;DNA-directed RNA polymerase	POLR1A	T	357	LALMAQEQKLPEEVATPTTDEEKDSLIAIDR	0.990768
P24928	DNA-directed RNA polymerase II subunit RPB1;DNA-directed RNA polymerase	POLR2A	S	1913	TSPVYTPTSPKYSPTSPTYSPTSPKYSPTSP	0.998309
P24928	DNA-directed RNA polymerase II subunit RPB1;DNA-directed RNA polymerase	POLR2A	S	1878	TSPKYSPTSPKYSPTSPTYSPTTPKYSPTSP	0.998781
P24928	DNA-directed RNA polymerase II subunit RPB1;DNA-directed RNA polymerase	POLR2A	S	1913	TSPVYTPTSPKYSPTSPTYSPTSPKYSPTSP	0.998309
P24928	DNA-directed RNA polymerase II subunit RPB1;DNA-directed RNA polymerase	POLR2A	S	1917	YTPTSPKYSPTSPTYSPTSPKYSPTSPTYSP	0.859736
P24928	DNA-directed RNA polymerase II subunit RPB1;DNA-directed RNA polymerase	POLR2A	S	1920	TSPKYSPTSPTYSPTSPKYSPTSPTYSPTSP	0.873219
P24928	DNA-directed RNA polymerase II subunit RPB1;DNA-directed RNA polymerase	POLR2A	S	1878	TSPKYSPTSPKYSPTSPTYSPTTPKYSPTSP	0.998781
P24928	DNA-directed RNA polymerase II subunit RPB1;DNA-directed RNA polymerase	POLR2A	S	1882	YSPTSPKYSPTSPTYSPTTPKYSPTSPTYSP	0.939745
A8CG34	Nuclear envelope pore membrane protein POM 121C;Nuclear envelope pore membrane protein POM 121	POM121C;POM121	S	2	______________MSPAAAAAGAGERRRPI	1
A8CG34	Nuclear envelope pore membrane protein POM 121C;Nuclear envelope pore membrane protein POM 121	POM121C;POM121	S	355	ASFVPKPGSLKRGLNSQSSDDHLNKRSRSSS	0.994906
A8CG34	Nuclear envelope pore membrane protein POM 121C;Nuclear envelope pore membrane protein POM 121	POM121C;POM121	S	358	VPKPGSLKRGLNSQSSDDHLNKRSRSSSMSS	0.927504
Q96KW2	POM121-like protein 2	POM121L2	S	1027	IGAKSKTPKNREKGHSRRHHAYKK_______	1
Q96KW2	POM121-like protein 2	POM121L2	T	1018	FRSSASSFSIGAKSKTPKNREKGHSRRHHAY	1
Q9NQ55	Suppressor of SWI4 1 homolog	PPAN;PPAN-P2RY11	S	359	RKKSLEGMKKARVGGSDEEASGIPSRTASLE	1
Q8NBV4	Probable lipid phosphate phosphatase PPAPDC3	PPAPDC3	S	93	KGIAFNSLLAIDICMSKRLGVCAGRAASWAS	1
Q13136	Liprin-alpha-1	PPFIA1	S	239	NHEQENTPSTSGKRSSDGSLSHEEDLAKVIE	0.800597
Q86W92	Liprin-beta-1	PPFIBP1	S	999	HMLKEDDMFKDFAARSPSASITDEDSNV___	0.969791
Q86W92	Liprin-beta-1	PPFIBP1	S	540	FGRGFFKIKSNKRTASAPNLAETEKETAEHL	0.989094
Q86W92	Liprin-beta-1	PPFIBP1	S	466	QLCDKLLTSSLQKSSSLGNLKKETSDGEKET	0.999988
Q86W92-2	Liprin-beta-1	PPFIBP1	S	534	KRTASAPNLDRKRSASAPTLAETEKETAEHL	0.850879
Q86W92	Liprin-beta-1	PPFIBP1	S	999	HMLKEDDMFKDFAARSPSASITDEDSNV___	0.969791
Q86W92	Liprin-beta-1	PPFIBP1	S	1003	EDDMFKDFAARSPSASITDEDSNV_______	0.990195
Q8ND30	Liprin-beta-2	PPFIBP2	S	414	CMDGNQPFPVLEPKDSPFLAEHKYPTLPGKL	1
Q8NEY8	Periphilin-1	PPHLN1	S	133	RERSPYKRDNTFFRESPVGRKDSPHSRSGSS	0.999622
Q08752	Peptidyl-prolyl cis-trans isomerase D	PPID	S	198	ELKEGDDGGIFPKDGSGDSHPDFPEDADIDL	0.997215
Q13427	Peptidyl-prolyl cis-trans isomerase G	PPIG	S	687	NSSNNSREKKADRDQSPFSKIKQSSQDNELK	0.999985
Q13427	Peptidyl-prolyl cis-trans isomerase G	PPIG	S	397	KGDKSELNEIKENQRSPVRVKERKITDHRNV	1
Q13427	Peptidyl-prolyl cis-trans isomerase G	PPIG	S	717	KSSMLKNKEDEKIRSSVEKENQKSKGQENDH	0.813404
O15355	Protein phosphatase 1G	PPM1G	S	527	ELQPESGKRKLEEVLSTEGAEENGNSDKKKK	0.997358
U3KQA9	Protein phosphatase 1J	PPM1J	S	69	RVMATIGVTRGLGDHSLKVCSSTLPIKPFLS	1
U3KQA9	Protein phosphatase 1J	PPM1J	T	58	FPLVCGEGKKARVMATIGVTRGLGDHSLKVC	1
U3KQA9	Protein phosphatase 1J	PPM1J	T	62	CGEGKKARVMATIGVTRGLGDHSLKVCSSTL	1
Q9Y570	Protein phosphatase methylesterase 1	PPME1	S	218	KTFKSLENAIEWSVKSGQIRNLESARVSMVG	0.99977
Q9Y570	Protein phosphatase methylesterase 1	PPME1	S	230	SVKSGQIRNLESARVSMVGQVKQCEGITSPE	0.877968
Q96QC0	Serine/threonine-protein phosphatase 1 regulatory subunit 10	PPP1R10	S	398	PGDPNQLTRKGRKRKSVTWPEEGKLREYFYF	0.971486
Q96QC0	Serine/threonine-protein phosphatase 1 regulatory subunit 10	PPP1R10	T	256	IPLKRQSNVAAPGDATPPAEKKYKPLNTTPN	0.999999
O14974	Protein phosphatase 1 regulatory subunit 12A	PPP1R12A	S	445	DESPATWRLGLRKTGSYGALAEITASKEGQK	0.998167
O14974	Protein phosphatase 1 regulatory subunit 12A	PPP1R12A	S	299	QKKQNLLHSEKRDKKSPLIESTANMDNNQSQ	0.98125
Q96I34	Protein phosphatase 1 regulatory subunit 16A	PPP1R16A	S	60	QGKKGPGERPRKEAASQGLLKQVLFPPSVVL	1
Q6NYC8	Phostensin	PPP1R18	S	368	TQKPEPPESAEKLLESPGVEAGEGEAEKEEA	1
P41236	Protein phosphatase inhibitor 2;Protein phosphatase inhibitor 2-like protein 3	PPP1R2;PPP1R2P3	S	121	AAEGLEPKYRIQEQESSGEEDSDLSPEEREK	0.999395
P41236	Protein phosphatase inhibitor 2;Protein phosphatase inhibitor 2-like protein 3	PPP1R2;PPP1R2P3	S	122	AEGLEPKYRIQEQESSGEEDSDLSPEEREKK	0.999395
O75864	Protein phosphatase 1 regulatory subunit 37	PPP1R37	S	561	PGSPSTPTEQRISVSSPGRGHKVFVVTRVES	0.861781
D3DTX6	Neurabin-2	PPP1R9B	S	192	GLQDRKLDVVVRFNGSTEALDKLDADAVSPT	0.832107
Q06190	Serine/threonine-protein phosphatase 2A regulatory subunit B'' subunit alpha	PPP2R3A	S	562	TGQTLVDLEPKSKVSSPIEKVSPSCLTRIIE	0.999999
Q13362-4	Serine/threonine-protein phosphatase 2A 56 kDa regulatory subunit gamma isoform	PPP2R5C	S	39	GQDTVESEQISVRKNSLVAVPSTVSAKIKVP	0.999999
Q13362-4	Serine/threonine-protein phosphatase 2A 56 kDa regulatory subunit gamma isoform	PPP2R5C	S	513	AQKDPKKDRPLARRKSELPQDPHTKKALEAH	0.999989
Q14738	Serine/threonine-protein phosphatase 2A 56 kDa regulatory subunit delta isoform	PPP2R5D	S	573	MLKDIKKEKVLLRRKSELPQDVYTIKALEAH	1
Q9NY27	Serine/threonine-protein phosphatase 4 regulatory subunit 2	PPP4R2	S	226	NHSDSSTSESEVSSVSPLKNKHPDEDAVEAE	0.868518
Q5H9R7	Serine/threonine-protein phosphatase 6 regulatory subunit 3	PPP6R3	S	617	EACCKERIQQFDDGGSDEEDIWEEKHIAFTP	1
Q96QH2	PML-RARA-regulated adapter molecule 1	PRAM1	S	406	RKLLQPERRGPPRKFSQPEPSAVLKRHPQPE	0.999997
Q92733	Proline-rich protein PRCC	PRCC	S	157	KEPVKIAAPELHKGDSDSEEDEPTKKKTILQ	0.999995
Q92733	Proline-rich protein PRCC	PRCC	S	267	AALQVTKQITQEEDDSDEEVAPENFFSLPEK	0.99999
Q92733	Proline-rich protein PRCC	PRCC	S	157	KEPVKIAAPELHKGDSDSEEDEPTKKKTILQ	0.999995
Q92733	Proline-rich protein PRCC	PRCC	S	159	PVKIAAPELHKGDSDSEEDEPTKKKTILQGS	0.999866
Q9NQV6	PR domain zinc finger protein 10	PRDM10	S	424	PKFIRLEITSENGEKSDDGTQDLLHFPTKEQ	0.999992
P10644	cAMP-dependent protein kinase type I-alpha regulatory subunit;cAMP-dependent protein kinase type I-alpha regulatory subunit, N-terminally processed	PRKAR1A	S	83	LQKAGTRTDSREDEISPPPPNPVVKGRRRRG	1
P10644	cAMP-dependent protein kinase type I-alpha regulatory subunit;cAMP-dependent protein kinase type I-alpha regulatory subunit, N-terminally processed	PRKAR1A	S	83	LQKAGTRTDSREDEISPPPPNPVVKGRRRRG	1
P13861	cAMP-dependent protein kinase type II-alpha regulatory subunit	PRKAR2A	T	54	RLREARAPASVLPAATPRQSLGHPPPEPGPD	0.999995
P13861	cAMP-dependent protein kinase type II-alpha regulatory subunit	PRKAR2A	S	78	PPEPGPDRVADAKGDSESEEDEDLEVPVPSR	1
P13861	cAMP-dependent protein kinase type II-alpha regulatory subunit	PRKAR2A	S	80	EPGPDRVADAKGDSESEEDEDLEVPVPSRFN	1
P05771-2	Protein kinase C beta type	PRKCB	S	11	_____MADPAAGPPPSEGEESTVRFARKGAL	0.977405
P05771	Protein kinase C beta type	PRKCB	T	642	TSNFDKEFTRQPVELTPTDKLFIMNLDQNEF	0.98654
P05771-2	Protein kinase C beta type	PRKCB	T	641	AENFDRFFTRHPPVLTPPDQEVIRNIDQSEF	1
Q05655	Protein kinase C delta type;Protein kinase C delta type regulatory subunit;Protein kinase C delta type catalytic subunit	PRKCD	S	645	YSNFDQEFLNEKARLSYSDKNLIDSMDQSAF	0.998227
Q05655	Protein kinase C delta type;Protein kinase C delta type regulatory subunit;Protein kinase C delta type catalytic subunit	PRKCD	S	664	KNLIDSMDQSAFAGFSFVNPKFEHLLED___	1
P78527	DNA-dependent protein kinase catalytic subunit	PRKDC	S	4026	FDWKNFEQKMLKKGGSWIQEINVAEKNWYPR	1
P78527	DNA-dependent protein kinase catalytic subunit	PRKDC	T	4060	CYAKRKLAGANPAVITCDELLLGHEKAPAFR	1
O75569	Interferon-inducible double-stranded RNA-dependent protein kinase activator A	PRKRA	S	18	QSRHRAEAPPLEREDSGTFSLGKMITAKPGK	0.806378
Q99873	Protein arginine N-methyltransferase 1	PRMT1	S	110	FAAKAGARKVIGIECSSISDYAVKIVKANKL	0.89601
Q86WR7	Proline and serine-rich protein 2	PROSER2	S	179	LPSTPDPPRRELRAPSPPVEHPRLLRSVPTP	1
O43395	U4/U6 small nuclear ribonucleoprotein Prp3	PRPF3	S	619	WDEQTSNTKGDDDEESDEEAVKKTNKCVLVW	1
O75400	Pre-mRNA-processing factor 40 homolog A	PRPF40A	S	888	KKKSKKRRHKSDSPESDAEREKDKKEKDRES	1
O75400	Pre-mRNA-processing factor 40 homolog A	PRPF40A	T	373	NTGEETSKQETVADFTPKKEEEESQPAKKTY	0.999986
O75400	Pre-mRNA-processing factor 40 homolog A	PRPF40A	S	885	KKHKKKSKKRRHKSDSPESDAEREKDKKEKD	0.790359
O75400	Pre-mRNA-processing factor 40 homolog A	PRPF40A	S	888	KKKSKKRRHKSDSPESDAEREKDKKEKDRES	1
Q13523	Serine/threonine-protein kinase PRP4 homolog	PRPF4B	S	20	ETQSLREQPEMEDANSEKSINEENGEVSEDQ	1
Q13523	Serine/threonine-protein kinase PRP4 homolog	PRPF4B	S	257	PTLRRRSQEKIGKARSPTDDKVKIEDKSKSK	0.999894
Q13523	Serine/threonine-protein kinase PRP4 homolog	PRPF4B	S	431	PRDDILSRRERSKDASPINRWSPTRRRSRSP	1
Q13523	Serine/threonine-protein kinase PRP4 homolog	PRPF4B	S	23	SLREQPEMEDANSEKSINEENGEVSEDQSQN	1
Q13523	Serine/threonine-protein kinase PRP4 homolog	PRPF4B	S	277	KVKIEDKSKSKDRKKSPIINESRSRDRGKKS	1
Q13523	Serine/threonine-protein kinase PRP4 homolog	PRPF4B	S	431	PRDDILSRRERSKDASPINRWSPTRRRSRSP	1
Q13523	Serine/threonine-protein kinase PRP4 homolog	PRPF4B	S	23	SLREQPEMEDANSEKSINEENGEVSEDQSQN	1
Q13523	Serine/threonine-protein kinase PRP4 homolog	PRPF4B	S	32	DANSEKSINEENGEVSEDQSQNKHSRHKKKK	0.999975
Q13523	Serine/threonine-protein kinase PRP4 homolog	PRPF4B	S	292	SPIINESRSRDRGKKSRSPVDLRGKSKDRRS	1
Q13523	Serine/threonine-protein kinase PRP4 homolog	PRPF4B	S	294	IINESRSRDRGKKSRSPVDLRGKSKDRRSRS	1
Q13523	Serine/threonine-protein kinase PRP4 homolog	PRPF4B	S	142	GKVQSGMGLILQGYESGSEEEGEIHEKARNG	0.99789
Q13523	Serine/threonine-protein kinase PRP4 homolog	PRPF4B	S	144	VQSGMGLILQGYESGSEEEGEIHEKARNGNR	0.999186
Q96HE9	Proline-rich protein 11	PRR11	S	40	SHFQSKLITPPPPPPSPERVGISSIDISQSR	0.999974
Q96HE9	Proline-rich protein 11	PRR11	S	307	QMDLRKLLRKVDVERSPGGTPLTNKENMETG	0.998156
Q9ULL5-3	Proline-rich protein 12	PRR12	T	1705	SAPPPKAPAPPPKPETPEKTTSEKPPEQTPE	1
Q9ULL5-3	Proline-rich protein 12	PRR12	S	915	GPPNSEGKDPAGAYRSPSPQGTKAPRFVPLT	0.996363
Q9ULL5-3	Proline-rich protein 12	PRR12	S	917	PNSEGKDPAGAYRSPSPQGTKAPRFVPLTSI	0.999698
P85299	Proline-rich protein 5	PRR5;PRR5-ARHGAP8	S	11	_____MRTLRRLKFMSSPSLSDLGKREPAAA	0.97582
P48634	Protein PRRC2A	PRRC2A	S	1147	LTQVPLAPPPPGAPPSPAPARFTARGGRVFT	0.999359
P48634	Protein PRRC2A	PRRC2A	S	380	SGEERPPEADGKKGNSPNSEPPTPKTAWAET	1
P48634	Protein PRRC2A	PRRC2A	S	808	GDVFTATPAEPRPLTSPLRQAADEDDKGMRS	0.796496
P48634	Protein PRRC2A	PRRC2A	S	1219	PSKEPLKEKLIPGPLSPVARGGSNGGSNVGM	1
P48634	Protein PRRC2A	PRRC2A	T	610	SKEGPEPPEEVPPPTTPPVPKVEPKGDGIGP	0.846048
Q5JSZ5	Protein PRRC2B	PRRC2B	S	556	KAGEARKQAEKEVPWSPSAEKASPQENGPAV	0.985942
Q5JSZ5	Protein PRRC2B	PRRC2B	S	388	AGLHEEVDYSEKLKFSDDEEEEEVVKDGRPK	1
E7EPN9	Protein PRRC2C	PRRC2C	S	2107	QPRAGPIKAQKLPDLSPVENKEHKPGPIGKE	1
O75475	PC4 and SFRS1-interacting protein	PSIP1	S	514	DSKDNHEASTKKKPSSEERETEISLKDSTLD	0.807232
O75475	PC4 and SFRS1-interacting protein	PSIP1	S	105	VKFSSQQAATKQSNASSDVEVEEKETSVSKE	0.845794
O75475	PC4 and SFRS1-interacting protein	PSIP1	S	106	KFSSQQAATKQSNASSDVEVEEKETSVSKED	0.962966
P25786	Proteasome subunit alpha type-1	PSMA1	S	177	GARSQSARTYLERHMSEFMECNLNELVKHGL	1
P28066	Proteasome subunit alpha type-5	PSMA5	S	56	QTSEGVCLAVEKRITSPLMEPSSIEKIVEID	0.887203
P40306	Proteasome subunit beta type-10	PSMB10	S	230	CVITKTGAKLLRTLSSPTEPVKRSGRYHFVP	0.760495
P17980	26S protease regulatory subunit 6A	PSMC3	S	9	_______MNLLPNIESPVTRQEKMATVWDEA	0.992085
Q99460	26S proteasome non-ATPase regulatory subunit 1	PSMD1	S	315	EEKTSSAFVGKTPEASPEPKDQTLKMIKILS	1
Q99460	26S proteasome non-ATPase regulatory subunit 1	PSMD1	S	315	EEKTSSAFVGKTPEASPEPKDQTLKMIKILS	1
Q99460	26S proteasome non-ATPase regulatory subunit 1	PSMD1	T	311	SMETEEKTSSAFVGKTPEASPEPKDQTLKMI	0.999993
O43242	26S proteasome non-ATPase regulatory subunit 3	PSMD3	S	47	PQDVEMKEEAATGGGSTGEADGKTAAAAAEH	0.798413
Q14997	Proteasome activator complex subunit 4	PSME4	S	1121	LLQQSKNPSINQILLSPEKIKEGIKRQQEKN	1
Q92530	Proteasome inhibitor PI31 subunit	PSMF1	S	153	IITPIHEQWEKANVSSPHREFPPATAREVDP	0.966879
Q6PGN9	Proline/serine-rich coiled-coil protein 1	PSRC1	S	70	VAPAPQGVRLSLGPLSPEKLEEILDEANRLA	0.999997
P48651	Phosphatidylserine synthase 1	PTDSS1	S	442	EISWHHRKGTKGSEDSPPKHAGNNESHSSRR	1
Q9BVG9	Phosphatidylserine synthase 2	PTDSS2	S	16	MRRGERRDAGGPRPESPVPAGRASLEEPPDG	1
Q05397	Focal adhesion kinase 1	PTK2	S	910	ADSYNEGVKLQPQEISPPPTANLDRSNDKVY	0.99885
Q05397	Focal adhesion kinase 1	PTK2	S	677	DPSRRPRFTELKAQLSTILEEEKAQQEERMR	1
Q05397	Focal adhesion kinase 1	PTK2	T	678	PSRRPRFTELKAQLSTILEEEKAQQEERMRM	1
Q14289-2	Protein-tyrosine kinase 2-beta	PTK2B	S	375	GSLIIHPRKDGEKRNSLPQIPMLNLEARRSH	1
Q14289-2	Protein-tyrosine kinase 2-beta	PTK2B	S	2	______________MSGVSEPLSRVKLGTLR	0.990393
Q14289-2	Protein-tyrosine kinase 2-beta	PTK2B	S	797	QEEKSLDPMVYMNDKSPLTPEKEVGYLEFTG	0.999918
Q14289-2	Protein-tyrosine kinase 2-beta	PTK2B	T	800	KSLDPMVYMNDKSPLTPEKEVGYLEFTGPPQ	1
P06454	Prothymosin alpha;Prothymosin alpha, N-terminally processed;Thymosin alpha-1	PTMA	S	2	______________MSDAAVDTSSEITTKDL	1
P06454	Prothymosin alpha;Prothymosin alpha, N-terminally processed;Thymosin alpha-1	PTMA	S	9	_______MSDAAVDTSSEITTKDLKEKKEVV	0.862379
P06454	Prothymosin alpha;Prothymosin alpha, N-terminally processed;Thymosin alpha-1	PTMA	S	10	______MSDAAVDTSSEITTKDLKEKKEVVE	0.821495
P06454	Prothymosin alpha;Prothymosin alpha, N-terminally processed;Thymosin alpha-1	PTMA	T	8	________MSDAAVDTSSEITTKDLKEKKEV	0.954551
P06454	Prothymosin alpha;Prothymosin alpha, N-terminally processed;Thymosin alpha-1	PTMA	S	2	______________MSDAAVDTSSEITTKDL	1
P06454	Prothymosin alpha;Prothymosin alpha, N-terminally processed;Thymosin alpha-1	PTMA	S	9	_______MSDAAVDTSSEITTKDLKEKKEVV	0.862379
P06454	Prothymosin alpha;Prothymosin alpha, N-terminally processed;Thymosin alpha-1	PTMA	T	8	________MSDAAVDTSSEITTKDLKEKKEV	0.954551
P20962	Parathymosin	PTMS	S	5	___________MSEKSVEAAAELSAKDLKEK	1
Q05209	Tyrosine-protein phosphatase non-receptor type 12	PTPN12	S	435	ESTIEQIDKKLERNLSFEIKKVPLQEGPKSF	1
Q05209	Tyrosine-protein phosphatase non-receptor type 12	PTPN12	T	509	SCVDCSVTQSNKVSVTPPEESQNSDTPPRPD	0.997019
P17706	Tyrosine-protein phosphatase non-receptor type 2;Tyrosine-protein phosphatase non-receptor type	PTPN2	S	304	WKELSKEDLSPAFDHSPNKIMTEKYNGNRIG	1
P29350	Tyrosine-protein phosphatase non-receptor type 6	PTPN6	Y	564	HAKASRTSSKHKEDVYENLHTKNKREEKVKK	1
P35236	Tyrosine-protein phosphatase non-receptor type 7	PTPN7	S	44	KTPAKKHVRLQERRGSNVALMLDVRSLGAVE	1
P35236	Tyrosine-protein phosphatase non-receptor type 7	PTPN7	S	110	KQLEEEFLKIPSNFVSPEDLDIPGHASKDRY	0.936411
P08575	Receptor-type tyrosine-protein phosphatase C;Protein-tyrosine-phosphatase	PTPRC	S	1297	TSGTEGPEHSVNGPASPALNQGS________	0.998129
P08575	Receptor-type tyrosine-protein phosphatase C;Protein-tyrosine-phosphatase	PTPRC	S	973	QHIGNQEENKSKNRNSNVIPYDYNRVPLKHE	0.999784
P10586	Receptor-type tyrosine-protein phosphatase F	PTPRF	S	1299	FKRKRTHSPSSKDEQSIGLKDSLLAHSSDPV	1
O95997	Securin;Securin-2	PTTG1;PTTG2	S	165	DEERELEKLFQLGPPSPVKMPSPPWESNLLQ	1
Q8TB72-3	Pumilio homolog 2	PUM2	S	136	AETDGPEKGDQKGKASPFEEDQNRDLKQGDD	1
Q8TB72-3	Pumilio homolog 2	PUM2	S	182	ADCKDFNRTPGSRQASPTEVVERLGPNTNPS	0.999999
Q96QR8	Transcriptional activator protein Pur-beta	PURB	S	304	KLYERRGGGSGGGEESEGEEVDED_______	0.999538
Q9Y606	tRNA pseudouridine synthase A, mitochondrial;tRNA pseudouridine synthase	PUS1	T	426	AKVPSPLEGSEGDGDTD______________	1
Q9Y606	tRNA pseudouridine synthase A, mitochondrial;tRNA pseudouridine synthase	PUS1	S	420	TAGGTGAKVPSPLEGSEGDGDTD________	0.999998
Q9Y606	tRNA pseudouridine synthase A, mitochondrial;tRNA pseudouridine synthase	PUS1	T	426	AKVPSPLEGSEGDGDTD______________	1
Q96PZ0	Pseudouridylate synthase 7 homolog	PUS7	T	610	KIPLFNTDVDNLEGKTPPVFASEGKYRALKM	0.999999
Q96N64	PWWP domain-containing protein 2A	PWWP2A	S	81	PPLPPPPPPPGELARSPEAVGPELEAEEKLS	1
Q53H96	Pyrroline-5-carboxylate reductase 3;Pyrroline-5-carboxylate reductase	PYCRL	S	7	_________MAAAEPSPRRVGFVGAGRMAGA	1
P06737	Glycogen phosphorylase, liver form	PYGL	S	838	QNIWNVEPSDLKISLSNESNKVNGN______	0.992789
Q15032-2	R3H domain-containing protein 1	R3HDM1	S	845	SRHGNRGRRQAKKAASTDLGAGETVVGKVLE	0.97567
P61026	Ras-related protein Rab-10	RAB10	S	188	KTPVKEPNSENVDISSGGGVTGWKSKCC___	0.931776
Q6WKZ4	Rab11 family-interacting protein 1	RAB11FIP1	S	202	DTASAIIPSTTPSVDSDDESVVKDKKKKSKI	0.991648
Q6WKZ4	Rab11 family-interacting protein 1	RAB11FIP1	S	357	SSPSPKGFRKKHLFSSTENLAAGSWKEPAEG	0.991026
Q6WKZ4	Rab11 family-interacting protein 1	RAB11FIP1	S	280	ESSSASDVMSHKRTASTDLKQLNQVNFTLPK	0.905645
Q6IQ22	Ras-related protein Rab-12	RAB12	S	21	ALQRRAGGGGGLGAGSPALSGGQGRRRKQPP	0.999154
P61106	Ras-related protein Rab-14	RAB14	S	204	GVQHKPSAPQGGRLTSEPQPQREGCGC____	0.999175
P51157	Ras-related protein Rab-28	RAB28	S	2	______________MSDSEEESQDRQLKIVV	0.999998
P51157	Ras-related protein Rab-28	RAB28	S	4	____________MSDSEEESQDRQLKIVVLG	0.999988
Q15042	Rab3 GTPase-activating protein catalytic subunit	RAB3GAP1	S	537	CCIERKKARDEGKKTSASDVTNIYPGDAGKA	0.977722
A0A087WXI0		RAB44	S	115	EEFSSGLKNIFGSSQSPHRLRRRKPLPSKRV	0.789063
A0A087WXI0		RAB44	S	131	PHRLRRRKPLPSKRVSATTSFPALEEADAEE	0.994947
A0A087WXI0	Ras-related protein Rab-44	RAB44	S	509	KVLIPLEDGPPPPANSPPPQAPAGSSKQIQA	1
P20340-2	Ras-related protein Rab-6A	RAB6A	S	2	______________MSTGGDFGNPLRKFKLV	0.977436
P61006	Ras-related protein Rab-8A	RAB8A	S	185	KAKMDKKLEGNSPQGSNQGVKITPDQQKRSS	1
Q92930	Ras-related protein Rab-8B	RAB8B	S	182	RDIMTKLNRKMNDSNSAGAGGPVKITENRSK	0.99951
Q15276	Rab GTPase-binding effector protein 1	RABEP1	S	407	KSDNDMFKDGLRRAQSTDSLGTSGSLQSKAL	0.831292
Q15276	Rab GTPase-binding effector protein 1	RABEP1	S	410	NDMFKDGLRRAQSTDSLGTSGSLQSKALGYN	0.992149
Q9Y3P9	Rab GTPase-activating protein 1	RABGAP1	T	996	RVKGISSTKEVLDEDTDEEKETLKNQLREME	1
P04049	RAF proto-oncogene serine/threonine-protein kinase;Serine/threonine-protein kinase A-Raf	RAF1;ARAF	S	621	IELLQHSLPKINRSASEPSLHRAAHTEDINA;IELLQRSLPKIERSASEPSLHRTQADELPAC	0.996984
Q7Z5J4	Retinoic acid-induced protein 1	RAI1	S	1358	KFACKAPGASPGNPLSPSLSDKDRGLKGAGG	0.984994
Q7Z5J4	Retinoic acid-induced protein 1	RAI1	S	1266	ASGNGGDGKEERPEGSPTLFKRMSSPKKAKP	0.997639
Q7Z5J4	Retinoic acid-induced protein 1	RAI1	S	1374	PSLSDKDRGLKGAGGSPVGVEEGLVNVGTGQ	1
Q7Z5J4	Retinoic acid-induced protein 1	RAI1	S	805	CLGFQEEDPPGEKVASLPGDFKQEEVGGVKE	1
Q15311	RalA-binding protein 1	RALBP1	S	463	RQECETKIAQEIASLSKEDVSKEEMNENEEV	0.989717
Q9UKM9	RNA-binding protein Raly	RALY	S	135	RDDFYDRLFDYRGRLSPVPVPRAVPVKRPRV	1
P43487	Ran-specific GTPase-activating protein;cAMP-dependent protein kinase inhibitor beta	RANBP1;PKIB	S	188	KNDHAEKVAEKLEALSVKEETKEDAEEKQ__	1
[truncated: 1,055 more rows]
